# Supplementary material
Source: publisher figshare collection journal article supplement (https://gsajournals.figshare.com/ndownloader/files/15738764)
Supplement: Supplementary file 1 [file 15738764]

## Sheet: S_Table_8
p_value_threshold	sample_name	rsid	chrm	bp	effect_allele	n_samples	beta	beta_se	p_value_raw	p_value_gc
0.003	Father_1886-1918	rs10508224	10	2200634	A	167000	0.01555	0.004619	0.0007623	0.001225
0.003	Father_1886-1918	rs10509324	10	72756178	A	167000	0.02202	0.006978	0.001605	0.002443
0.003	Father_1886-1918	rs10762351	10	71979635	C	167000	0.01618	0.004588	0.00042	0.0007047
0.003	Father_1886-1918	rs10781572	10	134225058	A	167000	-0.01144	0.003489	0.001043	0.001638
0.003	Father_1886-1918	rs10785965	10	82364513	G	167000	0.01146	0.003567	0.00132	0.002039
0.003	Father_1886-1918	rs10788283	10	124104476	A	167000	0.01098	0.003516	0.001783	0.002694
0.003	Father_1886-1918	rs10870228	10	134821422	A	167000	0.01137	0.00346	0.001014	0.001596
0.003	Father_1886-1918	rs10887623	10	88315181	G	167000	-0.03241	0.005798	2.261e-08	7.886e-08
0.003	Father_1886-1918	rs10887625	10	88341011	A	167000	-0.01764	0.005704	0.001986	0.002977
0.003	Father_1886-1918	rs10887636	10	88410251	A	167000	-0.02154	0.006639	0.001174	0.001827
0.003	Father_1886-1918	rs10903687	10	2200592	A	167000	0.01392	0.004209	0.0009407	0.001488
0.003	Father_1886-1918	rs10994944	10	63595191	A	167000	-0.01554	0.004809	0.001236	0.001918
0.003	Father_1886-1918	rs11002688	10	80575870	G	167000	-0.01487	0.004775	0.001849	0.002786
0.003	Father_1886-1918	rs11014049	10	18686452	A	167000	0.01172	0.003722	0.001633	0.002482
0.003	Father_1886-1918	rs11016536	10	130684713	A	163000	0.01323	0.004072	0.001157	0.001804
0.003	Father_1886-1918	rs11191514	10	104773364	A	167000	0.02125	0.00621	0.0006199	0.001011
0.003	Father_1886-1918	rs11254534	10	17368394	A	167000	0.01545	0.00385	5.98e-05	0.0001158
0.003	Father_1886-1918	rs11256106	10	9222228	C	167000	0.01563	0.004869	0.001321	0.002039
0.003	Father_1886-1918	rs11259554	10	15260996	G	165000	-0.01405	0.004298	0.001076	0.001686
0.003	Father_1886-1918	rs1189322	10	53134556	A	167000	-0.01509	0.00367	3.928e-05	7.844e-05
0.003	Father_1886-1918	rs1200817	10	37558907	A	167000	-0.01134	0.003465	0.001066	0.001672
0.003	Father_1886-1918	rs12359239	10	2721782	G	167000	-0.01081	0.003461	0.00179	0.002703
0.003	Father_1886-1918	rs12360283	10	50191089	A	167000	-0.02302	0.00728	0.001569	0.002392
0.003	Father_1886-1918	rs12413155	10	134810401	G	167000	-0.01207	0.003514	0.0005902	0.0009659
0.003	Father_1886-1918	rs12769610	10	54153591	C	166000	-0.02584	0.006666	0.0001058	0.0001964
0.003	Father_1886-1918	rs12774241	10	9264824	G	167000	0.01649	0.004904	0.0007715	0.001238
0.003	Father_1886-1918	rs1545045	10	127190028	C	167000	0.01329	0.004046	0.001019	0.001603
0.003	Father_1886-1918	rs1555485	10	114912534	A	167000	0.01367	0.004393	0.001853	0.002792
0.003	Father_1886-1918	rs16872	10	96970361	C	167000	-0.01246	0.003469	0.0003294	0.0005626
0.003	Father_1886-1918	rs17148768	10	10777085	G	167000	0.01427	0.004395	0.001171	0.001823
0.003	Father_1886-1918	rs17761619	10	112457142	G	167000	0.01908	0.005627	0.0006978	0.001128
0.003	Father_1886-1918	rs17828447	10	112432080	C	167000	0.01824	0.005648	0.001243	0.001928
0.003	Father_1886-1918	rs1891393	10	18427430	G	167000	-0.0122	0.003745	0.001124	0.001756
0.003	Father_1886-1918	rs1937688	10	53572544	A	166000	0.01288	0.003707	0.0005108	0.0008449
0.003	Father_1886-1918	rs2248503	10	10542217	A	167000	-0.012	0.003865	0.001903	0.002861
0.003	Father_1886-1918	rs2296596	10	13735947	G	167000	-0.02185	0.005593	9.327e-05	0.0001747
0.003	Father_1886-1918	rs2461221	10	123781339	A	167000	-0.01103	0.003462	0.001442	0.002213
0.003	Father_1886-1918	rs2588948	10	63594646	A	154000	-0.01402	0.004015	0.0004825	0.0008014
0.003	Father_1886-1918	rs2996520	10	8229430	G	167000	-0.01329	0.004119	0.001252	0.001941
0.003	Father_1886-1918	rs4074250	10	87268005	A	167000	-0.01162	0.003716	0.001761	0.002663
0.003	Father_1886-1918	rs4148394	10	101572343	C	167000	-0.01262	0.003967	0.001467	0.002247
0.003	Father_1886-1918	rs4314962	10	13737029	C	167000	-0.01897	0.004871	9.806e-05	0.000183
0.003	Father_1886-1918	rs4405249	10	124183732	A	167000	0.01579	0.00468	0.0007407	0.001193
0.003	Father_1886-1918	rs4414157	10	75808313	G	167000	-0.0177	0.004993	0.0003935	0.0006633
0.003	Father_1886-1918	rs4418698	10	18763854	A	166000	0.01333	0.003492	0.000135	0.0002462
0.003	Father_1886-1918	rs4631835	10	115525175	A	167000	-0.01303	0.004183	0.001843	0.002778
0.003	Father_1886-1918	rs4748472	10	18776197	G	167000	0.01335	0.003632	0.0002367	0.0004141
0.003	Father_1886-1918	rs4749976	10	10704323	G	167000	-0.01293	0.004094	0.00159	0.002423
0.003	Father_1886-1918	rs4751515	10	129581662	G	167000	0.01187	0.003837	0.001976	0.002964
0.003	Father_1886-1918	rs4880300	10	134783778	A	167000	-0.01211	0.003488	0.0005176	0.0008553
0.003	Father_1886-1918	rs4962355	10	128391896	G	167000	-0.01252	0.003965	0.001584	0.002414
0.003	Father_1886-1918	rs6482373	10	24493326	G	167000	-0.02261	0.00714	0.001541	0.002353
0.003	Father_1886-1918	rs6585817	10	124104396	G	167000	0.01388	0.004226	0.001023	0.001608
0.003	Father_1886-1918	rs695217	10	96977553	C	167000	-0.01234	0.003544	0.0004991	0.0008269
0.003	Father_1886-1918	rs7069290	10	98624993	A	167000	0.01437	0.004491	0.001373	0.002113
0.003	Father_1886-1918	rs7069607	10	80575173	G	167000	-0.01583	0.004496	0.0004317	0.0007228
0.003	Father_1886-1918	rs7076791	10	80066149	A	167000	-0.01415	0.003899	0.0002846	0.0004913
0.003	Father_1886-1918	rs7087073	10	85899713	A	167000	0.02248	0.007189	0.001768	0.002672
0.003	Father_1886-1918	rs7911451	10	9248331	A	167000	0.01478	0.004434	0.0008562	0.001364
0.003	Father_1886-1918	rs7912419	10	7788495	A	167000	-0.01526	0.00459	0.0008897	0.001413
0.003	Father_1886-1918	rs7919051	10	108754043	A	167000	-0.07265	0.02345	0.001944	0.002919
0.003	Father_1886-1918	rs7923688	10	72012813	G	167000	-0.01451	0.003703	8.931e-05	0.0001679
0.003	Father_1886-1918	rs911707	10	115331618	A	167000	0.01495	0.0046	0.001153	0.001797
0.003	Father_1886-1918	rs9419288	10	134810519	G	167000	-0.01415	0.003727	0.0001465	0.0002655
0.003	Father_1886-1918	rs1006099	11	17530463	A	167000	-0.01427	0.004229	0.0007375	0.001188
0.003	Father_1886-1918	rs10082701	11	1657308	A	167000	-0.02002	0.004408	5.608e-06	1.294e-05
0.003	Father_1886-1918	rs1015195	11	56544017	G	167000	-0.01281	0.003952	0.001187	0.001846
0.003	Father_1886-1918	rs10500996	11	25101688	A	167000	-0.07492	0.02126	0.0004239	0.0007108
0.003	Father_1886-1918	rs10768791	11	1643728	A	164000	-0.01124	0.003536	0.001485	0.002273
0.003	Father_1886-1918	rs10770040	11	9588893	A	167000	0.01815	0.00582	0.001819	0.002744
0.003	Father_1886-1918	rs10792360	11	55604412	A	165000	0.01625	0.004658	0.000487	0.0008084
0.003	Father_1886-1918	rs10831027	11	93068949	G	161000	0.01266	0.003625	0.0004772	0.0007932
0.003	Father_1886-1918	rs10836452	11	4694428	G	167000	0.01472	0.004629	0.001472	0.002255
0.003	Father_1886-1918	rs10839311	11	6075446	A	166000	0.01121	0.003493	0.001328	0.00205
0.003	Father_1886-1918	rs10892501	11	119818622	G	167000	0.0112	0.003518	0.001448	0.002221
0.003	Father_1886-1918	rs10894267	11	130714861	G	166000	-0.0125	0.003489	0.0003416	0.0005818
0.003	Father_1886-1918	rs10894332	11	131021493	G	166000	-0.03249	0.00869	0.0001853	0.0003301
0.003	Father_1886-1918	rs10897167	11	61291922	G	166000	0.02773	0.008481	0.001076	0.001686
0.003	Father_1886-1918	rs11024350	11	17656686	A	162000	-0.01645	0.00518	0.001499	0.002293
0.003	Father_1886-1918	rs11031375	11	31428184	G	167000	0.02604	0.006197	2.647e-05	5.442e-05
0.003	Father_1886-1918	rs11039358	11	47746962	G	142000	-0.02593	0.008049	0.001277	0.001976
0.003	Father_1886-1918	rs1108340	11	131112313	C	167000	0.01571	0.004376	0.0003316	0.000566
0.003	Father_1886-1918	rs11570094	11	47359706	A	167000	0.01217	0.003763	0.001219	0.001893
0.003	Father_1886-1918	rs11604009	11	1674938	A	167000	0.01284	0.003546	0.0002933	0.0005051
0.003	Father_1886-1918	rs11606426	11	43596350	G	167000	0.02219	0.005624	7.96e-05	0.0001509
0.003	Father_1886-1918	rs12224013	11	43514710	C	167000	0.03653	0.01073	0.0006666	0.001081
0.003	Father_1886-1918	rs12276132	11	99791995	G	167000	-0.01957	0.006237	0.001704	0.002582
0.003	Father_1886-1918	rs12281472	11	4679286	C	166000	-0.01125	0.003619	0.001882	0.002833
0.003	Father_1886-1918	rs12794212	11	126465148	A	167000	0.01745	0.005223	0.0008334	0.00133
0.003	Father_1886-1918	rs12799484	11	133399500	A	167000	-0.01394	0.004261	0.001071	0.001679
0.003	Father_1886-1918	rs12804958	11	51483139	C	167000	0.01752	0.005327	0.001009	0.001589
0.003	Father_1886-1918	rs1383348	11	36962971	G	167000	-0.01102	0.003499	0.001637	0.002488
0.003	Father_1886-1918	rs1401317	11	43975742	A	167000	0.01466	0.004495	0.001112	0.001738
0.003	Father_1886-1918	rs1453584	11	99807394	G	167000	0.01212	0.003469	0.0004788	0.0007958
0.003	Father_1886-1918	rs16927458	11	1676922	A	167000	0.01111	0.003464	0.001344	0.002073
0.003	Father_1886-1918	rs16933365	11	7901644	C	167000	-0.03025	0.009085	0.000868	0.001381
0.003	Father_1886-1918	rs17105870	11	106479962	G	167000	-0.02031	0.00519	9.116e-05	0.0001711
0.003	Father_1886-1918	rs17150526	11	56175534	A	167000	-0.01394	0.004181	0.0008532	0.00136
0.003	Father_1886-1918	rs1870675	11	115432255	A	167000	0.01124	0.003566	0.001624	0.00247
0.003	Father_1886-1918	rs1944142	11	130717440	G	167000	0.01118	0.003458	0.001231	0.00191
0.003	Father_1886-1918	rs1961758	11	36124199	A	167000	-0.0203	0.006018	0.0007431	0.001196
0.003	Father_1886-1918	rs2508678	11	94149349	A	167000	0.01158	0.003583	0.001224	0.0019
0.003	Father_1886-1918	rs2511766	11	131111310	A	167000	0.01922	0.004874	8.059e-05	0.0001526
0.003	Father_1886-1918	rs34667483	11	14663582	A	167000	-0.02063	0.006578	0.001713	0.002595
0.003	Father_1886-1918	rs372517	11	55533365	A	166000	0.01671	0.004868	0.0005995	0.0009801
0.003	Father_1886-1918	rs3740689	11	47380593	G	167000	-0.01186	0.003514	0.0007387	0.00119
0.003	Father_1886-1918	rs3817098	11	4674575	G	167000	0.01149	0.003465	0.0009104	0.001444
0.003	Father_1886-1918	rs4310595	11	40830146	A	167000	-0.02524	0.007732	0.001094	0.001713
0.003	Father_1886-1918	rs4482012	11	51205162	C	161000	0.01154	0.003711	0.001874	0.002821
0.003	Father_1886-1918	rs4519111	11	55951305	A	166000	-0.01328	0.004191	0.001532	0.00234
0.003	Father_1886-1918	rs4554901	11	133400279	A	167000	-0.01585	0.005018	0.001579	0.002407
0.003	Father_1886-1918	rs4625434	11	6072356	G	167000	0.01106	0.003513	0.001642	0.002495
0.003	Father_1886-1918	rs473057	11	117712887	G	167000	-0.0118	0.003463	0.0006531	0.001061
0.003	Father_1886-1918	rs4755854	11	44649231	G	167000	0.01168	0.003572	0.001072	0.00168
0.003	Father_1886-1918	rs4757045	11	20232335	G	167000	-0.01229	0.003623	0.00069	0.001117
0.003	Father_1886-1918	rs4758558	11	3253856	A	167000	0.02059	0.006162	0.0008356	0.001334
0.003	Father_1886-1918	rs476137	11	94213905	A	165000	0.01097	0.003518	0.001826	0.002754
0.003	Father_1886-1918	rs481845	11	70033583	A	167000	0.01722	0.005242	0.001022	0.001608
0.003	Father_1886-1918	rs486556	11	94248366	G	167000	0.01087	0.00349	0.001842	0.002777
0.003	Father_1886-1918	rs4937789	11	133392402	A	167000	-0.01578	0.004977	0.001518	0.002321
0.003	Father_1886-1918	rs509723	11	94248581	C	167000	0.01148	0.003654	0.001683	0.002553
0.003	Father_1886-1918	rs533984	11	94199272	A	167000	0.01174	0.003539	0.0009041	0.001435
0.003	Father_1886-1918	rs545457	11	56482335	C	167000	0.01403	0.003626	0.0001089	0.0002017
0.003	Father_1886-1918	rs559362	11	55275456	C	167000	0.01554	0.004589	0.0007097	0.001146
0.003	Father_1886-1918	rs588287	11	86232668	G	167000	0.01478	0.004774	0.001961	0.002942
0.003	Father_1886-1918	rs592068	11	94186955	G	167000	0.01322	0.003917	0.0007403	0.001192
0.003	Father_1886-1918	rs625993	11	126505327	A	167000	0.0139	0.003863	0.0003196	0.000547
0.003	Father_1886-1918	rs6483341	11	94130342	G	166000	0.01111	0.003494	0.001467	0.002248
0.003	Father_1886-1918	rs658845	11	56294275	A	167000	-0.014	0.004177	0.0008047	0.001288
0.003	Father_1886-1918	rs6591849	11	64218143	G	167000	-0.01179	0.003673	0.001324	0.002043
0.003	Father_1886-1918	rs663530	11	94157114	A	166000	0.01326	0.003966	0.0008298	0.001325
0.003	Father_1886-1918	rs7101624	11	132850055	A	167000	-0.01111	0.003486	0.001437	0.002205
0.003	Father_1886-1918	rs7117194	11	5210250	A	167000	0.01261	0.00356	0.0003956	0.0006666
0.003	Father_1886-1918	rs7122929	11	126998347	A	167000	-0.01683	0.005382	0.001768	0.002673
0.003	Father_1886-1918	rs7128086	11	17538539	G	167000	-0.02084	0.005382	0.0001078	0.0001999
0.003	Father_1886-1918	rs7130321	11	80653037	G	167000	-0.02961	0.00889	0.0008643	0.001376
0.003	Father_1886-1918	rs7927995	11	1659810	A	163000	-0.01339	0.003542	0.0001561	0.0002816
0.003	Father_1886-1918	rs7943936	11	130709067	G	167000	-0.01238	0.003456	0.0003421	0.0005827
0.003	Father_1886-1918	rs7943949	11	40840931	A	166000	-0.01962	0.005918	0.0009148	0.00145
0.003	Father_1886-1918	rs7951990	11	132929236	A	167000	0.02197	0.006019	0.0002614	0.0004541
0.003	Father_1886-1918	rs902219	11	1653445	G	167000	-0.01153	0.003473	0.0009039	0.001434
0.003	Father_1886-1918	rs903018	11	129479033	A	167000	0.01388	0.004225	0.00102	0.001605
0.003	Father_1886-1918	rs948028	11	120644447	C	167000	-0.01564	0.004686	0.0008426	0.001344
0.003	Father_1886-1918	rs1039378	12	99991075	A	166000	0.01109	0.00347	0.00139	0.002138
0.003	Father_1886-1918	rs10505741	12	10079527	A	167000	-0.03403	0.008834	0.0001172	0.0002159
0.003	Father_1886-1918	rs10747691	12	54451300	A	167000	0.01112	0.003512	0.001538	0.002348
0.003	Father_1886-1918	rs10770658	12	20586821	G	167000	0.01211	0.003684	0.00101	0.00159
0.003	Father_1886-1918	rs10774625	12	111910219	G	167000	0.01222	0.003458	0.0004103	0.0006895
0.003	Father_1886-1918	rs10774843	12	116382646	A	167000	0.01199	0.003559	0.0007537	0.001212
0.003	Father_1886-1918	rs10774844	12	116443463	A	167000	-0.03598	0.01056	0.0006611	0.001073
0.003	Father_1886-1918	rs10841520	12	20586395	A	142000	0.01444	0.004623	0.001784	0.002696
0.003	Father_1886-1918	rs10842078	12	23001124	G	167000	0.01249	0.003894	0.001334	0.002058
0.003	Father_1886-1918	rs10842678	12	26272824	A	167000	0.01193	0.003517	0.0006943	0.001123
0.003	Father_1886-1918	rs10849451	12	6524679	A	167000	0.01199	0.003461	0.0005333	0.0008793
0.003	Father_1886-1918	rs10875739	12	48480919	G	166000	-0.01088	0.003465	0.001687	0.002559
0.003	Father_1886-1918	rs10876135	12	51488236	A	167000	-0.0282	0.008706	0.0012	0.001866
0.003	Father_1886-1918	rs11045241	12	20583021	A	167000	0.01255	0.003674	0.0006346	0.001033
0.003	Father_1886-1918	rs11047278	12	24293172	A	164000	0.03669	0.01162	0.001599	0.002434
0.003	Father_1886-1918	rs11055350	12	13464674	G	167000	-0.01523	0.00448	0.0006772	0.001097
0.003	Father_1886-1918	rs11064607	12	1055452	G	167000	-0.01159	0.003474	0.0008478	0.001352
0.003	Father_1886-1918	rs11065934	12	111946837	A	155000	-0.08264	0.01613	3.009e-07	8.638e-07
0.003	Father_1886-1918	rs11109108	12	97958108	A	167000	-0.01218	0.003825	0.00145	0.002224
0.003	Father_1886-1918	rs11115544	12	83419504	A	142000	-0.01227	0.00389	0.001606	0.002444
0.003	Father_1886-1918	rs11116423	12	84884498	G	167000	0.01251	0.00347	0.0003122	0.0005353
0.003	Father_1886-1918	rs11609253	12	48358279	C	167000	0.01116	0.003496	0.001411	0.002167
0.003	Father_1886-1918	rs11611201	12	13442314	A	167000	-0.01163	0.003629	0.001348	0.002079
0.003	Father_1886-1918	rs12313493	12	9175109	A	163000	0.02778	0.008167	0.0006691	0.001085
0.003	Father_1886-1918	rs12369443	12	20582651	G	165000	0.01749	0.004374	6.379e-05	0.0001229
0.003	Father_1886-1918	rs12823001	12	84356791	G	167000	-0.01192	0.003464	0.0005781	0.0009476
0.003	Father_1886-1918	rs1382672	12	13492116	G	167000	-0.01441	0.004113	0.0004596	0.000766
0.003	Father_1886-1918	rs1450058	12	98339387	G	166000	0.01177	0.003625	0.00117	0.001822
0.003	Father_1886-1918	rs1486629	12	129660556	G	165000	-0.01124	0.003637	0.001991	0.002984
0.003	Father_1886-1918	rs1681993	12	63338414	A	167000	-0.04509	0.01266	0.0003668	0.0006216
0.003	Father_1886-1918	rs16930578	12	3691437	A	167000	-0.01622	0.005034	0.001278	0.001977
0.003	Father_1886-1918	rs17438004	12	126107443	C	166000	-0.01883	0.00515	0.0002558	0.000445
0.003	Father_1886-1918	rs17438276	12	126124203	C	166000	-0.01616	0.004394	0.0002355	0.0004122
0.003	Father_1886-1918	rs17757757	12	84242399	G	167000	-0.01191	0.0036	0.0009385	0.001485
0.003	Father_1886-1918	rs17772352	12	4124166	A	167000	-0.02055	0.006522	0.001628	0.002475
0.003	Father_1886-1918	rs1922444	12	84238955	G	167000	0.01207	0.00364	0.0009109	0.001445
0.003	Father_1886-1918	rs2017952	12	127814681	A	167000	-0.01839	0.005785	0.00148	0.002267
0.003	Father_1886-1918	rs2061530	12	84208823	C	167000	0.01103	0.003511	0.001684	0.002554
0.003	Father_1886-1918	rs2189791	12	126115561	A	165000	-0.01282	0.003545	0.0002974	0.0005117
0.003	Father_1886-1918	rs2190481	12	126272036	A	167000	-0.01253	0.004029	0.001871	0.002817
0.003	Father_1886-1918	rs2231696	12	69651700	G	141000	0.04818	0.01344	0.0003365	0.0005738
0.003	Father_1886-1918	rs2272391	12	50471630	A	167000	0.01136	0.003489	0.00113	0.001765
0.003	Father_1886-1918	rs2286024	12	48360620	A	167000	0.01094	0.00347	0.001623	0.002469
0.003	Father_1886-1918	rs233722	12	113031474	G	167000	-0.01154	0.003532	0.001093	0.00171
0.003	Father_1886-1918	rs2446662	12	84912500	G	167000	0.01228	0.003847	0.001406	0.002161
0.003	Father_1886-1918	rs3759290	12	62592104	A	167000	0.01441	0.004649	0.001938	0.00291
0.003	Father_1886-1918	rs4240718	12	80811051	A	142000	-0.03747	0.008691	1.622e-05	3.458e-05
0.003	Father_1886-1918	rs4388939	12	108900137	G	167000	-0.02214	0.007083	0.00177	0.002675
0.003	Father_1886-1918	rs4540907	12	131741531	G	161000	-0.01661	0.005017	0.0009327	0.001477
0.003	Father_1886-1918	rs4542481	12	80814405	G	166000	-0.01712	0.0049	0.0004745	0.0007891
0.003	Father_1886-1918	rs4587803	12	53209431	C	167000	0.01434	0.003456	3.335e-05	6.74e-05
0.003	Father_1886-1918	rs4638409	12	106035492	G	167000	0.01089	0.00346	0.001653	0.002511
0.003	Father_1886-1918	rs4759324	12	54471280	A	166000	0.01135	0.003481	0.001117	0.001746
0.003	Father_1886-1918	rs4763961	12	13438028	A	167000	-0.01166	0.003756	0.001917	0.002881
0.003	Father_1886-1918	rs4765603	12	125198366	G	167000	0.01079	0.003472	0.001878	0.002826
0.003	Father_1886-1918	rs4882972	12	9120903	A	167000	0.02985	0.009213	0.001198	0.001863
0.003	Father_1886-1918	rs500037	12	118139540	C	167000	0.01109	0.003468	0.001383	0.002128
0.003	Father_1886-1918	rs574678	12	63282047	G	167000	-0.06491	0.01848	0.0004441	0.0007421
0.003	Father_1886-1918	rs6489769	12	1072965	G	167000	0.01211	0.00358	0.0007177	0.001158
0.003	Father_1886-1918	rs7134341	12	119581131	C	167000	-0.06414	0.02031	0.001588	0.002419
0.003	Father_1886-1918	rs7135989	12	48655268	A	167000	-0.01179	0.003763	0.001726	0.002614
0.003	Father_1886-1918	rs7294672	12	132101949	A	167000	-0.01513	0.004613	0.001036	0.001627
0.003	Father_1886-1918	rs7299090	12	13411651	G	167000	-0.01491	0.004216	0.0004056	0.0006822
0.003	Father_1886-1918	rs7306772	12	89914142	A	167000	0.01211	0.003817	0.001511	0.002311
0.003	Father_1886-1918	rs7307055	12	131345236	A	167000	-0.01229	0.003571	0.0005782	0.0009477
0.003	Father_1886-1918	rs7308929	12	10038205	A	165000	-0.02667	0.007303	0.0002596	0.0004512
0.003	Father_1886-1918	rs7311856	12	48321699	G	167000	0.01076	0.003468	0.001924	0.002891
0.003	Father_1886-1918	rs735295	12	547683	G	167000	0.01439	0.004004	0.0003268	0.0005585
0.003	Father_1886-1918	rs7358598	12	26285545	A	167000	0.02623	0.00767	0.000626	0.00102
0.003	Father_1886-1918	rs7485334	12	20592201	C	165000	0.01412	0.003809	0.0002104	0.0003712
0.003	Father_1886-1918	rs7959052	12	53205757	G	167000	-0.01685	0.004544	0.0002097	0.0003702
0.003	Father_1886-1918	rs7961280	12	6528069	A	167000	-0.01281	0.003519	0.0002722	0.0004714
0.003	Father_1886-1918	rs7970027	12	122780375	G	149000	-0.01204	0.003796	0.001514	0.002315
0.003	Father_1886-1918	rs7976678	12	6537544	A	166000	-0.01321	0.003582	0.0002263	0.0003972
0.003	Father_1886-1918	rs7976699	12	6403990	A	167000	-0.01131	0.003519	0.001316	0.002032
0.003	Father_1886-1918	rs9919764	12	13492704	A	167000	-0.01269	0.003963	0.001367	0.002105
0.003	Father_1886-1918	rs10161651	13	30780458	C	142000	0.01187	0.003761	0.001603	0.00244
0.003	Father_1886-1918	rs1330102	13	44845243	A	167000	-0.01425	0.004519	0.00161	0.002451
0.003	Father_1886-1918	rs1334823	13	69924178	G	167000	-0.0183	0.004951	0.0002194	0.0003859
0.003	Father_1886-1918	rs1387784	13	85804087	A	160000	-0.0193	0.005651	0.0006355	0.001035
0.003	Father_1886-1918	rs1529370	13	49478028	C	167000	0.01187	0.003537	0.0007948	0.001273
0.003	Father_1886-1918	rs17220832	13	74644353	A	167000	0.01617	0.00509	0.001492	0.002283
0.003	Father_1886-1918	rs17589482	13	30761173	A	167000	-0.02243	0.005188	1.533e-05	3.282e-05
0.003	Father_1886-1918	rs1925388	13	91028418	G	166000	-0.01426	0.004486	0.001477	0.002262
0.003	Father_1886-1918	rs1926501	13	109348151	A	167000	-0.01148	0.003532	0.001159	0.001807
0.003	Father_1886-1918	rs1998659	13	44880783	A	167000	-0.01436	0.004096	0.0004553	0.0007595
0.003	Father_1886-1918	rs2389910	13	98117164	A	167000	-0.01353	0.00383	0.0004106	0.00069
0.003	Father_1886-1918	rs2555605	13	33833810	G	167000	0.01178	0.003593	0.00104	0.001633
0.003	Father_1886-1918	rs4489875	13	36080945	C	167000	-0.03586	0.01012	0.0003942	0.0006644
0.003	Father_1886-1918	rs6563036	13	78874633	A	167000	-0.01122	0.003567	0.00165	0.002507
0.003	Father_1886-1918	rs675828	13	103350733	A	167000	-0.01077	0.003456	0.001831	0.002761
0.003	Father_1886-1918	rs7321093	13	29147841	G	167000	-0.01124	0.003446	0.001105	0.001728
0.003	Father_1886-1918	rs7983906	13	110950035	A	161000	-0.01651	0.005133	0.001298	0.002006
0.003	Father_1886-1918	rs7984044	13	91049604	C	167000	-0.01304	0.004089	0.001423	0.002186
0.003	Father_1886-1918	rs7991404	13	27506178	A	167000	0.02158	0.00587	0.0002377	0.0004158
0.003	Father_1886-1918	rs9506275	13	30781111	A	167000	0.01137	0.003469	0.001053	0.001652
0.003	Father_1886-1918	rs9509659	13	21924162	G	163000	0.01106	0.003517	0.00167	0.002535
0.003	Father_1886-1918	rs9510325	13	23347116	A	167000	0.01125	0.003533	0.00146	0.002237
0.003	Father_1886-1918	rs9513245	13	98123216	G	167000	-0.01269	0.003722	0.0006512	0.001058
0.003	Father_1886-1918	rs9528890	13	65691393	A	167000	0.01107	0.003509	0.001601	0.002437
0.003	Father_1886-1918	rs9530104	13	73426566	G	166000	-0.01545	0.004636	0.0008604	0.00137
0.003	Father_1886-1918	rs9530145	13	73645300	A	167000	-0.01437	0.004627	0.001893	0.002848
0.003	Father_1886-1918	rs9543158	13	73459637	G	166000	-0.01929	0.004803	5.897e-05	0.0001143
0.003	Father_1886-1918	rs9551866	13	30769735	A	167000	-0.01206	0.003596	0.0007957	0.001274
0.003	Father_1886-1918	rs9567406	13	44877318	G	167000	-0.01881	0.005298	0.0003853	0.0006506
0.003	Father_1886-1918	rs9567484	13	32824153	A	167000	0.021	0.006571	0.001398	0.00215
0.003	Father_1886-1918	rs9576847	13	40118575	G	167000	0.02046	0.006165	0.000902	0.001432
0.003	Father_1886-1918	rs9592634	13	69974997	C	166000	-0.01611	0.004323	0.0001937	0.0003439
0.003	Father_1886-1918	rs975797	13	73797952	A	167000	0.0145	0.004429	0.00106	0.001663
0.003	Father_1886-1918	rs10047808	14	36925048	A	167000	-0.01092	0.003484	0.001724	0.002611
0.003	Father_1886-1918	rs10138026	14	55879255	A	167000	-0.0507	0.01303	9.934e-05	0.0001852
0.003	Father_1886-1918	rs10142876	14	90920340	C	166000	0.01263	0.003562	0.0003915	0.0006603
0.003	Father_1886-1918	rs10146272	14	31656890	G	167000	0.01256	0.003853	0.001117	0.001746
0.003	Father_1886-1918	rs10151458	14	89876847	A	167000	0.01554	0.004915	0.001569	0.002393
0.003	Father_1886-1918	rs10483851	14	73391340	A	167000	0.01516	0.004852	0.001778	0.002687
0.003	Father_1886-1918	rs10498473	14	55582786	G	167000	-0.07281	0.0194	0.0001747	0.0003126
0.003	Father_1886-1918	rs11844384	14	51486123	G	167000	0.01082	0.003493	0.001958	0.002938
0.003	Father_1886-1918	rs11847875	14	42545841	C	167000	-0.04327	0.009855	1.131e-05	2.476e-05
0.003	Father_1886-1918	rs12050262	14	100228552	A	167000	0.03537	0.01034	0.0006267	0.001021
0.003	Father_1886-1918	rs12432203	14	51710861	G	167000	0.01899	0.005999	0.001546	0.00236
0.003	Father_1886-1918	rs1244370	14	34694960	A	167000	-0.0157	0.004775	0.001011	0.001592
0.003	Father_1886-1918	rs1286086	14	91439180	C	167000	-0.01282	0.003971	0.001247	0.001933
0.003	Father_1886-1918	rs1286116	14	91409905	G	167000	-0.01354	0.004067	0.0008701	0.001385
0.003	Father_1886-1918	rs12881294	14	77449435	G	167000	-0.0163	0.004471	0.0002661	0.0004617
0.003	Father_1886-1918	rs12889970	14	90156773	A	167000	0.01378	0.004372	0.001621	0.002466
0.003	Father_1886-1918	rs13379416	14	50982983	A	167000	-0.01672	0.004856	0.0005754	0.0009435
0.003	Father_1886-1918	rs17095114	14	100083318	G	167000	0.01746	0.005617	0.001883	0.002834
0.003	Father_1886-1918	rs17103130	14	75774346	A	167000	0.02063	0.006409	0.001289	0.001993
0.003	Father_1886-1918	rs17103133	14	75783258	G	167000	0.01901	0.00573	0.0009071	0.001439
0.003	Father_1886-1918	rs17105506	14	37319638	C	166000	0.03065	0.008777	0.0004796	0.0007969
0.003	Father_1886-1918	rs17128948	14	74083901	A	167000	0.02399	0.007451	0.001286	0.001989
0.003	Father_1886-1918	rs17764956	14	80321084	C	167000	-0.01266	0.003907	0.00119	0.00185
0.003	Father_1886-1918	rs17767344	14	37437528	A	167000	-0.01783	0.005545	0.001303	0.002014
0.003	Father_1886-1918	rs1885185	14	89430335	A	167000	0.01312	0.003993	0.001019	0.001603
0.003	Father_1886-1918	rs1953892	14	51487004	A	167000	0.01251	0.00359	0.0004925	0.0008168
0.003	Father_1886-1918	rs1955914	14	90923749	G	167000	-0.01311	0.004056	0.001231	0.001911
0.003	Father_1886-1918	rs1958913	14	32512896	A	167000	0.01358	0.004189	0.001191	0.001852
0.003	Father_1886-1918	rs2071047	14	54418411	A	167000	-0.01364	0.003509	0.0001011	0.0001883
0.003	Father_1886-1918	rs2080577	14	77432572	A	167000	-0.01443	0.003733	0.0001108	0.000205
0.003	Father_1886-1918	rs2180954	14	33999041	C	167000	-0.01239	0.003621	0.0006216	0.001014
0.003	Father_1886-1918	rs2180955	14	34012842	A	167000	-0.01482	0.003629	4.418e-05	8.745e-05
0.003	Father_1886-1918	rs2185492	14	69765077	A	167000	-0.01153	0.003582	0.001292	0.001999
0.003	Father_1886-1918	rs222616	14	24120270	G	167000	0.01282	0.003665	0.000468	0.000779
0.003	Father_1886-1918	rs2239219	14	72852820	G	167000	-0.01159	0.003454	0.0007966	0.001276
0.003	Father_1886-1918	rs2239223	14	72849509	A	165000	-0.01112	0.003509	0.001537	0.002347
0.003	Father_1886-1918	rs2378956	14	32509543	C	167000	0.01304	0.004173	0.001785	0.002696
0.003	Father_1886-1918	rs2693694	14	99679775	G	167000	-0.01426	0.00394	0.0002963	0.00051
0.003	Father_1886-1918	rs3748318	14	94853497	G	167000	0.01672	0.004813	0.0005116	0.0008461
0.003	Father_1886-1918	rs3920038	14	52535648	C	167000	-0.01656	0.005166	0.001349	0.002079
0.003	Father_1886-1918	rs4144433	14	51750412	C	167000	0.01884	0.005106	0.0002249	0.0003949
0.003	Father_1886-1918	rs4145675	14	24122667	G	167000	0.0157	0.00386	4.765e-05	9.379e-05
0.003	Father_1886-1918	rs4640079	14	32438841	A	167000	-0.01219	0.003775	0.001246	0.001932
0.003	Father_1886-1918	rs4904510	14	89593013	G	167000	-0.01486	0.004458	0.0008583	0.001367
0.003	Father_1886-1918	rs4905373	14	42656202	A	167000	-0.01873	0.005889	0.001467	0.002247
0.003	Father_1886-1918	rs4905893	14	100233622	G	167000	0.04164	0.01164	0.0003458	0.0005884
0.003	Father_1886-1918	rs4981146	14	32454372	G	165000	-0.01266	0.003931	0.001284	0.001986
0.003	Father_1886-1918	rs4981950	14	32501255	A	167000	0.01397	0.003481	5.977e-05	0.0001157
0.003	Father_1886-1918	rs4983165	14	26848681	G	166000	-0.02547	0.008034	0.001524	0.002329
0.003	Father_1886-1918	rs7140434	14	56080708	C	167000	0.03866	0.0123	0.00167	0.002535
0.003	Father_1886-1918	rs741099	14	90915946	G	167000	0.01151	0.003564	0.001238	0.00192
0.003	Father_1886-1918	rs8006730	14	87486339	G	167000	-0.01188	0.003757	0.001572	0.002397
0.003	Father_1886-1918	rs8007279	14	75780766	A	167000	-0.01793	0.0051	0.000438	0.0007326
0.003	Father_1886-1918	rs8008967	14	73276126	A	167000	-0.01295	0.003856	0.0007877	0.001263
0.003	Father_1886-1918	rs808241	14	58364863	G	167000	0.01197	0.003506	0.0006383	0.001039
0.003	Father_1886-1918	rs861928	14	37391570	G	166000	-0.02925	0.009227	0.001524	0.002328
0.003	Father_1886-1918	rs917284	14	72737111	C	167000	-0.01141	0.003499	0.001114	0.001741
0.003	Father_1886-1918	rs941521	14	99708876	G	167000	-0.01131	0.003483	0.001165	0.001815
0.003	Father_1886-1918	rs10518870	15	57017888	A	167000	-0.01116	0.003486	0.001369	0.002108
0.003	Father_1886-1918	rs1106926	15	48218411	A	167000	-0.01426	0.00452	0.001603	0.00244
0.003	Father_1886-1918	rs11633223	15	78935476	G	164000	0.01279	0.003575	0.0003479	0.0005918
0.003	Father_1886-1918	rs11635285	15	32062580	G	166000	-0.01255	0.004051	0.001957	0.002938
0.003	Father_1886-1918	rs11858379	15	31947951	G	167000	-0.01608	0.004073	7.912e-05	0.00015
0.003	Father_1886-1918	rs12185122	15	27200942	G	167000	-0.01171	0.00378	0.001947	0.002923
0.003	Father_1886-1918	rs12911234	15	26193378	G	166000	-0.01114	0.003472	0.00134	0.002067
0.003	Father_1886-1918	rs1394371	15	78724469	A	167000	-0.01543	0.003818	5.345e-05	0.0001043
0.003	Father_1886-1918	rs1477475	15	57052269	C	166000	-0.01105	0.003556	0.001898	0.002855
0.003	Father_1886-1918	rs1670202	15	99687831	A	167000	-0.02254	0.007249	0.001872	0.002819
0.003	Father_1886-1918	rs16961815	15	49190560	C	167000	0.0333	0.01071	0.001873	0.00282
0.003	Father_1886-1918	rs1807198	15	96878294	G	167000	-0.0167	0.004051	3.736e-05	7.488e-05
0.003	Father_1886-1918	rs2117550	15	62877406	A	166000	-0.01657	0.00447	0.0002097	0.0003702
0.003	Father_1886-1918	rs2170878	15	81014981	A	167000	0.01933	0.006014	0.001311	0.002025
0.003	Father_1886-1918	rs2219507	15	31859635	A	161000	-0.01832	0.004265	1.74e-05	3.69e-05
0.003	Father_1886-1918	rs2866604	15	80584674	G	141000	-0.01875	0.004975	0.0001634	0.0002937
0.003	Father_1886-1918	rs3803457	15	56923536	A	167000	-0.01146	0.003528	0.001163	0.001812
0.003	Father_1886-1918	rs389480	15	91351930	A	167000	0.01163	0.003476	0.0008209	0.001312
0.003	Father_1886-1918	rs4646687	15	101448783	A	167000	0.01139	0.003632	0.001712	0.002595
0.003	Father_1886-1918	rs4776188	15	54207647	G	166000	-0.01224	0.003826	0.001381	0.002125
0.003	Father_1886-1918	rs4779824	15	31404294	A	167000	-0.01239	0.003556	0.0004946	0.00082
0.003	Father_1886-1918	rs4779910	15	31947042	A	167000	-0.01561	0.004216	0.0002133	0.000376
0.003	Father_1886-1918	rs522358	15	58067373	G	142000	-0.01389	0.004165	0.0008548	0.001362
0.003	Father_1886-1918	rs7163555	15	58808079	C	167000	-0.01577	0.004976	0.001529	0.002336
0.003	Father_1886-1918	rs7164188	15	32086180	G	165000	-0.01451	0.004046	0.0003355	0.0005723
0.003	Father_1886-1918	rs7170060	15	31897837	G	166000	-0.01672	0.004386	0.0001382	0.0002516
0.003	Father_1886-1918	rs7172930	15	58601804	A	167000	-0.01833	0.005109	0.0003341	0.00057
0.003	Father_1886-1918	rs7181405	15	78948152	G	167000	0.01341	0.003578	0.0001783	0.0003184
0.003	Father_1886-1918	rs8023462	15	78914734	G	167000	0.01206	0.003577	0.0007483	0.001204
0.003	Father_1886-1918	rs8024755	15	58691869	A	167000	0.02222	0.00616	0.0003089	0.00053
0.003	Father_1886-1918	rs8025603	15	94919347	A	167000	0.01226	0.003796	0.001235	0.001917
0.003	Father_1886-1918	rs8026050	15	45142419	G	167000	-0.02531	0.007479	0.0007134	0.001152
0.003	Father_1886-1918	rs8033159	15	53014003	A	167000	-0.01269	0.00352	0.0003142	0.0005384
0.003	Father_1886-1918	rs899086	15	66418338	G	167000	-0.01206	0.003711	0.001162	0.00181
0.003	Father_1886-1918	rs905432	15	32067075	A	165000	-0.0123	0.003954	0.001871	0.002817
0.003	Father_1886-1918	rs931794	15	78826180	G	167000	-0.01354	0.00363	0.0001915	0.0003403
0.003	Father_1886-1918	rs935214	15	58554685	A	167000	-0.01828	0.005815	0.001674	0.00254
0.003	Father_1886-1918	rs9806552	15	96978121	G	167000	0.01213	0.003854	0.001655	0.002514
0.003	Father_1886-1918	rs10852521	16	53804965	A	167000	0.01488	0.003459	1.699e-05	3.61e-05
0.003	Father_1886-1918	rs10863210	16	86405343	A	167000	-0.02782	0.008251	0.0007465	0.001201
0.003	Father_1886-1918	rs11644674	16	77925989	G	167000	-0.0115	0.00353	0.001124	0.001756
0.003	Father_1886-1918	rs12051478	16	20964318	A	167000	-0.02272	0.006434	0.0004134	0.0006944
0.003	Father_1886-1918	rs12922698	16	50848973	A	167000	0.01346	0.004268	0.001617	0.002461
0.003	Father_1886-1918	rs12926084	16	20867672	G	167000	-0.02236	0.006717	0.0008722	0.001388
0.003	Father_1886-1918	rs12929546	16	20981162	G	167000	-0.01833	0.005821	0.001637	0.002488
0.003	Father_1886-1918	rs1641894	16	12633875	A	167000	-0.0148	0.004647	0.001448	0.00222
0.003	Father_1886-1918	rs16949403	16	51197473	G	167000	-0.02401	0.007352	0.00109	0.001707
0.003	Father_1886-1918	rs16953243	16	54274354	C	167000	0.01441	0.004316	0.0008413	0.001342
0.003	Father_1886-1918	rs16958988	16	83007449	A	167000	0.01296	0.003907	0.0009056	0.001437
0.003	Father_1886-1918	rs17253832	16	54274562	G	167000	0.01759	0.005145	0.0006291	0.001025
0.003	Father_1886-1918	rs17624394	16	77742967	A	167000	0.01967	0.006121	0.001312	0.002027
0.003	Father_1886-1918	rs17682789	16	83014734	G	167000	0.01338	0.003802	0.0004336	0.0007259
0.003	Father_1886-1918	rs1992623	16	86645780	A	167000	0.01176	0.003752	0.001722	0.002608
0.003	Father_1886-1918	rs2030980	16	5274364	G	167000	-0.01552	0.003681	2.465e-05	5.095e-05
0.003	Father_1886-1918	rs2112494	16	21045369	G	166000	-0.01893	0.005895	0.001318	0.002035
0.003	Father_1886-1918	rs2279867	16	10669802	G	167000	-0.02605	0.006927	0.0001691	0.0003033
0.003	Father_1886-1918	rs2347000	16	26617645	A	167000	0.01556	0.004087	0.0001406	0.0002556
0.003	Father_1886-1918	rs234993	16	20647644	G	167000	-0.02105	0.005985	0.0004354	0.0007285
0.003	Father_1886-1918	rs2729613	16	73888597	A	167000	-0.01099	0.003477	0.001575	0.0024
0.003	Father_1886-1918	rs2738622	16	78715586	A	167000	-0.01637	0.004621	0.0003959	0.0006671
0.003	Father_1886-1918	rs2764790	16	20099261	A	167000	-0.01376	0.00397	0.0005285	0.000872
0.003	Father_1886-1918	rs2911275	16	81594955	A	167000	0.01391	0.004162	0.0008328	0.001329
0.003	Father_1886-1918	rs2962459	16	62854585	G	167000	0.01286	0.003672	0.0004641	0.000773
0.003	Father_1886-1918	rs328319	16	73875786	A	167000	-0.01389	0.003527	8.166e-05	0.0001545
0.003	Father_1886-1918	rs328346	16	73851445	A	167000	-0.01113	0.003569	0.001811	0.002733
0.003	Father_1886-1918	rs3785028	16	84136622	A	166000	-0.01288	0.00399	0.001244	0.001929
0.003	Father_1886-1918	rs3785216	16	7713351	G	167000	0.01589	0.005069	0.001719	0.002604
0.003	Father_1886-1918	rs3785290	16	456483	A	167000	-0.0113	0.003524	0.001341	0.002068
0.003	Father_1886-1918	rs425594	16	73867002	A	166000	0.01226	0.003949	0.001912	0.002875
0.003	Father_1886-1918	rs4392054	16	20722770	A	167000	-0.02137	0.006258	0.0006376	0.001038
0.003	Father_1886-1918	rs4784448	16	55021747	A	167000	0.01674	0.005317	0.00164	0.002493
0.003	Father_1886-1918	rs4888159	16	81646894	A	167000	0.01102	0.003505	0.001664	0.002526
0.003	Father_1886-1918	rs7190492	16	53828752	A	166000	0.01136	0.003586	0.001533	0.002341
0.003	Father_1886-1918	rs9302798	16	5281427	G	166000	-0.012	0.003598	0.0008558	0.001363
0.003	Father_1886-1918	rs9937350	16	81307584	G	167000	0.01226	0.003814	0.001304	0.002016
0.003	Father_1886-1918	rs9940215	16	7758406	A	165000	0.01271	0.003619	0.0004426	0.0007398
0.003	Father_1886-1918	rs1052586	17	45018463	G	165000	0.01106	0.003502	0.001596	0.00243
0.003	Father_1886-1918	rs1054083	17	908529	A	167000	0.01497	0.004731	0.001558	0.002377
0.003	Father_1886-1918	rs11079310	17	55684642	G	167000	0.01442	0.004532	0.001465	0.002244
0.003	Father_1886-1918	rs11868220	17	53563262	G	167000	0.01291	0.003588	0.0003223	0.0005513
0.003	Father_1886-1918	rs12325826	17	21469411	A	167000	0.05326	0.01702	0.00175	0.002648
0.003	Father_1886-1918	rs12453858	17	66659442	A	167000	-0.01646	0.005198	0.001538	0.002349
0.003	Father_1886-1918	rs12602832	17	42396896	A	167000	-0.02163	0.00609	0.0003835	0.0006477
0.003	Father_1886-1918	rs12937209	17	51019829	C	167000	0.01181	0.003728	0.001536	0.002345
0.003	Father_1886-1918	rs12937250	17	10123564	A	166000	0.01429	0.004526	0.001599	0.002435
0.003	Father_1886-1918	rs12940265	17	62292399	A	167000	-0.01228	0.003459	0.0003865	0.0006524
0.003	Father_1886-1918	rs12943352	17	40808069	G	167000	0.01085	0.003483	0.001847	0.002783
0.003	Father_1886-1918	rs1838105	17	45008935	A	167000	-0.01133	0.003653	0.001924	0.002891
0.003	Father_1886-1918	rs1949194	17	51023365	G	167000	0.01464	0.004426	0.0009424	0.001491
0.003	Father_1886-1918	rs2072255	17	12852392	A	167000	-0.01904	0.006122	0.001867	0.002812
0.003	Father_1886-1918	rs2109019	17	59475888	A	167000	0.01366	0.004169	0.001053	0.001653
0.003	Father_1886-1918	rs2286528	17	59471372	A	167000	0.024	0.007639	0.001676	0.002544
0.003	Father_1886-1918	rs2290509	17	18145450	G	167000	-0.06904	0.0219	0.001618	0.002462
0.003	Father_1886-1918	rs2467261	17	787784	G	167000	-0.01216	0.003888	0.001762	0.002664
0.003	Father_1886-1918	rs364569	17	6979179	G	167000	0.01325	0.003651	0.0002841	0.0004905
0.003	Father_1886-1918	rs4404103	17	37682657	G	167000	-0.01969	0.005866	0.0007892	0.001265
0.003	Father_1886-1918	rs4609888	17	1861604	A	167000	-0.01431	0.004489	0.001431	0.002197
0.003	Father_1886-1918	rs4889843	17	78299319	G	166000	0.01075	0.003476	0.001986	0.002978
0.003	Father_1886-1918	rs8064606	17	51085295	A	167000	0.01366	0.004323	0.001574	0.0024
0.003	Father_1886-1918	rs8075367	17	53563973	A	167000	0.01275	0.003854	0.0009372	0.001483
0.003	Father_1886-1918	rs90951	17	6981397	G	166000	0.01218	0.003652	0.0008532	0.00136
0.003	Father_1886-1918	rs9904181	17	69368411	A	167000	-0.02023	0.006439	0.001678	0.002547
0.003	Father_1886-1918	rs1074347	18	9285892	A	167000	0.01402	0.003499	6.18e-05	0.0001193
0.003	Father_1886-1918	rs11152012	18	54993974	G	167000	-0.01799	0.005163	0.0004922	0.0008164
0.003	Father_1886-1918	rs11659850	18	14123806	A	167000	-0.01286	0.004134	0.001865	0.002808
0.003	Father_1886-1918	rs11874029	18	71015936	G	167000	-0.01757	0.004697	0.000183	0.0003263
0.003	Father_1886-1918	rs12455707	18	56598753	A	167000	0.01373	0.003751	0.0002529	0.0004403
0.003	Father_1886-1918	rs12953401	18	9095600	G	167000	0.01635	0.004889	0.0008227	0.001315
0.003	Father_1886-1918	rs12955541	18	49297179	G	167000	-0.02301	0.00718	0.001351	0.002083
0.003	Father_1886-1918	rs1379444	18	57923480	C	163000	0.0111	0.003502	0.001532	0.00234
0.003	Father_1886-1918	rs17088751	18	71739413	A	167000	-0.01962	0.00565	0.0005142	0.0008501
0.003	Father_1886-1918	rs17186875	18	20834307	A	167000	0.01514	0.004366	0.0005226	0.0008629
0.003	Father_1886-1918	rs17497377	18	9092233	C	166000	0.02717	0.006508	2.99e-05	6.092e-05
0.003	Father_1886-1918	rs17695084	18	56655950	A	167000	0.01218	0.003592	0.0006954	0.001125
0.003	Father_1886-1918	rs1785171	18	13571334	G	167000	-0.01391	0.00421	0.000951	0.001504
0.003	Father_1886-1918	rs1876368	18	11021540	A	167000	-0.01174	0.003465	0.0007068	0.001142
0.003	Father_1886-1918	rs1943406	18	54986641	A	167000	-0.02011	0.006388	0.001647	0.002502
0.003	Father_1886-1918	rs1979369	18	44191240	G	167000	-0.01472	0.00439	0.0008008	0.001282
0.003	Father_1886-1918	rs232319	18	24500151	A	167000	0.01077	0.003463	0.001867	0.002811
0.003	Father_1886-1918	rs2586204	18	18974738	A	167000	0.01448	0.004594	0.001627	0.002474
0.003	Father_1886-1918	rs269985	18	42785997	A	167000	0.01422	0.004489	0.001531	0.002339
0.003	Father_1886-1918	rs35054488	18	59759223	A	167000	0.0279	0.008623	0.001214	0.001886
0.003	Father_1886-1918	rs4377239	18	18877014	A	167000	0.01712	0.005172	0.0009352	0.00148
0.003	Father_1886-1918	rs4798049	18	307022	A	167000	0.01304	0.004013	0.001159	0.001806
0.003	Father_1886-1918	rs601239	18	6992271	A	167000	-0.01264	0.003739	0.0007233	0.001166
0.003	Father_1886-1918	rs644286	18	42428724	A	167000	0.01191	0.003724	0.001381	0.002126
0.003	Father_1886-1918	rs7239756	18	276848	G	165000	0.01435	0.003575	5.95e-05	0.0001152
0.003	Father_1886-1918	rs7240224	18	5066294	A	166000	0.01101	0.0035	0.001661	0.002523
0.003	Father_1886-1918	rs7242002	18	9318621	G	161000	0.01515	0.004593	0.0009733	0.001536
0.003	Father_1886-1918	rs8089693	18	9217537	A	167000	0.01335	0.003897	0.0006153	0.001004
0.003	Father_1886-1918	rs881433	18	42444473	A	167000	0.01208	0.003782	0.001404	0.002159
0.003	Father_1886-1918	rs948648	18	54758538	A	167000	-0.02112	0.006486	0.001132	0.001767
0.003	Father_1886-1918	rs9945133	18	29768609	G	167000	0.01159	0.003662	0.001553	0.00237
0.003	Father_1886-1918	rs9945789	18	42421259	A	167000	-0.02239	0.006768	0.00094	0.001487
0.003	Father_1886-1918	rs9948424	18	48233078	A	167000	0.01155	0.003652	0.001561	0.002381
0.003	Father_1886-1918	rs9960129	18	9234774	A	166000	0.01157	0.003557	0.001146	0.001788
0.003	Father_1886-1918	rs9965257	18	4944457	G	167000	-0.02089	0.006715	0.001864	0.002807
0.003	Father_1886-1918	rs1016994	19	36574475	A	167000	-0.02938	0.009382	0.001738	0.002631
0.003	Father_1886-1918	rs10402233	19	35780851	G	167000	-0.01302	0.003574	0.0002691	0.0004665
0.003	Father_1886-1918	rs10405599	19	986825	A	167000	0.01206	0.003761	0.001346	0.002076
0.003	Father_1886-1918	rs10407447	19	40869182	G	166000	-0.01626	0.00469	0.0005282	0.0008715
0.003	Father_1886-1918	rs1117941	19	35114578	G	166000	0.01547	0.004933	0.001719	0.002604
0.003	Father_1886-1918	rs1233444	19	44764064	A	167000	-0.01317	0.003666	0.0003284	0.000561
0.003	Father_1886-1918	rs1233454	19	44741827	A	167000	-0.02157	0.00508	2.177e-05	4.54e-05
0.003	Father_1886-1918	rs12609268	19	2939396	G	167000	0.02103	0.005349	8.446e-05	0.0001594
0.003	Father_1886-1918	rs12609974	19	55500215	G	167000	0.01157	0.003719	0.001861	0.002803
0.003	Father_1886-1918	rs20580	19	48654553	A	167000	-0.01276	0.003453	0.0002198	0.0003867
0.003	Father_1886-1918	rs2278444	19	10904700	G	167000	0.01401	0.003728	0.000172	0.0003081
0.003	Father_1886-1918	rs2288883	19	48636534	C	167000	-0.01393	0.003576	9.781e-05	0.0001826
0.003	Father_1886-1918	rs260424	19	58726569	A	163000	-0.02064	0.006254	0.0009656	0.001525
0.003	Father_1886-1918	rs260428	19	58736625	C	166000	-0.01993	0.005981	0.0008586	0.001368
0.003	Father_1886-1918	rs2900964	19	13552763	C	167000	-0.02538	0.006191	4.136e-05	8.228e-05
0.003	Father_1886-1918	rs3046	19	44124735	G	167000	-0.01279	0.003463	0.0002223	0.0003908
0.003	Father_1886-1918	rs304723	19	44102338	A	167000	-0.01256	0.003718	0.0007291	0.001175
0.003	Father_1886-1918	rs344569	19	6658636	A	166000	-0.0166	0.004492	0.0002197	0.0003865
0.003	Father_1886-1918	rs3745216	19	41249508	A	167000	0.01143	0.003462	0.0009633	0.001522
0.003	Father_1886-1918	rs3764570	19	8528277	G	167000	-0.01207	0.003808	0.00152	0.002323
0.003	Father_1886-1918	rs3817	19	44090195	A	167000	-0.01225	0.003471	0.0004171	0.0007001
0.003	Father_1886-1918	rs3865452	19	41211056	G	167000	-0.01136	0.003462	0.001032	0.001622
0.003	Father_1886-1918	rs4806077	19	35577163	A	167000	-0.01384	0.004225	0.001054	0.001654
0.003	Father_1886-1918	rs526251	19	34591660	A	160000	-0.01186	0.003598	0.0009803	0.001546
0.003	Father_1886-1918	rs6508937	19	40843127	G	166000	0.0209	0.006624	0.001607	0.002446
0.003	Father_1886-1918	rs6511720	19	11202306	A	167000	0.02336	0.005316	1.108e-05	2.43e-05
0.003	Father_1886-1918	rs7249146	19	40853492	G	167000	-0.01307	0.003718	0.0004402	0.000736
0.003	Father_1886-1918	rs7254653	19	2907650	G	167000	-0.04273	0.01252	0.0006393	0.00104
0.003	Father_1886-1918	rs7257602	19	41224898	G	167000	-0.01083	0.003462	0.001757	0.002657
0.003	Father_1886-1918	rs7258189	19	11169947	G	167000	0.01213	0.003597	0.0007499	0.001206
0.003	Father_1886-1918	rs769449	19	45410002	A	164000	-0.01849	0.005591	0.0009439	0.001493
0.003	Father_1886-1918	rs8101923	19	5555781	A	167000	0.01227	0.00366	0.000802	0.001284
0.003	Father_1886-1918	rs8109759	19	46949662	G	167000	0.01367	0.003873	0.0004153	0.0006974
0.003	Father_1886-1918	rs8112032	19	35724764	A	167000	0.01301	0.003972	0.001057	0.001659
0.003	Father_1886-1918	rs8887	19	4502201	A	167000	-0.01089	0.003487	0.001789	0.002702
0.003	Father_1886-1918	rs1002382	1	210312760	G	167000	-0.01081	0.003468	0.001821	0.002748
0.003	Father_1886-1918	rs10157390	1	162247296	C	167000	0.01168	0.003619	0.001253	0.001942
0.003	Father_1886-1918	rs10430083	1	107316651	G	166000	-0.01262	0.003627	0.0005055	0.0008368
0.003	Father_1886-1918	rs10489667	1	114837021	G	167000	0.01283	0.003873	0.0009226	0.001462
0.003	Father_1886-1918	rs10493173	1	53771202	G	167000	-0.01801	0.005375	0.0008066	0.001291
0.003	Father_1886-1918	rs10494103	1	109674281	G	166000	-0.02235	0.007137	0.001734	0.002625
0.003	Father_1886-1918	rs1059595	1	231658301	G	167000	-0.01679	0.00491	0.0006268	0.001021
0.003	Father_1886-1918	rs10799723	1	22310080	G	167000	-0.06468	0.01977	0.00107	0.001678
0.003	Father_1886-1918	rs10801741	1	89921575	G	167000	0.01363	0.003584	0.0001434	0.0002604
0.003	Father_1886-1918	rs10874286	1	82562877	A	167000	0.0112	0.003623	0.001996	0.002991
0.003	Father_1886-1918	rs10874521	1	102312848	G	167000	0.01169	0.003753	0.001837	0.002769
0.003	Father_1886-1918	rs10907371	1	147803005	C	166000	0.01291	0.004148	0.001859	0.0028
0.003	Father_1886-1918	rs10912983	1	175421100	G	167000	0.01339	0.003643	0.0002372	0.0004149
0.003	Father_1886-1918	rs10915433	1	4014091	G	142000	0.02601	0.008117	0.001357	0.002091
0.003	Father_1886-1918	rs10919060	1	162252870	G	167000	0.01247	0.003889	0.001351	0.002083
0.003	Father_1886-1918	rs11117584	1	216632415	A	167000	0.01355	0.004034	0.0007794	0.00125
0.003	Father_1886-1918	rs11260549	1	1121794	A	167000	-0.01946	0.005347	0.000273	0.0004726
0.003	Father_1886-1918	rs11264262	1	154756589	G	167000	0.01841	0.005518	0.0008474	0.001351
0.003	Father_1886-1918	rs11264546	1	156743173	A	167000	-0.01206	0.003503	0.0005755	0.0009437
0.003	Father_1886-1918	rs11580294	1	209839374	A	167000	-0.0146	0.004281	0.0006475	0.001053
0.003	Father_1886-1918	rs11802935	1	233928550	G	167000	0.01105	0.003491	0.001544	0.002358
0.003	Father_1886-1918	rs12023595	1	107180296	A	167000	-0.01263	0.003493	0.0002977	0.0005123
0.003	Father_1886-1918	rs12032278	1	244369276	A	167000	-0.03413	0.01104	0.001991	0.002984
0.003	Father_1886-1918	rs12039141	1	243147031	G	167000	0.01411	0.003813	0.0002141	0.0003773
0.003	Father_1886-1918	rs12039210	1	108549532	A	162000	-0.02416	0.007157	0.0007381	0.001189
0.003	Father_1886-1918	rs12090855	1	28874969	A	167000	0.03602	0.01053	0.0006266	0.001021
0.003	Father_1886-1918	rs12120788	1	157237374	A	167000	-0.01185	0.003484	0.0006734	0.001092
0.003	Father_1886-1918	rs12130232	1	157259119	G	167000	-0.01378	0.003682	0.0001815	0.0003238
0.003	Father_1886-1918	rs12136630	1	171833688	A	167000	0.01864	0.005475	0.0006627	0.001076
0.003	Father_1886-1918	rs12140193	1	171766580	C	167000	0.01838	0.004904	0.0001776	0.0003174
0.003	Father_1886-1918	rs12407200	1	184319293	A	167000	0.01143	0.003462	0.0009593	0.001516
0.003	Father_1886-1918	rs12565878	1	175411978	G	167000	0.01464	0.004092	0.0003465	0.0005896
0.003	Father_1886-1918	rs12742393	1	162224586	A	167000	0.01097	0.003508	0.001755	0.002655
0.003	Father_1886-1918	rs12750774	1	154516477	A	167000	0.01219	0.003742	0.00112	0.00175
0.003	Father_1886-1918	rs12754974	1	184215054	G	167000	0.01325	0.004148	0.0014	0.002152
0.003	Father_1886-1918	rs1288497	1	53762189	A	167000	-0.01958	0.00503	9.932e-05	0.0001852
0.003	Father_1886-1918	rs1341645	1	95108162	A	167000	-0.01233	0.003705	0.0008748	0.001391
0.003	Father_1886-1918	rs1387815	1	212277107	C	167000	-0.01084	0.003504	0.001982	0.002972
0.003	Father_1886-1918	rs1416282	1	157223575	A	167000	-0.01483	0.004024	0.0002291	0.0004017
0.003	Father_1886-1918	rs1506982	1	154753697	C	167000	0.02344	0.006306	0.0002014	0.0003566
0.003	Father_1886-1918	rs16859591	1	233927721	G	166000	-0.01154	0.00361	0.001385	0.002131
0.003	Father_1886-1918	rs17096897	1	59379043	G	165000	-0.01589	0.004913	0.001221	0.001895
0.003	Father_1886-1918	rs17129664	1	67583298	A	167000	0.01952	0.006028	0.001206	0.001875
0.003	Father_1886-1918	rs17399998	1	3305016	A	167000	-0.01422	0.004196	0.0007027	0.001136
0.003	Father_1886-1918	rs17540656	1	115880132	G	167000	-0.0108	0.003478	0.001899	0.002856
0.003	Father_1886-1918	rs1778196	1	95110225	A	167000	-0.01525	0.004808	0.001519	0.002322
0.003	Father_1886-1918	rs182358	1	97463150	G	167000	-0.01112	0.003451	0.001272	0.001969
0.003	Father_1886-1918	rs2050701	1	183281919	G	167000	0.01396	0.003736	0.000186	0.0003312
0.003	Father_1886-1918	rs2130151	1	164293400	A	167000	-0.01345	0.003878	0.0005231	0.0008638
0.003	Father_1886-1918	rs2301472	1	20498914	A	166000	0.01627	0.005162	0.001618	0.002462
0.003	Father_1886-1918	rs2312236	1	166794217	A	167000	0.01954	0.005786	0.0007342	0.001183
0.003	Father_1886-1918	rs2335230	1	154589628	C	167000	-0.01461	0.004274	0.0006284	0.001024
0.003	Father_1886-1918	rs2364813	1	112082365	G	167000	-0.02498	0.007439	0.000787	0.001262
0.003	Father_1886-1918	rs2483225	1	3325037	A	166000	0.01101	0.003474	0.001527	0.002333
0.003	Father_1886-1918	rs2644608	1	156774029	G	167000	-0.01378	0.003463	6.924e-05	0.0001326
0.003	Father_1886-1918	rs2782500	1	53764635	A	165000	-0.01852	0.005001	0.0002132	0.0003759
0.003	Father_1886-1918	rs2788045	1	183384796	G	165000	0.01283	0.003718	0.0005559	0.0009138
0.003	Father_1886-1918	rs2788056	1	183400890	A	167000	0.01424	0.003752	0.0001468	0.000266
0.003	Father_1886-1918	rs2791390	1	245957828	A	167000	0.01261	0.003596	0.0004547	0.0007585
0.003	Father_1886-1918	rs2802022	1	90461348	A	167000	-0.01895	0.00599	0.001558	0.002377
0.003	Father_1886-1918	rs2808477	1	200300299	G	167000	-0.0119	0.003679	0.001214	0.001885
0.003	Father_1886-1918	rs2819493	1	227689829	A	155000	-0.01209	0.003732	0.001195	0.001858
0.003	Father_1886-1918	rs2877978	1	183496658	G	166000	0.01421	0.003674	0.0001095	0.0002027
0.003	Father_1886-1918	rs2946534	1	18774783	C	167000	-0.01259	0.003481	0.0002978	0.0005124
0.003	Father_1886-1918	rs2970578	1	212098460	C	167000	-0.01246	0.003522	0.0004042	0.0006801
0.003	Father_1886-1918	rs2995762	1	112918545	A	167000	-0.01289	0.003521	0.0002508	0.0004369
0.003	Father_1886-1918	rs3104205	1	152095083	A	164000	-0.02968	0.008813	0.0007593	0.00122
0.003	Father_1886-1918	rs338564	1	184777079	A	167000	-0.0153	0.004368	0.0004612	0.0007685
0.003	Father_1886-1918	rs359941	1	89976988	A	166000	-0.01264	0.003753	0.000756	0.001215
0.003	Father_1886-1918	rs3765787	1	156754465	A	167000	0.01317	0.003948	0.0008476	0.001351
0.003	Father_1886-1918	rs3889240	1	99601609	C	167000	0.02039	0.006161	0.0009358	0.001481
0.003	Father_1886-1918	rs4298709	1	162236582	G	167000	0.01131	0.00349	0.001186	0.001846
0.003	Father_1886-1918	rs432803	1	40809669	A	165000	-0.01161	0.003722	0.001817	0.002742
0.003	Father_1886-1918	rs4431825	1	162210471	A	167000	0.01082	0.003484	0.001904	0.002863
0.003	Father_1886-1918	rs4553122	1	24927561	A	167000	-0.01294	0.003466	0.0001899	0.0003377
0.003	Father_1886-1918	rs4661061	1	156802657	A	167000	0.01425	0.003932	0.0002905	0.0005006
0.003	Father_1886-1918	rs4845671	1	154755126	A	167000	0.01179	0.003645	0.001223	0.001899
0.003	Father_1886-1918	rs4916263	1	172450689	A	167000	-0.01457	0.003701	8.249e-05	0.000156
0.003	Father_1886-1918	rs4916266	1	172450795	A	167000	0.01208	0.003515	0.000589	0.0009642
0.003	Father_1886-1918	rs499689	1	229565732	G	167000	0.01236	0.003527	0.0004553	0.0007595
0.003	Father_1886-1918	rs535988	1	164280278	A	167000	-0.01382	0.003813	0.0002905	0.0005006
0.003	Father_1886-1918	rs599839	1	109822166	G	166000	0.01405	0.004128	0.0006641	0.001078
0.003	Father_1886-1918	rs611060	1	109782190	A	167000	0.01175	0.003516	0.0008362	0.001335
0.003	Father_1886-1918	rs6424272	1	233191368	A	166000	0.01393	0.004032	0.0005502	0.0009052
0.003	Father_1886-1918	rs6429530	1	245345109	A	167000	-0.01974	0.005338	0.0002173	0.0003825
0.003	Father_1886-1918	rs6540546	1	209845370	G	167000	-0.013	0.003862	0.0007591	0.00122
0.003	Father_1886-1918	rs6588010	1	63634135	A	167000	0.01674	0.005033	0.0008797	0.001399
0.003	Father_1886-1918	rs6588634	1	56938218	G	167000	0.01753	0.005586	0.001705	0.002585
0.003	Father_1886-1918	rs6663578	1	57068107	G	166000	0.01287	0.00351	0.0002444	0.0004265
0.003	Father_1886-1918	rs6666204	1	4423272	A	167000	-0.01899	0.006109	0.001878	0.002827
0.003	Father_1886-1918	rs6666777	1	175391741	A	167000	0.01705	0.004479	0.0001413	0.0002567
0.003	Father_1886-1918	rs6671420	1	2338879	G	167000	-0.01316	0.004109	0.001364	0.002101
0.003	Father_1886-1918	rs6677772	1	107041174	A	167000	-0.01382	0.003832	0.0003097	0.0005312
0.003	Father_1886-1918	rs6681468	1	16079818	C	167000	0.02263	0.006916	0.001069	0.001676
0.003	Father_1886-1918	rs6682568	1	157263272	G	167000	-0.01212	0.003542	0.0006245	0.001018
0.003	Father_1886-1918	rs6682580	1	89876211	A	167000	0.02221	0.006586	0.0007443	0.001198
0.003	Father_1886-1918	rs6690935	1	34260948	A	167000	0.02009	0.006083	0.0009604	0.001517
0.003	Father_1886-1918	rs6691993	1	172426998	C	167000	0.01139	0.003461	0.001003	0.00158
0.003	Father_1886-1918	rs6692501	1	89935101	A	167000	0.01388	0.003579	0.000105	0.000195
0.003	Father_1886-1918	rs6695322	1	233193800	A	167000	0.01582	0.004666	0.0007002	0.001132
0.003	Father_1886-1918	rs6697704	1	107162694	G	164000	0.01216	0.003573	0.0006641	0.001078
0.003	Father_1886-1918	rs682331	1	184761365	G	167000	-0.0133	0.003474	0.0001285	0.0002351
0.003	Father_1886-1918	rs737524	1	27180829	C	167000	-0.01098	0.003512	0.001762	0.002665
0.003	Father_1886-1918	rs7515411	1	200259607	G	141000	-0.01247	0.004014	0.001888	0.002841
0.003	Father_1886-1918	rs7518199	1	154407419	C	167000	0.01151	0.003519	0.001073	0.001681
0.003	Father_1886-1918	rs7529327	1	32032752	A	157000	-0.07809	0.02429	0.001303	0.002014
0.003	Father_1886-1918	rs7548924	1	35095368	A	167000	0.01393	0.004068	0.0006178	0.001008
0.003	Father_1886-1918	rs7551242	1	172445883	G	167000	-0.01376	0.003872	0.0003789	0.0006406
0.003	Father_1886-1918	rs846906	1	209887718	A	166000	-0.01496	0.004739	0.001592	0.002426
0.003	Father_1886-1918	rs861620	1	184757199	A	167000	-0.01432	0.003568	5.993e-05	0.000116
0.003	Father_1886-1918	rs953559	1	154769201	G	166000	0.02067	0.005671	0.0002675	0.0004638
0.003	Father_1886-1918	rs962793	1	199034906	G	165000	-0.01263	0.003717	0.0006781	0.001099
0.003	Father_1886-1918	rs1361051	20	54238237	G	167000	0.01123	0.003497	0.001321	0.002039
0.003	Father_1886-1918	rs1412955	20	45552175	G	167000	0.0215	0.006656	0.001236	0.001918
0.003	Father_1886-1918	rs16983329	20	22035197	A	154000	-0.03026	0.009476	0.001408	0.002163
0.003	Father_1886-1918	rs1884712	20	37914526	A	167000	-0.01451	0.004284	0.0007089	0.001145
0.003	Father_1886-1918	rs209901	20	37746454	A	167000	0.01403	0.003692	0.0001439	0.0002611
0.003	Father_1886-1918	rs2236194	20	61879009	A	164000	-0.01488	0.00471	0.001582	0.00241
0.003	Father_1886-1918	rs348784	20	59058168	A	167000	0.01547	0.004567	0.0007055	0.00114
0.003	Father_1886-1918	rs3787435	20	60837747	A	167000	0.02246	0.006235	0.0003148	0.0005395
0.003	Father_1886-1918	rs404678	20	5024237	G	167000	0.01248	0.003573	0.0004788	0.0007957
0.003	Father_1886-1918	rs4911375	20	32516022	C	167000	0.01148	0.003672	0.001766	0.00267
0.003	Father_1886-1918	rs6012061	20	45506829	A	167000	0.03371	0.008513	7.503e-05	0.0001428
0.003	Father_1886-1918	rs6018954	20	36132946	G	167000	0.0129	0.004068	0.001523	0.002327
0.003	Father_1886-1918	rs6035261	20	19216528	G	167000	0.01189	0.003465	0.0006004	0.0009815
0.003	Father_1886-1918	rs6038447	20	687401	C	167000	-0.01147	0.003595	0.001415	0.002174
0.003	Father_1886-1918	rs6049829	20	24629040	G	167000	0.0123	0.003473	0.0003987	0.0006715
0.003	Father_1886-1918	rs6054210	20	691821	A	167000	-0.01689	0.005233	0.001246	0.001932
0.003	Father_1886-1918	rs6064592	20	56355547	G	167000	-0.0155	0.004563	0.0006816	0.001104
0.003	Father_1886-1918	rs6065944	20	44900733	A	167000	-0.01269	0.004018	0.00159	0.002422
0.003	Father_1886-1918	rs6066059	20	45368154	G	167000	0.0118	0.003791	0.001854	0.002793
0.003	Father_1886-1918	rs6076834	20	5425688	A	167000	-0.01327	0.003971	0.0008317	0.001328
0.003	Father_1886-1918	rs6081694	20	19631263	A	167000	-0.01803	0.004997	0.0003093	0.0005307
0.003	Father_1886-1918	rs6085146	20	5380846	A	167000	-0.01216	0.003866	0.001657	0.002517
0.003	Father_1886-1918	rs6089510	20	60377424	A	167000	0.01163	0.003604	0.001253	0.001942
0.003	Father_1886-1918	rs6110333	20	14548676	A	166000	0.03237	0.009965	0.001161	0.00181
0.003	Father_1886-1918	rs6112257	20	19195319	G	167000	-0.01168	0.003739	0.001785	0.002697
0.003	Father_1886-1918	rs6131656	20	15259803	A	167000	0.02621	0.008182	0.001359	0.002093
0.003	Father_1886-1918	rs6142047	20	32514386	G	167000	0.01364	0.003466	8.338e-05	0.0001575
0.003	Father_1886-1918	rs997505	20	8778366	A	167000	0.05036	0.01607	0.001728	0.002617
0.003	Father_1886-1918	rs12152004	21	36711790	C	164000	-0.01313	0.003703	0.0003895	0.0006571
0.003	Father_1886-1918	rs12483016	21	16546125	A	167000	-0.01296	0.004178	0.001914	0.002877
0.003	Father_1886-1918	rs221956	21	43606997	A	167000	0.0125	0.003795	0.0009876	0.001557
0.003	Father_1886-1918	rs2236449	21	46702506	A	167000	-0.01311	0.003678	0.0003644	0.0006178
0.003	Father_1886-1918	rs225329	21	43763726	G	166000	0.01445	0.003827	0.0001598	0.0002878
0.003	Father_1886-1918	rs225352	21	43777432	A	167000	0.02721	0.006344	1.794e-05	3.797e-05
0.003	Father_1886-1918	rs225439	21	43731405	A	167000	-0.01276	0.00346	0.0002262	0.0003971
0.003	Father_1886-1918	rs2297259	21	41450573	A	167000	0.02159	0.006104	0.0004053	0.0006817
0.003	Father_1886-1918	rs2297284	21	46705345	A	167000	-0.01301	0.003938	0.0009513	0.001504
0.003	Father_1886-1918	rs2823324	21	16895833	A	167000	-0.04547	0.0127	0.000344	0.0005857
0.003	Father_1886-1918	rs2828541	21	25187933	A	167000	-0.02149	0.006396	0.0007821	0.001254
0.003	Father_1886-1918	rs2832337	21	30832471	G	167000	0.01758	0.005155	0.0006506	0.001057
0.003	Father_1886-1918	rs2833505	21	33158962	G	167000	-0.01091	0.00349	0.001778	0.002687
0.003	Father_1886-1918	rs2834911	21	36702489	A	167000	-0.01283	0.003869	0.0009178	0.001455
0.003	Father_1886-1918	rs2835951	21	39145172	G	166000	0.01154	0.003523	0.001055	0.001656
0.003	Father_1886-1918	rs2836437	21	39864584	G	167000	0.01381	0.004442	0.001875	0.002822
0.003	Father_1886-1918	rs2838860	21	46684904	G	167000	-0.01271	0.003581	0.0003881	0.000655
0.003	Father_1886-1918	rs2838861	21	46686619	A	167000	-0.01255	0.003617	0.0005185	0.0008567
0.003	Father_1886-1918	rs2839127	21	47573550	A	167000	-0.01618	0.004597	0.0004325	0.0007241
0.003	Father_1886-1918	rs4407340	21	43599745	C	167000	0.02082	0.006177	0.00075	0.001206
0.003	Father_1886-1918	rs480449	21	43740749	G	167000	-0.01126	0.003459	0.001131	0.001766
0.003	Father_1886-1918	rs4818975	21	46191256	A	167000	-0.01128	0.003488	0.001222	0.001897
0.003	Father_1886-1918	rs4819035	21	46645715	C	167000	-0.01279	0.003856	0.0009087	0.001441
0.003	Father_1886-1918	rs6518204	21	46187385	A	167000	-0.01215	0.003685	0.0009747	0.001538
0.003	Father_1886-1918	rs668058	21	44786539	A	167000	-0.01262	0.003855	0.001063	0.001667
0.003	Father_1886-1918	rs681210	21	44779343	A	167000	-0.0128	0.003714	0.0005654	0.0009283
0.003	Father_1886-1918	rs7277753	21	33612833	G	167000	0.0134	0.004188	0.00138	0.002124
0.003	Father_1886-1918	rs7283833	21	27618726	A	162000	0.0112	0.00357	0.001699	0.002576
0.003	Father_1886-1918	rs914215	21	46698256	G	166000	-0.0126	0.00364	0.0005397	0.0008892
0.003	Father_1886-1918	rs9975938	21	42089378	G	167000	-0.01688	0.004685	0.0003163	0.0005419
0.003	Father_1886-1918	rs9982652	21	29915806	A	167000	-0.02254	0.00723	0.00182	0.002746
0.003	Father_1886-1918	rs1018744	22	24249091	A	167000	0.01801	0.005328	0.0007231	0.001166
0.003	Father_1886-1918	rs11913308	22	28130044	A	167000	-0.0172	0.00439	8.886e-05	0.0001671
0.003	Father_1886-1918	rs130396	22	43092851	C	167000	0.01179	0.003742	0.001627	0.002475
0.003	Father_1886-1918	rs130397	22	43093143	G	167000	0.01467	0.004184	0.0004546	0.0007583
0.003	Father_1886-1918	rs130461	22	34409899	A	142000	-0.01725	0.0054	0.001402	0.002155
0.003	Father_1886-1918	rs132972	22	38562056	A	167000	0.01182	0.003465	0.0006431	0.001046
0.003	Father_1886-1918	rs133651	22	48717026	G	167000	-0.01157	0.003464	0.000839	0.001339
0.003	Father_1886-1918	rs165591	22	20946302	A	167000	-0.01143	0.0037	0.002002	0.002999
0.003	Father_1886-1918	rs2000467	22	24241533	A	167000	0.01142	0.003641	0.001705	0.002584
0.003	Father_1886-1918	rs2018079	22	35378195	G	141000	-0.0157	0.004723	0.0008851	0.001407
0.003	Father_1886-1918	rs2073741	22	19989890	A	167000	0.01388	0.004219	0.0009989	0.001574
0.003	Father_1886-1918	rs2269606	22	44255828	G	167000	0.01548	0.004155	0.0001949	0.000346
0.003	Father_1886-1918	rs2284060	22	38543453	G	167000	-0.01105	0.00349	0.001536	0.002346
0.003	Father_1886-1918	rs5747008	22	17623408	G	167000	-0.01539	0.00488	0.001613	0.002455
0.003	Father_1886-1918	rs5751188	22	42358040	G	167000	0.02006	0.005832	0.0005827	0.0009546
0.003	Father_1886-1918	rs5754819	22	34470167	G	167000	0.02364	0.007406	0.001414	0.002173
0.003	Father_1886-1918	rs5992629	22	17602839	G	167000	-0.0155	0.004886	0.001513	0.002313
0.003	Father_1886-1918	rs6003122	22	43637285	A	167000	0.01122	0.003478	0.001259	0.001951
0.003	Father_1886-1918	rs6008656	22	48739642	G	167000	0.01383	0.003492	7.443e-05	0.0001418
0.003	Father_1886-1918	rs725768	22	18210409	C	167000	-0.03384	0.008851	0.0001314	0.0002401
0.003	Father_1886-1918	rs7285459	22	27608087	G	167000	0.013	0.003686	0.000422	0.0007078
0.003	Father_1886-1918	rs7285856	22	43633461	A	166000	0.01478	0.003524	2.746e-05	5.631e-05
0.003	Father_1886-1918	rs7286313	22	49686438	G	167000	-0.01594	0.004562	0.0004754	0.0007905
0.003	Father_1886-1918	rs7288294	22	27544908	G	167000	-0.01206	0.003894	0.001953	0.002931
0.003	Father_1886-1918	rs738353	22	28130072	A	167000	-0.01402	0.003614	0.0001041	0.0001935
0.003	Father_1886-1918	rs738731	22	48177064	A	167000	-0.0137	0.004278	0.001363	0.0021
0.003	Father_1886-1918	rs738738	22	48180475	G	167000	-0.0127	0.00393	0.001233	0.001913
0.003	Father_1886-1918	rs874822	22	27671082	A	167000	0.01477	0.004643	0.001466	0.002246
0.003	Father_1886-1918	rs916257	22	43631352	G	167000	-0.01507	0.003577	2.508e-05	5.178e-05
0.003	Father_1886-1918	rs9623468	22	42281294	G	167000	0.02817	0.008432	0.0008354	0.001333
0.003	Father_1886-1918	rs11091163	23	45366130	A	167000	0.01331	0.004031	0.000963	0.001521
0.003	Father_1886-1918	rs12010889	23	103428130	G	167000	-0.01469	0.004658	0.001617	0.00246
0.003	Father_1886-1918	rs12057120	23	13411710	G	167000	0.0129	0.003987	0.00121	0.00188
0.003	Father_1886-1918	rs12556965	23	47073623	G	167000	-0.0686	0.02121	0.001219	0.001893
0.003	Father_1886-1918	rs1372756	23	80490621	G	167000	0.01566	0.004926	0.001474	0.002258
0.003	Father_1886-1918	rs17313910	23	4671915	G	135000	-0.01862	0.005158	0.0003073	0.0005274
0.003	Father_1886-1918	rs17326179	23	150457333	A	167000	-0.0186	0.005883	0.001567	0.00239
0.003	Father_1886-1918	rs1933402	23	95633618	G	165000	-0.01517	0.004751	0.001406	0.002161
0.003	Father_1886-1918	rs1954611	23	80378320	C	167000	0.01887	0.005207	0.0002911	0.0005016
0.003	Father_1886-1918	rs1995897	23	134708629	A	167000	-0.0488	0.0143	0.0006458	0.00105
0.003	Father_1886-1918	rs2063348	23	23646565	G	166000	-0.01282	0.003964	0.001221	0.001896
0.003	Father_1886-1918	rs2704913	23	31382869	C	167000	0.0143	0.003936	0.0002801	0.0004841
0.003	Father_1886-1918	rs35296872	23	154454087	G	166000	-0.01496	0.004559	0.001033	0.001624
0.003	Father_1886-1918	rs4375154	23	23637116	A	167000	-0.0124	0.003946	0.001671	0.002537
0.003	Father_1886-1918	rs4559388	23	23605312	G	167000	-0.01245	0.00397	0.001714	0.002597
0.003	Father_1886-1918	rs4824278	23	146136956	A	165000	-0.01508	0.004796	0.001664	0.002526
0.003	Father_1886-1918	rs5906426	23	43877475	A	167000	0.01274	0.004073	0.001764	0.002667
0.003	Father_1886-1918	rs5908199	23	141250624	A	165000	-0.01268	0.004078	0.001869	0.002814
0.003	Father_1886-1918	rs5919774	23	144062361	A	167000	0.0194	0.005373	0.0003055	0.0005246
0.003	Father_1886-1918	rs5924655	23	150815468	C	167000	-0.01412	0.004506	0.001732	0.002622
0.003	Father_1886-1918	rs5927011	23	31376916	G	167000	-0.01686	0.004466	0.0001604	0.0002887
0.003	Father_1886-1918	rs5927723	23	31352009	A	167000	-0.01382	0.0042	0.0009971	0.001571
0.003	Father_1886-1918	rs592807	23	122591656	G	165000	-0.01628	0.00499	0.001107	0.001731
0.003	Father_1886-1918	rs5970755	23	23615791	G	167000	-0.0133	0.003947	0.0007534	0.001211
0.003	Father_1886-1918	rs5979860	23	13421847	A	167000	0.01263	0.003933	0.001319	0.002037
0.003	Father_1886-1918	rs5985861	23	28538665	A	167000	0.02202	0.006854	0.001314	0.00203
0.003	Father_1886-1918	rs6567793	23	154408041	A	166000	-0.01379	0.004383	0.001659	0.002519
0.003	Father_1886-1918	rs6622270	23	79785982	A	166000	0.02133	0.00565	0.00016	0.000288
0.003	Father_1886-1918	rs6622471	23	80676518	A	167000	0.02429	0.007282	0.0008526	0.001359
0.003	Father_1886-1918	rs6631303	23	31385559	G	167000	-0.01567	0.004384	0.0003514	0.0005973
0.003	Father_1886-1918	rs6653666	23	22659630	G	167000	-0.0185	0.005183	0.0003587	0.0006088
0.003	Father_1886-1918	rs7050888	23	100282051	G	167000	-0.0122	0.003943	0.001972	0.002958
0.003	Father_1886-1918	rs7052177	23	23374882	C	167000	0.02317	0.00626	0.0002143	0.0003777
0.003	Father_1886-1918	rs7879310	23	45316294	G	166000	0.01353	0.003942	0.000601	0.0009824
0.003	Father_1886-1918	rs7885045	23	83650393	G	167000	-0.01348	0.00429	0.001671	0.002536
0.003	Father_1886-1918	rs7887503	23	144162086	A	167000	0.01342	0.004118	0.001123	0.001755
0.003	Father_1886-1918	rs7890406	23	6888290	A	167000	-0.04841	0.01527	0.001526	0.002332
0.003	Father_1886-1918	rs1009276	2	202322956	G	166000	-0.02289	0.007351	0.001844	0.002779
0.003	Father_1886-1918	rs10153797	2	619653	A	167000	-0.01452	0.004382	0.0009224	0.001462
0.003	Father_1886-1918	rs10169102	2	183346071	G	167000	0.01144	0.00369	0.001925	0.002893
0.003	Father_1886-1918	rs10174063	2	212864338	G	167000	-0.01267	0.003573	0.0003891	0.0006565
0.003	Father_1886-1918	rs10181515	2	227019461	A	167000	0.0151	0.004147	0.0002718	0.0004708
0.003	Father_1886-1918	rs10191186	2	226917839	C	167000	0.01462	0.004106	0.0003684	0.0006241
0.003	Father_1886-1918	rs10196546	2	70157158	G	167000	-0.01432	0.004059	0.0004189	0.000703
0.003	Father_1886-1918	rs10198451	2	33801017	G	166000	0.01243	0.003571	0.0005023	0.0008318
0.003	Father_1886-1918	rs10201752	2	171566968	G	167000	-0.01415	0.004264	0.0009084	0.001441
0.003	Father_1886-1918	rs10204910	2	224028510	A	167000	0.01764	0.005218	0.0007252	0.001169
0.003	Father_1886-1918	rs10206961	2	85814984	A	167000	-0.01289	0.003503	0.0002347	0.0004109
0.003	Father_1886-1918	rs10209382	2	183304603	A	166000	0.01417	0.003685	0.0001203	0.0002212
0.003	Father_1886-1918	rs1044158	2	85826132	A	167000	-0.01169	0.003603	0.001178	0.001834
0.003	Father_1886-1918	rs10495490	2	2778929	G	167000	0.01237	0.003551	0.0004945	0.0008199
0.003	Father_1886-1918	rs10496107	2	64369336	A	163000	-0.01138	0.003505	0.001166	0.001816
0.003	Father_1886-1918	rs10497958	2	212945959	G	167000	-0.01469	0.004328	0.0006882	0.001114
0.003	Father_1886-1918	rs10928465	2	134637112	G	166000	-0.01118	0.003536	0.001565	0.002386
0.003	Father_1886-1918	rs10933553	2	242286747	G	167000	0.01503	0.004283	0.0004495	0.0007505
0.003	Father_1886-1918	rs11676473	2	46762596	A	167000	-0.0139	0.004381	0.001513	0.002314
0.003	Father_1886-1918	rs11682079	2	76069618	A	167000	-0.01079	0.003469	0.001865	0.002809
0.003	Father_1886-1918	rs11688838	2	142819607	G	166000	-0.01149	0.003472	0.0009344	0.001479
0.003	Father_1886-1918	rs11899693	2	64171419	G	167000	-0.04401	0.01049	2.706e-05	5.553e-05
0.003	Father_1886-1918	rs11904159	2	239025630	G	164000	-0.01514	0.004763	0.00148	0.002266
0.003	Father_1886-1918	rs12327971	2	148327589	A	167000	0.01155	0.003453	0.0008227	0.001314
0.003	Father_1886-1918	rs12466549	2	192615315	A	167000	0.01121	0.003526	0.001483	0.00227
0.003	Father_1886-1918	rs1263599	2	207941850	A	167000	-0.01457	0.00435	0.0008129	0.0013
0.003	Father_1886-1918	rs12691759	2	148329807	A	167000	-0.0112	0.003466	0.001239	0.001921
0.003	Father_1886-1918	rs12693083	2	176728443	C	167000	-0.01174	0.003543	0.0009233	0.001463
0.003	Father_1886-1918	rs12987596	2	212856539	A	167000	-0.01312	0.003561	0.0002302	0.0004036
0.003	Father_1886-1918	rs13001300	2	184401191	G	166000	0.01346	0.004228	0.001451	0.002225
0.003	Father_1886-1918	rs13017982	2	167326652	G	166000	0.01506	0.004831	0.001823	0.002749
0.003	Father_1886-1918	rs13018723	2	196087150	G	167000	-0.01918	0.006183	0.001924	0.00289
0.003	Father_1886-1918	rs1302	2	101628998	A	167000	0.01401	0.004448	0.001639	0.002491
0.003	Father_1886-1918	rs13384306	2	101325207	G	167000	0.02553	0.007233	0.0004171	0.0007001
0.003	Father_1886-1918	rs13398180	2	1516787	A	167000	0.01311	0.003995	0.001036	0.001628
0.003	Father_1886-1918	rs13405357	2	227022036	G	167000	0.01478	0.003638	4.841e-05	9.519e-05
0.003	Father_1886-1918	rs1344293	2	60133158	C	167000	0.01068	0.003457	0.001998	0.002994
0.003	Father_1886-1918	rs1362240	2	230076347	A	167000	-0.01452	0.004203	0.0005498	0.0009046
0.003	Father_1886-1918	rs1400348	2	233863591	A	167000	0.01562	0.004921	0.001502	0.002298
0.003	Father_1886-1918	rs1453170	2	207858148	A	167000	0.01149	0.003499	0.001023	0.001609
0.003	Father_1886-1918	rs1467326	2	121332030	A	167000	-0.01624	0.005001	0.001165	0.001815
0.003	Father_1886-1918	rs1469813	2	2787149	A	165000	-0.01552	0.004499	0.0005592	0.0009189
0.003	Father_1886-1918	rs1515114	2	227098387	G	167000	-0.01124	0.003453	0.001138	0.001776
0.003	Father_1886-1918	rs17023511	2	83671221	A	167000	0.01647	0.00494	0.0008557	0.001363
0.003	Father_1886-1918	rs17039577	2	50189738	G	167000	0.01131	0.003584	0.001604	0.002442
0.003	Father_1886-1918	rs1706864	2	2519911	A	167000	0.01282	0.003471	0.0002227	0.0003913
0.003	Father_1886-1918	rs17262104	2	128747549	C	166000	-0.02481	0.007282	0.0006559	0.001065
0.003	Father_1886-1918	rs17329195	2	60332994	A	167000	-0.01442	0.004448	0.00119	0.001852
0.003	Father_1886-1918	rs17415079	2	212856363	G	167000	-0.01814	0.005184	0.0004679	0.0007789
0.003	Father_1886-1918	rs17439140	2	50195048	A	167000	0.01219	0.003669	0.0008918	0.001417
0.003	Father_1886-1918	rs17481869	2	146124454	A	167000	-0.02269	0.006504	0.0004863	0.0008073
0.003	Father_1886-1918	rs17798260	2	158672783	G	167000	-0.0537	0.01696	0.00154	0.002352
0.003	Father_1886-1918	rs17864755	2	234886363	C	157000	-0.01951	0.006105	0.001398	0.002149
0.003	Father_1886-1918	rs185925	2	31609993	G	167000	-0.01254	0.00368	0.0006532	0.001061
0.003	Father_1886-1918	rs1860165	2	158902989	A	167000	-0.012	0.003731	0.001291	0.001997
0.003	Father_1886-1918	rs2028900	2	85767735	A	167000	-0.01198	0.00347	0.0005541	0.0009112
0.003	Father_1886-1918	rs2068914	2	211741314	A	167000	-0.03328	0.008765	0.0001465	0.0002654
0.003	Father_1886-1918	rs2073443	2	79315285	A	167000	-0.02932	0.0092	0.00144	0.002209
0.003	Father_1886-1918	rs2192580	2	60290360	G	167000	-0.01508	0.00396	0.00014	0.0002546
0.003	Father_1886-1918	rs2572858	2	239260601	A	167000	0.01151	0.003676	0.001746	0.002642
0.003	Father_1886-1918	rs2583556	2	85331686	G	167000	-0.01375	0.003689	0.000194	0.0003444
0.003	Father_1886-1918	rs2601488	2	208995098	G	167000	-0.01197	0.003471	0.0005636	0.0009256
0.003	Father_1886-1918	rs2623439	2	183228308	G	167000	0.01403	0.003759	0.00019	0.0003378
0.003	Father_1886-1918	rs2711305	2	46183424	C	166000	-0.01123	0.003472	0.001216	0.001888
0.003	Father_1886-1918	rs2754530	2	31803403	A	165000	-0.0117	0.003759	0.001862	0.002804
0.003	Father_1886-1918	rs2867105	2	601905	A	167000	0.01594	0.004473	0.0003647	0.0006183
0.003	Father_1886-1918	rs2943657	2	227123439	G	167000	0.016	0.003586	8.183e-06	1.836e-05
0.003	Father_1886-1918	rs3097415	2	211863745	A	153000	-0.03719	0.008368	8.816e-06	1.967e-05
0.003	Father_1886-1918	rs35277801	2	238875491	A	163000	-0.01136	0.003615	0.001676	0.002543
0.003	Father_1886-1918	rs3738846	2	74091805	A	167000	-0.01256	0.003827	0.001027	0.001615
0.003	Father_1886-1918	rs3771343	2	242204286	G	166000	0.01244	0.003574	0.0005024	0.000832
0.003	Father_1886-1918	rs3791904	2	218804984	G	142000	-0.02155	0.006751	0.001415	0.002173
0.003	Father_1886-1918	rs3897712	2	216577373	A	167000	-0.03438	0.01108	0.001911	0.002872
0.003	Father_1886-1918	rs4527244	2	49855331	A	167000	-0.01575	0.004812	0.001067	0.001673
0.003	Father_1886-1918	rs4640417	2	648527	G	162000	-0.01253	0.003624	0.0005483	0.0009023
0.003	Father_1886-1918	rs4664325	2	161281691	G	167000	0.01102	0.003475	0.001517	0.002319
0.003	Father_1886-1918	rs480881	2	13625370	G	162000	0.02006	0.006255	0.001341	0.002067
0.003	Father_1886-1918	rs4853036	2	70059824	A	167000	-0.01298	0.00395	0.001018	0.001601
0.003	Father_1886-1918	rs6433414	2	174317510	G	167000	-0.02644	0.007886	0.000799	0.001279
0.003	Father_1886-1918	rs6437079	2	233839174	G	167000	0.01108	0.003511	0.001605	0.002443
0.003	Father_1886-1918	rs6543534	2	240338904	G	167000	0.01375	0.003624	0.0001475	0.0002671
0.003	Father_1886-1918	rs6546024	2	63921775	A	167000	0.01095	0.003503	0.001771	0.002677
0.003	Father_1886-1918	rs6705421	2	242212672	A	167000	-0.01203	0.003475	0.0005356	0.0008829
0.003	Father_1886-1918	rs6706116	2	148365842	A	167000	0.01225	0.003551	0.0005612	0.000922
0.003	Father_1886-1918	rs6709878	2	7164483	A	167000	-0.01393	0.004188	0.0008789	0.001397
0.003	Father_1886-1918	rs6717058	2	33847659	G	167000	0.01236	0.003895	0.001506	0.002303
0.003	Father_1886-1918	rs6718169	2	223674479	G	167000	-0.01554	0.004561	0.0006568	0.001067
0.003	Father_1886-1918	rs6745662	2	242259614	G	142000	-0.01458	0.004381	0.0008735	0.00139
0.003	Father_1886-1918	rs6752442	2	237073776	G	167000	-0.0127	0.00375	0.0007066	0.001141
0.003	Father_1886-1918	rs6753712	2	237052475	G	167000	-0.01492	0.004621	0.001243	0.001928
0.003	Father_1886-1918	rs7559564	2	242239918	A	167000	0.01482	0.00438	0.0007174	0.001158
0.003	Father_1886-1918	rs7563378	2	212846898	A	165000	-0.01421	0.004527	0.001695	0.00257
0.003	Father_1886-1918	rs7569537	2	183306159	G	167000	0.01247	0.003592	0.0005198	0.0008587
0.003	Father_1886-1918	rs7569763	2	2799469	A	167000	-0.0171	0.005203	0.001017	0.0016
0.003	Father_1886-1918	rs7576557	2	15899188	A	167000	0.01186	0.003472	0.0006346	0.001033
0.003	Father_1886-1918	rs7587997	2	2518821	G	167000	-0.01142	0.00346	0.0009656	0.001525
0.003	Father_1886-1918	rs7591175	2	85738374	A	167000	-0.01173	0.003468	0.0007191	0.00116
0.003	Father_1886-1918	rs785311	2	53030005	G	167000	-0.01473	0.004417	0.0008521	0.001358
0.003	Father_1886-1918	rs934880	2	148300228	G	167000	-0.01116	0.003596	0.00192	0.002885
0.003	Father_1886-1918	rs961496	2	20700786	A	167000	-0.01271	0.003657	0.0005106	0.0008447
0.003	Father_1886-1918	rs10514710	3	44883971	A	167000	0.01587	0.004258	0.0001928	0.0003425
0.003	Father_1886-1918	rs1078968	3	53123486	G	167000	0.01124	0.003484	0.001256	0.001946
0.003	Father_1886-1918	rs1159304	3	30825421	A	167000	-0.07153	0.01827	9.019e-05	0.0001694
0.003	Father_1886-1918	rs11714087	3	142405348	G	167000	-0.01631	0.00523	0.001823	0.00275
0.003	Father_1886-1918	rs11715042	3	8906866	A	167000	0.02757	0.008293	0.0008843	0.001406
0.003	Father_1886-1918	rs11719857	3	99920884	G	167000	0.01389	0.004169	0.0008606	0.001371
0.003	Father_1886-1918	rs11918693	3	148531358	A	167000	-0.02068	0.006197	0.0008456	0.001348
0.003	Father_1886-1918	rs12490796	3	153467805	C	166000	-0.01467	0.003966	0.0002164	0.0003811
0.003	Father_1886-1918	rs12493635	3	113373019	A	167000	-0.01164	0.003625	0.001319	0.002037
0.003	Father_1886-1918	rs12497747	3	14642278	G	167000	-0.01413	0.004103	0.0005734	0.0009405
0.003	Father_1886-1918	rs13059346	3	21361784	G	167000	-0.02761	0.00885	0.001813	0.002736
0.003	Father_1886-1918	rs13068009	3	148747119	G	166000	0.01238	0.003917	0.001572	0.002397
0.003	Father_1886-1918	rs13080037	3	179399570	G	167000	0.01195	0.003514	0.000669	0.001085
0.003	Father_1886-1918	rs13081790	3	174206184	G	167000	0.0114	0.003627	0.001672	0.002538
0.003	Father_1886-1918	rs13092543	3	145996473	A	167000	0.02394	0.007606	0.00165	0.002507
0.003	Father_1886-1918	rs1398646	3	188476787	A	167000	0.02834	0.007994	0.0003918	0.0006607
0.003	Father_1886-1918	rs1400159	3	6826053	A	167000	-0.02122	0.006598	0.001299	0.002007
0.003	Father_1886-1918	rs1402752	3	44687300	G	167000	-0.0165	0.004815	0.0006085	0.0009938
0.003	Father_1886-1918	rs1605193	3	20621602	C	166000	-0.01235	0.00394	0.001721	0.002607
0.003	Father_1886-1918	rs16824330	3	154548410	G	167000	-0.0485	0.01494	0.001172	0.001825
0.003	Father_1886-1918	rs16826828	3	130084939	G	167000	-0.02106	0.006671	0.001593	0.002426
0.003	Father_1886-1918	rs16851955	3	141630680	A	167000	0.0216	0.006596	0.001058	0.00166
0.003	Father_1886-1918	rs17007775	3	70803427	G	167000	-0.0738	0.02256	0.001069	0.001676
0.003	Father_1886-1918	rs17015448	3	24963629	G	167000	0.02623	0.008056	0.001131	0.001766
0.003	Father_1886-1918	rs17034661	3	11602131	A	167000	0.01575	0.00492	0.001366	0.002103
0.003	Father_1886-1918	rs17040514	3	14932502	G	167000	-0.05229	0.01521	0.0005847	0.0009577
0.003	Father_1886-1918	rs17049971	3	9079291	A	164000	0.02579	0.008171	0.0016	0.002436
0.003	Father_1886-1918	rs17063058	3	60410706	G	167000	0.01739	0.005362	0.001182	0.00184
0.003	Father_1886-1918	rs17320277	3	14723724	G	167000	-0.0438	0.00982	8.184e-06	1.836e-05
0.003	Father_1886-1918	rs17577191	3	25208341	G	167000	-0.01606	0.005091	0.001611	0.002451
0.003	Father_1886-1918	rs17817774	3	153779868	G	167000	0.01516	0.004892	0.001939	0.002913
0.003	Father_1886-1918	rs1811351	3	53098775	G	167000	0.01216	0.003651	0.0008639	0.001375
0.003	Father_1886-1918	rs1873389	3	126289362	G	167000	-0.01161	0.003681	0.001615	0.002458
0.003	Father_1886-1918	rs1949343	3	2738457	A	167000	0.01438	0.004551	0.001585	0.002414
0.003	Father_1886-1918	rs2043813	3	72530482	A	167000	-0.01347	0.00405	0.0008805	0.0014
0.003	Father_1886-1918	rs2062775	3	30811589	G	167000	-0.0217	0.006433	0.0007451	0.001199
0.003	Father_1886-1918	rs2120927	3	134996284	G	167000	0.01261	0.004046	0.001822	0.002748
0.003	Father_1886-1918	rs2167115	3	24339734	G	167000	-0.01191	0.00354	0.0007673	0.001232
0.003	Father_1886-1918	rs2242003	3	16811826	A	167000	0.01237	0.00362	0.0006319	0.001029
0.003	Father_1886-1918	rs2249407	3	12494794	C	167000	0.01194	0.003469	0.0005754	0.0009436
0.003	Father_1886-1918	rs2279454	3	44379864	A	165000	-0.01719	0.00483	0.000372	0.0006297
0.003	Father_1886-1918	rs2581830	3	53134098	A	167000	0.0111	0.003521	0.001623	0.002468
0.003	Father_1886-1918	rs2655225	3	13551420	G	164000	-0.0184	0.005286	0.0004984	0.0008259
0.003	Father_1886-1918	rs2728950	3	9399887	A	167000	-0.01258	0.003881	0.00119	0.001852
0.003	Father_1886-1918	rs3172494	3	48731487	A	167000	0.01703	0.005484	0.001898	0.002855
0.003	Father_1886-1918	rs34759087	3	49162284	A	167000	0.01803	0.005271	0.0006265	0.001021
0.003	Father_1886-1918	rs3732430	3	128755953	A	167000	-0.01306	0.003478	0.0001735	0.0003106
0.003	Father_1886-1918	rs3773020	3	29529846	A	167000	0.03701	0.01067	0.000525	0.0008667
0.003	Father_1886-1918	rs3804580	3	44892033	A	167000	0.01109	0.003463	0.001367	0.002105
0.003	Father_1886-1918	rs3804622	3	98303182	G	167000	-0.0108	0.003466	0.001835	0.002767
0.003	Father_1886-1918	rs3853594	3	143961616	A	167000	-0.03407	0.008651	8.212e-05	0.0001553
0.003	Father_1886-1918	rs3911778	3	64230433	A	167000	0.01157	0.003648	0.001513	0.002313
0.003	Father_1886-1918	rs395020	3	128744735	G	167000	-0.01067	0.003452	0.001996	0.002991
0.003	Father_1886-1918	rs4420815	3	33794769	A	167000	-0.01735	0.004876	0.0003731	0.0006314
0.003	Father_1886-1918	rs4681027	3	25584358	C	167000	0.02765	0.008365	0.0009482	0.001499
0.003	Father_1886-1918	rs4859188	3	183142544	G	167000	0.01148	0.00345	0.0008785	0.001397
0.003	Father_1886-1918	rs4955261	3	32258093	C	167000	0.01158	0.003703	0.001765	0.002668
0.003	Father_1886-1918	rs6439154	3	128762833	A	167000	-0.01137	0.003451	0.0009904	0.001561
0.003	Father_1886-1918	rs6444771	3	193839467	C	167000	-0.01089	0.003478	0.001736	0.002628
0.003	Father_1886-1918	rs654033	3	61776260	G	167000	-0.01299	0.004127	0.001644	0.002499
0.003	Father_1886-1918	rs6548485	3	77235898	G	167000	0.01078	0.003465	0.00186	0.002802
0.003	Father_1886-1918	rs6550631	3	18802882	A	167000	0.01104	0.003492	0.001575	0.002401
0.003	Father_1886-1918	rs6763275	3	56307703	A	166000	0.01106	0.003526	0.001706	0.002586
0.003	Father_1886-1918	rs6769686	3	20638228	G	167000	-0.02024	0.005848	0.0005403	0.0008901
0.003	Father_1886-1918	rs6773671	3	187080751	C	167000	-0.01459	0.004493	0.00117	0.001822
0.003	Father_1886-1918	rs6794917	3	72549515	A	167000	-0.01379	0.003485	7.595e-05	0.0001445
0.003	Father_1886-1918	rs6809116	3	44712097	C	142000	0.01347	0.00381	0.0004087	0.0006871
0.003	Father_1886-1918	rs709448	3	107721902	G	167000	-0.02225	0.007045	0.001586	0.002417
0.003	Father_1886-1918	rs710591	3	189824114	G	142000	0.01808	0.005395	0.0008047	0.001288
0.003	Father_1886-1918	rs722711	3	161620429	A	167000	-0.01473	0.004338	0.0006851	0.001109
0.003	Father_1886-1918	rs7616310	3	86573780	G	167000	-0.0119	0.003629	0.001044	0.00164
0.003	Father_1886-1918	rs7621642	3	142503605	A	167000	-0.01353	0.004242	0.001426	0.002189
0.003	Father_1886-1918	rs7622799	3	169098992	A	166000	0.01794	0.005424	0.0009388	0.001486
0.003	Father_1886-1918	rs7630584	3	197130874	A	167000	-0.01451	0.004588	0.001567	0.00239
0.003	Father_1886-1918	rs7645816	3	138670695	A	167000	-0.05792	0.018	0.001293	0.001999
0.003	Father_1886-1918	rs7649147	3	193842582	A	167000	-0.01236	0.003605	0.0006079	0.0009929
0.003	Father_1886-1918	rs7651327	3	167534993	G	166000	-0.01319	0.004166	0.00154	0.002352
0.003	Father_1886-1918	rs795347	3	30745941	A	167000	0.01159	0.003677	0.001617	0.00246
0.003	Father_1886-1918	rs838692	3	189830038	A	167000	0.01193	0.0038	0.001687	0.002559
0.003	Father_1886-1918	rs870808	3	191844140	G	167000	-0.01351	0.003756	0.0003215	0.0005501
0.003	Father_1886-1918	rs883228	3	153712602	G	167000	0.01114	0.003536	0.001627	0.002474
0.003	Father_1886-1918	rs903056	3	14810290	G	167000	-0.01105	0.003468	0.001437	0.002205
0.003	Father_1886-1918	rs970544	3	73759576	A	162000	0.04824	0.01559	0.001976	0.002963
0.003	Father_1886-1918	rs9817827	3	118382257	A	167000	-0.03226	0.01029	0.001714	0.002597
0.003	Father_1886-1918	rs9823492	3	142411287	G	166000	-0.01412	0.004473	0.001597	0.002432
0.003	Father_1886-1918	rs9824917	3	143916142	A	167000	-0.02759	0.00731	0.0001602	0.0002884
0.003	Father_1886-1918	rs9825080	3	44251270	A	167000	0.01275	0.003859	0.0009565	0.001512
0.003	Father_1886-1918	rs9829809	3	86609267	A	161000	-0.0122	0.003776	0.001237	0.001919
0.003	Father_1886-1918	rs9834397	3	116336036	A	167000	-0.01087	0.0035	0.001894	0.002849
0.003	Father_1886-1918	rs9842135	3	32260825	A	167000	0.01428	0.003725	0.0001258	0.0002305
0.003	Father_1886-1918	rs9849164	3	72554528	G	167000	-0.01245	0.00346	0.0003195	0.0005469
0.003	Father_1886-1918	rs9850128	3	187166031	A	167000	-0.01569	0.004768	0.0009974	0.001572
0.003	Father_1886-1918	rs9877084	3	153476041	G	167000	-0.01877	0.005488	0.000625	0.001019
0.003	Father_1886-1918	rs10000037	4	38924330	A	167000	0.01452	0.003994	0.0002764	0.0004782
0.003	Father_1886-1918	rs10008073	4	53692040	A	166000	-0.02032	0.006351	0.001377	0.00212
0.003	Father_1886-1918	rs10018121	4	120846553	C	167000	-0.01471	0.003515	2.845e-05	5.819e-05
0.003	Father_1886-1918	rs10019835	4	156633186	A	166000	-0.01698	0.004295	7.686e-05	0.0001461
0.003	Father_1886-1918	rs10026792	4	2862190	A	167000	0.01235	0.003814	0.001199	0.001864
0.003	Father_1886-1918	rs10033060	4	107175191	A	167000	0.01952	0.00621	0.001672	0.002538
0.003	Father_1886-1918	rs10519425	4	138369786	A	142000	-0.01764	0.005169	0.0006453	0.001049
0.003	Father_1886-1918	rs1057052	4	5822738	A	167000	-0.02588	0.008204	0.001605	0.002444
0.003	Father_1886-1918	rs10805327	4	14358260	A	164000	0.01173	0.003581	0.001055	0.001655
0.003	Father_1886-1918	rs10939086	4	25950606	G	167000	-0.01124	0.003508	0.001357	0.00209
0.003	Father_1886-1918	rs11721813	4	190189043	A	167000	-0.01284	0.003593	0.0003533	0.0006003
0.003	Father_1886-1918	rs11934651	4	181295874	A	167000	-0.01118	0.003475	0.001293	0.002
0.003	Father_1886-1918	rs11936391	4	85779738	G	166000	-0.02962	0.009243	0.001353	0.002085
0.003	Father_1886-1918	rs11936421	4	78270126	G	167000	0.01363	0.004392	0.001909	0.00287
0.003	Father_1886-1918	rs11947613	4	68829223	A	165000	-0.08582	0.02254	0.0001401	0.0002547
0.003	Father_1886-1918	rs12498968	4	189812524	G	161000	-0.01109	0.00353	0.00167	0.002535
0.003	Father_1886-1918	rs12500776	4	78292203	G	167000	0.01565	0.004755	0.001	0.001576
0.003	Father_1886-1918	rs12505740	4	154909285	C	167000	-0.01287	0.003841	0.0008059	0.001289
0.003	Father_1886-1918	rs12646716	4	38379565	G	166000	-0.01104	0.003562	0.001938	0.002911
0.003	Father_1886-1918	rs13101978	4	38333458	A	166000	-0.01133	0.003499	0.001198	0.001862
0.003	Father_1886-1918	rs13127102	4	184504511	A	167000	0.02251	0.006874	0.001059	0.001661
0.003	Father_1886-1918	rs13132107	4	120821994	A	167000	-0.01633	0.003474	2.609e-06	6.372e-06
0.003	Father_1886-1918	rs13143911	4	159433681	G	167000	0.01571	0.004856	0.001216	0.001888
0.003	Father_1886-1918	rs13327958	4	106466128	A	167000	0.03485	0.0106	0.001012	0.001593
0.003	Father_1886-1918	rs1406510	4	172496926	G	166000	0.01815	0.005032	0.000309	0.0005302
0.003	Father_1886-1918	rs1425460	4	35630846	A	167000	-0.01814	0.005655	0.00134	0.002067
0.003	Father_1886-1918	rs1439349	4	178076860	G	167000	-0.0142	0.00347	4.284e-05	8.5e-05
0.003	Father_1886-1918	rs1487624	4	38367538	A	167000	0.01083	0.003461	0.001749	0.002646
0.003	Father_1886-1918	rs1517294	4	156438083	A	167000	0.01105	0.003477	0.001478	0.002263
0.003	Father_1886-1918	rs1545207	4	89239492	A	167000	-0.01239	0.0039	0.001491	0.002282
0.003	Father_1886-1918	rs1560488	4	90225835	A	167000	-0.01346	0.004083	0.0009763	0.001541
0.003	Father_1886-1918	rs1569214	4	172473735	G	166000	0.01477	0.004734	0.001809	0.002731
0.003	Father_1886-1918	rs16990438	4	34858160	A	167000	0.02336	0.007506	0.001859	0.0028
0.003	Father_1886-1918	rs17000469	4	76268697	G	167000	-0.04209	0.01343	0.001731	0.002621
0.003	Father_1886-1918	rs17004846	4	81158221	G	167000	-0.01288	0.003605	0.0003544	0.000602
0.003	Father_1886-1918	rs17009493	4	86042277	G	167000	-0.02926	0.006832	1.84e-05	3.886e-05
0.003	Father_1886-1918	rs17020586	4	94344254	G	167000	0.04535	0.01373	0.0009579	0.001514
0.003	Father_1886-1918	rs17020631	4	94380515	G	166000	0.03448	0.01044	0.0009578	0.001514
0.003	Father_1886-1918	rs17033385	4	156633270	G	167000	-0.01593	0.004423	0.0003158	0.0005411
0.003	Father_1886-1918	rs17090416	4	62098937	G	167000	-0.01362	0.003928	0.0005241	0.0008653
0.003	Father_1886-1918	rs17603641	4	37328396	G	167000	-0.0162	0.005205	0.001861	0.002803
0.003	Father_1886-1918	rs17691258	4	5794481	G	167000	0.01517	0.004523	0.0007992	0.00128
0.003	Father_1886-1918	rs17865839	4	118420302	G	166000	-0.02679	0.008365	0.001362	0.002099
0.003	Father_1886-1918	rs1876117	4	84901327	A	141000	0.01419	0.004246	0.0008306	0.001326
0.003	Father_1886-1918	rs2162098	4	35595493	A	167000	-0.01427	0.004507	0.001541	0.002353
0.003	Father_1886-1918	rs2168523	4	25924857	A	167000	-0.01162	0.003508	0.0009226	0.001462
0.003	Father_1886-1918	rs2172002	4	149352962	G	166000	0.01985	0.005476	0.0002893	0.0004988
0.003	Father_1886-1918	rs2172894	4	90404465	A	167000	-0.01705	0.004746	0.0003277	0.0005598
0.003	Father_1886-1918	rs2725211	4	88970375	A	167000	-0.01869	0.005922	0.001605	0.002443
0.003	Father_1886-1918	rs2728104	4	88973006	G	167000	-0.01904	0.005538	0.0005871	0.0009613
0.003	Father_1886-1918	rs2869291	4	86080861	C	166000	-0.02793	0.006966	6.083e-05	0.0001176
0.003	Father_1886-1918	rs2869329	4	86167996	A	167000	-0.01909	0.00571	0.0008295	0.001325
0.003	Father_1886-1918	rs301119	4	53798146	C	166000	-0.01847	0.0053	0.0004923	0.0008164
0.003	Father_1886-1918	rs301126	4	53795651	G	167000	-0.01846	0.004854	0.0001429	0.0002595
0.003	Father_1886-1918	rs309414	4	123620912	A	167000	0.0119	0.003543	0.0007871	0.001262
0.003	Father_1886-1918	rs355462	4	68379299	A	165000	-0.01761	0.0056	0.001659	0.00252
0.003	Father_1886-1918	rs3796585	4	156639174	A	167000	0.01202	0.003584	0.0007958	0.001275
0.003	Father_1886-1918	rs4128232	4	19980071	G	167000	0.01322	0.003546	0.0001942	0.0003447
0.003	Father_1886-1918	rs4241871	4	190209288	A	165000	-0.01144	0.00348	0.001011	0.001591
0.003	Father_1886-1918	rs4315856	4	137454023	A	166000	-0.01232	0.003606	0.0006332	0.001031
0.003	Father_1886-1918	rs4336187	4	88987916	G	166000	-0.01904	0.004941	0.0001163	0.0002143
0.003	Father_1886-1918	rs4437296	4	181310570	G	167000	0.01195	0.003569	0.0008169	0.001306
0.003	Father_1886-1918	rs4499680	4	175345619	C	164000	0.01372	0.003859	0.0003793	0.0006411
0.003	Father_1886-1918	rs4543091	4	148025559	A	166000	-0.01337	0.004264	0.001714	0.002597
0.003	Father_1886-1918	rs4626202	4	19983104	G	167000	0.01191	0.003485	0.0006341	0.001033
0.003	Father_1886-1918	rs4833624	4	120585497	A	167000	0.01161	0.003719	0.001794	0.00271
0.003	Father_1886-1918	rs4863138	4	190261652	G	167000	-0.01224	0.00354	0.0005445	0.0008965
0.003	Father_1886-1918	rs4863449	4	189987905	G	167000	-0.01172	0.003572	0.001035	0.001626
0.003	Father_1886-1918	rs4863450	4	189988249	A	166000	-0.01501	0.00415	0.0002995	0.0005151
0.003	Father_1886-1918	rs559072	4	149734385	G	166000	-0.02276	0.006873	0.0009257	0.001466
0.003	Father_1886-1918	rs601196	4	159954244	A	142000	0.01515	0.00387	9.082e-05	0.0001705
0.003	Father_1886-1918	rs624833	4	2881256	C	167000	0.01166	0.003755	0.001893	0.002848
0.003	Father_1886-1918	rs6812414	4	38322807	C	167000	-0.01097	0.003511	0.001778	0.002687
0.003	Father_1886-1918	rs6812708	4	15541609	G	167000	0.01223	0.003922	0.001811	0.002733
0.003	Father_1886-1918	rs6813121	4	5751253	A	167000	-0.01511	0.004669	0.001213	0.001884
0.003	Father_1886-1918	rs6816401	4	14362571	A	167000	-0.01438	0.003734	0.000118	0.0002172
0.003	Father_1886-1918	rs6818397	4	3434885	A	167000	-0.01227	0.003542	0.0005305	0.0008751
0.003	Father_1886-1918	rs6819412	4	145605033	A	167000	-0.01161	0.00346	0.0007953	0.001274
0.003	Father_1886-1918	rs6826460	4	149605653	A	166000	0.01223	0.003898	0.001713	0.002595
0.003	Father_1886-1918	rs6827477	4	118395930	A	167000	-0.01994	0.00645	0.001993	0.002987
0.003	Father_1886-1918	rs6832648	4	38398572	A	167000	-0.01179	0.003523	0.000818	0.001307
0.003	Father_1886-1918	rs6837085	4	156417909	G	167000	0.01222	0.003456	0.000406	0.0006829
0.003	Father_1886-1918	rs6838513	4	156672159	A	167000	0.01635	0.004417	0.000215	0.0003789
0.003	Father_1886-1918	rs6838946	4	156675369	A	167000	-0.01836	0.00468	8.721e-05	0.0001642
0.003	Father_1886-1918	rs6847702	4	172540259	A	166000	0.01949	0.005095	0.000131	0.0002393
0.003	Father_1886-1918	rs6854751	4	156641244	A	142000	-0.01357	0.004273	0.001494	0.002286
0.003	Father_1886-1918	rs6855132	4	106877631	G	167000	0.02376	0.00655	0.0002863	0.0004939
0.003	Father_1886-1918	rs7442312	4	156399607	C	167000	-0.01279	0.003464	0.0002238	0.0003932
0.003	Father_1886-1918	rs7656889	4	182677604	A	167000	0.01244	0.003541	0.0004407	0.0007368
0.003	Father_1886-1918	rs7666326	4	149614024	G	167000	-0.01211	0.003457	0.0004587	0.0007647
0.003	Father_1886-1918	rs7671891	4	106366687	A	167000	0.03112	0.00984	0.001563	0.002385
0.003	Father_1886-1918	rs7674926	4	149619238	G	167000	-0.01352	0.004079	0.0009169	0.001453
0.003	Father_1886-1918	rs7677938	4	38321682	A	167000	-0.01409	0.004453	0.001556	0.002374
0.003	Father_1886-1918	rs7678015	4	5793156	A	167000	-0.01074	0.00347	0.001971	0.002956
0.003	Father_1886-1918	rs7695151	4	2772530	A	167000	0.01115	0.003459	0.00127	0.001966
0.003	Father_1886-1918	rs9790702	4	154891356	A	167000	0.01551	0.004725	0.001028	0.001616
0.003	Father_1886-1918	rs987811	4	67872428	G	167000	-0.02047	0.005896	0.0005169	0.0008543
0.003	Father_1886-1918	rs9993034	4	53712071	A	167000	-0.02288	0.00621	0.0002292	0.000402
0.003	Father_1886-1918	rs9994651	4	120587803	A	167000	0.01343	0.003685	0.0002678	0.0004643
0.003	Father_1886-1918	rs9995716	4	120264996	G	167000	0.01121	0.003592	0.001797	0.002714
0.003	Father_1886-1918	rs9998198	4	135838960	G	166000	-0.01599	0.004257	0.0001733	0.0003103
0.003	Father_1886-1918	rs10040556	5	110504412	A	167000	0.01865	0.005217	0.000351	0.0005967
0.003	Father_1886-1918	rs10059733	5	171908794	G	167000	-0.01307	0.004093	0.001411	0.002168
0.003	Father_1886-1918	rs10063241	5	128509412	G	167000	-0.01516	0.004082	0.0002033	0.0003598
0.003	Father_1886-1918	rs10067096	5	156917340	C	167000	0.0156	0.004295	0.0002812	0.0004858
0.003	Father_1886-1918	rs1010119	5	35063117	G	167000	-0.02466	0.007815	0.001604	0.002442
0.003	Father_1886-1918	rs11748868	5	81362480	C	167000	-0.01824	0.005889	0.001958	0.002938
0.003	Father_1886-1918	rs11952674	5	165093364	A	167000	0.02943	0.008143	0.0003021	0.0005192
0.003	Father_1886-1918	rs12514103	5	159488365	A	166000	-0.02975	0.007867	0.0001558	0.000281
0.003	Father_1886-1918	rs12656399	5	56026843	G	167000	-0.0194	0.005779	0.0007864	0.001261
0.003	Father_1886-1918	rs13154298	5	156754659	A	167000	0.01937	0.005309	0.0002641	0.0004585
0.003	Father_1886-1918	rs13181125	5	113680739	C	167000	-0.01608	0.004883	0.0009892	0.00156
0.003	Father_1886-1918	rs1517808	5	124706208	G	166000	0.01116	0.00357	0.001763	0.002665
0.003	Father_1886-1918	rs154021	5	53463117	G	167000	0.01263	0.004068	0.001915	0.002878
0.003	Father_1886-1918	rs156190	5	33313125	A	167000	-0.01818	0.004788	0.0001461	0.0002648
0.003	Father_1886-1918	rs1565059	5	122555432	A	167000	-0.02425	0.007494	0.001211	0.001882
0.003	Father_1886-1918	rs16874878	5	5153911	A	166000	0.01469	0.004546	0.00123	0.001909
0.003	Father_1886-1918	rs16886256	5	56061564	G	167000	-0.02014	0.005634	0.0003515	0.0005974
0.003	Father_1886-1918	rs17144883	5	118368516	A	167000	-0.01923	0.00568	0.0007094	0.001146
0.003	Father_1886-1918	rs17527251	5	54193725	A	142000	-0.01412	0.004195	0.0007626	0.001225
0.003	Father_1886-1918	rs1870057	5	78593204	A	167000	0.01094	0.003495	0.00175	0.002647
0.003	Father_1886-1918	rs1876588	5	56280245	A	167000	-0.0118	0.003465	0.0006624	0.001075
0.003	Father_1886-1918	rs1894964	5	157390960	G	166000	-0.01165	0.003481	0.0008215	0.001313
0.003	Father_1886-1918	rs194381	5	33558544	G	167000	0.01415	0.003508	5.48e-05	0.0001068
0.003	Father_1886-1918	rs1957562	5	157478630	A	167000	-0.01398	0.003897	0.0003338	0.0005696
0.003	Father_1886-1918	rs1990950	5	156920756	A	167000	0.0109	0.003522	0.001961	0.002943
0.003	Father_1886-1918	rs2080462	5	157404028	A	165000	-0.0129	0.003669	0.0004396	0.0007351
0.003	Father_1886-1918	rs2112424	5	87894646	A	167000	0.01328	0.003949	0.0007674	0.001232
0.003	Father_1886-1918	rs2113027	5	82058500	A	166000	0.01718	0.004796	0.0003399	0.0005791
0.003	Father_1886-1918	rs2405802	5	2199605	A	167000	0.01558	0.004534	0.0005895	0.000965
0.003	Father_1886-1918	rs2408483	5	125019413	A	166000	0.01196	0.003697	0.001215	0.001887
0.003	Father_1886-1918	rs2408654	5	56282546	G	167000	-0.01478	0.004205	0.0004408	0.000737
0.003	Father_1886-1918	rs2416371	5	113775870	A	167000	-0.0162	0.004433	0.0002574	0.0004477
0.003	Father_1886-1918	rs2548623	5	53899535	A	167000	-0.01163	0.003477	0.0008225	0.001314
0.003	Father_1886-1918	rs2569011	5	145285452	G	167000	-0.01958	0.005753	0.0006648	0.001079
0.003	Father_1886-1918	rs257921	5	128395295	A	167000	-0.01231	0.003666	0.0007845	0.001258
0.003	Father_1886-1918	rs25901	5	16673975	G	167000	0.01131	0.003645	0.001925	0.002892
0.003	Father_1886-1918	rs2617978	5	167373709	A	167000	0.01232	0.003962	0.00187	0.002815
0.003	Father_1886-1918	rs2962066	5	1552714	A	167000	0.01494	0.004374	0.000636	0.001035
0.003	Father_1886-1918	rs2964381	5	162730903	G	167000	0.01134	0.003465	0.001065	0.00167
0.003	Father_1886-1918	rs2973765	5	177707427	G	167000	-0.0267	0.008618	0.001949	0.002926
0.003	Father_1886-1918	rs300218	5	162736772	G	167000	0.01228	0.00352	0.0004867	0.0008079
0.003	Father_1886-1918	rs30640	5	129018855	A	167000	-0.01769	0.004961	0.0003633	0.000616
0.003	Father_1886-1918	rs32119	5	11313143	A	167000	-0.02456	0.007431	0.0009495	0.001501
0.003	Father_1886-1918	rs337096	5	122569039	G	167000	0.0117	0.003642	0.001321	0.002039
0.003	Father_1886-1918	rs355416	5	77272926	A	167000	0.01195	0.003616	0.000954	0.001508
0.003	Father_1886-1918	rs419517	5	33285417	G	167000	-0.01537	0.004316	0.0003676	0.0006229
0.003	Father_1886-1918	rs42563	5	128400356	A	166000	-0.01339	0.003716	0.0003153	0.0005403
0.003	Father_1886-1918	rs4429888	5	159498587	G	167000	-0.03181	0.008478	0.0001756	0.0003141
0.003	Father_1886-1918	rs4704742	5	156891353	G	167000	0.01282	0.003461	0.0002108	0.0003719
0.003	Father_1886-1918	rs4705665	5	113743653	G	166000	-0.01579	0.004446	0.0003831	0.0006471
0.003	Father_1886-1918	rs6555068	5	2175401	A	167000	0.01823	0.005211	0.0004687	0.0007802
0.003	Father_1886-1918	rs6862302	5	156821313	G	167000	0.0159	0.005081	0.001757	0.002657
0.003	Father_1886-1918	rs6884296	5	109230397	A	167000	-0.01237	0.003689	0.0008011	0.001282
0.003	Father_1886-1918	rs6888913	5	126017826	C	167000	-0.0223	0.0061	0.0002561	0.0004455
0.003	Father_1886-1918	rs6891927	5	32531335	G	167000	0.01258	0.003578	0.0004371	0.0007312
0.003	Father_1886-1918	rs6895193	5	35179593	A	167000	0.01167	0.003692	0.00157	0.002394
0.003	Father_1886-1918	rs7707243	5	158136406	A	167000	-0.06052	0.01938	0.001793	0.002707
0.003	Father_1886-1918	rs7709727	5	130407827	G	167000	0.02058	0.006142	0.0008049	0.001288
0.003	Father_1886-1918	rs7712316	5	33795167	A	167000	-0.01408	0.004547	0.001958	0.002938
0.003	Father_1886-1918	rs7714373	5	78021218	A	167000	-0.01592	0.004609	0.0005524	0.0009086
0.003	Father_1886-1918	rs7724666	5	156817376	A	167000	0.01766	0.005491	0.001301	0.002011
0.003	Father_1886-1918	rs7736920	5	40520217	A	167000	-0.01469	0.004488	0.001068	0.001674
0.003	Father_1886-1918	rs818534	5	32506309	C	164000	0.01133	0.003639	0.001854	0.002793
0.003	Father_1886-1918	rs818545	5	32530797	C	167000	0.0156	0.004965	0.001672	0.002538
0.003	Father_1886-1918	rs831819	5	56358987	A	167000	0.03023	0.008152	0.0002087	0.0003686
0.003	Father_1886-1918	rs832404	5	56267431	G	165000	-0.01664	0.005256	0.00155	0.002365
0.003	Father_1886-1918	rs904714	5	73950760	A	167000	-0.01277	0.004085	0.001772	0.002679
0.003	Father_1886-1918	rs9293769	5	78629346	G	167000	0.01211	0.003528	0.0005944	0.0009724
0.003	Father_1886-1918	rs9313014	5	2866246	A	167000	0.0134	0.004062	0.0009685	0.001529
0.003	Father_1886-1918	rs971075	5	40980585	A	167000	0.01121	0.003607	0.001879	0.002829
0.003	Father_1886-1918	rs10305432	6	39023630	G	167000	-0.01629	0.004191	0.000102	0.0001899
0.003	Father_1886-1918	rs10455568	6	65767393	A	167000	0.01741	0.005617	0.001942	0.002916
0.003	Father_1886-1918	rs10457099	6	156697455	G	167000	0.01436	0.003713	0.0001099	0.0002034
0.003	Father_1886-1918	rs10485427	6	69816451	G	167000	0.01367	0.003944	0.0005293	0.0008733
0.003	Father_1886-1918	rs1146240	6	109661930	A	167000	0.01774	0.005607	0.001554	0.002371
0.003	Father_1886-1918	rs11964764	6	69794079	A	167000	0.01432	0.004521	0.001533	0.002342
0.003	Father_1886-1918	rs1214752	6	43396325	A	167000	0.0114	0.003455	0.0009646	0.001524
0.003	Father_1886-1918	rs1214759	6	43352980	A	167000	-0.01311	0.003679	0.0003653	0.0006192
0.003	Father_1886-1918	rs12199342	6	156691015	G	166000	0.01524	0.004159	0.000247	0.0004307
0.003	Father_1886-1918	rs12215802	6	164810702	C	167000	0.01198	0.003662	0.001074	0.001684
0.003	Father_1886-1918	rs12333136	6	164816435	G	167000	0.01124	0.003607	0.001829	0.002759
0.003	Father_1886-1918	rs1267993	6	124284365	A	167000	-0.01493	0.003696	5.359e-05	0.0001046
0.003	Father_1886-1918	rs13193236	6	90515288	A	167000	0.01337	0.004212	0.001499	0.002293
0.003	Father_1886-1918	rs13195086	6	17320920	A	167000	-0.07538	0.02342	0.001289	0.001993
0.003	Father_1886-1918	rs13203608	6	129993895	A	167000	-0.02158	0.00611	0.0004137	0.0006949
0.003	Father_1886-1918	rs1339377	6	81447367	G	167000	-0.01099	0.00346	0.001497	0.00229
0.003	Father_1886-1918	rs1428373	6	39150098	A	166000	-0.01276	0.00352	0.0002891	0.0004985
0.003	Father_1886-1918	rs1491074	6	113683910	A	167000	-0.01259	0.003773	0.0008485	0.001353
0.003	Father_1886-1918	rs1571997	6	12874309	G	167000	0.01067	0.003447	0.001959	0.00294
0.003	Father_1886-1918	rs1616723	6	38679676	G	166000	-0.02653	0.006439	3.775e-05	7.56e-05
0.003	Father_1886-1918	rs16869492	6	54082465	A	166000	-0.02297	0.007283	0.001609	0.002448
0.003	Father_1886-1918	rs16890768	6	38483167	C	167000	-0.02602	0.007656	0.0006778	0.001098
0.003	Father_1886-1918	rs17074931	6	113560960	C	167000	-0.01582	0.004844	0.001093	0.001711
0.003	Father_1886-1918	rs17547028	6	19677912	G	167000	0.01659	0.005155	0.001295	0.002002
0.003	Father_1886-1918	rs17577049	6	89238395	A	167000	-0.02278	0.007289	0.001781	0.002691
0.003	Father_1886-1918	rs1764043	6	165658888	A	167000	-0.0132	0.003461	0.0001366	0.0002488
0.003	Father_1886-1918	rs1764059	6	165647395	A	167000	-0.01134	0.003458	0.001038	0.001631
0.003	Father_1886-1918	rs1867350	6	160563205	A	167000	-0.03337	0.009419	0.0003953	0.0006662
0.003	Father_1886-1918	rs196698	6	80149183	A	167000	0.01763	0.004964	0.0003819	0.0006452
0.003	Father_1886-1918	rs1984515	6	17554899	A	167000	-0.01325	0.003567	0.0002034	0.0003599
0.003	Father_1886-1918	rs198652	6	143166851	A	167000	0.02623	0.006644	7.904e-05	0.0001499
0.003	Father_1886-1918	rs1998394	6	165664853	A	167000	0.01326	0.003672	0.0003039	0.0005221
0.003	Father_1886-1918	rs201251	6	10012023	G	167000	-0.01123	0.003528	0.001464	0.002243
0.003	Father_1886-1918	rs2022212	6	69531957	G	167000	-0.01689	0.005229	0.00124	0.001923
0.003	Father_1886-1918	rs2051072	6	37561865	C	167000	-0.01466	0.004374	0.0008052	0.001288
0.003	Father_1886-1918	rs2153134	6	123810308	G	166000	0.01374	0.004344	0.001567	0.00239
0.003	Father_1886-1918	rs2185631	6	43408005	A	167000	-0.01144	0.003462	0.0009472	0.001498
0.003	Father_1886-1918	rs2239619	6	52453220	C	167000	-0.01135	0.00356	0.001432	0.002199
0.003	Father_1886-1918	rs2293390	6	36949527	A	167000	0.01136	0.003513	0.001228	0.001906
0.003	Father_1886-1918	rs2297361	6	160496817	G	166000	-0.05819	0.01417	4.037e-05	8.045e-05
0.003	Father_1886-1918	rs2451731	6	26624822	C	167000	-0.0113	0.003554	0.001472	0.002255
0.003	Father_1886-1918	rs2494705	6	26641172	A	142000	0.01232	0.003895	0.001562	0.002383
0.003	Father_1886-1918	rs2498399	6	26706544	G	167000	-0.01171	0.003576	0.001062	0.001666
0.003	Father_1886-1918	rs2635475	6	152476648	A	167000	0.01154	0.003454	0.0008327	0.001329
0.003	Father_1886-1918	rs2813498	6	152491710	G	167000	-0.01435	0.004431	0.001201	0.001868
0.003	Father_1886-1918	rs2813526	6	152511420	A	166000	-0.012	0.003603	0.0008651	0.001377
0.003	Father_1886-1918	rs2815095	6	39156108	A	167000	-0.01618	0.003921	3.696e-05	7.413e-05
0.003	Father_1886-1918	rs2852573	6	102259114	G	167000	0.02384	0.007577	0.001652	0.00251
0.003	Father_1886-1918	rs303055	6	10419476	G	167000	-0.01091	0.003448	0.00156	0.002379
0.003	Father_1886-1918	rs3122169	6	55113411	C	167000	-0.01425	0.004451	0.001363	0.0021
0.003	Father_1886-1918	rs3134704	6	55072273	G	167000	-0.01498	0.004071	0.0002349	0.0004112
0.003	Father_1886-1918	rs3752536	6	130031215	A	167000	-0.01848	0.004927	0.0001762	0.0003149
0.003	Father_1886-1918	rs3778443	6	38654488	A	167000	-0.02489	0.007095	0.000452	0.0007543
0.003	Father_1886-1918	rs3798925	6	161601836	G	167000	-0.02794	0.00748	0.0001879	0.0003343
0.003	Father_1886-1918	rs3798999	6	69714947	A	167000	0.0131	0.003469	0.0001586	0.0002858
0.003	Father_1886-1918	rs3823311	6	151765296	G	161000	0.01513	0.004842	0.001774	0.002682
0.003	Father_1886-1918	rs3851205	6	117463853	A	167000	0.01158	0.003435	0.0007469	0.001202
0.003	Father_1886-1918	rs4398731	6	43279721	A	166000	-0.01206	0.003795	0.001488	0.002278
0.003	Father_1886-1918	rs4634493	6	104151513	A	167000	0.02001	0.005734	0.0004827	0.0008018
0.003	Father_1886-1918	rs4646272	6	160551093	C	167000	-0.03568	0.007158	6.21e-07	1.689e-06
0.003	Father_1886-1918	rs4711250	6	30930270	G	167000	0.07994	0.02287	0.0004743	0.0007887
0.003	Father_1886-1918	rs4714222	6	39158339	A	167000	-0.0125	0.003469	0.0003143	0.0005387
0.003	Father_1886-1918	rs4870081	6	152515301	A	162000	-0.01188	0.003636	0.00109	0.001706
0.003	Father_1886-1918	rs540935	6	168113755	G	167000	0.01164	0.003588	0.001178	0.001834
0.003	Father_1886-1918	rs6458014	6	37688151	A	162000	0.01115	0.003555	0.001717	0.002602
0.003	Father_1886-1918	rs6596867	6	2012739	C	167000	-0.01188	0.003481	0.0006464	0.001051
0.003	Father_1886-1918	rs6911936	6	151779157	C	167000	0.01963	0.005327	0.0002277	0.0003995
0.003	Father_1886-1918	rs6918997	6	21073431	G	166000	0.02292	0.006944	0.0009657	0.001525
0.003	Father_1886-1918	rs6919440	6	43352898	G	167000	-0.01123	0.003484	0.001267	0.001962
0.003	Father_1886-1918	rs6930161	6	122910337	A	141000	0.01267	0.003804	0.0008628	0.001374
0.003	Father_1886-1918	rs6932747	6	90776990	A	167000	0.01572	0.00503	0.001773	0.00268
0.003	Father_1886-1918	rs6933070	6	104026550	G	167000	0.02284	0.006884	0.0009062	0.001438
0.003	Father_1886-1918	rs6935921	6	161108536	G	167000	0.01356	0.003776	0.0003308	0.0005648
0.003	Father_1886-1918	rs6937832	6	138807577	G	167000	-0.02091	0.006104	0.0006137	0.001002
0.003	Father_1886-1918	rs707919	6	31641139	G	167000	-0.01253	0.004027	0.001863	0.002806
0.003	Father_1886-1918	rs707939	6	31726688	A	167000	-0.01259	0.003973	0.001531	0.002339
0.003	Father_1886-1918	rs7454318	6	68915890	A	167000	0.01255	0.003479	0.0003116	0.0005343
0.003	Father_1886-1918	rs751933	6	39164121	A	167000	-0.01106	0.003465	0.001421	0.002182
0.003	Father_1886-1918	rs7753051	6	160528057	G	140000	-0.01506	0.004409	0.0006344	0.001033
0.003	Father_1886-1918	rs7772437	6	161115245	T	164000	-0.01363	0.003492	9.528e-05	0.0001782
0.003	Father_1886-1918	rs7773754	6	39119837	A	167000	-0.01229	0.003708	0.0009215	0.00146
0.003	Father_1886-1918	rs7774945	6	88921181	G	167000	0.02297	0.006798	0.0007285	0.001174
0.003	Father_1886-1918	rs814174	6	7025868	G	167000	-0.01157	0.003683	0.001684	0.002554
0.003	Father_1886-1918	rs8191898	6	160498965	A	167000	-0.02619	0.008325	0.001655	0.002515
0.003	Father_1886-1918	rs858972	6	27154361	A	166000	0.0148	0.004532	0.001091	0.001708
0.003	Father_1886-1918	rs9320467	6	114022121	A	167000	-0.01937	0.00625	0.001938	0.00291
0.003	Father_1886-1918	rs9321485	6	135447773	G	167000	-0.01459	0.004061	0.0003263	0.0005577
0.003	Father_1886-1918	rs9322524	6	155759778	G	167000	0.01534	0.004844	0.001541	0.002353
0.003	Father_1886-1918	rs9322781	6	104365392	G	167000	0.01805	0.005646	0.001389	0.002136
0.003	Father_1886-1918	rs9346129	6	68921177	A	167000	-0.01126	0.003505	0.001321	0.00204
0.003	Father_1886-1918	rs9358960	6	72279021	G	167000	-0.0272	0.008665	0.001693	0.002568
0.003	Father_1886-1918	rs9369434	6	43918407	A	167000	0.01102	0.003508	0.001679	0.002547
0.003	Father_1886-1918	rs9371995	6	156692804	G	167000	0.01445	0.003911	0.0002193	0.0003858
0.003	Father_1886-1918	rs9379089	6	7330169	G	167000	-0.02878	0.008432	0.0006432	0.001046
0.003	Father_1886-1918	rs9385849	6	139412610	A	167000	-0.02369	0.007405	0.001382	0.002126
0.003	Father_1886-1918	rs9398398	6	97771510	G	167000	0.01807	0.00579	0.001806	0.002726
0.003	Father_1886-1918	rs9401084	6	119056733	A	142000	-0.01762	0.005481	0.001308	0.002021
0.003	Father_1886-1918	rs9403946	6	148671794	G	158000	0.01348	0.00404	0.0008509	0.001356
0.003	Father_1886-1918	rs9446418	6	72291534	C	167000	-0.01479	0.004676	0.001561	0.002381
0.003	Father_1886-1918	rs9457827	6	160503656	A	167000	-0.03563	0.007229	8.3e-07	2.208e-06
0.003	Father_1886-1918	rs9457840	6	160541348	G	167000	-0.05411	0.01416	0.0001329	0.0002425
0.003	Father_1886-1918	rs9457925	6	160848743	A	167000	-0.06538	0.01305	5.494e-07	1.508e-06
0.003	Father_1886-1918	rs9470023	6	35398357	A	167000	-0.04117	0.01249	0.0009853	0.001554
0.003	Father_1886-1918	rs9483798	6	135490898	A	167000	-0.01379	0.004326	0.001433	0.002199
0.003	Father_1886-1918	rs9484186	6	138929434	A	167000	-0.01515	0.004249	0.0003639	0.000617
0.003	Father_1886-1918	rs967430	6	2514312	A	165000	-0.01253	0.003653	0.0006008	0.0009822
0.003	Father_1886-1918	rs973052	6	55243149	A	167000	-0.01296	0.003461	0.0001801	0.0003215
0.003	Father_1886-1918	rs1013872	7	147292345	G	167000	0.01395	0.004107	0.0006846	0.001109
0.003	Father_1886-1918	rs10215141	7	68564589	G	167000	-0.01376	0.004263	0.001246	0.001931
0.003	Father_1886-1918	rs10224371	7	154516381	A	167000	-0.01607	0.00483	0.0008803	0.0014
0.003	Father_1886-1918	rs10242782	7	24979715	C	167000	-0.0111	0.003514	0.001581	0.00241
0.003	Father_1886-1918	rs10245285	7	14424939	A	167000	-0.0115	0.003507	0.001038	0.00163
0.003	Father_1886-1918	rs10247439	7	103356296	A	167000	0.01211	0.003712	0.001108	0.001733
0.003	Father_1886-1918	rs10258293	7	105662690	G	167000	-0.0148	0.004624	0.001368	0.002106
0.003	Father_1886-1918	rs10263571	7	15455333	G	167000	-0.01968	0.005485	0.0003339	0.0005697
0.003	Father_1886-1918	rs10480009	7	21698078	A	167000	0.02591	0.00705	0.0002371	0.0004148
0.003	Father_1886-1918	rs10486052	7	14234531	A	167000	0.02035	0.005606	0.0002831	0.0004889
0.003	Father_1886-1918	rs10488244	7	13100035	A	167000	0.04193	0.011	0.0001383	0.0002517
0.003	Father_1886-1918	rs10488606	7	136916976	G	167000	0.01458	0.004541	0.001319	0.002037
0.003	Father_1886-1918	rs10953750	7	113636951	G	167000	-0.01465	0.004456	0.001012	0.001592
0.003	Father_1886-1918	rs10953818	7	115920902	A	167000	0.02138	0.004934	1.475e-05	3.167e-05
0.003	Father_1886-1918	rs10954306	7	130897018	A	167000	-0.01361	0.00399	0.0006474	0.001053
0.003	Father_1886-1918	rs10954732	7	75611149	G	167000	0.0145	0.003679	8.087e-05	0.0001531
0.003	Father_1886-1918	rs1119660	7	113442839	C	167000	-0.01404	0.004452	0.001614	0.002456
0.003	Father_1886-1918	rs115825	7	110562681	A	167000	0.01424	0.003463	3.925e-05	7.838e-05
0.003	Father_1886-1918	rs11771139	7	99736059	A	167000	-0.01201	0.003878	0.001953	0.002932
0.003	Father_1886-1918	rs11771331	7	99605588	G	167000	-0.01377	0.003699	0.000197	0.0003493
0.003	Father_1886-1918	rs11771668	7	24980171	A	167000	-0.01438	0.003539	4.828e-05	9.494e-05
0.003	Father_1886-1918	rs11773521	7	115806524	A	167000	0.01439	0.00378	0.0001403	0.0002551
0.003	Father_1886-1918	rs1179625	7	75255491	G	138000	0.01285	0.003843	0.000828	0.001322
0.003	Father_1886-1918	rs11975565	7	109081747	G	167000	-0.01263	0.003983	0.001517	0.002319
0.003	Father_1886-1918	rs11980852	7	136880693	G	165000	0.01398	0.004481	0.001802	0.002721
0.003	Father_1886-1918	rs1204526	7	126512514	G	166000	0.01157	0.003592	0.001277	0.001976
0.003	Father_1886-1918	rs12111838	7	90078799	A	167000	-0.0111	0.003557	0.001809	0.002731
0.003	Father_1886-1918	rs1230545	7	52793270	A	167000	-0.01363	0.004316	0.001588	0.002419
0.003	Father_1886-1918	rs12531233	7	96854267	G	167000	-0.01335	0.003697	0.0003042	0.0005226
0.003	Father_1886-1918	rs12536122	7	126221861	A	167000	0.01138	0.003534	0.001284	0.001986
0.003	Father_1886-1918	rs12538910	7	57414165	A	167000	-0.01126	0.003549	0.00151	0.002309
0.003	Father_1886-1918	rs12540374	7	107764359	A	166000	-0.01268	0.004052	0.001752	0.00265
0.003	Father_1886-1918	rs12668091	7	36831723	A	167000	0.01379	0.003841	0.0003313	0.0005656
0.003	Father_1886-1918	rs12668723	7	115817269	A	167000	0.01811	0.004753	0.0001391	0.000253
0.003	Father_1886-1918	rs12699609	7	14415780	G	166000	-0.01268	0.003522	0.0003188	0.0005458
0.003	Father_1886-1918	rs12705070	7	99656927	G	167000	-0.01451	0.003852	0.0001651	0.0002966
0.003	Father_1886-1918	rs12705744	7	110519790	A	167000	-0.01198	0.003658	0.001057	0.001658
0.003	Father_1886-1918	rs12718160	7	49284679	A	167000	-0.01199	0.003581	0.0008155	0.001304
0.003	Father_1886-1918	rs13229774	7	82495412	C	167000	0.01196	0.003805	0.001667	0.00253
0.003	Father_1886-1918	rs13242229	7	14379559	G	164000	0.01243	0.003794	0.001049	0.001647
0.003	Father_1886-1918	rs13242366	7	113568382	A	167000	0.01885	0.005265	0.0003421	0.0005827
0.003	Father_1886-1918	rs1419767	7	22344911	A	167000	-0.01248	0.003756	0.0008936	0.001419
0.003	Father_1886-1918	rs1464890	7	129664312	A	167000	-0.01389	0.003479	6.499e-05	0.000125
0.003	Father_1886-1918	rs1522280	7	22368678	G	166000	-0.01244	0.003751	0.00091	0.001443
0.003	Father_1886-1918	rs17143377	7	20863175	A	138000	-0.01942	0.006065	0.001365	0.002103
0.003	Father_1886-1918	rs17148944	7	75601867	A	167000	0.02416	0.005739	2.561e-05	5.279e-05
0.003	Father_1886-1918	rs17156710	7	82438734	G	167000	-0.0302	0.008759	0.0005653	0.0009282
0.003	Father_1886-1918	rs17170583	7	147236636	G	167000	0.01442	0.004193	0.0005842	0.0009569
0.003	Father_1886-1918	rs17280660	7	13606557	A	167000	-0.02304	0.006154	0.000181	0.000323
0.003	Father_1886-1918	rs17389549	7	15603853	A	167000	0.01753	0.004771	0.0002378	0.0004159
0.003	Father_1886-1918	rs17685	7	75616105	A	167000	0.01491	0.003861	0.0001128	0.0002083
0.003	Father_1886-1918	rs17713251	7	39513782	A	167000	0.01262	0.004075	0.001958	0.002938
0.003	Father_1886-1918	rs17744890	7	27533292	A	167000	0.01122	0.003583	0.001739	0.002631
0.003	Father_1886-1918	rs17866121	7	90057918	C	167000	-0.02778	0.008676	0.001363	0.0021
0.003	Father_1886-1918	rs1880337	7	31348947	A	167000	-0.01204	0.003501	0.0005804	0.0009512
0.003	Father_1886-1918	rs1898449	7	51121341	A	167000	-0.01424	0.004197	0.0006907	0.001118
0.003	Father_1886-1918	rs1918912	7	115906373	A	167000	0.01298	0.003896	0.0008603	0.00137
0.003	Father_1886-1918	rs2116532	7	14410451	A	167000	-0.01251	0.003532	0.0003958	0.000667
0.003	Father_1886-1918	rs2158414	7	21491021	A	167000	0.01505	0.003638	3.513e-05	7.072e-05
0.003	Father_1886-1918	rs2159570	7	123850419	A	167000	-0.01074	0.003467	0.001954	0.002932
0.003	Father_1886-1918	rs2214432	7	111795949	A	167000	0.01372	0.00365	0.0001704	0.0003054
0.003	Father_1886-1918	rs2237303	7	21483605	G	167000	0.01314	0.00362	0.0002827	0.0004883
0.003	Father_1886-1918	rs2240090	7	51096974	G	167000	0.01176	0.003665	0.001332	0.002055
0.003	Father_1886-1918	rs2240419	7	18975189	A	167000	0.01283	0.003976	0.001253	0.001942
0.003	Father_1886-1918	rs2242487	7	129657882	A	167000	-0.01371	0.003535	0.0001055	0.0001959
0.003	Father_1886-1918	rs2282888	7	21476132	G	167000	0.01444	0.003578	5.42e-05	0.0001057
0.003	Father_1886-1918	rs2293479	7	99703958	G	165000	-0.01182	0.003806	0.001891	0.002845
0.003	Father_1886-1918	rs2301733	7	110737149	A	167000	-0.01168	0.003509	0.000874	0.00139
0.003	Father_1886-1918	rs2350786	7	136676570	A	167000	-0.01347	0.003921	0.0005953	0.0009738
0.003	Father_1886-1918	rs2396282	7	110485124	G	166000	-0.01082	0.003495	0.00197	0.002955
0.003	Father_1886-1918	rs2522251	7	25052796	A	166000	-0.01084	0.003463	0.001743	0.002638
0.003	Father_1886-1918	rs259006	7	110559571	A	167000	-0.0148	0.003509	2.46e-05	5.085e-05
0.003	Father_1886-1918	rs2710807	7	36094146	A	167000	0.01283	0.004133	0.001904	0.002863
0.003	Father_1886-1918	rs2869738	7	68486634	G	167000	0.01153	0.003463	0.0008651	0.001377
0.003	Father_1886-1918	rs2894771	7	57417569	A	167000	-0.01279	0.003581	0.0003555	0.0006037
0.003	Father_1886-1918	rs3113288	7	68532146	G	167000	-0.01315	0.003514	0.000182	0.0003245
0.003	Father_1886-1918	rs357379	7	138086495	G	167000	0.0126	0.003669	0.0005973	0.0009767
0.003	Father_1886-1918	rs367311	7	105679551	G	167000	0.01182	0.00355	0.000873	0.001389
0.003	Father_1886-1918	rs3747527	7	47118677	A	167000	0.0287	0.009203	0.001819	0.002744
0.003	Father_1886-1918	rs4726571	7	142424782	A	167000	-0.01107	0.003484	0.001494	0.002287
0.003	Father_1886-1918	rs4729561	7	99583286	A	167000	-0.01227	0.003672	0.0008335	0.00133
0.003	Father_1886-1918	rs4730473	7	110661337	C	167000	-0.01652	0.003812	1.479e-05	3.175e-05
0.003	Father_1886-1918	rs4731717	7	130582204	A	167000	0.01747	0.004789	0.0002638	0.0004579
0.003	Father_1886-1918	rs6459952	7	155659348	G	167000	-0.01212	0.003766	0.001285	0.001988
0.003	Father_1886-1918	rs6942726	7	36957908	G	167000	0.0135	0.003858	0.0004679	0.000779
0.003	Father_1886-1918	rs6946058	7	115839253	C	167000	0.01499	0.003881	0.000113	0.0002087
0.003	Father_1886-1918	rs6947526	7	14415253	G	167000	-0.01142	0.003596	0.00149	0.00228
0.003	Father_1886-1918	rs6963742	7	151885204	A	153000	-0.0799	0.01844	1.467e-05	3.15e-05
0.003	Father_1886-1918	rs6968419	7	115823384	G	165000	0.01192	0.003559	0.0008122	0.001299
0.003	Father_1886-1918	rs6970066	7	51130351	A	166000	-0.01475	0.00452	0.001105	0.001728
0.003	Father_1886-1918	rs6978677	7	75636240	A	167000	0.01561	0.003916	6.74e-05	0.0001293
0.003	Father_1886-1918	rs705330	7	98197405	C	166000	-0.01905	0.006109	0.001821	0.002747
0.003	Father_1886-1918	rs711450	7	108982274	A	167000	-0.01387	0.00399	0.000507	0.000839
0.003	Father_1886-1918	rs758250	7	151079871	G	167000	0.01341	0.004009	0.0008229	0.001315
0.003	Father_1886-1918	rs758953	7	110613685	A	167000	-0.01626	0.003668	9.324e-06	2.071e-05
0.003	Father_1886-1918	rs7780647	7	115771982	G	166000	0.01666	0.004813	0.0005398	0.0008893
0.003	Father_1886-1918	rs7788926	7	75619650	G	167000	0.02812	0.005828	1.403e-06	3.589e-06
0.003	Father_1886-1918	rs7795011	7	110602792	C	167000	-0.01376	0.003565	0.0001135	0.0002096
0.003	Father_1886-1918	rs798503	7	2789704	A	167000	-0.01083	0.003498	0.001953	0.002932
0.003	Father_1886-1918	rs892523	7	1583288	A	167000	0.0118	0.003494	0.0007302	0.001177
0.003	Father_1886-1918	rs9639027	7	6746738	G	167000	-0.01204	0.003751	0.001329	0.00205
0.003	Father_1886-1918	rs9641558	7	115769311	G	167000	0.0127	0.003652	0.0005073	0.0008395
0.003	Father_1886-1918	rs9642477	7	52473969	A	167000	0.01204	0.003571	0.0007464	0.001201
0.003	Father_1886-1918	rs9649679	7	75762619	C	166000	0.02103	0.005147	4.388e-05	8.69e-05
0.003	Father_1886-1918	rs9691174	7	75790405	G	158000	0.01457	0.003859	0.0001595	0.0002873
0.003	Father_1886-1918	rs10098490	8	23414369	G	167000	0.01214	0.003542	0.0006077	0.0009926
0.003	Father_1886-1918	rs10101763	8	140497806	G	167000	0.01517	0.004193	0.0002985	0.0005135
0.003	Father_1886-1918	rs10107864	8	34901580	A	167000	-0.02185	0.00666	0.001037	0.001629
0.003	Father_1886-1918	rs10108531	8	39399057	G	167000	0.02129	0.006577	0.001206	0.001874
0.003	Father_1886-1918	rs10108787	8	59887499	A	167000	0.0161	0.004704	0.0006203	0.001012
0.003	Father_1886-1918	rs10109061	8	144239859	G	167000	0.01154	0.003467	0.0008757	0.001393
0.003	Father_1886-1918	rs10113352	8	4143049	A	167000	-0.01235	0.003822	0.001233	0.001913
0.003	Father_1886-1918	rs10113392	8	39671926	G	167000	0.01982	0.005634	0.0004349	0.0007278
0.003	Father_1886-1918	rs1015905	8	62690015	A	167000	0.01188	0.003784	0.001696	0.002572
0.003	Father_1886-1918	rs10481426	8	19279199	A	167000	0.01155	0.003556	0.001165	0.001816
0.003	Father_1886-1918	rs10504389	8	66556187	A	167000	0.0189	0.004811	8.567e-05	0.0001615
0.003	Father_1886-1918	rs10956986	8	143886601	G	167000	-0.01089	0.003514	0.001939	0.002911
0.003	Father_1886-1918	rs11570892	8	19823617	G	167000	0.01557	0.004767	0.001092	0.00171
0.003	Father_1886-1918	rs11775044	8	140587030	A	167000	0.0157	0.004339	0.000298	0.0005127
0.003	Father_1886-1918	rs11778346	8	16726107	G	167000	0.013	0.003881	0.0008076	0.001292
0.003	Father_1886-1918	rs11991347	8	22643323	G	167000	-0.01077	0.003461	0.001853	0.002791
0.003	Father_1886-1918	rs11992032	8	16573891	A	162000	-0.04636	0.01334	0.0005094	0.0008427
0.003	Father_1886-1918	rs12542071	8	10464161	A	167000	0.01686	0.005172	0.001118	0.001746
0.003	Father_1886-1918	rs12549072	8	3980013	C	167000	0.01117	0.003537	0.001594	0.002428
0.003	Father_1886-1918	rs12674523	8	56943139	C	166000	0.01626	0.005163	0.00163	0.002478
0.003	Father_1886-1918	rs12676605	8	59892486	G	167000	0.01283	0.003581	0.0003408	0.0005806
0.003	Father_1886-1918	rs1365277	8	3922303	A	167000	0.01186	0.003655	0.001173	0.001827
0.003	Father_1886-1918	rs1487145	8	32134461	G	167000	0.01124	0.003631	0.001967	0.002951
0.003	Father_1886-1918	rs1542503	8	14348505	G	166000	-0.01537	0.004373	0.000439	0.0007341
0.003	Father_1886-1918	rs16910949	8	140578820	G	167000	0.01936	0.004877	7.217e-05	0.0001378
0.003	Father_1886-1918	rs17088625	8	22647850	G	167000	0.0112	0.003501	0.001376	0.002118
0.003	Father_1886-1918	rs17119369	8	14343159	G	167000	-0.01328	0.004017	0.0009429	0.001492
0.003	Father_1886-1918	rs17700954	8	23447471	G	167000	-0.01868	0.005883	0.001498	0.002291
0.003	Father_1886-1918	rs17787479	8	140510694	A	167000	0.01458	0.004228	0.0005636	0.0009255
0.003	Father_1886-1918	rs2155235	8	103067627	A	167000	0.01703	0.005344	0.001441	0.002211
0.003	Father_1886-1918	rs2167171	8	133487525	C	167000	0.02175	0.006217	0.0004669	0.0007774
0.003	Father_1886-1918	rs2306641	8	21833965	A	167000	0.01131	0.003492	0.001204	0.001872
0.003	Father_1886-1918	rs2410630	8	19875100	A	167000	0.01192	0.003487	0.0006301	0.001026
0.003	Father_1886-1918	rs2442598	8	6394821	A	166000	0.01289	0.003818	0.000739	0.00119
0.003	Father_1886-1918	rs2467184	8	140452253	A	167000	0.01453	0.003757	0.0001098	0.0002033
0.003	Father_1886-1918	rs2555586	8	67400347	A	167000	-0.01638	0.004945	0.0009257	0.001466
0.003	Father_1886-1918	rs2565050	8	27404354	A	167000	-0.01716	0.005173	0.00091	0.001443
0.003	Father_1886-1918	rs2597348	8	133471941	G	167000	0.01212	0.003647	0.0008913	0.001416
0.003	Father_1886-1918	rs2632496	8	48578019	G	167000	0.02386	0.007675	0.001878	0.002827
0.003	Father_1886-1918	rs2673586	8	133472585	A	142000	0.02087	0.005762	0.0002918	0.0005027
0.003	Father_1886-1918	rs2923772	8	102003418	A	167000	0.01267	0.003714	0.0006492	0.001055
0.003	Father_1886-1918	rs2954219	8	3706150	A	167000	-0.0176	0.005107	0.0005677	0.0009319
0.003	Father_1886-1918	rs2976862	8	8307128	A	167000	-0.01842	0.005642	0.001093	0.001711
0.003	Father_1886-1918	rs2976921	8	8266397	C	167000	0.01447	0.004506	0.001318	0.002035
0.003	Father_1886-1918	rs310362	8	59925618	G	167000	0.01104	0.00357	0.001986	0.002978
0.003	Father_1886-1918	rs3105771	8	118718840	G	166000	0.02006	0.006449	0.001865	0.002809
0.003	Father_1886-1918	rs3174040	8	23431407	G	167000	-0.01526	0.004325	0.000418	0.0007017
0.003	Father_1886-1918	rs327	8	19819536	C	167000	0.01209	0.003865	0.001757	0.002657
0.003	Father_1886-1918	rs35601968	8	42916320	C	167000	0.01985	0.005627	0.0004197	0.0007042
0.003	Father_1886-1918	rs3849825	8	4008816	C	166000	0.01134	0.003501	0.001198	0.001862
0.003	Father_1886-1918	rs4237032	8	60229452	G	167000	0.01753	0.005668	0.001984	0.002974
0.003	Father_1886-1918	rs4388446	8	124574279	G	140000	0.01234	0.003972	0.001888	0.002841
0.003	Father_1886-1918	rs4403423	8	19875554	G	167000	0.01237	0.003656	0.000719	0.00116
0.003	Father_1886-1918	rs4512362	8	134801669	A	167000	0.01158	0.003713	0.001815	0.002738
0.003	Father_1886-1918	rs4733319	8	32235881	A	165000	0.01844	0.005112	0.0003087	0.0005298
0.003	Father_1886-1918	rs4734267	8	95084753	A	167000	0.03708	0.01171	0.001547	0.002361
0.003	Father_1886-1918	rs4735557	8	99392416	G	167000	-0.01912	0.00616	0.001911	0.002873
0.003	Father_1886-1918	rs4737503	8	55071319	G	167000	0.01479	0.004511	0.001045	0.001641
0.003	Father_1886-1918	rs4872144	8	23397393	G	167000	-0.01446	0.004021	0.0003238	0.0005536
0.003	Father_1886-1918	rs4875274	8	3950508	A	167000	-0.01113	0.003463	0.001311	0.002026
0.003	Father_1886-1918	rs4909357	8	138228075	C	167000	0.01264	0.003942	0.001339	0.002065
0.003	Father_1886-1918	rs635670	8	103077849	G	167000	-0.01077	0.003458	0.001837	0.00277
0.003	Father_1886-1918	rs6471951	8	62365737	G	167000	0.01705	0.004937	0.0005553	0.000913
0.003	Father_1886-1918	rs6472207	8	66474197	A	167000	0.01385	0.004054	0.0006344	0.001033
0.003	Father_1886-1918	rs6558843	8	3921924	A	167000	-0.01105	0.003455	0.001378	0.002121
0.003	Father_1886-1918	rs6980861	8	19274742	A	165000	0.01201	0.003851	0.001824	0.002751
0.003	Father_1886-1918	rs6982502	8	126479362	G	166000	-0.01106	0.00346	0.001387	0.002134
0.003	Father_1886-1918	rs6988758	8	39727430	G	167000	0.02281	0.005434	2.7e-05	5.543e-05
0.003	Father_1886-1918	rs6990501	8	104290148	G	167000	0.01766	0.005699	0.001947	0.002923
0.003	Father_1886-1918	rs6990663	8	124565203	A	167000	0.0113	0.003502	0.001252	0.001941
0.003	Father_1886-1918	rs6991669	8	66596320	G	164000	0.01371	0.00413	0.0009043	0.001435
0.003	Father_1886-1918	rs7001086	8	50283147	A	142000	-0.01726	0.005498	0.001696	0.002572
0.003	Father_1886-1918	rs7002171	8	66590805	G	165000	0.01647	0.004641	0.0003879	0.0006546
0.003	Father_1886-1918	rs7386782	8	133053309	A	167000	-0.01191	0.003816	0.001804	0.002723
0.003	Father_1886-1918	rs7846188	8	24293499	G	142000	0.01317	0.00416	0.001545	0.002359
0.003	Father_1886-1918	rs871959	8	133050900	A	167000	-0.01233	0.003586	0.0005858	0.0009593
0.003	Father_1886-1918	rs9298226	8	74307417	A	167000	0.01765	0.005561	0.001504	0.002301
0.003	Father_1886-1918	rs9314283	8	24287743	C	167000	0.0139	0.004415	0.001644	0.002499
0.003	Father_1886-1918	rs969124	8	140564192	A	167000	0.01329	0.003671	0.000294	0.0005063
0.003	Father_1886-1918	rs975037	8	122352055	G	165000	0.01282	0.003673	0.0004805	0.0007984
0.003	Father_1886-1918	rs992530	8	23465916	A	167000	0.01232	0.003786	0.001135	0.001771
0.003	Father_1886-1918	rs10120688	9	22056499	A	167000	-0.01859	0.00346	7.775e-08	2.471e-07
0.003	Father_1886-1918	rs1033837	9	14274950	A	167000	0.02627	0.007198	0.0002626	0.0004559
0.003	Father_1886-1918	rs10735624	9	71354184	A	167000	0.02707	0.00839	0.001257	0.001947
0.003	Father_1886-1918	rs10738358	9	14286997	A	165000	0.03381	0.007609	8.846e-06	1.973e-05
0.003	Father_1886-1918	rs10738609	9	22114495	G	167000	-0.02227	0.003459	1.219e-10	6.31e-10
0.003	Father_1886-1918	rs10756730	9	15975069	G	160000	0.01122	0.003564	0.001641	0.002494
0.003	Father_1886-1918	rs10757270	9	22072719	G	167000	-0.02149	0.003494	7.712e-10	3.471e-09
0.003	Father_1886-1918	rs10757958	9	30486331	A	158000	-0.1023	0.02243	5.068e-06	1.178e-05
0.003	Father_1886-1918	rs10761137	9	94728959	A	167000	0.01519	0.003999	0.0001453	0.0002634
0.003	Father_1886-1918	rs10812546	9	27264215	G	167000	-0.01164	0.003759	0.001958	0.002938
0.003	Father_1886-1918	rs10814300	9	35933323	A	166000	-0.01136	0.003595	0.001577	0.002403
0.003	Father_1886-1918	rs10815977	9	8860355	G	167000	0.01274	0.003461	0.0002322	0.0004068
0.003	Father_1886-1918	rs10901294	9	133732752	A	167000	0.02389	0.006515	0.000245	0.0004276
0.003	Father_1886-1918	rs10908904	9	92231894	C	167000	0.0133	0.004259	0.001786	0.002697
0.003	Father_1886-1918	rs10967828	9	27264539	C	167000	-0.01181	0.003589	0.001001	0.001577
0.003	Father_1886-1918	rs10977321	9	8852668	A	167000	0.01137	0.003582	0.001502	0.002298
0.003	Father_1886-1918	rs10985191	9	124014733	A	167000	-0.05774	0.01834	0.001648	0.002504
0.003	Father_1886-1918	rs10992161	9	94687927	G	167000	0.01407	0.004148	0.0006971	0.001127
0.003	Father_1886-1918	rs10992224	9	94841258	A	167000	0.01478	0.004245	0.0004974	0.0008243
0.003	Father_1886-1918	rs11185670	9	137115785	C	167000	0.01624	0.004929	0.0009815	0.001548
0.003	Father_1886-1918	rs11185726	9	137101104	G	167000	0.01634	0.004965	0.0009973	0.001571
0.003	Father_1886-1918	rs11243403	9	134351343	G	167000	0.01089	0.003523	0.001998	0.002994
0.003	Father_1886-1918	rs11790231	9	22053591	A	167000	-0.01742	0.005603	0.00188	0.002829
0.003	Father_1886-1918	rs11791986	9	674275	G	167000	-0.02213	0.006189	0.0003494	0.0005942
0.003	Father_1886-1918	rs11793893	9	95994155	A	164000	0.01898	0.005034	0.0001634	0.0002938
0.003	Father_1886-1918	rs11794832	9	18910581	G	167000	-0.01406	0.004395	0.001381	0.002126
0.003	Father_1886-1918	rs12001524	9	122688434	A	167000	-0.06409	0.0193	0.0008975	0.001425
0.003	Father_1886-1918	rs12236064	9	14849216	A	167000	0.02755	0.008632	0.001413	0.00217
0.003	Father_1886-1918	rs1322991	9	14270342	G	167000	0.0222	0.005881	0.00016	0.0002881
0.003	Father_1886-1918	rs1323504	9	10273124	G	167000	0.01545	0.004597	0.0007794	0.00125
0.003	Father_1886-1918	rs13298881	9	22012051	G	166000	-0.01742	0.005613	0.001912	0.002874
0.003	Father_1886-1918	rs1333042	9	22103813	A	167000	0.02511	0.003461	4.011e-13	3.206e-12
0.003	Father_1886-1918	rs1364614	9	21115002	A	165000	0.01283	0.004086	0.001698	0.002574
0.003	Father_1886-1918	rs1412832	9	22077543	G	165000	0.01519	0.003772	5.636e-05	0.0001096
0.003	Father_1886-1918	rs1537528	9	119771893	A	167000	0.0142	0.004464	0.001466	0.002247
0.003	Father_1886-1918	rs1550051	9	83090265	A	167000	0.01435	0.00461	0.001861	0.002803
0.003	Father_1886-1918	rs16925679	9	10277602	A	167000	0.01404	0.004177	0.0007726	0.00124
0.003	Father_1886-1918	rs16932587	9	15082933	A	167000	-0.04463	0.01346	0.000911	0.001445
0.003	Father_1886-1918	rs17302884	9	119172047	G	167000	-0.01194	0.003519	0.0006883	0.001114
0.003	Father_1886-1918	rs17382569	9	113747491	A	167000	-0.03259	0.007972	4.355e-05	8.63e-05
0.003	Father_1886-1918	rs17437920	9	91864233	A	167000	0.01955	0.00631	0.001952	0.002931
0.003	Father_1886-1918	rs17441968	9	132177003	A	167000	0.02024	0.005835	0.0005238	0.0008648
0.003	Father_1886-1918	rs1806664	9	108626502	G	167000	-0.03037	0.007751	8.941e-05	0.000168
0.003	Father_1886-1918	rs1810914	9	132178213	G	167000	0.0179	0.005514	0.001172	0.001825
0.003	Father_1886-1918	rs1869204	9	21690958	C	167000	0.01299	0.004064	0.001392	0.002141
0.003	Father_1886-1918	rs2653814	9	91423611	A	163000	-0.01453	0.004184	0.0005134	0.0008489
0.003	Father_1886-1918	rs2740486	9	107666513	C	167000	0.01132	0.003461	0.00107	0.001678
0.003	Father_1886-1918	rs2767777	9	126959073	G	167000	-0.01305	0.004224	0.001998	0.002993
0.003	Father_1886-1918	rs2780982	9	86232809	A	166000	0.01351	0.004012	0.0007602	0.001222
0.003	Father_1886-1918	rs291765	9	93667010	G	167000	0.01377	0.0043	0.001367	0.002105
0.003	Father_1886-1918	rs3217992	9	22003223	A	167000	-0.02082	0.003581	6.117e-09	2.354e-08
0.003	Father_1886-1918	rs324493	9	9024060	A	165000	-0.05951	0.01745	0.0006515	0.001059
0.003	Father_1886-1918	rs354815	9	89036027	A	167000	-0.01082	0.003455	0.001741	0.002635
0.003	Father_1886-1918	rs3731239	9	21974218	G	167000	0.01173	0.003588	0.001078	0.00169
0.003	Father_1886-1918	rs3731257	9	21966221	A	167000	-0.01404	0.003967	0.0003999	0.0006734
0.003	Father_1886-1918	rs3763630	9	35731004	A	167000	0.01423	0.004432	0.001323	0.002042
0.003	Father_1886-1918	rs3789304	9	119150675	A	167000	-0.01187	0.003486	0.0006588	0.00107
0.003	Father_1886-1918	rs3817141	9	108468129	A	166000	-0.0194	0.006016	0.001264	0.001958
0.003	Father_1886-1918	rs3905385	9	94668733	G	167000	0.01389	0.004033	0.0005759	0.0009442
0.003	Father_1886-1918	rs4076428	9	134353724	A	167000	0.01126	0.003621	0.001882	0.002832
0.003	Father_1886-1918	rs4388534	9	38252526	G	167000	0.01187	0.003481	0.000646	0.00105
0.003	Father_1886-1918	rs4442246	9	16391294	G	167000	0.01127	0.003481	0.001208	0.001878
0.003	Father_1886-1918	rs4740372	9	133675739	G	167000	0.01775	0.005352	0.0009134	0.001448
0.003	Father_1886-1918	rs4741545	9	15830506	C	167000	0.01163	0.003458	0.0007733	0.001241
0.003	Father_1886-1918	rs4742861	9	105597227	A	167000	-0.02909	0.009012	0.001249	0.001936
0.003	Father_1886-1918	rs4743853	9	92867363	G	167000	-0.01323	0.003801	0.000498	0.0008252
0.003	Father_1886-1918	rs4744110	9	94642450	G	162000	0.01562	0.004142	0.0001627	0.0002927
0.003	Father_1886-1918	rs4877751	9	85885299	G	167000	-0.01103	0.003542	0.00184	0.002774
0.003	Father_1886-1918	rs4961428	9	16951644	A	167000	-0.01453	0.004642	0.001744	0.00264
0.003	Father_1886-1918	rs545226	9	22012422	G	163000	-0.01673	0.003564	2.693e-06	6.563e-06
0.003	Father_1886-1918	rs6474827	9	14286126	A	167000	0.02779	0.006074	4.757e-06	1.111e-05
0.003	Father_1886-1918	rs6477355	9	8809042	A	167000	0.01381	0.003966	0.0004976	0.0008247
0.003	Father_1886-1918	rs6477473	9	108603039	C	167000	-0.02061	0.005859	0.0004348	0.0007276
0.003	Father_1886-1918	rs7031721	9	95955986	G	167000	0.01545	0.004847	0.001437	0.002204
0.003	Father_1886-1918	rs7035564	9	104211810	A	167000	-0.02464	0.007898	0.001808	0.002729
0.003	Father_1886-1918	rs7041637	9	21961866	A	166000	-0.01404	0.003864	0.0002811	0.0004856
0.003	Father_1886-1918	rs7044238	9	16211137	G	166000	-0.01154	0.003626	0.001459	0.002236
0.003	Father_1886-1918	rs7049105	9	22028801	G	166000	-0.01817	0.003475	1.725e-07	5.163e-07
0.003	Father_1886-1918	rs7847362	9	84389731	C	165000	-0.01989	0.005324	0.0001869	0.0003327
0.003	Father_1886-1918	rs7852962	9	113196733	C	167000	-0.01647	0.004797	0.0005983	0.0009784
0.003	Father_1886-1918	rs7855550	9	137470639	A	167000	0.02139	0.006862	0.001826	0.002753
0.003	Father_1886-1918	rs7855709	9	8812871	G	167000	0.01388	0.003981	0.0004869	0.0008082
0.003	Father_1886-1918	rs7863519	9	113208250	C	167000	-0.01732	0.0044	8.269e-05	0.0001563
0.003	Father_1886-1918	rs7867822	9	20676454	A	167000	0.01207	0.003694	0.00108	0.001692
0.003	Father_1886-1918	rs7867942	9	126771321	G	167000	-0.02573	0.007359	0.0004715	0.0007845
0.003	Father_1886-1918	rs9409478	9	96379505	A	166000	0.01897	0.006113	0.001914	0.002877
0.003	Father_1886-1918	rs945440	9	18907551	G	167000	-0.01535	0.00489	0.001692	0.002566
0.003	Father_1886-1918	rs9632885	9	22072638	A	167000	-0.02417	0.00347	3.302e-12	2.248e-11
0.003	Father_1886-1940	rs1012553	10	50740143	A	309000	-0.01018	0.002896	0.0004387	0.001225
0.003	Father_1886-1940	rs10509336	10	73344838	A	309000	0.01607	0.004822	0.0008582	0.002174
0.003	Father_1886-1940	rs10793513	10	44494546	G	309000	0.008902	0.002683	0.0009083	0.002282
0.003	Father_1886-1940	rs10827503	10	35724454	G	309000	-0.008554	0.002545	0.0007758	0.001994
0.003	Father_1886-1940	rs10857710	10	135222911	G	308000	0.03656	0.009487	0.0001162	0.0003937
0.003	Father_1886-1940	rs10886895	10	123047313	A	309000	-0.009785	0.003008	0.001143	0.002779
0.003	Father_1886-1940	rs10887623	10	88315181	G	308000	-0.01977	0.004254	3.36e-06	1.92e-05
0.003	Father_1886-1940	rs10901724	10	128535769	A	309000	0.009033	0.002678	0.0007452	0.001926
0.003	Father_1886-1940	rs10999834	10	73230904	C	309000	0.009555	0.002574	0.0002058	0.0006415
0.003	Father_1886-1940	rs11156470	10	133590090	C	309000	0.0108	0.002985	0.0002984	0.000881
0.003	Father_1886-1940	rs11191727	10	105322373	A	309000	0.01273	0.003641	0.0004736	0.001307
0.003	Father_1886-1940	rs11196379	10	115324358	G	309000	-0.01023	0.003035	0.0007455	0.001927
0.003	Father_1886-1940	rs11238782	10	44438863	G	307000	0.00897	0.002611	0.0005915	0.001581
0.003	Father_1886-1940	rs11252364	10	4168660	A	309000	0.01536	0.004675	0.001017	0.002514
0.003	Father_1886-1940	rs12257984	10	129313964	G	309000	-0.009297	0.00261	0.0003682	0.001054
0.003	Father_1886-1940	rs12269200	10	18536511	G	309000	-0.01748	0.005277	0.0009245	0.002317
0.003	Father_1886-1940	rs12765699	10	9035786	G	309000	-0.01535	0.00449	0.000629	0.001666
0.003	Father_1886-1940	rs1538245	10	8444689	C	309000	-0.0129	0.003982	0.001194	0.002884
0.003	Father_1886-1940	rs1545045	10	127190028	C	309000	0.009843	0.002977	0.0009431	0.002356
0.003	Father_1886-1940	rs1757214	10	18534850	A	309000	-0.01112	0.003254	0.0006333	0.001676
0.003	Father_1886-1940	rs1896514	10	88175881	G	309000	-0.008531	0.002542	0.0007917	0.002029
0.003	Father_1886-1940	rs1926145	10	129571206	A	309000	-0.0247	0.007343	0.0007688	0.001978
0.003	Father_1886-1940	rs1932543	10	120215198	G	309000	-0.008371	0.002593	0.001244	0.002986
0.003	Father_1886-1940	rs1935471	10	56120566	A	309000	-0.02216	0.006553	0.0007219	0.001875
0.003	Father_1886-1940	rs1984070	10	2212037	A	309000	0.008602	0.002612	0.0009908	0.002458
0.003	Father_1886-1940	rs2114563	10	60205817	G	307000	0.01071	0.003176	0.000745	0.001926
0.003	Father_1886-1940	rs2240880	10	115312606	A	308000	0.01341	0.003422	8.894e-05	0.0003134
0.003	Father_1886-1940	rs2296596	10	13735947	G	309000	-0.01393	0.004111	0.0007028	0.001832
0.003	Father_1886-1940	rs2383992	10	33879069	A	309000	0.008876	0.002641	0.0007781	0.001999
0.003	Father_1886-1940	rs2477036	10	10532725	A	309000	-0.008744	0.0026	0.0007702	0.001981
0.003	Father_1886-1940	rs2478839	10	30306804	A	309000	-0.008938	0.002562	0.0004868	0.001339
0.003	Father_1886-1940	rs2505132	10	30300996	A	309000	-0.008461	0.002563	0.0009637	0.0024
0.003	Father_1886-1940	rs268329	10	44549886	A	309000	0.03358	0.009947	0.0007365	0.001907
0.003	Father_1886-1940	rs2765648	10	4076159	G	309000	0.01142	0.003505	0.001121	0.002731
0.003	Father_1886-1940	rs2915772	10	118322269	A	309000	0.01681	0.004586	0.000247	0.0007495
0.003	Father_1886-1940	rs3802701	10	126310781	A	309000	0.008943	0.00271	0.0009657	0.002405
0.003	Father_1886-1940	rs3850691	10	115329346	G	309000	0.0111	0.003174	0.0004718	0.001303
0.003	Father_1886-1940	rs3858289	10	127163681	A	309000	0.009337	0.00281	0.0008912	0.002245
0.003	Father_1886-1940	rs3929230	10	127140233	G	309000	0.008832	0.002625	0.000768	0.001977
0.003	Father_1886-1940	rs4132670	10	114767771	A	308000	-0.009541	0.002748	0.000518	0.001411
0.003	Father_1886-1940	rs4293044	10	128532675	G	309000	0.00901	0.002723	0.0009379	0.002345
0.003	Father_1886-1940	rs4314962	10	13737029	C	308000	-0.01294	0.003574	0.0002952	0.0008728
0.003	Father_1886-1940	rs4333906	10	66925446	A	307000	0.01254	0.003727	0.0007651	0.00197
0.003	Father_1886-1940	rs4405249	10	124183732	A	308000	0.0129	0.003442	0.0001796	0.000571
0.003	Father_1886-1940	rs4414157	10	75808313	G	309000	-0.01325	0.003675	0.0003128	0.0009171
0.003	Father_1886-1940	rs4418698	10	18763854	A	308000	0.00931	0.002563	0.0002814	0.0008378
0.003	Father_1886-1940	rs4752158	10	120175019	A	309000	-0.01269	0.003175	6.4e-05	0.0002367
0.003	Father_1886-1940	rs4881282	10	4135785	A	309000	0.009956	0.002933	0.0006879	0.001799
0.003	Father_1886-1940	rs4948582	10	44435246	G	309000	0.009235	0.002764	0.0008337	0.00212
0.003	Father_1886-1940	rs4948591	10	44490414	C	309000	0.008472	0.002552	0.0009006	0.002265
0.003	Father_1886-1940	rs6601810	10	4140086	A	296000	0.01531	0.004681	0.001073	0.002631
0.003	Father_1886-1940	rs7073480	10	13214160	A	308000	-0.014	0.004007	0.000477	0.001315
0.003	Father_1886-1940	rs7087052	10	67767772	A	309000	0.01264	0.003752	0.0007537	0.001945
0.003	Father_1886-1940	rs7090003	10	55503294	A	309000	-0.01218	0.003112	9.052e-05	0.0003181
0.003	Father_1886-1940	rs7899137	10	76668462	A	308000	-0.008421	0.002585	0.001124	0.002737
0.003	Father_1886-1940	rs7903175	10	123105123	A	309000	0.009602	0.002826	0.0006791	0.001779
0.003	Father_1886-1940	rs7904064	10	110868225	A	309000	-0.05071	0.01548	0.001057	0.002598
0.003	Father_1886-1940	rs7916256	10	55486017	A	309000	-0.01074	0.003182	0.0007404	0.001916
0.003	Father_1886-1940	rs7916849	10	60201928	A	308000	0.01081	0.003051	0.0003941	0.001117
0.003	Father_1886-1940	rs7919051	10	108754043	A	309000	-0.07687	0.01676	4.538e-06	2.48e-05
0.003	Father_1886-1940	rs898325	10	127855523	A	309000	-0.01103	0.003366	0.001048	0.002579
0.003	Father_1886-1940	rs9419288	10	134810519	G	309000	-0.01064	0.002742	0.000105	0.000361
0.003	Father_1886-1940	rs9420769	10	83566947	G	309000	0.02514	0.006543	0.0001218	0.0004097
0.003	Father_1886-1940	rs9421758	10	48533604	A	309000	0.01021	0.002803	0.0002685	0.0008049
0.003	Father_1886-1940	rs9630106	10	123044383	G	309000	-0.00888	0.002594	0.0006191	0.001644
0.003	Father_1886-1940	rs10500995	11	25101510	G	309000	-0.06544	0.01784	0.0002449	0.0007442
0.003	Father_1886-1940	rs10500996	11	25101688	A	309000	-0.06597	0.01549	2.061e-05	9.005e-05
0.003	Father_1886-1940	rs10501131	11	34028130	A	309000	0.01423	0.004283	0.0008927	0.002248
0.003	Father_1886-1940	rs10734176	11	87824321	A	309000	0.01112	0.003068	0.0002877	0.0008538
0.003	Father_1886-1940	rs10734289	11	20098670	C	309000	0.008847	0.002729	0.001188	0.002871
0.003	Father_1886-1940	rs10750490	11	131657002	C	257000	0.01374	0.004234	0.001172	0.002837
0.003	Father_1886-1940	rs10750861	11	57181407	G	309000	0.008987	0.002607	0.0005654	0.001521
0.003	Father_1886-1940	rs10830204	11	88787544	A	309000	0.00985	0.002538	0.0001041	0.0003583
0.003	Father_1886-1940	rs10831027	11	93068949	G	298000	0.009952	0.00266	0.0001834	0.0005812
0.003	Father_1886-1940	rs10835507	11	29312419	A	308000	-0.01002	0.002769	0.0002939	0.0008697
0.003	Father_1886-1940	rs10838790	11	47931557	G	309000	-0.01215	0.003632	0.0008256	0.002103
0.003	Father_1886-1940	rs10892923	11	122771528	A	309000	-0.01038	0.002628	7.775e-05	0.0002794
0.003	Father_1886-1940	rs10894267	11	130714861	G	306000	-0.008676	0.002566	0.0007234	0.001878
0.003	Father_1886-1940	rs10894332	11	131021493	G	307000	-0.02092	0.006393	0.001068	0.002622
0.003	Father_1886-1940	rs10894599	11	100066196	G	309000	0.009298	0.002648	0.000447	0.001244
0.003	Father_1886-1940	rs10895548	11	103820517	G	309000	-0.009668	0.002567	0.0001661	0.0005342
0.003	Father_1886-1940	rs11024327	11	17601219	A	309000	0.01094	0.003347	0.001081	0.002649
0.003	Father_1886-1940	rs11024348	11	17651495	A	308000	0.01111	0.003035	0.0002505	0.0007586
0.003	Father_1886-1940	rs11028130	11	24759664	C	309000	0.01121	0.003107	0.000309	0.0009077
0.003	Father_1886-1940	rs11039358	11	47746962	G	260000	-0.02304	0.00594	0.0001052	0.0003615
0.003	Father_1886-1940	rs11217682	11	119961707	G	309000	0.0101	0.002714	0.000198	0.0006205
0.003	Father_1886-1940	rs11220386	11	126031494	G	309000	-0.00909	0.002798	0.001159	0.002811
0.003	Father_1886-1940	rs11228677	11	56370425	A	308000	-0.01071	0.002777	0.0001155	0.0003917
0.003	Father_1886-1940	rs11228700	11	56419115	A	309000	-0.01046	0.00261	6.092e-05	0.0002269
0.003	Father_1886-1940	rs11230851	11	61751148	A	309000	0.01513	0.004526	0.0008273	0.002106
0.003	Father_1886-1940	rs1148058	11	128712781	A	309000	-0.01132	0.003383	0.0008186	0.002087
0.003	Father_1886-1940	rs11570094	11	47359706	A	308000	0.01145	0.00277	3.588e-05	0.0001444
0.003	Father_1886-1940	rs1159528	11	43095376	A	309000	0.01318	0.004011	0.001019	0.002517
0.003	Father_1886-1940	rs11600255	11	103692429	C	309000	-0.008647	0.002543	0.0006714	0.001762
0.003	Father_1886-1940	rs11606426	11	43596350	G	309000	0.01404	0.004126	0.0006651	0.001748
0.003	Father_1886-1940	rs12224013	11	43514710	C	308000	0.03172	0.007952	6.627e-05	0.0002438
0.003	Father_1886-1940	rs12275191	11	24087672	G	309000	-0.008936	0.002684	0.0008718	0.002203
0.003	Father_1886-1940	rs12361463	11	56481768	G	309000	-0.01216	0.003026	5.877e-05	0.00022
0.003	Father_1886-1940	rs12417717	11	29312842	G	309000	-0.008458	0.002563	0.0009649	0.002403
0.003	Father_1886-1940	rs12573952	11	114124554	A	309000	-0.0177	0.004803	0.0002284	0.0007011
0.003	Father_1886-1940	rs12577247	11	129271996	A	309000	-0.01229	0.003584	0.0006043	0.00161
0.003	Father_1886-1940	rs12790863	11	72979231	G	308000	0.01137	0.003362	0.0007159	0.001861
0.003	Father_1886-1940	rs12799484	11	133399500	A	309000	-0.01041	0.003136	0.0009031	0.002271
0.003	Father_1886-1940	rs1353111	11	129275743	G	308000	-0.01336	0.004017	0.0008798	0.00222
0.003	Father_1886-1940	rs1354789	11	132752347	A	309000	0.009335	0.002599	0.0003287	0.0009567
0.003	Father_1886-1940	rs1400549	11	103739909	A	309000	0.008793	0.002556	0.0005804	0.001556
0.003	Father_1886-1940	rs1453584	11	99807394	G	309000	0.008882	0.002551	0.0004982	0.001365
0.003	Father_1886-1940	rs1471936	11	103819333	G	309000	-0.009872	0.002552	0.0001095	0.0003743
0.003	Father_1886-1940	rs1487911	11	103775113	A	309000	-0.008787	0.002651	0.0009178	0.002302
0.003	Father_1886-1940	rs1522085	11	33775424	G	309000	-0.009095	0.002722	0.0008343	0.002122
0.003	Father_1886-1940	rs1605271	11	32149398	G	309000	0.008332	0.002548	0.001078	0.002641
0.003	Father_1886-1940	rs17105927	11	106541195	G	308000	-0.0174	0.004918	0.0004036	0.00114
0.003	Father_1886-1940	rs1733439	11	130412175	G	309000	0.01394	0.004235	0.0009984	0.002474
0.003	Father_1886-1940	rs17726787	11	47529037	A	309000	-0.01364	0.003671	0.000202	0.0006313
0.003	Father_1886-1940	rs1789742	11	121833245	C	309000	-0.02499	0.007084	0.0004184	0.001176
0.003	Father_1886-1940	rs1870675	11	115432255	A	309000	0.00955	0.002625	0.0002744	0.0008199
0.003	Father_1886-1940	rs1939894	11	107494204	G	309000	0.008629	0.002548	0.0007078	0.001843
0.003	Father_1886-1940	rs1944142	11	130717440	G	309000	0.008612	0.002541	0.0007002	0.001826
0.003	Father_1886-1940	rs2140151	11	122736853	A	309000	-0.009592	0.002832	0.0007067	0.001841
0.003	Father_1886-1940	rs2155338	11	105840364	A	308000	0.008682	0.002604	0.0008544	0.002165
0.003	Father_1886-1940	rs2198123	11	103503946	A	309000	-0.008244	0.002546	0.001203	0.002902
0.003	Father_1886-1940	rs2399638	11	93018077	G	308000	-0.008758	0.002578	0.0006797	0.001781
0.003	Father_1886-1940	rs262314	11	43045671	A	309000	0.01516	0.004381	0.0005374	0.001456
0.003	Father_1886-1940	rs2679053	11	43605304	A	309000	-0.008398	0.002596	0.001214	0.002925
0.003	Father_1886-1940	rs2725442	11	132786554	G	309000	0.01797	0.005127	0.0004556	0.001265
0.003	Father_1886-1940	rs3740689	11	47380593	G	309000	-0.01058	0.002585	4.244e-05	0.0001667
0.003	Father_1886-1940	rs3741016	11	122775578	G	309000	-0.008548	0.00256	0.0008396	0.002133
0.003	Father_1886-1940	rs4121744	11	88874969	A	309000	-0.009896	0.002545	0.0001011	0.0003497
0.003	Father_1886-1940	rs4145958	11	103817645	G	309000	-0.009015	0.002627	0.0005988	0.001598
0.003	Father_1886-1940	rs4322357	11	93072843	A	309000	-0.008936	0.002575	0.0005197	0.001415
0.003	Father_1886-1940	rs4754985	11	103646897	A	309000	0.008382	0.002544	0.0009843	0.002444
0.003	Father_1886-1940	rs4755202	11	43619938	A	309000	0.00858	0.002564	0.0008195	0.002089
0.003	Father_1886-1940	rs4923445	11	27471596	G	309000	0.01158	0.003392	0.0006426	0.001697
0.003	Father_1886-1940	rs541150	11	103792540	C	306000	-0.008391	0.00257	0.001094	0.002676
0.003	Father_1886-1940	rs559362	11	55275456	C	309000	0.012	0.003377	0.0003778	0.001078
0.003	Father_1886-1940	rs574028	11	88933250	A	307000	-0.008358	0.00256	0.001094	0.002676
0.003	Father_1886-1940	rs625993	11	126505327	A	309000	0.01026	0.002842	0.0003047	0.0008969
0.003	Father_1886-1940	rs658845	11	56294275	A	309000	-0.0124	0.003072	5.467e-05	0.0002069
0.003	Father_1886-1940	rs7109581	11	93180531	C	309000	-0.0088	0.002584	0.0006593	0.001735
0.003	Father_1886-1940	rs7110293	11	34778351	A	309000	-0.01365	0.00375	0.0002725	0.0008151
0.003	Father_1886-1940	rs7114583	11	122749214	A	309000	-0.01448	0.004232	0.0006208	0.001648
0.003	Father_1886-1940	rs7114955	11	29086045	A	309000	-0.01419	0.00428	0.000915	0.002296
0.003	Father_1886-1940	rs7128086	11	17538539	G	309000	-0.01335	0.003966	0.0007622	0.001964
0.003	Father_1886-1940	rs7342213	11	97758518	G	308000	-0.01289	0.003921	0.001009	0.002498
0.003	Father_1886-1940	rs7924620	11	17607572	A	309000	0.01053	0.003215	0.001062	0.002608
0.003	Father_1886-1940	rs7925649	11	72970776	A	309000	0.01084	0.003226	0.0007787	0.002
0.003	Father_1886-1940	rs7930612	11	47699398	A	309000	-0.01238	0.003556	0.0005001	0.00137
0.003	Father_1886-1940	rs7943936	11	130709067	G	309000	-0.0087	0.00254	0.0006155	0.001636
0.003	Father_1886-1940	rs7945438	11	87783280	G	309000	0.01271	0.003587	0.0003965	0.001123
0.003	Father_1886-1940	rs958715	11	103737389	A	309000	-0.009055	0.002685	0.0007453	0.001926
0.003	Father_1886-1940	rs988748	11	27724745	G	308000	0.01012	0.003118	0.001167	0.002827
0.003	Father_1886-1940	rs10099	12	51487882	A	309000	-0.01138	0.003002	0.000149	0.0004868
0.003	Father_1886-1940	rs10160961	12	70837853	A	309000	-0.0278	0.00837	0.0008956	0.002254
0.003	Father_1886-1940	rs10444491	12	121876558	G	309000	0.008904	0.002615	0.0006608	0.001738
0.003	Father_1886-1940	rs10492202	12	68341738	A	309000	-0.02643	0.007979	0.0009243	0.002316
0.003	Father_1886-1940	rs10841520	12	20586395	A	261000	0.01256	0.003416	0.0002371	0.0007239
0.003	Father_1886-1940	rs10841537	12	20605573	G	308000	-0.01053	0.003019	0.0004858	0.001336
0.003	Father_1886-1940	rs10842678	12	26272824	A	309000	0.009457	0.002584	0.0002518	0.0007619
0.003	Father_1886-1940	rs10875739	12	48480919	G	308000	-0.00841	0.00255	0.0009733	0.002421
0.003	Father_1886-1940	rs11044761	12	19829482	G	305000	0.009867	0.003038	0.001165	0.002823
0.003	Father_1886-1940	rs11056435	12	15499636	A	309000	-0.01072	0.00304	0.0004201	0.00118
0.003	Father_1886-1940	rs11059915	12	129285007	A	309000	0.00977	0.002925	0.0008364	0.002126
0.003	Father_1886-1940	rs11065934	12	111946837	A	288000	-0.04467	0.01232	0.0002894	0.0008581
0.003	Father_1886-1940	rs11104044	12	77575684	A	309000	0.01788	0.005262	0.0006781	0.001777
0.003	Father_1886-1940	rs11104412	12	77635890	A	309000	0.01123	0.002786	5.561e-05	0.0002099
0.003	Father_1886-1940	rs11113298	12	107781301	A	309000	0.01944	0.00596	0.001111	0.002711
0.003	Father_1886-1940	rs11116423	12	84884498	G	309000	0.008804	0.002552	0.000561	0.001511
0.003	Father_1886-1940	rs1113483	12	102710684	A	309000	0.008887	0.002548	0.000486	0.001337
0.003	Father_1886-1940	rs11176925	12	68281795	A	309000	-0.008407	0.002553	0.0009914	0.002459
0.003	Father_1886-1940	rs11177441	12	69399780	G	309000	0.009077	0.002793	0.001154	0.0028
0.003	Father_1886-1940	rs1175594	12	77552067	C	308000	0.008948	0.002718	0.0009961	0.002469
0.003	Father_1886-1940	rs1182933	12	121454622	A	309000	-0.01036	0.002764	0.0001796	0.0005709
0.003	Father_1886-1940	rs12317689	12	67556780	A	309000	0.01673	0.004737	0.0004123	0.001161
0.003	Father_1886-1940	rs12369443	12	20582651	G	306000	0.0142	0.003212	9.919e-06	4.828e-05
0.003	Father_1886-1940	rs12579002	12	15409959	G	309000	-0.008971	0.002681	0.0008208	0.002092
0.003	Father_1886-1940	rs1468795	12	68250370	G	309000	-0.01059	0.002962	0.000349	0.001007
0.003	Father_1886-1940	rs1471506	12	26310234	A	309000	0.01502	0.004402	0.0006448	0.001702
0.003	Father_1886-1940	rs1544681	12	68249369	A	309000	-0.01001	0.002857	0.0004565	0.001267
0.003	Father_1886-1940	rs1579244	12	97846542	C	309000	-0.01582	0.004703	0.0007721	0.001986
0.003	Father_1886-1940	rs17034439	12	104126668	A	309000	-0.01377	0.003898	0.000411	0.001158
0.003	Father_1886-1940	rs17102790	12	67051115	G	309000	-0.01264	0.003734	0.0007114	0.001851
0.003	Father_1886-1940	rs17781466	12	67595050	G	309000	0.02013	0.005421	0.0002044	0.0006377
0.003	Father_1886-1940	rs17834697	12	2941626	A	309000	-0.01554	0.004551	0.0006404	0.001692
0.003	Father_1886-1940	rs1863538	12	107743775	A	309000	0.00995	0.00257	0.0001081	0.0003701
0.003	Father_1886-1940	rs1920438	12	67873425	A	309000	-0.01208	0.003696	0.001079	0.002644
0.003	Father_1886-1940	rs215389	12	47764433	A	309000	0.01056	0.003039	0.0005108	0.001395
0.003	Father_1886-1940	rs2231696	12	69651700	G	259000	0.03363	0.009879	0.0006648	0.001747
0.003	Father_1886-1940	rs2240191	12	113335731	A	309000	0.01233	0.003336	0.0002178	0.0006731
0.003	Father_1886-1940	rs2374689	12	107674370	G	309000	-0.00847	0.002543	0.0008675	0.002194
0.003	Father_1886-1940	rs2417821	12	20190268	G	309000	0.009784	0.00283	0.0005468	0.001478
0.003	Father_1886-1940	rs2583230	12	104407441	G	306000	-0.008977	0.00273	0.001007	0.002492
0.003	Father_1886-1940	rs269806	12	65393186	G	309000	0.01059	0.002842	0.0001942	0.0006104
0.003	Father_1886-1940	rs2948	12	16187632	G	309000	0.0147	0.004178	0.0004351	0.001216
0.003	Father_1886-1940	rs2970822	12	4555754	G	309000	0.01006	0.003005	0.0008121	0.002073
0.003	Father_1886-1940	rs4240718	12	80811051	A	261000	-0.02822	0.006381	9.762e-06	4.763e-05
0.003	Father_1886-1940	rs4540907	12	131741531	G	298000	-0.01352	0.003681	0.0002413	0.0007348
0.003	Father_1886-1940	rs4542481	12	80814405	G	307000	-0.01224	0.003598	0.0006696	0.001758
0.003	Father_1886-1940	rs4759324	12	54471280	A	308000	0.008446	0.002559	0.000964	0.002401
0.003	Father_1886-1940	rs4760541	12	129210149	A	309000	-0.01111	0.002809	7.617e-05	0.0002745
0.003	Father_1886-1940	rs4762755	12	20595535	G	309000	-0.00935	0.002566	0.0002684	0.0008047
0.003	Father_1886-1940	rs4762758	12	20614659	G	308000	-0.0097	0.002563	0.0001538	0.0005001
0.003	Father_1886-1940	rs4919730	12	53384547	C	309000	-0.01354	0.003673	0.0002288	0.000702
0.003	Father_1886-1940	rs6580968	12	54261440	G	309000	-0.008553	0.002584	0.0009315	0.002331
0.003	Father_1886-1940	rs7134071	12	26041050	G	308000	-0.0106	0.003099	0.0006288	0.001666
0.003	Father_1886-1940	rs7136159	12	66995764	A	309000	-0.01108	0.003232	0.0006057	0.001613
0.003	Father_1886-1940	rs7139244	12	20180798	G	308000	0.01142	0.003016	0.0001524	0.0004962
0.003	Father_1886-1940	rs7297245	12	96374614	G	309000	0.01031	0.003059	0.0007524	0.001942
0.003	Father_1886-1940	rs7301138	12	68293351	G	309000	0.009017	0.002546	0.0003976	0.001126
0.003	Father_1886-1940	rs7306772	12	89914142	A	309000	0.01002	0.00281	0.0003605	0.001035
0.003	Father_1886-1940	rs7308929	12	10038205	A	306000	-0.01768	0.005367	0.0009891	0.002454
0.003	Father_1886-1940	rs7358598	12	26285545	A	309000	0.01892	0.005653	0.0008191	0.002089
0.003	Father_1886-1940	rs7485334	12	20592201	C	306000	0.009539	0.002803	0.0006676	0.001753
0.003	Father_1886-1940	rs7485410	12	20629764	A	309000	-0.01754	0.005415	0.001196	0.002887
0.003	Father_1886-1940	rs7958562	12	107737408	G	309000	-0.01053	0.002714	0.0001045	0.0003595
0.003	Father_1886-1940	rs7959346	12	68287907	G	308000	-0.008752	0.002548	0.0005922	0.001583
0.003	Father_1886-1940	rs7962446	12	20600312	G	309000	-0.009988	0.002934	0.0006634	0.001744
0.003	Father_1886-1940	rs7979473	12	121420260	A	309000	-0.00915	0.002606	0.0004457	0.001241
0.003	Father_1886-1940	rs7979579	12	96987179	C	306000	0.01431	0.003804	0.0001681	0.0005397
0.003	Father_1886-1940	rs969014	12	118249893	G	309000	-0.01825	0.005458	0.0008279	0.002108
0.003	Father_1886-1940	rs1022876	13	107987382	A	309000	0.009641	0.002562	0.0001675	0.000538
0.003	Father_1886-1940	rs11618559	13	96995052	A	309000	0.01504	0.004217	0.0003616	0.001038
0.003	Father_1886-1940	rs12184772	13	110847746	G	309000	-0.01141	0.003142	0.0002832	0.0008426
0.003	Father_1886-1940	rs12863447	13	110354297	A	308000	-0.01151	0.003535	0.00113	0.002751
0.003	Father_1886-1940	rs1355478	13	31838560	A	309000	-0.01836	0.005672	0.00121	0.002917
0.003	Father_1886-1940	rs1387784	13	85804087	A	297000	-0.01364	0.004151	0.001018	0.002517
0.003	Father_1886-1940	rs1395354	13	71616919	G	308000	-0.01809	0.004928	0.0002412	0.0007346
0.003	Father_1886-1940	rs17074998	13	31334628	G	308000	-0.02028	0.006275	0.001233	0.002963
0.003	Father_1886-1940	rs17088403	13	72264583	A	309000	-0.03616	0.0107	0.0007241	0.00188
0.003	Father_1886-1940	rs1855248	13	64188988	G	308000	-0.01939	0.00561	0.0005464	0.001477
0.003	Father_1886-1940	rs1931349	13	108845598	A	308000	0.01086	0.002869	0.0001528	0.0004975
0.003	Father_1886-1940	rs1999165	13	34509474	G	307000	0.01357	0.00412	0.0009896	0.002455
0.003	Father_1886-1940	rs2018259	13	53523952	A	309000	-0.009381	0.002888	0.00116	0.002813
0.003	Father_1886-1940	rs2409582	13	55468512	G	309000	-0.01927	0.00577	0.0008394	0.002133
0.003	Father_1886-1940	rs2451432	13	85875591	A	309000	-0.01563	0.004797	0.001123	0.002737
0.003	Father_1886-1940	rs2721052	13	41109040	A	308000	0.009109	0.002552	0.0003581	0.001029
0.003	Father_1886-1940	rs298835	13	63865669	A	309000	0.009115	0.002682	0.0006794	0.00178
0.003	Father_1886-1940	rs3783238	13	103713958	C	309000	0.009991	0.002733	0.0002563	0.0007735
0.003	Father_1886-1940	rs4245332	13	45667725	G	308000	0.01515	0.004541	0.0008488	0.002153
0.003	Father_1886-1940	rs4255644	13	111089573	A	309000	0.009356	0.002872	0.001121	0.002732
0.003	Father_1886-1940	rs593564	13	110871759	A	309000	-0.009911	0.002555	0.0001049	0.0003608
0.003	Father_1886-1940	rs596218	13	64008285	A	308000	-0.01288	0.003773	0.000642	0.001696
0.003	Father_1886-1940	rs7321093	13	29147841	G	309000	-0.008492	0.002537	0.0008159	0.002082
0.003	Father_1886-1940	rs7321225	13	77407434	G	309000	-0.01247	0.003828	0.001128	0.002746
0.003	Father_1886-1940	rs7337104	13	31740629	A	309000	-0.01634	0.004949	0.0009621	0.002397
0.003	Father_1886-1940	rs7991590	13	104186377	G	309000	-0.02303	0.006805	0.0007151	0.00186
0.003	Father_1886-1940	rs7992404	13	34825686	A	305000	-0.009516	0.002837	0.0007955	0.002037
0.003	Father_1886-1940	rs809164	13	71630110	A	309000	-0.02049	0.006228	0.001001	0.002479
0.003	Father_1886-1940	rs828197	13	91374565	G	307000	-0.05258	0.01352	0.0001013	0.0003503
0.003	Father_1886-1940	rs9317196	13	23341126	A	309000	0.008801	0.002673	0.0009913	0.002459
0.003	Father_1886-1940	rs9506891	13	23175938	G	309000	0.009243	0.002835	0.001112	0.002713
0.003	Father_1886-1940	rs9514663	13	107983805	A	306000	0.008288	0.002558	0.001197	0.002889
0.003	Father_1886-1940	rs9514667	13	108013938	A	309000	0.009709	0.00256	0.000149	0.0004868
0.003	Father_1886-1940	rs9521686	13	110954510	A	309000	0.009362	0.00286	0.001064	0.002613
0.003	Father_1886-1940	rs9524523	13	95150240	A	309000	-0.008729	0.002571	0.0006851	0.001793
0.003	Father_1886-1940	rs9525927	13	44842503	G	309000	-0.01065	0.003215	0.0009204	0.002308
0.003	Father_1886-1940	rs9528021	13	60218316	C	309000	-0.01529	0.00466	0.001037	0.002555
0.003	Father_1886-1940	rs9533298	13	43478867	A	309000	-0.01078	0.003332	0.00122	0.002938
0.003	Father_1886-1940	rs9540226	13	65383941	G	309000	0.01114	0.003365	0.0009255	0.002319
0.003	Father_1886-1940	rs9547669	13	37374156	A	309000	-0.009375	0.002674	0.0004543	0.001262
0.003	Father_1886-1940	rs9557071	13	99440021	G	309000	0.01064	0.002919	0.0002663	0.0007994
0.003	Father_1886-1940	rs9562556	13	32785818	G	309000	-0.02149	0.006069	0.000399	0.001129
0.003	Father_1886-1940	rs9563936	13	34502857	A	309000	0.01327	0.003946	0.0007716	0.001984
0.003	Father_1886-1940	rs9576847	13	40118575	G	308000	0.01502	0.004547	0.000955	0.002382
0.003	Father_1886-1940	rs9577754	13	113089165	C	308000	0.01564	0.00416	0.0001709	0.0005471
0.003	Father_1886-1940	rs9580831	13	24604974	A	309000	-0.02378	0.006968	0.0006433	0.001699
0.003	Father_1886-1940	rs9591988	13	59927529	A	309000	0.01054	0.003199	0.0009862	0.002448
0.003	Father_1886-1940	rs10047808	14	36925048	A	309000	-0.008749	0.002565	0.0006489	0.001711
0.003	Father_1886-1940	rs10129747	14	77433198	A	309000	-0.008298	0.002545	0.001113	0.002716
0.003	Father_1886-1940	rs10134291	14	70474008	A	309000	-0.009256	0.00275	0.0007616	0.001963
0.003	Father_1886-1940	rs10146772	14	68878369	A	309000	-0.008668	0.002563	0.0007189	0.001868
0.003	Father_1886-1940	rs10873476	14	97362492	A	309000	0.009556	0.002873	0.0008808	0.002223
0.003	Father_1886-1940	rs11622328	14	65640434	A	309000	0.01506	0.004417	0.0006508	0.001716
0.003	Father_1886-1940	rs11626004	14	59262459	G	307000	-0.01145	0.003176	0.000312	0.000915
0.003	Father_1886-1940	rs12050225	14	59259791	A	308000	-0.009331	0.002764	0.0007375	0.001909
0.003	Father_1886-1940	rs1209485	14	56959440	G	309000	-0.009019	0.002549	0.000403	0.001139
0.003	Father_1886-1940	rs12432194	14	24636025	A	309000	-0.0137	0.003386	5.193e-05	0.000198
0.003	Father_1886-1940	rs12434638	14	90610080	A	309000	0.008655	0.002635	0.001023	0.002526
0.003	Father_1886-1940	rs12437323	14	40015976	G	309000	-0.01058	0.002882	0.0002424	0.0007375
0.003	Father_1886-1940	rs12878010	14	73271879	A	309000	0.01084	0.002798	0.0001073	0.0003678
0.003	Father_1886-1940	rs12881294	14	77449435	G	309000	-0.01256	0.003286	0.0001328	0.0004411
0.003	Father_1886-1940	rs12889970	14	90156773	A	309000	0.01046	0.00321	0.001122	0.002734
0.003	Father_1886-1940	rs1551767	14	25659402	A	309000	0.01407	0.004002	0.0004379	0.001223
0.003	Father_1886-1940	rs17095088	14	59240410	A	309000	-0.01374	0.003552	0.0001093	0.0003737
0.003	Father_1886-1940	rs17111162	14	41279247	G	308000	0.01851	0.005412	0.0006238	0.001655
0.003	Father_1886-1940	rs1861084	14	92358954	G	309000	-0.01024	0.002792	0.0002446	0.0007434
0.003	Father_1886-1940	rs1884065	14	97488362	A	309000	0.009775	0.002741	0.0003623	0.00104
0.003	Father_1886-1940	rs1952966	14	32438484	A	309000	-0.008857	0.00254	0.0004892	0.001344
0.003	Father_1886-1940	rs1990443	14	73272915	A	309000	0.01042	0.002893	0.0003146	0.0009215
0.003	Father_1886-1940	rs2071047	14	54418411	A	309000	-0.008648	0.002579	0.0007993	0.002045
0.003	Father_1886-1940	rs2080577	14	77432572	A	309000	-0.01026	0.002745	0.0001858	0.0005878
0.003	Father_1886-1940	rs2160080	14	92374487	C	309000	-0.01151	0.003262	0.0004166	0.001172
0.003	Father_1886-1940	rs2185492	14	69765077	A	309000	-0.008843	0.002633	0.0007819	0.002007
0.003	Father_1886-1940	rs2185493	14	69770440	A	309000	-0.009243	0.00254	0.0002742	0.0008196
0.003	Father_1886-1940	rs2430342	14	92344244	G	309000	-0.008555	0.002641	0.001199	0.002893
0.003	Father_1886-1940	rs3813405	14	57352640	A	309000	0.008933	0.002544	0.0004465	0.001243
0.003	Father_1886-1940	rs4640079	14	32438841	A	309000	-0.009806	0.002774	0.0004076	0.00115
0.003	Father_1886-1940	rs4641666	14	95812477	A	309000	-0.01023	0.002966	0.0005607	0.00151
0.003	Father_1886-1940	rs4899342	14	70728094	A	309000	0.008837	0.002686	0.001003	0.002484
0.003	Father_1886-1940	rs4899633	14	77484210	C	309000	-0.01216	0.003759	0.001218	0.002933
0.003	Father_1886-1940	rs4901617	14	56351774	A	309000	-0.02888	0.007884	0.0002491	0.000755
0.003	Father_1886-1940	rs4902110	14	62624957	A	309000	-0.01114	0.003406	0.001068	0.002621
0.003	Father_1886-1940	rs4905373	14	42656202	A	309000	-0.01595	0.004313	0.0002181	0.000674
0.003	Father_1886-1940	rs4981146	14	32454372	G	305000	-0.01048	0.002889	0.0002855	0.0008484
0.003	Father_1886-1940	rs6573939	14	70690955	A	309000	0.008972	0.002563	0.0004655	0.001288
0.003	Father_1886-1940	rs7159694	14	85864692	G	309000	-0.008367	0.002589	0.00123	0.002957
0.003	Father_1886-1940	rs755566	14	95823870	G	309000	-0.01006	0.00306	0.00101	0.0025
0.003	Father_1886-1940	rs758915	14	73247540	A	309000	0.0109	0.003258	0.0008222	0.002095
0.003	Father_1886-1940	rs766023	14	79636437	G	309000	-0.008439	0.002613	0.001237	0.002973
0.003	Father_1886-1940	rs8012446	14	35202975	G	309000	-0.01168	0.003328	0.0004498	0.001251
0.003	Father_1886-1940	rs8018103	14	97388444	A	309000	0.009704	0.002992	0.001181	0.002857
0.003	Father_1886-1940	rs8022538	14	62651413	A	309000	-0.01107	0.003424	0.001231	0.002961
0.003	Father_1886-1940	rs875989	14	94842145	A	309000	0.01268	0.003684	0.0005791	0.001553
0.003	Father_1886-1940	rs9671833	14	41932816	G	309000	-0.008776	0.002688	0.001094	0.002675
0.003	Father_1886-1940	rs9672030	14	48387621	A	300000	-0.01559	0.00465	0.0008036	0.002055
0.003	Father_1886-1940	rs972396	14	32435312	G	308000	0.009067	0.002545	0.0003662	0.001049
0.003	Father_1886-1940	rs11632936	15	69104434	A	309000	-0.01134	0.00274	3.489e-05	0.0001411
0.003	Father_1886-1940	rs11633223	15	78935476	G	303000	0.008932	0.002629	0.00068	0.001781
0.003	Father_1886-1940	rs11858379	15	31947951	G	309000	-0.01198	0.002995	6.364e-05	0.0002355
0.003	Father_1886-1940	rs12148317	15	69582620	C	309000	-0.01102	0.003107	0.0003909	0.00111
0.003	Father_1886-1940	rs12148567	15	31437967	C	309000	-0.01318	0.003896	0.0007186	0.001867
0.003	Father_1886-1940	rs12476	15	67493726	G	309000	0.01104	0.003008	0.0002424	0.0007377
0.003	Father_1886-1940	rs12595811	15	69171891	G	307000	-0.01106	0.002652	3.031e-05	0.0001251
0.003	Father_1886-1940	rs12908729	15	31830739	A	309000	-0.0105	0.003029	0.0005264	0.001431
0.003	Father_1886-1940	rs12910991	15	85467070	G	309000	0.01092	0.002663	4.141e-05	0.0001632
0.003	Father_1886-1940	rs12916138	15	71631920	G	309000	0.0085	0.00255	0.0008572	0.002171
0.003	Father_1886-1940	rs1393849	15	69596069	A	309000	-0.009797	0.00286	0.0006143	0.001633
0.003	Father_1886-1940	rs1394371	15	78724469	A	309000	-0.01353	0.002814	1.526e-06	9.807e-06
0.003	Father_1886-1940	rs1509408	15	56286313	C	309000	0.009555	0.002929	0.001107	0.002702
0.003	Father_1886-1940	rs16953674	15	69563174	A	309000	-0.01153	0.002664	1.495e-05	6.848e-05
0.003	Father_1886-1940	rs17116771	15	23907160	A	309000	-0.01071	0.003305	0.001199	0.002893
0.003	Father_1886-1940	rs17816055	15	31832094	A	309000	0.008871	0.002728	0.001144	0.00278
0.003	Father_1886-1940	rs17821226	15	58623328	A	261000	0.01003	0.003033	0.0009385	0.002347
0.003	Father_1886-1940	rs1874835	15	28044300	A	309000	-0.01393	0.004015	0.0005207	0.001418
0.003	Father_1886-1940	rs1982754	15	81081617	A	309000	-0.009782	0.002854	0.0006082	0.001619
0.003	Father_1886-1940	rs2007540	15	78429340	G	309000	-0.01292	0.003945	0.001052	0.002587
0.003	Father_1886-1940	rs2046390	15	81011993	A	309000	0.01487	0.004202	0.0004022	0.001137
0.003	Father_1886-1940	rs2117550	15	62877406	A	308000	-0.01148	0.003288	0.0004786	0.001319
0.003	Father_1886-1940	rs2170878	15	81014981	A	309000	0.01587	0.004427	0.000336	0.0009749
0.003	Father_1886-1940	rs2219507	15	31859635	A	298000	-0.0141	0.003137	6.946e-06	3.564e-05
0.003	Father_1886-1940	rs2306022	15	68628163	A	308000	0.01809	0.004568	7.45e-05	0.0002694
0.003	Father_1886-1940	rs2415037	15	69600659	A	309000	-0.0107	0.002629	4.753e-05	0.0001836
0.003	Father_1886-1940	rs261301	15	58686939	A	309000	-0.01209	0.003673	0.001001	0.00248
0.003	Father_1886-1940	rs3909563	15	95181809	G	307000	0.0186	0.00483	0.0001172	0.0003965
0.003	Father_1886-1940	rs4605119	15	80345756	G	309000	0.008872	0.002632	0.0007479	0.001932
0.003	Father_1886-1940	rs4777120	15	69424143	G	308000	-0.01069	0.002682	6.718e-05	0.0002466
0.003	Father_1886-1940	rs4779910	15	31947042	A	309000	-0.01107	0.003104	0.000361	0.001037
0.003	Father_1886-1940	rs7164188	15	32086180	G	306000	-0.01017	0.002975	0.0006286	0.001665
0.003	Father_1886-1940	rs7170060	15	31897837	G	308000	-0.01345	0.003228	3.092e-05	0.0001272
0.003	Father_1886-1940	rs7173826	15	67528374	C	309000	0.009906	0.002717	0.0002658	0.000798
0.003	Father_1886-1940	rs7176782	15	69477380	G	309000	-0.01006	0.002618	0.0001217	0.0004094
0.003	Father_1886-1940	rs7177344	15	81004677	A	309000	0.01101	0.002887	0.0001381	0.0004561
0.003	Father_1886-1940	rs7181405	15	78948152	G	309000	0.01005	0.002631	0.000133	0.0004418
0.003	Father_1886-1940	rs7183244	15	67461311	A	309000	-0.0105	0.0026	5.377e-05	0.000204
0.003	Father_1886-1940	rs8038216	15	69590143	G	309000	-0.009004	0.00262	0.0005894	0.001576
0.003	Father_1886-1940	rs871505	15	69429674	G	309000	-0.0108	0.002574	2.725e-05	0.0001142
0.003	Father_1886-1940	rs905432	15	32067075	A	306000	-0.009543	0.002906	0.001024	0.002528
0.003	Father_1886-1940	rs931794	15	78826180	G	309000	-0.01581	0.00267	3.194e-09	5.168e-08
0.003	Father_1886-1940	rs993048	15	69179625	A	308000	-0.01146	0.002598	1.037e-05	5.013e-05
0.003	Father_1886-1940	rs10852521	16	53804965	A	309000	0.009529	0.002543	0.0001789	0.000569
0.003	Father_1886-1940	rs11074528	16	22939240	C	309000	-0.01176	0.003453	0.000662	0.001741
0.003	Father_1886-1940	rs12444562	16	87657494	A	307000	-0.01364	0.003922	0.000507	0.001386
0.003	Father_1886-1940	rs12929546	16	20981162	G	309000	-0.01453	0.004288	0.0007023	0.001831
0.003	Father_1886-1940	rs16953243	16	54274354	C	309000	0.01055	0.003165	0.0008625	0.002183
0.003	Father_1886-1940	rs16958988	16	83007449	A	309000	0.01037	0.00287	0.0003022	0.0008905
0.003	Father_1886-1940	rs16972698	16	73894315	G	309000	-0.03759	0.01049	0.0003371	0.0009777
0.003	Father_1886-1940	rs17253832	16	54274562	G	309000	0.015	0.003774	7.065e-05	0.0002575
0.003	Father_1886-1940	rs17579406	16	16088201	G	309000	-0.0141	0.003945	0.0003517	0.001014
0.003	Father_1886-1940	rs17682789	16	83014734	G	309000	0.009507	0.002792	0.0006624	0.001742
0.003	Father_1886-1940	rs2379054	16	51499412	C	309000	-0.01003	0.002981	0.00077	0.001981
0.003	Father_1886-1940	rs3785216	16	7713351	G	309000	0.01254	0.003724	0.000755	0.001948
0.003	Father_1886-1940	rs3924359	16	54913863	A	309000	-0.01938	0.005889	0.001001	0.002479
0.003	Father_1886-1940	rs401326	16	13207324	G	309000	-0.009067	0.002553	0.0003819	0.001088
0.003	Father_1886-1940	rs4392054	16	20722770	A	309000	-0.01517	0.004611	0.0009997	0.002477
0.003	Father_1886-1940	rs4783513	16	20943824	G	303000	-0.00941	0.002854	0.0009758	0.002426
0.003	Father_1886-1940	rs4787669	16	25047197	A	309000	0.008995	0.002704	0.0008791	0.002219
0.003	Father_1886-1940	rs6416610	16	20418452	G	309000	-0.01918	0.00575	0.0008517	0.00216
0.003	Father_1886-1940	rs7190492	16	53828752	A	308000	0.008863	0.002638	0.0007811	0.002005
0.003	Father_1886-1940	rs7198770	16	20810730	G	309000	0.01137	0.002832	5.953e-05	0.0002225
0.003	Father_1886-1940	rs7498582	16	20623688	G	307000	-0.01112	0.003231	0.0005784	0.001551
0.003	Father_1886-1940	rs7499304	16	20564390	A	308000	0.009755	0.002786	0.000462	0.00128
0.003	Father_1886-1940	rs951379	16	65549562	G	309000	0.008793	0.002551	0.0005685	0.001528
0.003	Father_1886-1940	rs9933029	16	68303410	A	309000	0.008923	0.002614	0.000642	0.001696
0.003	Father_1886-1940	rs9936937	16	8182998	G	309000	-0.01622	0.004983	0.001135	0.002761
0.003	Father_1886-1940	rs1052586	17	45018463	G	306000	0.01081	0.002569	2.56e-05	0.0001083
0.003	Father_1886-1940	rs12942507	17	12037808	A	309000	-0.009878	0.002737	0.0003079	0.0009048
0.003	Father_1886-1940	rs17730919	17	52121998	A	305000	-0.009412	0.002757	0.0006413	0.001694
0.003	Father_1886-1940	rs1805467	17	5393461	G	309000	-0.01033	0.002957	0.0004768	0.001315
0.003	Father_1886-1940	rs2072255	17	12852392	A	309000	-0.01574	0.004502	0.0004717	0.001303
0.003	Father_1886-1940	rs2316758	17	45066365	G	309000	-0.008778	0.002549	0.0005726	0.001538
0.003	Father_1886-1940	rs2364979	17	65445565	G	309000	0.009957	0.00254	8.87e-05	0.0003126
0.003	Father_1886-1940	rs3027208	17	8014308	A	309000	-0.01354	0.003525	0.0001219	0.0004102
0.003	Father_1886-1940	rs3027209	17	8014416	G	309000	-0.01342	0.003296	4.663e-05	0.0001806
0.003	Father_1886-1940	rs365654	17	32677709	A	309000	-0.01256	0.003625	0.0005315	0.001443
0.003	Father_1886-1940	rs4247360	17	65445256	A	309000	-0.01005	0.002653	0.0001515	0.0004938
0.003	Father_1886-1940	rs4462650	17	31786095	A	303000	0.00856	0.002581	0.0009112	0.002288
0.003	Father_1886-1940	rs4794173	17	48725515	G	309000	-0.009781	0.002856	0.0006145	0.001634
0.003	Father_1886-1940	rs7214877	17	2414208	G	309000	-0.01018	0.002902	0.0004505	0.001253
0.003	Father_1886-1940	rs7216950	17	45088455	G	309000	-0.00937	0.002539	0.0002233	0.0006877
0.003	Father_1886-1940	rs758391	17	45017241	A	309000	-0.01008	0.002542	7.311e-05	0.0002651
0.003	Father_1886-1940	rs8074370	17	76957331	A	306000	-0.01182	0.003633	0.00114	0.002771
0.003	Father_1886-1940	rs8078251	17	78334206	G	309000	-0.009454	0.00276	0.0006137	0.001632
0.003	Father_1886-1940	rs9909944	17	29829622	G	309000	-0.00935	0.002555	0.0002522	0.0007631
0.003	Father_1886-1940	rs9916398	17	5398234	G	309000	-0.009997	0.003076	0.001156	0.002804
0.003	Father_1886-1940	rs1074347	18	9285892	A	309000	0.00957	0.002572	0.0001982	0.0006211
0.003	Father_1886-1940	rs11082408	18	42358698	A	309000	-0.01255	0.003519	0.0003626	0.001041
0.003	Father_1886-1940	rs1153621	18	55040386	A	298000	-0.01228	0.003436	0.0003498	0.001009
0.003	Father_1886-1940	rs1153623	18	55028651	G	309000	-0.01351	0.003577	0.0001591	0.0005147
0.003	Father_1886-1940	rs11664790	18	6567538	A	309000	-0.009215	0.002666	0.0005463	0.001477
0.003	Father_1886-1940	rs12456880	18	846744	G	309000	-0.01115	0.003102	0.0003272	0.000953
0.003	Father_1886-1940	rs12608148	18	889159	A	309000	-0.009485	0.002859	0.00091	0.002285
0.003	Father_1886-1940	rs12962880	18	47460980	A	309000	-0.01029	0.003044	0.0007216	0.001874
0.003	Father_1886-1940	rs1692526	18	26250461	C	309000	-0.00825	0.002544	0.001185	0.002865
0.003	Father_1886-1940	rs17069840	18	60009035	G	309000	0.02044	0.005705	0.0003391	0.0009827
0.003	Father_1886-1940	rs17497377	18	9092233	C	307000	0.01903	0.004784	6.967e-05	0.0002544
0.003	Father_1886-1940	rs1910346	18	5057720	A	309000	-0.008619	0.002558	0.0007527	0.001943
0.003	Father_1886-1940	rs2169517	18	49244753	A	309000	0.0293	0.008571	0.0006283	0.001665
0.003	Father_1886-1940	rs2588489	18	53701841	A	309000	-0.01304	0.003985	0.001068	0.002622
0.003	Father_1886-1940	rs269985	18	42785997	A	309000	0.01366	0.003307	3.602e-05	0.0001449
0.003	Father_1886-1940	rs35748167	18	58037433	G	309000	0.02979	0.009152	0.001135	0.002762
0.003	Father_1886-1940	rs4798049	18	307022	A	309000	0.009602	0.00295	0.001136	0.002762
0.003	Father_1886-1940	rs597741	18	55204476	A	309000	-0.008649	0.002673	0.001216	0.002928
0.003	Father_1886-1940	rs632491	18	6033403	A	292000	-0.009138	0.002825	0.001219	0.002935
0.003	Father_1886-1940	rs7234316	18	28875465	A	308000	-0.04721	0.01255	0.0001696	0.0005436
0.003	Father_1886-1940	rs7239756	18	276848	G	306000	0.008929	0.002629	0.0006844	0.001791
0.003	Father_1886-1940	rs8089498	18	42748365	G	309000	0.01052	0.002959	0.0003796	0.001082
0.003	Father_1886-1940	rs8091765	18	866138	C	308000	-0.009401	0.002742	0.0006075	0.001618
0.003	Father_1886-1940	rs9945789	18	42421259	A	309000	-0.02105	0.004951	2.124e-05	9.238e-05
0.003	Father_1886-1940	rs9946176	18	9181546	A	309000	-0.00957	0.002684	0.0003635	0.001043
0.003	Father_1886-1940	rs9958503	18	55211222	A	309000	0.01339	0.004013	0.0008493	0.002154
0.003	Father_1886-1940	rs9962039	18	65586674	A	309000	-0.01864	0.005553	0.0007889	0.002022
0.003	Father_1886-1940	rs9965257	18	4944457	G	308000	-0.0164	0.004915	0.0008509	0.002158
0.003	Father_1886-1940	rs9967042	18	38073614	A	306000	-0.01811	0.005113	0.0003974	0.001125
0.003	Father_1886-1940	rs11085438	19	21427377	A	309000	0.01067	0.002551	2.899e-05	0.0001204
0.003	Father_1886-1940	rs11574806	19	18652521	A	306000	-0.04531	0.01394	0.001151	0.002794
0.003	Father_1886-1940	rs11670988	19	40886993	A	309000	0.01373	0.004226	0.001164	0.002821
0.003	Father_1886-1940	rs11878982	19	5041049	A	309000	0.01003	0.003042	0.0009775	0.00243
0.003	Father_1886-1940	rs12462360	19	36302921	G	308000	-0.009375	0.002878	0.001123	0.002737
0.003	Father_1886-1940	rs17755118	19	2514732	A	309000	-0.01406	0.003933	0.0003504	0.001011
0.003	Father_1886-1940	rs2255598	19	24457120	G	307000	-0.02165	0.004933	1.137e-05	5.426e-05
0.003	Father_1886-1940	rs2306199	19	8320890	C	309000	0.009607	0.002597	0.0002166	0.0006699
0.003	Father_1886-1940	rs260424	19	58726569	A	301000	-0.01577	0.004592	0.0005957	0.001591
0.003	Father_1886-1940	rs2968084	19	21615899	A	309000	0.008561	0.002549	0.0007836	0.002011
0.003	Father_1886-1940	rs3046	19	44124735	G	309000	-0.008563	0.002547	0.000774	0.00199
0.003	Father_1886-1940	rs304723	19	44102338	A	309000	-0.009275	0.002736	0.0006995	0.001825
0.003	Father_1886-1940	rs36247	19	8321946	G	308000	-0.01117	0.002711	3.776e-05	0.0001509
0.003	Father_1886-1940	rs36248	19	8321969	A	307000	-0.01056	0.003111	0.0006885	0.0018
0.003	Father_1886-1940	rs3817	19	44090195	A	309000	-0.008731	0.002551	0.0006212	0.001649
0.003	Father_1886-1940	rs3844117	19	24377672	A	309000	-0.0397	0.0114	0.000495	0.001358
0.003	Father_1886-1940	rs4805537	19	30765770	G	309000	-0.01203	0.003243	0.0002072	0.0006452
0.003	Father_1886-1940	rs4808209	19	19790159	C	309000	-0.02417	0.006163	8.788e-05	0.0003102
0.003	Father_1886-1940	rs4932742	19	24255633	A	307000	-0.01793	0.005368	0.0008393	0.002133
0.003	Father_1886-1940	rs6511720	19	11202306	A	309000	0.01561	0.003918	6.78e-05	0.0002486
0.003	Father_1886-1940	rs7257857	19	21579538	A	309000	0.009269	0.002544	0.0002686	0.0008052
0.003	Father_1886-1940	rs7258189	19	11169947	G	309000	0.009706	0.002646	0.0002439	0.0007416
0.003	Father_1886-1940	rs769449	19	45410002	A	304000	-0.0164	0.004009	4.308e-05	0.0001688
0.003	Father_1886-1940	rs8101643	19	21384253	G	309000	0.009909	0.002539	9.519e-05	0.0003321
0.003	Father_1886-1940	rs8103298	19	50223369	G	309000	-0.03166	0.008811	0.0003267	0.0009518
0.003	Father_1886-1940	rs10159380	1	91012109	A	307000	-0.01419	0.004221	0.0007758	0.001994
0.003	Father_1886-1940	rs1048334	1	16340761	A	309000	0.008499	0.002587	0.001017	0.002513
0.003	Father_1886-1940	rs10489239	1	170856852	A	309000	0.01034	0.00315	0.001025	0.002531
0.003	Father_1886-1940	rs10489655	1	79653433	A	309000	-0.0176	0.005172	0.0006654	0.001748
0.003	Father_1886-1940	rs10797386	1	3168280	A	309000	-0.02121	0.006415	0.0009466	0.002364
0.003	Father_1886-1940	rs10798302	1	173987798	G	309000	0.01126	0.00334	0.0007477	0.001932
0.003	Father_1886-1940	rs10863652	1	221923042	G	309000	-0.01016	0.003046	0.000847	0.002149
0.003	Father_1886-1940	rs10863825	1	210577134	G	307000	-0.01245	0.00363	0.0006008	0.001602
0.003	Father_1886-1940	rs10874521	1	102312848	G	309000	0.01092	0.002765	7.788e-05	0.0002798
0.003	Father_1886-1940	rs11118852	1	221940271	A	309000	-0.00986	0.002952	0.0008367	0.002127
0.003	Father_1886-1940	rs11121728	1	11468442	G	308000	0.008698	0.002587	0.0007727	0.001987
0.003	Father_1886-1940	rs11206803	1	56877509	A	309000	-0.01072	0.002543	2.504e-05	0.0001063
0.003	Father_1886-1940	rs11210259	1	73935251	A	309000	0.008753	0.002541	0.000571	0.001534
0.003	Father_1886-1940	rs11264477	1	156321154	A	309000	0.01051	0.002877	0.0002591	0.0007808
0.003	Father_1886-1940	rs11580294	1	209839374	A	309000	-0.01048	0.003147	0.0008715	0.002202
0.003	Father_1886-1940	rs11812029	1	20779003	A	309000	-0.01763	0.005252	0.000786	0.002016
0.003	Father_1886-1940	rs12047673	1	111823173	G	309000	0.01738	0.004997	0.0005052	0.001382
0.003	Father_1886-1940	rs12049265	1	213612779	A	309000	0.01143	0.003274	0.0004815	0.001326
0.003	Father_1886-1940	rs12061221	1	223701097	A	309000	0.01042	0.002689	0.0001064	0.0003652
0.003	Father_1886-1940	rs12069867	1	241048722	G	259000	-0.009176	0.002822	0.001149	0.002791
0.003	Father_1886-1940	rs12117918	1	102350747	A	309000	0.00897	0.002765	0.00118	0.002854
0.003	Father_1886-1940	rs12120479	1	191223734	A	309000	0.01008	0.002807	0.0003305	0.0009614
0.003	Father_1886-1940	rs12134730	1	102223728	G	309000	-0.01608	0.004714	0.000644	0.0017
0.003	Father_1886-1940	rs1218593	1	154925989	G	309000	0.03711	0.008499	1.263e-05	5.934e-05
0.003	Father_1886-1940	rs12734738	1	73492303	C	304000	0.009669	0.002858	0.0007173	0.001865
0.003	Father_1886-1940	rs12744291	1	66362971	G	309000	0.01029	0.002787	0.000221	0.0006816
0.003	Father_1886-1940	rs1275164	1	198894457	G	255000	-0.01051	0.003237	0.00117	0.002834
0.003	Father_1886-1940	rs12760605	1	66341764	A	308000	0.01296	0.003156	4.017e-05	0.0001591
0.003	Father_1886-1940	rs1288497	1	53762189	A	309000	-0.01431	0.003704	0.000112	0.0003814
0.003	Father_1886-1940	rs1295094	1	6095199	A	309000	0.01151	0.003488	0.000965	0.002403
0.003	Father_1886-1940	rs1325193	1	199244301	A	309000	-0.008462	0.002544	0.0008819	0.002225
0.003	Father_1886-1940	rs1338289	1	210519658	A	309000	-0.01419	0.00367	0.0001109	0.0003782
0.003	Father_1886-1940	rs1470436	1	102253545	G	308000	-0.008478	0.002548	0.0008789	0.002218
0.003	Father_1886-1940	rs1506982	1	154753697	C	309000	0.01622	0.004636	0.0004671	0.001292
0.003	Father_1886-1940	rs1697618	1	211073277	G	309000	0.01191	0.003113	0.0001314	0.0004374
0.003	Father_1886-1940	rs17107835	1	53536361	A	262000	-0.02855	0.008733	0.001079	0.002643
0.003	Father_1886-1940	rs17110370	1	94199666	A	309000	-0.01014	0.00313	0.001194	0.002882
0.003	Father_1886-1940	rs17185860	1	119372737	G	309000	0.01315	0.003858	0.0006521	0.001718
0.003	Father_1886-1940	rs17317033	1	209856626	C	309000	0.014	0.004201	0.0008619	0.002182
0.003	Father_1886-1940	rs17451403	1	66387487	A	308000	0.01324	0.002969	8.146e-06	4.082e-05
0.003	Father_1886-1940	rs17540656	1	115880132	G	309000	-0.008391	0.00256	0.001044	0.002571
0.003	Father_1886-1940	rs1870516	1	5072295	A	309000	0.009046	0.002793	0.001198	0.002891
0.003	Father_1886-1940	rs1888181	1	106860057	G	309000	0.009619	0.002557	0.0001687	0.0005411
0.003	Father_1886-1940	rs191735	1	241078810	A	309000	-0.008558	0.002601	0.001	0.002478
0.003	Father_1886-1940	rs1923812	1	191358099	A	309000	0.01218	0.003464	0.0004388	0.001225
0.003	Father_1886-1940	rs1937457	1	66446787	A	307000	0.01062	0.002822	0.0001669	0.0005364
0.003	Father_1886-1940	rs2647281	1	55724704	G	309000	-0.01991	0.005682	0.0004592	0.001273
0.003	Father_1886-1940	rs2782500	1	53764635	A	305000	-0.01484	0.003676	5.413e-05	0.0002051
0.003	Father_1886-1940	rs2811314	1	178619183	G	309000	-0.008933	0.002605	0.0006063	0.001615
0.003	Father_1886-1940	rs320439	1	213629078	A	309000	0.01195	0.003013	7.337e-05	0.0002659
0.003	Father_1886-1940	rs338564	1	184777079	A	309000	-0.01185	0.003216	0.0002277	0.0006992
0.003	Father_1886-1940	rs3753275	1	8425900	G	303000	0.01209	0.00334	0.0002942	0.0008702
0.003	Father_1886-1940	rs3761923	1	6098266	G	309000	0.01793	0.005514	0.00115	0.002791
0.003	Father_1886-1940	rs3765787	1	156754465	A	309000	0.01054	0.002906	0.0002862	0.0008502
0.003	Father_1886-1940	rs3819985	1	210622790	A	309000	-0.01203	0.003601	0.000834	0.002121
0.003	Father_1886-1940	rs3820224	1	203312556	A	309000	0.01277	0.003949	0.001222	0.002941
0.003	Father_1886-1940	rs390488	1	241068852	A	309000	-0.009246	0.00263	0.0004394	0.001226
0.003	Father_1886-1940	rs4253890	1	214609822	C	308000	0.01076	0.002888	0.000195	0.0006125
0.003	Father_1886-1940	rs4313369	1	66234139	G	308000	-0.01477	0.004327	0.0006403	0.001692
0.003	Father_1886-1940	rs4557937	1	66240846	G	257000	-0.009489	0.002824	0.0007774	0.001997
0.003	Father_1886-1940	rs4656671	1	169336617	A	309000	0.008549	0.00262	0.001104	0.002697
0.003	Father_1886-1940	rs4661061	1	156802657	A	309000	0.01048	0.002898	0.0002976	0.000879
0.003	Father_1886-1940	rs478513	1	55134487	A	307000	0.01086	0.002832	0.0001247	0.0004183
0.003	Father_1886-1940	rs480963	1	55136529	G	309000	0.01149	0.002797	3.98e-05	0.0001578
0.003	Father_1886-1940	rs4839130	1	111925349	A	309000	0.008578	0.00254	0.0007324	0.001898
0.003	Father_1886-1940	rs4844997	1	210486895	G	309000	-0.01424	0.003607	7.859e-05	0.000282
0.003	Father_1886-1940	rs4907956	1	102312703	A	301000	-0.008879	0.002645	0.000788	0.002021
0.003	Father_1886-1940	rs4915165	1	198970728	A	309000	-0.009406	0.002913	0.001241	0.00298
0.003	Father_1886-1940	rs4970777	1	110283785	G	309000	-0.0091	0.002567	0.000393	0.001115
0.003	Father_1886-1940	rs553314	1	90967306	A	309000	0.009587	0.002643	0.0002857	0.0008488
0.003	Father_1886-1940	rs595339	1	89042433	G	309000	-0.008274	0.002559	0.001223	0.002944
0.003	Father_1886-1940	rs598130	1	55138294	A	309000	0.01103	0.00295	0.0001849	0.0005854
0.003	Father_1886-1940	rs6427332	1	156796844	A	308000	0.01153	0.003037	0.000146	0.0004785
0.003	Father_1886-1940	rs6429530	1	245345109	A	309000	-0.01334	0.00393	0.0006921	0.001808
0.003	Father_1886-1940	rs6540546	1	209845370	G	309000	-0.01044	0.002838	0.0002336	0.0007146
0.003	Father_1886-1940	rs6588010	1	63634135	A	309000	0.01468	0.003709	7.541e-05	0.0002722
0.003	Father_1886-1940	rs6660541	1	11447805	A	309000	0.009027	0.00255	0.0004006	0.001133
[truncated: 5,180 more rows]

## Sheet: S_Table_9
GWA	chrm	bp	rsid	p_val_meta	sample_size_meta	p_val_anc	beta_anc	beta_se_anc	p_val_uk	beta_uk	beta_se_uk	het_pval_meta	effect_allele_anc
FatherMetal_Lifespan+AttainedAge	1	2027901	rs7513222	0.001107	698000	0.004703	0.007676	0.002715	0.023	0.0053486	0.00233709	0.5428	G
FatherMetal_Lifespan+AttainedAge	1	2038732	rs12410859	0.0006427	698000	0.009652	0.007378	0.002851	0.0065	0.00660915	0.00244032	0.8591	G
FatherMetal_Lifespan+AttainedAge	1	2082566	rs2257182	0.001283	698000	0.08594	0.004489	0.002614	0.0012	0.00714422	0.0022313	0.4631	A
FatherMetal_Lifespan+AttainedAge	1	2163568	rs263533	0.0008084	698000	0.05089	0.005042	0.002582	0.0013	0.00706465	0.0022043	0.5776	G
FatherMetal_Lifespan+AttainedAge	1	2173504	rs263526	0.0002446	698000	0.006036	0.007216	0.002628	0.0031	0.00656039	0.00223356	0.8838	A
FatherMetal_Lifespan+AttainedAge	1	2289321	rs903914	0.002196	698000	0.4939	0.002014	0.002943	7.5e-05	0.00994735	0.00248198	0.06039	G
FatherMetal_Lifespan+AttainedAge	1	2330190	rs6693447	0.0004266	698000	0.1069	0.004114	0.002551	0.00015	0.00833116	0.00218211	0.2565	A
FatherMetal_Lifespan+AttainedAge	1	3325037	rs2483225	6.327e-05	697000	0.002287	0.007786	0.002553	0.0015	0.00690425	0.00217472	0.8154	G
FatherMetal_Lifespan+AttainedAge	1	3336200	rs1984069	0.001683	698000	0.04122	-0.00625	0.003062	0.0048	-0.00782142	0.00274733	0.7955	A
FatherMetal_Lifespan+AttainedAge	1	3340855	rs4648500	0.001699	698000	0.17	-0.003619	0.002637	0.00059	-0.00788171	0.00228013	0.2758	C
FatherMetal_Lifespan+AttainedAge	1	4501911	rs12128230	0.002027	695000	0.1976	0.004378	0.003398	0.0006	0.00964394	0.00285006	0.2552	A
FatherMetal_Lifespan+AttainedAge	1	6079392	rs1295107	0.002229	698000	0.01556	0.006452	0.002667	0.019	0.00526153	0.00227564	0.7761	G
FatherMetal_Lifespan+AttainedAge	1	6095199	rs1295094	0.0009582	698000	0.000965	0.01151	0.003488	0.058	0.0055592	0.00300642	0.2451	G
FatherMetal_Lifespan+AttainedAge	1	6098266	rs3761923	0.001555	698000	0.00115	0.01793	0.005514	0.083	0.00830847	0.00492681	0.2212	A
FatherMetal_Lifespan+AttainedAge	1	8482078	rs301806	4.684e-05	698000	0.004218	0.007373	0.002577	0.00055	0.00767879	0.00220319	0.9455	A
FatherMetal_Lifespan+AttainedAge	1	8770883	rs7553298	0.002347	697000	0.4942	0.002123	0.003106	8.6e-05	0.0105466	0.00269337	0.06359	A
FatherMetal_Lifespan+AttainedAge	1	15520987	rs10927713	0.002365	698000	0.01506	0.008462	0.003481	0.021	0.00670173	0.00296183	0.7528	G
FatherMetal_Lifespan+AttainedAge	1	15548397	rs12124285	0.0008232	698000	0.01921	0.008369	0.003574	0.0044	0.00856641	0.00305979	0.9449	G
FatherMetal_Lifespan+AttainedAge	1	16001588	rs12746773	0.002272	698000	0.01922	0.006804	0.002906	0.016	0.00610756	0.00253209	0.8482	G
FatherMetal_Lifespan+AttainedAge	1	16340761	rs1048334	0.0002609	698000	0.001017	0.008499	0.002587	0.015	0.00550046	0.00221243	0.4049	G
FatherMetal_Lifespan+AttainedAge	1	16344858	rs945419	0.0005299	698000	0.0004928	0.008927	0.002562	0.049	0.00438556	0.00219076	0.2129	A
FatherMetal_Lifespan+AttainedAge	1	16348412	rs945425	0.0006344	698000	0.002222	0.008339	0.002726	0.022	0.00544131	0.00232778	0.4475	G
FatherMetal_Lifespan+AttainedAge	1	17763312	rs2800686	0.001119	698000	0.03449	0.005598	0.002648	0.0034	0.00669298	0.00226959	0.784	G
FatherMetal_Lifespan+AttainedAge	1	20859701	rs12074436	0.000139	698000	0.003834	-0.01613	0.00558	0.0024	-0.0142184	0.00473095	0.8411	G
FatherMetal_Lifespan+AttainedAge	1	25418010	rs311461	0.001865	695000	0.005109	0.007585	0.002709	0.038	0.00488176	0.00230662	0.4731	A
FatherMetal_Lifespan+AttainedAge	1	26901319	rs7726	0.002233	698000	0.009127	0.007632	0.002927	0.03	0.00563003	0.00254813	0.6046	G
FatherMetal_Lifespan+AttainedAge	1	27020012	rs4466675	0.0002123	698000	0.01448	-0.006386	0.002612	0.001	-0.00731615	0.00223903	0.7945	G
FatherMetal_Lifespan+AttainedAge	1	27068202	rs4970481	0.0002509	698000	0.08386	0.004488	0.002596	0.0001	0.00848944	0.00221079	0.2658	A
FatherMetal_Lifespan+AttainedAge	1	27180829	rs737524	5.967e-05	698000	0.007109	-0.006975	0.002591	0.00042	-0.00775658	0.00222033	0.8197	A
FatherMetal_Lifespan+AttainedAge	1	27182261	rs12747620	8.556e-05	698000	0.001958	-0.01062	0.00343	0.0025	-0.00880224	0.0029496	0.7256	A
FatherMetal_Lifespan+AttainedAge	1	27234682	rs12724052	1.785e-05	698000	0.01036	-0.009076	0.00354	4.9e-05	-0.0122078	0.00302503	0.525	G
FatherMetal_Lifespan+AttainedAge	1	27242009	rs11581460	0.0001214	698000	0.2538	0.002992	0.002622	2.5e-06	0.0104622	0.00223196	0.04486	G
FatherMetal_Lifespan+AttainedAge	1	27347994	rs11576827	0.001617	698000	0.5336	0.001631	0.002621	3.3e-05	0.00947548	0.00227358	0.042	C
FatherMetal_Lifespan+AttainedAge	1	27996472	rs12732199	0.001926	698000	0.03572	-0.005765	0.002745	0.0068	-0.00660318	0.00240591	0.8788	G
FatherMetal_Lifespan+AttainedAge	1	28282292	rs3813803	0.0007904	650000	0.006546	-0.0083	0.003053	0.011	-0.00620247	0.00239358	0.6065	A
FatherMetal_Lifespan+AttainedAge	1	28313993	rs11247734	0.002118	697000	0.3991	0.00234	0.002774	0.00013	0.00911241	0.00236967	0.09185	G
FatherMetal_Lifespan+AttainedAge	1	28344980	rs12144891	0.001693	698000	0.2271	0.003408	0.002822	0.00033	0.00869794	0.00240098	0.1949	A
FatherMetal_Lifespan+AttainedAge	1	29319480	rs2985327	0.0004001	698000	0.00649	-0.007623	0.0028	0.0053	-0.00683378	0.00242279	0.8164	A
FatherMetal_Lifespan+AttainedAge	1	29363985	rs2486200	0.000757	698000	0.02954	-0.00681	0.003129	0.0024	-0.00829147	0.00272351	0.7691	A
FatherMetal_Lifespan+AttainedAge	1	29445514	rs553253	0.001561	698000	0.05511	-0.005316	0.002772	0.003	-0.00702176	0.00238361	0.6646	A
FatherMetal_Lifespan+AttainedAge	1	29445598	rs9578	0.0003795	698000	0.02764	0.006125	0.002781	0.001	0.00779914	0.00236917	0.6684	A
FatherMetal_Lifespan+AttainedAge	1	29569212	rs7349137	0.001266	698000	0.0476	-0.006275	0.003168	0.0027	-0.0083458	0.00278763	0.6825	A
FatherMetal_Lifespan+AttainedAge	1	31099501	rs11589302	0.0008149	691000	0.01861	0.006352	0.002699	0.0045	0.00658497	0.00228958	0.97	G
FatherMetal_Lifespan+AttainedAge	1	31118741	rs522294	0.0004895	698000	0.03383	0.005915	0.002787	0.0011	0.00798671	0.00237624	0.6398	A
FatherMetal_Lifespan+AttainedAge	1	31133242	rs1188432	0.0008529	696000	0.01685	0.006733	0.002817	0.0053	0.00691724	0.0024064	0.9953	G
FatherMetal_Lifespan+AttainedAge	1	31413972	rs3795433	0.001473	698000	0.005755	-0.01436	0.0052	0.027	-0.00983641	0.00455376	0.5478	A
FatherMetal_Lifespan+AttainedAge	1	31898132	rs4949400	0.001359	698000	0.01225	-0.006435	0.002569	0.013	-0.00538854	0.0021993	0.7945	G
FatherMetal_Lifespan+AttainedAge	1	33355923	rs1284373	0.001387	696000	0.00995	0.008047	0.003122	0.016	0.00649871	0.00271904	0.7171	G
FatherMetal_Lifespan+AttainedAge	1	37256063	rs479779	0.001472	698000	0.06313	0.004914	0.002644	0.0023	0.00690997	0.00227443	0.6014	A
FatherMetal_Lifespan+AttainedAge	1	39425489	rs4475740	0.002373	698000	0.09743	-0.007605	0.004588	0.0025	-0.0124288	0.00405812	0.5172	G
FatherMetal_Lifespan+AttainedAge	1	46645524	rs3820082	0.002328	697000	0.01556	0.008865	0.003664	0.02	0.0072444	0.00312732	0.7659	C
FatherMetal_Lifespan+AttainedAge	1	46649046	rs10890384	0.002243	698000	0.007831	0.009616	0.003616	0.034	0.00662667	0.00313547	0.5592	G
FatherMetal_Lifespan+AttainedAge	1	46881353	rs324425	0.0002402	698000	0.01538	0.01346	0.005554	0.0011	0.0147282	0.00460194	0.7952	G
FatherMetal_Lifespan+AttainedAge	1	53752134	rs12035926	0.002049	698000	0.09455	-0.004365	0.002611	0.0021	-0.00697913	0.00224739	0.5038	A
FatherMetal_Lifespan+AttainedAge	1	55134487	rs478513	0.001279	696000	0.0001247	0.01086	0.002832	0.2	0.00322478	0.00241688	0.05679	G
FatherMetal_Lifespan+AttainedAge	1	55136529	rs480963	0.002441	698000	3.98e-05	0.01149	0.002797	0.46	0.00184578	0.00238686	0.01598	A
FatherMetal_Lifespan+AttainedAge	1	55494682	rs2495499	0.001739	698000	0.1289	-0.003877	0.002553	0.001	-0.00700952	0.00217676	0.3669	G
FatherMetal_Lifespan+AttainedAge	1	55538552	rs10493176	0.001456	698000	0.031	0.01008	0.004673	0.0055	0.011208	0.0041266	0.8789	A
FatherMetal_Lifespan+AttainedAge	1	56751380	rs2211292	0.0006734	697000	0.02418	0.005838	0.00259	0.0026	0.0065945	0.00222023	0.8228	G
FatherMetal_Lifespan+AttainedAge	1	56860086	rs12408513	0.0001607	698000	0.003002	-0.008721	0.002939	0.0036	-0.00733572	0.00254534	0.7432	G
FatherMetal_Lifespan+AttainedAge	1	56872794	rs17469007	0.0002564	698000	0.001504	-0.008928	0.002813	0.011	-0.00607252	0.0024336	0.4907	C
FatherMetal_Lifespan+AttainedAge	1	56877509	rs11206803	7.182e-06	698000	2.504e-05	-0.01072	0.002543	0.0047	-0.00598401	0.00219283	0.2145	G
FatherMetal_Lifespan+AttainedAge	1	56932035	rs11206816	5.333e-05	698000	0.01362	-0.007146	0.002896	0.00016	-0.0092668	0.00248569	0.5946	A
FatherMetal_Lifespan+AttainedAge	1	56941387	rs4912291	4.842e-05	698000	0.01623	-0.0064	0.002663	0.00011	-0.00875462	0.0022749	0.5288	G
FatherMetal_Lifespan+AttainedAge	1	56955386	rs4638151	2.384e-05	698000	0.01253	-0.006851	0.002744	5.7e-05	-0.00938479	0.00234547	0.5095	A
FatherMetal_Lifespan+AttainedAge	1	56968755	rs7528118	5.342e-05	698000	0.001212	-0.0096	0.002967	0.0022	-0.00776448	0.00255594	0.6714	G
FatherMetal_Lifespan+AttainedAge	1	57013198	rs1041602	6.337e-05	698000	0.006121	-0.01046	0.003815	0.00054	-0.0113933	0.00331244	0.8765	G
FatherMetal_Lifespan+AttainedAge	1	57036017	rs2065553	0.0005047	698000	0.02168	-0.01084	0.004721	0.002	-0.0124505	0.00408627	0.8066	G
FatherMetal_Lifespan+AttainedAge	1	66217735	rs12086495	0.001866	691000	0.002377	-0.009892	0.003256	0.063	-0.005385	0.00277618	0.3079	G
FatherMetal_Lifespan+AttainedAge	1	66341764	rs12760605	0.0006515	697000	4.017e-05	0.01296	0.003156	0.19	0.00351041	0.00269038	0.03842	G
FatherMetal_Lifespan+AttainedAge	1	66352755	rs4655804	0.002426	697000	0.03452	-0.006702	0.00317	0.0096	-0.0071034	0.00270777	0.9436	A
FatherMetal_Lifespan+AttainedAge	1	66387487	rs17451403	0.000244	697000	8.146e-06	0.01324	0.002969	0.17	0.00345747	0.00255609	0.02253	G
FatherMetal_Lifespan+AttainedAge	1	66402424	rs12058296	0.001314	697000	0.004877	0.007548	0.002681	0.027	0.00505123	0.00230168	0.5223	C
FatherMetal_Lifespan+AttainedAge	1	66416939	rs1937455	0.002028	698000	0.034	0.005427	0.00256	0.0077	0.0057327	0.00219298	0.9094	A
FatherMetal_Lifespan+AttainedAge	1	66426100	rs10789205	0.002494	698000	0.006919	0.007122	0.002637	0.042	0.00457051	0.00226158	0.507	G
FatherMetal_Lifespan+AttainedAge	1	66446787	rs1937457	0.0005921	696000	0.0001669	0.01062	0.002822	0.095	0.00399251	0.00240107	0.1042	G
FatherMetal_Lifespan+AttainedAge	1	68847248	rs9436816	0.002479	698000	0.03873	-0.008343	0.004036	0.0087	-0.00886012	0.00342324	0.9011	A
FatherMetal_Lifespan+AttainedAge	1	77939418	rs2647503	0.002023	698000	0.2733	-0.002799	0.002555	0.0003	-0.00778675	0.00217316	0.1652	G
FatherMetal_Lifespan+AttainedAge	1	77986516	rs10873947	0.00123	698000	0.05214	0.00505	0.0026	0.0023	0.00668515	0.00222412	0.6422	G
FatherMetal_Lifespan+AttainedAge	1	79653433	rs10489655	0.001349	698000	0.0006654	-0.0176	0.005172	0.098	-0.00748721	0.00452582	0.1685	C
FatherMetal_Lifespan+AttainedAge	1	80821220	rs11162975	0.0006735	698000	0.005774	-0.00739	0.002677	0.011	-0.00572012	0.00227035	0.6864	A
FatherMetal_Lifespan+AttainedAge	1	80825083	rs10158964	0.002235	698000	0.05159	-0.005421	0.002785	0.0054	-0.00647891	0.00235459	0.7621	C
FatherMetal_Lifespan+AttainedAge	1	82605135	rs11163433	0.002031	698000	0.1855	-0.00348	0.002628	0.00067	-0.00776405	0.00225849	0.2704	A
FatherMetal_Lifespan+AttainedAge	1	82689732	rs10493711	0.0004367	698000	0.1132	-0.004189	0.002645	0.00014	-0.00869553	0.00227939	0.2441	G
FatherMetal_Lifespan+AttainedAge	1	82690006	rs10493712	0.00183	698000	0.03455	0.005381	0.002546	0.0066	0.00591448	0.00218376	0.8821	G
FatherMetal_Lifespan+AttainedAge	1	82723394	rs785605	0.0003713	698000	0.0489	-0.005175	0.002628	0.00044	-0.00792119	0.00225687	0.4699	A
FatherMetal_Lifespan+AttainedAge	1	91028707	rs7546770	0.000704	650000	0.00078	-0.009306	0.00277	0.041	-0.00441823	0.00217915	0.2083	G
FatherMetal_Lifespan+AttainedAge	1	91075849	rs6667438	0.002095	698000	0.006349	-0.007549	0.002766	0.037	-0.00497427	0.00237113	0.514	G
FatherMetal_Lifespan+AttainedAge	1	106860057	rs1888181	0.0007797	698000	0.0001687	0.009619	0.002557	0.12	0.0033932	0.00218687	0.09198	A
FatherMetal_Lifespan+AttainedAge	1	109807099	rs6689614	0.0009785	698000	0.2846	-0.002727	0.002549	7.7e-05	-0.00854154	0.00218224	0.1082	G
FatherMetal_Lifespan+AttainedAge	1	109814880	rs4970834	6.695e-08	698000	0.009193	0.008512	0.003268	1.3e-08	0.0157337	0.00279827	0.1157	G
FatherMetal_Lifespan+AttainedAge	1	109822166	rs599839	4.433e-09	696000	0.00166	0.009544	0.003035	4e-09	0.0150856	0.00258651	0.1913	A
FatherMetal_Lifespan+AttainedAge	1	109834938	rs17645031	6.085e-05	698000	0.08727	0.007797	0.00456	9.4e-06	0.0169471	0.00387225	0.1478	G
FatherMetal_Lifespan+AttainedAge	1	109955569	rs17586966	2.662e-05	698000	0.01421	0.01321	0.005389	5.6e-05	0.0188294	0.00469262	0.4885	A
FatherMetal_Lifespan+AttainedAge	1	110283785	rs4970777	0.0009572	698000	0.000393	-0.0091	0.002567	0.095	-0.00365356	0.00220108	0.1428	A
FatherMetal_Lifespan+AttainedAge	1	110295772	rs1887547	0.000448	698000	0.005012	-0.007291	0.002598	0.0077	-0.00587432	0.00222309	0.7172	G
FatherMetal_Lifespan+AttainedAge	1	113161350	rs11102516	4.417e-05	698000	0.002001	-0.02009	0.0065	0.0011	-0.0188452	0.0057419	0.8393	G
FatherMetal_Lifespan+AttainedAge	1	151804213	rs17582155	0.0003752	693000	0.07372	0.03944	0.02205	0.00024	0.0694328	0.0188179	0.354	G
FatherMetal_Lifespan+AttainedAge	1	154400015	rs4845618	0.0006024	698000	0.08997	-0.004348	0.002564	0.00035	-0.0078457	0.0022074	0.3428	A
FatherMetal_Lifespan+AttainedAge	1	154407419	rs7518199	0.0008778	698000	0.004311	0.007376	0.002584	0.019	0.00518722	0.00220695	0.5586	A
FatherMetal_Lifespan+AttainedAge	1	154422067	rs4845625	0.0002305	698000	0.0212	-0.005926	0.002571	0.0007	-0.00741843	0.00219874	0.677	G
FatherMetal_Lifespan+AttainedAge	1	154436195	rs4240872	0.0013	698000	0.03574	-0.00629	0.002995	0.004	-0.00742794	0.00260092	0.8009	A
FatherMetal_Lifespan+AttainedAge	1	154925989	rs1218593	0.0002797	698000	1.263e-05	0.03711	0.008499	0.16	0.0108162	0.00772475	0.02828	A
FatherMetal_Lifespan+AttainedAge	1	156796844	rs6427332	0.0002954	698000	0.000146	0.01153	0.003037	0.056	0.00500294	0.00261021	0.1338	G
FatherMetal_Lifespan+AttainedAge	1	159871738	rs2494485	0.0006391	698000	0.008482	0.02903	0.01103	0.0073	0.0270501	0.0100821	0.8166	G
FatherMetal_Lifespan+AttainedAge	1	167156816	rs9287078	0.002134	698000	0.01386	-0.007297	0.002965	0.02	-0.00577909	0.00251969	0.7454	C
FatherMetal_Lifespan+AttainedAge	1	167158183	rs6658631	0.001858	697000	0.04613	-0.005178	0.002597	0.0048	-0.00615427	0.00221387	0.7713	A
FatherMetal_Lifespan+AttainedAge	1	169090660	rs12731646	0.001684	698000	0.004602	0.007342	0.002591	0.037	0.0045838	0.00221757	0.4685	G
FatherMetal_Lifespan+AttainedAge	1	169091466	rs3753292	0.000866	698000	0.004859	-0.007185	0.002551	0.017	-0.00521422	0.00218747	0.5932	G
FatherMetal_Lifespan+AttainedAge	1	169093676	rs7540067	0.0004589	699000	0.007903	-0.006751	0.002542	0.0052	-0.00611132	0.00217845	0.8567	A
FatherMetal_Lifespan+AttainedAge	1	169112504	rs12724494	0.0009443	698000	0.00287	0.007582	0.002543	0.028	0.00480347	0.00218091	0.4468	G
FatherMetal_Lifespan+AttainedAge	1	169176590	rs1080266	0.0007754	698000	0.005757	0.007018	0.002542	0.013	0.00552264	0.00217317	0.6603	A
FatherMetal_Lifespan+AttainedAge	1	169255020	rs12733626	0.001787	698000	0.001474	0.008449	0.002657	0.082	0.00399335	0.00224626	0.2414	C
FatherMetal_Lifespan+AttainedAge	1	169293721	rs7538259	0.0008439	698000	0.005928	0.007056	0.002564	0.014	0.0054961	0.00218128	0.6544	G
FatherMetal_Lifespan+AttainedAge	1	178657678	rs2811250	0.002395	697000	0.02751	0.007412	0.003363	0.012	0.00728459	0.00292061	0.9696	G
FatherMetal_Lifespan+AttainedAge	1	178813531	rs3766642	0.00199	698000	0.01337	0.01035	0.004186	0.019	0.00840979	0.00360584	0.7476	G
FatherMetal_Lifespan+AttainedAge	1	178826282	rs10913634	0.001769	698000	0.1173	0.00403	0.002573	0.0012	0.00711854	0.00219877	0.4018	A
FatherMetal_Lifespan+AttainedAge	1	179748514	rs4448484	1.266e-05	698000	0.006039	0.007229	0.002633	6.2e-05	0.00913045	0.00228374	0.6337	G
FatherMetal_Lifespan+AttainedAge	1	179750647	rs10913887	5.102e-05	698000	0.01516	0.006169	0.00254	0.00013	0.00830816	0.00217505	0.5552	G
FatherMetal_Lifespan+AttainedAge	1	180096149	rs9425483	0.002136	698000	0.05776	0.005726	0.003018	0.0044	0.00742008	0.00258543	0.7062	G
FatherMetal_Lifespan+AttainedAge	1	183281919	rs2050701	0.000797	698000	0.01773	0.00652	0.00275	0.0046	0.00663215	0.00236402	0.9681	A
FatherMetal_Lifespan+AttainedAge	1	183317819	rs3924298	0.0007229	698000	0.2043	0.003263	0.002571	9.8e-05	0.00849774	0.00220575	0.1514	C
FatherMetal_Lifespan+AttainedAge	1	183384796	rs2788045	0.0005957	695000	0.007608	0.007303	0.002736	0.0074	0.00623188	0.00234417	0.7894	A
FatherMetal_Lifespan+AttainedAge	1	183496658	rs2877978	0.002268	697000	0.008244	0.007151	0.002707	0.033	0.00488509	0.00231557	0.5697	A
FatherMetal_Lifespan+AttainedAge	1	183509238	rs789172	0.0008489	698000	0.01313	-0.006314	0.002546	0.0068	-0.00583825	0.00217447	0.9116	A
FatherMetal_Lifespan+AttainedAge	1	184408478	rs6695258	0.0009611	698000	0.1605	-0.01054	0.007513	0.00026	-0.0229445	0.00624624	0.2316	A
FatherMetal_Lifespan+AttainedAge	1	184728874	rs3895196	0.0005957	698000	0.001438	0.008151	0.002557	0.028	0.00473234	0.00221326	0.3662	C
FatherMetal_Lifespan+AttainedAge	1	184757199	rs861620	0.001143	698000	0.0002402	-0.00964	0.002625	0.14	-0.00336547	0.00223644	0.09514	G
FatherMetal_Lifespan+AttainedAge	1	184761365	rs682331	0.001071	698000	0.001519	-0.008105	0.002556	0.049	-0.00428314	0.00217846	0.3037	A
FatherMetal_Lifespan+AttainedAge	1	184777079	rs338564	0.0006895	698000	0.0002277	-0.01185	0.003216	0.094	-0.0045878	0.0027304	0.1188	G
FatherMetal_Lifespan+AttainedAge	1	197995961	rs7551861	0.0018	698000	0.05056	-0.004998	0.002556	0.0041	-0.00626731	0.00218588	0.7278	A
FatherMetal_Lifespan+AttainedAge	1	198894457	rs1275164	0.002378	645000	0.00117	-0.01051	0.003237	0.1	-0.00427081	0.00251154	0.1563	A
FatherMetal_Lifespan+AttainedAge	1	200285880	rs2790125	0.001772	698000	0.1385	-0.004001	0.002701	0.00091	-0.0076109	0.00232153	0.3452	G
FatherMetal_Lifespan+AttainedAge	1	200481934	rs4418638	0.0009299	698000	0.01266	-0.008384	0.003363	0.0079	-0.00751653	0.0028504	0.8808	A
FatherMetal_Lifespan+AttainedAge	1	200901416	rs425079	0.0005167	698000	0.004838	0.016	0.005678	0.0094	0.0132232	0.0050843	0.682	C
FatherMetal_Lifespan+AttainedAge	1	200904137	rs296514	0.001941	698000	0.03561	0.02166	0.01031	0.0069	0.0263088	0.00972806	0.8829	A
FatherMetal_Lifespan+AttainedAge	1	201790826	rs1032524	0.000653	698000	0.08466	0.004407	0.002556	0.00044	0.00755566	0.00218605	0.3729	G
FatherMetal_Lifespan+AttainedAge	1	201800868	rs2820295	0.0002775	698000	0.01076	-0.006893	0.002703	0.002	-0.00699811	0.0022952	0.9458	G
FatherMetal_Lifespan+AttainedAge	1	201886402	rs2047264	0.0002971	698000	0.03569	0.005356	0.00255	0.0005	0.00747533	0.00218278	0.5409	A
FatherMetal_Lifespan+AttainedAge	1	202066564	rs4576706	0.001659	698000	0.1105	0.005067	0.003175	0.0012	0.008728	0.00272171	0.4145	G
FatherMetal_Lifespan+AttainedAge	1	202117002	rs2070257	0.001987	650000	0.07858	0.006309	0.003587	0.0029	0.00856301	0.00280999	0.6738	G
FatherMetal_Lifespan+AttainedAge	1	205045087	rs1572993	0.001233	698000	0.005487	-0.007142	0.002572	0.023	-0.0049405	0.00220387	0.566	G
FatherMetal_Lifespan+AttainedAge	1	205305684	rs13375059	0.0003489	698000	0.001882	-0.02115	0.006803	0.013	-0.0155416	0.00625814	0.4974	A
FatherMetal_Lifespan+AttainedAge	1	208216304	rs2274448	0.002098	699000	0.009525	-0.01853	0.007146	0.027	-0.0140834	0.00649374	0.6292	C
FatherMetal_Lifespan+AttainedAge	1	208415871	rs7533778	0.00246	698000	0.003008	-0.01467	0.004945	0.073	-0.00766289	0.00436476	0.3216	G
FatherMetal_Lifespan+AttainedAge	1	209482201	rs2660635	0.0009996	698000	0.1377	0.004283	0.002885	0.00037	0.00875596	0.00246321	0.2776	G
FatherMetal_Lifespan+AttainedAge	1	210463122	rs689248	0.0002405	695000	5.702e-05	-0.01426	0.003543	0.074	-0.00527809	0.00294404	0.08188	G
FatherMetal_Lifespan+AttainedAge	1	210486895	rs4844997	0.0009227	698000	7.859e-05	-0.01424	0.003607	0.19	-0.00394958	0.00300275	0.05016	A
FatherMetal_Lifespan+AttainedAge	1	210519658	rs1338289	0.0004868	698000	0.0001109	-0.01419	0.00367	0.099	-0.00503015	0.00306274	0.08931	G
FatherMetal_Lifespan+AttainedAge	1	210622790	rs3819985	0.002303	698000	0.000834	-0.01203	0.003601	0.14	-0.00446847	0.00302132	0.1501	G
FatherMetal_Lifespan+AttainedAge	1	214609822	rs4253890	0.002051	697000	0.000195	0.01076	0.002888	0.24	0.00292273	0.00247774	0.05907	A
FatherMetal_Lifespan+AttainedAge	1	219865236	rs12096993	0.00145	697000	0.004478	-0.00831	0.002923	0.032	-0.00549188	0.00250753	0.4838	G
FatherMetal_Lifespan+AttainedAge	1	221934718	rs11581623	0.001466	698000	0.004987	0.008453	0.00301	0.03	0.00565103	0.00255963	0.5112	G
FatherMetal_Lifespan+AttainedAge	1	223701097	rs12061221	0.00116	698000	0.0001064	0.01042	0.002689	0.2	0.00286286	0.00229719	0.05422	C
FatherMetal_Lifespan+AttainedAge	1	226772889	rs12035052	0.001019	698000	0.00395	-0.009027	0.003132	0.024	-0.00601281	0.00266471	0.5113	G
FatherMetal_Lifespan+AttainedAge	1	228326492	rs11809443	0.002403	697000	0.3618	-0.002824	0.003096	0.00021	-0.00988246	0.00264346	0.117	A
FatherMetal_Lifespan+AttainedAge	1	228334277	rs10916268	0.002225	690000	0.8739	0.0004149	0.002615	1e-05	0.00972866	0.00221216	0.01262	A
FatherMetal_Lifespan+AttainedAge	1	230463537	rs10864742	0.001943	698000	0.01154	-0.008992	0.00356	0.021	-0.00707553	0.00312397	0.703	G
FatherMetal_Lifespan+AttainedAge	1	234729643	rs7532095	0.001164	698000	0.03214	0.006602	0.003081	0.0039	0.00766095	0.00263874	0.8184	G
FatherMetal_Lifespan+AttainedAge	1	236893599	rs819639	0.001585	698000	0.4203	0.002219	0.002753	6.6e-05	0.00946696	0.00236557	0.0703	G
FatherMetal_Lifespan+AttainedAge	1	236897376	rs707204	0.002203	698000	0.3334	0.003013	0.003115	0.00022	0.00990024	0.00267005	0.1279	A
FatherMetal_Lifespan+AttainedAge	1	236898163	rs6428968	0.000504	698000	0.08198	0.005607	0.003224	0.00031	0.00999212	0.00275875	0.3486	A
FatherMetal_Lifespan+AttainedAge	1	236910863	rs10802557	0.002025	698000	0.5226	0.001814	0.002837	5.4e-05	0.00993626	0.00246471	0.05058	A
FatherMetal_Lifespan+AttainedAge	1	241027742	rs410331	0.001581	698000	0.005328	0.008128	0.002917	0.031	0.00561875	0.00254606	0.5157	C
FatherMetal_Lifespan+AttainedAge	1	241039187	rs4660010	0.001374	698000	0.00172	0.008301	0.002648	0.058	0.00441338	0.00230486	0.2948	A
FatherMetal_Lifespan+AttainedAge	1	241049361	rs2995381	0.00121	698000	0.001623	0.009357	0.002969	0.053	0.00505124	0.00255609	0.3	G
FatherMetal_Lifespan+AttainedAge	1	241068852	rs390488	0.0009361	698000	0.0004394	-0.009246	0.00263	0.088	-0.0038372	0.00223248	0.1548	G
FatherMetal_Lifespan+AttainedAge	1	241078810	rs191735	0.001121	698000	0.001	-0.008558	0.002601	0.066	-0.00406795	0.00221401	0.2344	C
FatherMetal_Lifespan+AttainedAge	1	242606388	rs2810034	0.002294	698000	0.08108	-0.004628	0.002653	0.0031	-0.00680337	0.00227429	0.5842	A
FatherMetal_Lifespan+AttainedAge	1	246234124	rs12075850	0.0003669	698000	0.01032	0.01286	0.005015	0.003	0.0125999	0.00423512	0.9875	A
FatherMetal_Lifespan+AttainedAge	1	246280508	rs7553693	0.0009491	697000	0.01603	0.01149	0.004773	0.0064	0.0111664	0.00409104	0.9587	G
FatherMetal_Lifespan+AttainedAge	1	246282263	rs12404212	0.0008583	698000	0.01507	0.01102	0.004532	0.006	0.0107701	0.00389115	0.9585	G
FatherMetal_Lifespan+AttainedAge	2	106692	rs6755432	0.002064	698000	0.004739	0.007388	0.002616	0.045	0.00443573	0.0022289	0.4428	A
FatherMetal_Lifespan+AttainedAge	2	601905	rs2867105	0.001806	698000	0.0008799	0.01095	0.003292	0.11	0.00447647	0.00285284	0.1751	C
FatherMetal_Lifespan+AttainedAge	2	709119	rs4854272	0.001628	699000	0.0205	-0.007699	0.003323	0.0099	-0.00699287	0.00280032	0.9415	A
FatherMetal_Lifespan+AttainedAge	2	10993273	rs11692302	0.0009332	698000	0.03614	-0.005381	0.002568	0.0025	-0.00673252	0.00221053	0.7324	A
FatherMetal_Lifespan+AttainedAge	2	11001859	rs16856756	0.0007579	698000	0.09843	-0.004986	0.003017	0.00043	-0.00930611	0.00259096	0.3438	A
FatherMetal_Lifespan+AttainedAge	2	11004489	rs1318011	0.001549	698000	0.04639	-0.005509	0.002766	0.0037	-0.00697585	0.00238348	0.7308	G
FatherMetal_Lifespan+AttainedAge	2	12896713	rs12616457	0.000772	698000	0.01464	-0.006501	0.002663	0.0054	-0.00648643	0.00230028	0.9686	G
FatherMetal_Lifespan+AttainedAge	2	12962818	rs17465721	0.002173	698000	0.01941	-0.006277	0.002685	0.015	-0.00560079	0.00230035	0.8611	G
FatherMetal_Lifespan+AttainedAge	2	12964428	rs10186351	0.0006951	698000	0.0003334	0.009161	0.002553	0.078	0.00392715	0.00217709	0.1499	A
FatherMetal_Lifespan+AttainedAge	2	12974244	rs4669886	4.858e-05	650000	0.001754	-0.008763	0.002801	0.0013	-0.00713651	0.00221103	0.6679	A
FatherMetal_Lifespan+AttainedAge	2	12996275	rs1521244	2.385e-05	698000	0.01026	-0.006907	0.00269	7.5e-05	-0.00918662	0.00231347	0.5668	A
FatherMetal_Lifespan+AttainedAge	2	13002998	rs1357060	0.001139	698000	0.02238	0.005813	0.002545	0.0057	0.00607356	0.00217835	0.9531	G
FatherMetal_Lifespan+AttainedAge	2	13024831	rs1879543	0.001214	698000	0.02496	0.005706	0.002545	0.0055	0.00609373	0.00217432	0.924	A
FatherMetal_Lifespan+AttainedAge	2	13028547	rs6739633	8.247e-06	698000	0.006642	-0.007047	0.002596	3e-05	-0.00931878	0.00223165	0.5495	G
FatherMetal_Lifespan+AttainedAge	2	13052225	rs779357	2.655e-05	698000	0.02207	-0.005871	0.002565	2.9e-05	-0.00928465	0.00220193	0.3696	G
FatherMetal_Lifespan+AttainedAge	2	14345464	rs1075729	4.767e-05	698000	0.0009421	0.008403	0.002541	0.0024	0.00666387	0.002183	0.6251	A
FatherMetal_Lifespan+AttainedAge	2	14366696	rs12692521	5.516e-05	698000	0.001921	-0.0079	0.002546	0.0015	-0.00690852	0.00217825	0.7908	A
FatherMetal_Lifespan+AttainedAge	2	14366849	rs1839211	5.144e-05	698000	9.525e-05	0.01001	0.002564	0.014	0.00541086	0.00219269	0.2132	A
FatherMetal_Lifespan+AttainedAge	2	14433542	rs11684967	0.0007815	694000	0.0006174	0.008954	0.002615	0.061	0.00420608	0.00222845	0.2029	G
FatherMetal_Lifespan+AttainedAge	2	14568877	rs6752334	0.002411	698000	0.02774	-0.005635	0.00256	0.012	-0.00551939	0.00219607	0.9738	G
FatherMetal_Lifespan+AttainedAge	2	16648888	rs4832633	0.002125	698000	0.1085	0.004584	0.002856	0.0018	0.0076553	0.0024361	0.4582	A
FatherMetal_Lifespan+AttainedAge	2	17940797	rs9306857	0.0006472	698000	0.0002806	-0.06781	0.01867	0.08	-0.0307079	0.0171611	0.1393	G
FatherMetal_Lifespan+AttainedAge	2	17991354	rs13393469	0.0007025	698000	0.000207	-0.06306	0.017	0.1	-0.0272616	0.0164305	0.1107	G
FatherMetal_Lifespan+AttainedAge	2	18539232	rs12619043	0.002453	698000	0.002191	-0.007827	0.002555	0.088	-0.00373065	0.00217894	0.2665	A
FatherMetal_Lifespan+AttainedAge	2	18704988	rs13403095	0.001856	698000	0.001444	0.01049	0.003294	0.086	0.00485166	0.00284537	0.2345	A
FatherMetal_Lifespan+AttainedAge	2	19541577	rs2084045	0.0005288	698000	0.03674	0.01653	0.007913	0.0011	0.0218407	0.00655986	0.6232	C
FatherMetal_Lifespan+AttainedAge	2	19984546	rs9679438	0.0002156	698000	0.00833	0.01579	0.005986	0.0019	0.0169385	0.00549884	0.9875	G
FatherMetal_Lifespan+AttainedAge	2	19987440	rs1204005	0.001863	698000	0.01481	0.01496	0.00614	0.016	0.0133476	0.00559384	0.7966	A
FatherMetal_Lifespan+AttainedAge	2	20270027	rs2126551	0.002161	698000	0.04425	-0.005163	0.002566	0.0062	-0.00611323	0.00220854	0.8167	A
FatherMetal_Lifespan+AttainedAge	2	23155213	rs10206536	0.001697	698000	0.00673	-0.007406	0.002733	0.028	-0.0052619	0.00234776	0.5661	A
FatherMetal_Lifespan+AttainedAge	2	25305504	rs551573	0.0009283	698000	0.000231	0.009499	0.00258	0.12	0.00338741	0.00222042	0.1033	G
FatherMetal_Lifespan+AttainedAge	2	25342914	rs7575363	0.002089	697000	0.009892	-0.007214	0.002797	0.026	-0.00528025	0.00237366	0.6398	A
FatherMetal_Lifespan+AttainedAge	2	25658808	rs2384234	0.002035	698000	0.07143	0.005423	0.003008	0.0031	0.00764275	0.00259092	0.6116	G
FatherMetal_Lifespan+AttainedAge	2	25683447	rs6546199	0.001145	698000	0.004208	0.007983	0.002789	0.026	0.00528209	0.00238735	0.5085	G
FatherMetal_Lifespan+AttainedAge	2	25705428	rs6751254	0.001098	698000	0.0004505	0.008917	0.002542	0.1	0.00348746	0.00217314	0.1458	G
FatherMetal_Lifespan+AttainedAge	2	26156655	rs2384298	0.0007184	694000	0.01146	0.007358	0.00291	0.0063	0.00701393	0.00256168	0.8876	A
FatherMetal_Lifespan+AttainedAge	2	26678496	rs11126491	7.813e-05	694000	0.02372	0.00615	0.002719	0.00013	0.0101545	0.00265303	0.4885	C
FatherMetal_Lifespan+AttainedAge	2	27058451	rs4513249	0.001006	698000	0.001572	0.008157	0.00258	0.045	0.00438396	0.0022076	0.3165	C
FatherMetal_Lifespan+AttainedAge	2	28371475	rs6707039	0.0022	698000	0.002119	-0.01557	0.005067	0.081	-0.00716484	0.00428969	0.2743	A
FatherMetal_Lifespan+AttainedAge	2	28592116	rs11902329	0.001013	698000	0.02512	-0.006602	0.002948	0.0043	-0.00691271	0.00250077	0.8858	G
FatherMetal_Lifespan+AttainedAge	2	29434339	rs12997875	1.547e-05	698000	0.0008821	0.008483	0.002551	0.00067	0.00749715	0.00218537	0.7751	A
FatherMetal_Lifespan+AttainedAge	2	29435447	rs1615183	6.405e-05	698000	0.01398	-0.00627	0.002551	0.0002	-0.00808716	0.00217931	0.6131	G
FatherMetal_Lifespan+AttainedAge	2	29435897	rs1728827	0.001471	694000	0.1914	0.003384	0.00259	0.00038	0.00782012	0.00220927	0.2326	A
FatherMetal_Lifespan+AttainedAge	2	29446202	rs4622670	0.0007221	698000	0.03123	0.005735	0.002662	0.0021	0.00710082	0.00228975	0.7389	G
FatherMetal_Lifespan+AttainedAge	2	29447108	rs4387740	0.0003057	698000	0.01328	-0.006862	0.002771	0.0018	-0.00747598	0.00238558	0.8915	A
FatherMetal_Lifespan+AttainedAge	2	43247753	rs7560194	0.001929	698000	0.1418	0.003894	0.00265	0.001	0.00752681	0.00227636	0.3491	G
FatherMetal_Lifespan+AttainedAge	2	43509617	rs7599564	0.001132	698000	0.4642	-0.001905	0.002603	2.6e-05	-0.00942387	0.00223269	0.04643	G
FatherMetal_Lifespan+AttainedAge	2	43634135	rs9677398	0.001396	698000	0.01268	0.007092	0.002845	0.013	0.00608519	0.00241556	0.7997	C
FatherMetal_Lifespan+AttainedAge	2	43635143	rs6544656	0.0006858	698000	0.01001	0.007499	0.002912	0.0068	0.00681331	0.00248268	0.8591	G
FatherMetal_Lifespan+AttainedAge	2	43695148	rs6741434	5.357e-05	698000	0.002952	0.008654	0.002911	0.00095	0.00824043	0.00248029	0.9225	G
FatherMetal_Lifespan+AttainedAge	2	43752382	rs6708660	0.001591	698000	0.0093	0.006746	0.002594	0.02	0.0051855	0.00222296	0.6741	A
FatherMetal_Lifespan+AttainedAge	2	43855643	rs6740739	0.0001761	698000	0.02925	0.005976	0.002741	0.00031	0.00834412	0.00232731	0.5277	G
FatherMetal_Lifespan+AttainedAge	2	44099582	rs4148218	0.002297	698000	0.008423	0.008608	0.003267	0.033	0.00603233	0.00281131	0.5757	G
FatherMetal_Lifespan+AttainedAge	2	44328998	rs17425397	0.0008451	697000	0.009409	0.01352	0.005207	0.0093	0.011437	0.00434827	0.7952	A
FatherMetal_Lifespan+AttainedAge	2	45105675	rs737448	0.0008263	697000	0.05214	0.01082	0.00557	0.0013	0.0153067	0.00479054	0.5742	C
FatherMetal_Lifespan+AttainedAge	2	46738231	rs11125081	0.00166	698000	0.1519	0.01157	0.008073	0.0007	0.0253233	0.00737374	0.3084	A
FatherMetal_Lifespan+AttainedAge	2	50085965	rs1363047	0.0009332	698000	0.01037	0.008276	0.003229	0.0096	0.0072821	0.00277449	0.8116	A
FatherMetal_Lifespan+AttainedAge	2	51367130	rs10182663	0.001599	698000	0.009366	-0.009181	0.003533	0.02	-0.00683763	0.00296211	0.6753	G
FatherMetal_Lifespan+AttainedAge	2	57069147	rs6545600	0.001988	698000	0.06509	0.004731	0.002565	0.0034	0.00642828	0.0021908	0.6444	A
FatherMetal_Lifespan+AttainedAge	2	57077745	rs6741957	0.0007185	698000	0.08658	0.004578	0.002671	0.00049	0.00800219	0.00228299	0.377	G
FatherMetal_Lifespan+AttainedAge	2	60012802	rs1019264	0.002334	698000	0.8714	0.0004236	0.002617	2.4e-06	-0.010674	0.00227073	0.00357	G
FatherMetal_Lifespan+AttainedAge	2	60024272	rs6735549	3.49e-05	698000	0.1072	-0.00719	0.004463	2.4e-06	-0.0186455	0.00394172	0.09188	G
FatherMetal_Lifespan+AttainedAge	2	60040489	rs7572396	0.002252	698000	0.1762	-0.006303	0.004659	0.00087	-0.0134741	0.0040467	0.2981	G
FatherMetal_Lifespan+AttainedAge	2	60131753	rs11888341	0.001983	698000	0.1189	0.004092	0.002624	0.0014	0.00705066	0.00223908	0.4137	A
FatherMetal_Lifespan+AttainedAge	2	60155693	rs17050497	0.001218	698000	0.08643	0.004634	0.002703	0.0011	0.00738649	0.00229996	0.4531	A
FatherMetal_Lifespan+AttainedAge	2	60160790	rs12713413	0.001768	698000	0.04593	0.005164	0.002587	0.0045	0.00617313	0.00221565	0.761	G
FatherMetal_Lifespan+AttainedAge	2	60713235	rs10189857	0.0003878	698000	0.06821	-0.00467	0.002561	0.00028	-0.00793261	0.00219694	0.371	A
FatherMetal_Lifespan+AttainedAge	2	61406438	rs17006750	6.079e-05	698000	0.00467	-0.01013	0.00358	0.00069	-0.010233	0.00306996	0.9557	A
FatherMetal_Lifespan+AttainedAge	2	62756049	rs6726083	0.002295	698000	0.01372	0.009949	0.004037	0.022	0.0077736	0.00346138	0.727	A
FatherMetal_Lifespan+AttainedAge	2	62793940	rs6709361	0.001741	698000	0.006987	0.008258	0.003061	0.028	0.00578069	0.00265312	0.5727	A
FatherMetal_Lifespan+AttainedAge	2	62946658	rs1906198	0.001554	698000	0.04463	0.005456	0.002717	0.0039	0.00675338	0.00234723	0.7476	A
FatherMetal_Lifespan+AttainedAge	2	63405218	rs13009169	4.031e-05	698000	0.007841	0.007501	0.002821	0.00022	0.00898076	0.00242974	0.7267	G
FatherMetal_Lifespan+AttainedAge	2	66232736	rs1484483	0.0008718	698000	0.02243	-0.009153	0.004009	0.004	-0.00996411	0.00345012	0.8987	A
FatherMetal_Lifespan+AttainedAge	2	68579931	rs7578047	0.0002175	698000	0.008856	0.009756	0.003727	0.0018	0.00994573	0.00322311	0.969	A
FatherMetal_Lifespan+AttainedAge	2	68579972	rs7604812	0.0001913	698000	0.003272	0.0105	0.003571	0.0041	0.00873499	0.00308998	0.7389	G
FatherMetal_Lifespan+AttainedAge	2	68622990	rs6725743	0.0002066	698000	0.001318	0.01195	0.00372	0.0096	0.00810324	0.00318905	0.4915	A
FatherMetal_Lifespan+AttainedAge	2	69064232	rs8179547	0.0003231	698000	0.01183	0.006829	0.002713	0.0022	0.00714743	0.00234005	0.9407	C
FatherMetal_Lifespan+AttainedAge	2	70389900	rs11677137	0.002026	697000	0.0177	-0.009623	0.004057	0.015	-0.00850643	0.00343458	0.8395	A
FatherMetal_Lifespan+AttainedAge	2	75977535	rs11675641	0.0006796	697000	0.003439	0.01345	0.004599	0.017	0.00977133	0.00401658	0.5395	A
FatherMetal_Lifespan+AttainedAge	2	77143070	rs7592470	0.0009733	690000	0.1662	0.003972	0.002869	0.00026	0.00868518	0.00239992	0.2352	G
FatherMetal_Lifespan+AttainedAge	2	85434540	rs4832148	0.002474	697000	0.001768	0.009979	0.003192	0.1	0.00455667	0.00279184	0.2324	A
FatherMetal_Lifespan+AttainedAge	2	85738374	rs7591175	0.0004059	698000	1.63e-05	-0.011	0.002551	0.19	-0.00281563	0.00219565	0.02711	C
FatherMetal_Lifespan+AttainedAge	2	85755357	rs6739015	0.001066	697000	3.558e-05	-0.01064	0.002573	0.28	-0.0023065	0.0021959	0.02595	A
FatherMetal_Lifespan+AttainedAge	2	85762209	rs1446669	0.001971	696000	0.0007234	-0.009378	0.002774	0.13	-0.00358468	0.00236227	0.1469	A
FatherMetal_Lifespan+AttainedAge	2	85814984	rs10206961	0.001705	698000	1.66e-06	-0.01235	0.002578	0.79	-0.000475762	0.00221135	0.001562	G
FatherMetal_Lifespan+AttainedAge	2	100602759	rs13032879	0.0002037	698000	0.006752	0.009711	0.003585	0.0022	0.00949359	0.00309017	0.9535	G
FatherMetal_Lifespan+AttainedAge	2	100671449	rs4851244	0.001573	699000	0.03949	0.006845	0.003324	0.0046	0.00812794	0.002843	0.7974	A
FatherMetal_Lifespan+AttainedAge	2	101143716	rs17024489	0.001086	698000	0.004101	0.009444	0.00329	0.025	0.00640574	0.00282311	0.5104	A
FatherMetal_Lifespan+AttainedAge	2	101145430	rs2176733	0.002173	698000	0.008092	0.006729	0.002541	0.032	0.00472073	0.0021738	0.5745	G
FatherMetal_Lifespan+AttainedAge	2	101150154	rs7596463	0.001762	699000	0.003108	0.009377	0.003171	0.051	0.00544955	0.00272701	0.3736	A
FatherMetal_Lifespan+AttainedAge	2	101183475	rs2946589	0.0009427	697000	0.002585	-0.007683	0.00255	0.03	-0.00479024	0.00217919	0.4216	G
FatherMetal_Lifespan+AttainedAge	2	103317676	rs17776702	0.00178	698000	0.05088	-0.01591	0.008147	0.004	-0.0209744	0.00735786	0.7213	A
FatherMetal_Lifespan+AttainedAge	2	104742560	rs13404302	0.0008918	698000	0.1	0.01047	0.006366	0.00054	0.0196358	0.00566119	0.3601	G
FatherMetal_Lifespan+AttainedAge	2	105309317	rs4851704	0.0004104	698000	0.0105	-0.01793	0.007008	0.0034	-0.017658	0.00599577	0.9726	G
FatherMetal_Lifespan+AttainedAge	2	105343111	rs4851709	0.0008581	698000	0.01239	-0.01952	0.007805	0.0073	-0.0177395	0.00662494	0.8891	C
FatherMetal_Lifespan+AttainedAge	2	106654062	rs11901318	0.002486	698000	0.04051	-0.007513	0.003668	0.0083	-0.00843489	0.00317024	0.8821	A
FatherMetal_Lifespan+AttainedAge	2	109932096	rs17035400	0.000286	698000	0.0008339	-0.0104	0.003112	0.019	-0.00639986	0.0026737	0.356	G
FatherMetal_Lifespan+AttainedAge	2	109939843	rs11689995	0.002169	699000	0.002254	0.007737	0.002533	0.077	0.00392713	0.0021744	0.2863	G
FatherMetal_Lifespan+AttainedAge	2	109962283	rs6710178	0.0002371	698000	0.0009716	-0.01115	0.00338	0.014	-0.00729371	0.00290245	0.4083	A
FatherMetal_Lifespan+AttainedAge	2	112651405	rs4535048	0.0004631	697000	0.001301	0.01366	0.004247	0.023	0.00832175	0.00365283	0.3777	G
FatherMetal_Lifespan+AttainedAge	2	112754828	rs3811632	0.0005752	698000	0.0004917	0.009822	0.002818	0.053	0.00470729	0.00238982	0.2055	C
FatherMetal_Lifespan+AttainedAge	2	112803874	rs6748256	0.001041	697000	0.004292	-0.007295	0.002554	0.023	-0.00498335	0.00218648	0.5272	A
FatherMetal_Lifespan+AttainedAge	2	112816047	rs4848978	0.0001147	698000	0.00152	0.00894	0.002819	0.0044	0.00688112	0.00239903	0.6122	G
FatherMetal_Lifespan+AttainedAge	2	112844091	rs4613287	0.001378	698000	0.003048	0.007814	0.002637	0.04	0.00464369	0.00224781	0.4042	G
FatherMetal_Lifespan+AttainedAge	2	112856165	rs4849007	0.001348	698000	0.03077	0.005495	0.002544	0.005	0.00610588	0.00217591	0.8652	A
FatherMetal_Lifespan+AttainedAge	2	113935028	rs4849163	0.001097	697000	0.215	0.003891	0.003138	0.00018	0.01019	0.00272466	0.1734	A
FatherMetal_Lifespan+AttainedAge	2	113935222	rs10864910	0.001171	698000	0.1311	0.005058	0.003351	0.00052	0.0100907	0.00290844	0.3099	G
FatherMetal_Lifespan+AttainedAge	2	113945334	rs3791336	0.002367	698000	0.04491	0.00519	0.002588	0.0069	0.0059503	0.00222305	0.83	A
FatherMetal_Lifespan+AttainedAge	2	138420996	rs10206850	0.0006596	697000	3.563e-05	0.01068	0.002583	0.2	0.00278246	0.00219236	0.03499	G
FatherMetal_Lifespan+AttainedAge	2	142180831	rs6717169	0.0009704	698000	7.595e-05	-0.01275	0.003222	0.2	-0.00363863	0.00275928	0.04756	A
FatherMetal_Lifespan+AttainedAge	2	142530945	rs16847120	0.00148	698000	0.01264	0.006585	0.002641	0.014	0.00542413	0.00224507	0.7882	C
FatherMetal_Lifespan+AttainedAge	2	142562218	rs1009398	0.001076	698000	0.001199	0.008296	0.002561	0.057	0.00407342	0.00218095	0.2651	G
FatherMetal_Lifespan+AttainedAge	2	142567010	rs974974	0.0004673	697000	0.01231	-0.006591	0.002633	0.0034	-0.00655897	0.00224604	1	A
FatherMetal_Lifespan+AttainedAge	2	142567218	rs974973	0.0002834	697000	0.00301	-0.008086	0.002725	0.007	-0.0061803	0.00232456	0.6471	A
FatherMetal_Lifespan+AttainedAge	2	142602912	rs1541976	0.002458	697000	0.1253	0.003954	0.002579	0.0018	0.00676346	0.00219332	0.4302	C
FatherMetal_Lifespan+AttainedAge	2	142819607	rs11688838	1.721e-06	697000	0.0003559	-0.009127	0.002556	0.00011	-0.00849425	0.00218032	0.8549	A
FatherMetal_Lifespan+AttainedAge	2	142824137	rs4662219	0.0001563	698000	0.001085	-0.008535	0.002612	0.0082	-0.00601571	0.00223279	0.4875	G
FatherMetal_Lifespan+AttainedAge	2	142876051	rs2290140	0.0009355	698000	0.01327	-0.006648	0.002684	0.0076	-0.00623379	0.00229501	0.8958	G
FatherMetal_Lifespan+AttainedAge	2	142878411	rs10193058	0.002452	698000	0.159	-0.003811	0.002706	0.0012	-0.0075065	0.00231758	0.3434	G
FatherMetal_Lifespan+AttainedAge	2	144194565	rs17230746	0.002066	698000	0.002675	-0.009072	0.003021	0.066	-0.00471056	0.00257431	0.3225	G
FatherMetal_Lifespan+AttainedAge	2	154085028	rs2881710	0.001719	698000	0.08473	-0.0047	0.002726	0.0019	-0.00714079	0.00231271	0.5155	C
FatherMetal_Lifespan+AttainedAge	2	154141087	rs9288196	0.000679	698000	0.05121	0.004973	0.00255	0.001	0.00705138	0.00218914	0.5464	G
FatherMetal_Lifespan+AttainedAge	2	154151887	rs7574077	0.002326	693000	0.007575	-0.009862	0.003693	0.036	-0.00660521	0.00317479	0.5366	A
FatherMetal_Lifespan+AttainedAge	2	158672783	rs17798260	0.0004951	697000	0.0004232	-0.04328	0.01228	0.05	-0.0218965	0.0113079	0.1999	A
FatherMetal_Lifespan+AttainedAge	2	160897655	rs16844706	0.0003031	697000	0.0005344	0.0135	0.003899	0.027	0.00718879	0.00329842	0.2759	A
FatherMetal_Lifespan+AttainedAge	2	164454604	rs4668424	0.001143	697000	0.07678	-0.007518	0.004248	0.0012	-0.0120938	0.00369036	0.4872	G
FatherMetal_Lifespan+AttainedAge	2	168103701	rs16853313	0.002478	696000	0.07763	0.01073	0.006081	0.0037	0.0148981	0.0050561	0.6204	A
FatherMetal_Lifespan+AttainedAge	2	169401278	rs11695350	0.001334	699000	0.01577	-0.006844	0.002835	0.01	-0.00616829	0.00241231	0.8865	G
FatherMetal_Lifespan+AttainedAge	2	169402127	rs716335	0.001841	698000	0.008708	0.006992	0.002665	0.025	0.00512959	0.00231544	0.6265	G
FatherMetal_Lifespan+AttainedAge	2	169414380	rs12463569	0.0003945	697000	0.01789	0.006797	0.00287	0.0018	0.00776708	0.00251191	0.8347	A
FatherMetal_Lifespan+AttainedAge	2	173867808	rs7604728	0.0008743	698000	0.01251	0.007272	0.002912	0.0074	0.00652954	0.00248622	0.8879	A
FatherMetal_Lifespan+AttainedAge	2	174680163	rs907956	0.0004479	698000	3.108e-05	-0.01498	0.003597	0.16	-0.00434036	0.00303387	0.04012	G
FatherMetal_Lifespan+AttainedAge	2	175467910	rs4972452	0.002245	698000	0.01204	0.006404	0.00255	0.024	0.00502981	0.00217954	0.6893	C
FatherMetal_Lifespan+AttainedAge	2	182504802	rs7602326	0.0002926	698000	0.2981	0.00273	0.002624	7.9e-06	0.0101148	0.00225086	0.05342	A
FatherMetal_Lifespan+AttainedAge	2	182515795	rs3910664	0.001515	698000	0.5646	0.001495	0.002595	2.4e-05	0.00946849	0.00222538	0.03491	A
FatherMetal_Lifespan+AttainedAge	2	183695449	rs288316	0.002004	698000	0.1724	0.004229	0.003099	0.00075	0.00912194	0.00268337	0.2907	G
FatherMetal_Lifespan+AttainedAge	2	183728290	rs7607737	0.002426	698000	0.01407	0.009585	0.003903	0.023	0.00769095	0.00339202	0.7255	G
FatherMetal_Lifespan+AttainedAge	2	185111870	rs985366	0.002102	698000	0.07959	-0.005598	0.003193	0.0028	-0.00807857	0.00273432	0.5755	A
FatherMetal_Lifespan+AttainedAge	2	185992567	rs4667014	0.002487	698000	0.03969	-0.005381	0.002616	0.0085	-0.00581283	0.00223603	0.8904	G
FatherMetal_Lifespan+AttainedAge	2	186067813	rs17762453	0.0002646	698000	0.0001562	0.01105	0.002922	0.049	0.00490684	0.00251323	0.1464	A
FatherMetal_Lifespan+AttainedAge	2	186088401	rs11683056	0.0001867	698000	0.0008436	-0.008512	0.00255	0.012	-0.00542864	0.00217765	0.4103	C
FatherMetal_Lifespan+AttainedAge	2	186107423	rs7590299	0.0007624	698000	0.0004529	0.009254	0.002639	0.072	0.00406111	0.00226916	0.1732	A
FatherMetal_Lifespan+AttainedAge	2	186120083	rs13392489	2.518e-05	698000	0.0006381	-0.008761	0.002566	0.0016	-0.00687454	0.00219171	0.6215	A
FatherMetal_Lifespan+AttainedAge	2	186172142	rs7557829	0.0001632	698000	0.0005572	0.008979	0.002601	0.014	0.00541727	0.00223062	0.3504	A
FatherMetal_Lifespan+AttainedAge	2	188236000	rs13411274	0.001328	698000	0.03251	0.005774	0.002701	0.0046	0.00675718	0.00233908	0.841	A
FatherMetal_Lifespan+AttainedAge	2	188332692	rs8176592	0.0003382	696000	0.02852	0.006058	0.002766	0.00082	0.00813018	0.00238525	0.643	A
FatherMetal_Lifespan+AttainedAge	2	189460553	rs8273	0.001757	695000	0.007713	-0.0106	0.003978	0.026	-0.00757883	0.00338831	0.5942	G
FatherMetal_Lifespan+AttainedAge	2	198198852	rs7578368	0.0009933	693000	0.0002102	0.01244	0.003357	0.13	0.00423737	0.00279993	0.09239	A
FatherMetal_Lifespan+AttainedAge	2	200853425	rs17445724	0.000541	698000	0.1768	-0.004823	0.00357	8.2e-05	-0.0120839	0.00305562	0.1604	A
FatherMetal_Lifespan+AttainedAge	2	201111241	rs12614633	0.0003124	693000	0.2129	-0.003993	0.003206	2.2e-05	-0.0116888	0.00274355	0.1004	G
FatherMetal_Lifespan+AttainedAge	2	201135222	rs13006859	0.0006004	697000	0.1915	-0.004146	0.003174	8.3e-05	-0.0107553	0.00272852	0.1528	G
FatherMetal_Lifespan+AttainedAge	2	201211605	rs3769466	0.00242	698000	0.08774	-0.005465	0.0032	0.003	-0.00821442	0.00275819	0.5627	G
FatherMetal_Lifespan+AttainedAge	2	201356552	rs10931901	0.00205	698000	0.0006778	0.008662	0.002549	0.14	0.00328335	0.00219554	0.1389	G
FatherMetal_Lifespan+AttainedAge	2	201582193	rs2348114	0.00161	698000	0.06341	-0.008462	0.004559	0.0026	-0.0119428	0.00395218	0.6153	G
FatherMetal_Lifespan+AttainedAge	2	207800908	rs4675643	0.001846	698000	0.007592	-0.007829	0.002933	0.028	-0.00540734	0.00250629	0.5854	A
FatherMetal_Lifespan+AttainedAge	2	208176487	rs2194374	0.0007266	699000	0.05902	0.004874	0.002581	0.0009	0.00733735	0.00222182	0.5066	A
FatherMetal_Lifespan+AttainedAge	2	208229097	rs11677973	4.911e-05	698000	0.006648	-0.008645	0.003185	0.00035	-0.00954432	0.00269876	0.8089	A
FatherMetal_Lifespan+AttainedAge	2	208263279	rs11692326	1.223e-05	697000	0.005129	-0.008594	0.00307	7.3e-05	-0.0101595	0.00258247	0.681	G
FatherMetal_Lifespan+AttainedAge	2	208297345	rs13421357	5.629e-05	698000	0.002984	-0.01068	0.003597	0.001	-0.00972657	0.00300675	0.9177	C
FatherMetal_Lifespan+AttainedAge	2	211680401	rs16844960	0.001747	698000	3.496e-05	-0.03889	0.009398	0.39	-0.00678933	0.00815415	0.01839	A
FatherMetal_Lifespan+AttainedAge	2	212300055	rs6742399	0.002052	698000	0.7265	-0.0009148	0.002615	1.7e-05	-0.00963097	0.00224882	0.02071	G
FatherMetal_Lifespan+AttainedAge	3	3101825	rs9310935	0.0002797	698000	0.02076	0.00589	0.002547	0.00094	0.00728065	0.00218369	0.7168	A
FatherMetal_Lifespan+AttainedAge	3	3776465	rs6783172	0.001972	698000	0.02155	0.01142	0.004968	0.012	0.0106761	0.00419243	0.9199	G
FatherMetal_Lifespan+AttainedAge	3	3776669	rs769795	0.001703	698000	0.04658	0.005681	0.002855	0.0042	0.00706494	0.00244896	0.7477	G
FatherMetal_Lifespan+AttainedAge	3	3780926	rs769621	0.000312	699000	0.1014	0.005467	0.003337	0.0001	0.0112183	0.00287141	0.2394	G
FatherMetal_Lifespan+AttainedAge	3	3781877	rs711562	0.002038	698000	0.07157	0.005521	0.003064	0.0031	0.00787868	0.0026229	0.6112	G
FatherMetal_Lifespan+AttainedAge	3	3788916	rs769618	0.0008166	698000	0.03011	0.005938	0.002738	0.0026	0.00712069	0.0023441	0.775	A
FatherMetal_Lifespan+AttainedAge	3	3796045	rs711544	0.0007555	698000	0.1927	0.004555	0.003497	0.00012	0.0115957	0.0030116	0.1671	A
FatherMetal_Lifespan+AttainedAge	3	4403537	rs4685744	0.001274	697000	0.007255	0.006855	0.002553	0.019	0.00501933	0.00217701	0.6375	G
FatherMetal_Lifespan+AttainedAge	3	4403614	rs2819562	0.001933	698000	0.004431	-0.007278	0.002557	0.044	-0.00428276	0.00218208	0.4368	A
FatherMetal_Lifespan+AttainedAge	3	4430848	rs7641926	0.001452	694000	0.009848	-0.006693	0.002593	0.017	-0.00524558	0.00226474	0.7015	A
FatherMetal_Lifespan+AttainedAge	3	4451420	rs17040638	0.001515	698000	0.06305	-0.01002	0.005389	0.0024	-0.0146473	0.00478215	0.6065	G
FatherMetal_Lifespan+AttainedAge	3	8143674	rs6785623	0.001595	694000	0.02265	-0.005895	0.002586	0.0087	-0.0056508	0.00219903	0.974	G
FatherMetal_Lifespan+AttainedAge	3	8151457	rs17753054	0.0007829	698000	0.007871	-0.006766	0.002546	0.01	-0.00553354	0.00218608	0.7548	A
FatherMetal_Lifespan+AttainedAge	3	8159754	rs9858249	5.838e-05	698000	4.06e-05	0.01244	0.003032	0.026	0.00567574	0.00258228	0.1278	A
FatherMetal_Lifespan+AttainedAge	3	8160466	rs7645904	2.544e-05	698000	4.65e-05	0.01122	0.002755	0.011	0.00594918	0.00236409	0.1893	A
FatherMetal_Lifespan+AttainedAge	3	8168963	rs2633644	0.0003974	698000	0.0006608	0.008793	0.002582	0.031	0.00471801	0.00222091	0.2807	A
FatherMetal_Lifespan+AttainedAge	3	8177234	rs4684581	2.626e-05	698000	8.369e-05	0.01126	0.002862	0.0078	0.00654172	0.00245347	0.2518	A
FatherMetal_Lifespan+AttainedAge	3	8182914	rs11715664	4.454e-05	698000	4.997e-05	0.01314	0.003239	0.018	0.00650532	0.00275738	0.1598	A
FatherMetal_Lifespan+AttainedAge	3	8194734	rs9681162	0.001251	698000	0.001939	0.008654	0.002792	0.049	0.00472069	0.0023918	0.3277	A
FatherMetal_Lifespan+AttainedAge	3	8212656	rs13318406	8.686e-05	696000	7.668e-05	0.01315	0.003326	0.026	0.00623346	0.00281294	0.154	C
FatherMetal_Lifespan+AttainedAge	3	8238326	rs3912613	2.071e-05	698000	3.289e-06	0.01218	0.002617	0.038	0.00466757	0.00224579	0.04638	A
FatherMetal_Lifespan+AttainedAge	3	8238518	rs4686232	4.358e-05	698000	1.027e-05	0.0127	0.002878	0.041	0.00501181	0.00244933	0.06522	G
FatherMetal_Lifespan+AttainedAge	3	8240382	rs1488793	0.001531	696000	0.0001554	0.01008	0.002665	0.21	0.00272677	0.00226041	0.05969	G
FatherMetal_Lifespan+AttainedAge	3	10302172	rs394558	0.0005675	698000	0.03711	-0.005408	0.002594	0.0012	-0.00732492	0.00222554	0.6316	G
FatherMetal_Lifespan+AttainedAge	3	10308326	rs1642974	0.0008814	698000	0.125	-0.004145	0.002702	0.00036	-0.00847051	0.00233022	0.2908	A
FatherMetal_Lifespan+AttainedAge	3	10511602	rs11928209	0.002487	698000	0.02028	-0.006201	0.002672	0.017	-0.00549075	0.00231039	0.8487	A
FatherMetal_Lifespan+AttainedAge	3	12487650	rs6806708	0.0006079	698000	0.03996	0.005827	0.002837	0.0012	0.00778635	0.00243666	0.6173	C
FatherMetal_Lifespan+AttainedAge	3	12494794	rs2249407	7.221e-06	698000	0.006817	0.006898	0.002549	2.4e-05	0.00918479	0.00218609	0.526	A
FatherMetal_Lifespan+AttainedAge	3	12496461	rs9872031	3.373e-05	698000	0.01112	-0.006552	0.002581	0.00011	-0.00848834	0.00220193	0.5923	G
FatherMetal_Lifespan+AttainedAge	3	12607929	rs2454427	9.717e-05	650000	0.003279	-0.009932	0.003378	0.0017	-0.00804521	0.00261601	0.7353	G
FatherMetal_Lifespan+AttainedAge	3	14877535	rs1077535	0.001446	698000	0.8106	0.0006148	0.002566	5.7e-07	-0.011139	0.00221697	0.001705	A
FatherMetal_Lifespan+AttainedAge	3	14890939	rs6789614	0.002147	698000	0.4302	0.002009	0.002547	9.5e-08	-0.0116915	0.00218326	0.0002015	A
FatherMetal_Lifespan+AttainedAge	3	14932502	rs17040514	0.0006045	698000	0.006953	-0.03004	0.01113	0.0082	-0.02663	0.010242	0.7627	A
FatherMetal_Lifespan+AttainedAge	3	15512276	rs2305618	0.00167	650000	0.01288	0.01825	0.007337	0.015	0.0136637	0.00574836	0.6814	C
FatherMetal_Lifespan+AttainedAge	3	18669957	rs4588383	0.0008541	698000	0.01853	0.006752	0.002867	0.0048	0.00684954	0.00244477	0.9654	C
FatherMetal_Lifespan+AttainedAge	3	18674920	rs4280655	0.001524	698000	0.1283	-0.004018	0.002642	0.00082	-0.00765688	0.0022746	0.351	G
FatherMetal_Lifespan+AttainedAge	3	18781973	rs9876614	0.0002042	698000	0.0394	-0.005262	0.002554	0.00025	-0.00813194	0.00218481	0.4544	A
FatherMetal_Lifespan+AttainedAge	3	18824298	rs7428918	0.0006654	698000	0.004663	0.008032	0.002839	0.013	0.00601197	0.00242568	0.6261	G
FatherMetal_Lifespan+AttainedAge	3	20638228	rs6769686	0.002136	698000	0.007885	-0.01142	0.0043	0.032	-0.00782389	0.00366889	0.5692	A
FatherMetal_Lifespan+AttainedAge	3	20713455	rs2886695	0.002161	698000	0.01265	-0.007276	0.002918	0.022	-0.00582523	0.00251184	0.713	G
FatherMetal_Lifespan+AttainedAge	3	25318014	rs4681015	0.001857	697000	0.01473	0.006226	0.002553	0.016	0.00527242	0.00218102	0.7926	G
FatherMetal_Lifespan+AttainedAge	3	25388313	rs12497123	0.001613	698000	0.001077	0.009915	0.003032	0.089	0.00451728	0.00255789	0.209	C
FatherMetal_Lifespan+AttainedAge	3	27188306	rs1522166	0.0009072	698000	0.003741	-0.009409	0.003245	0.022	-0.00631284	0.00275055	0.5163	A
FatherMetal_Lifespan+AttainedAge	3	27339326	rs17317435	0.002374	698000	0.01515	-0.007631	0.003142	0.021	-0.00612055	0.00263676	0.7545	A
FatherMetal_Lifespan+AttainedAge	3	27390490	rs6551194	0.0009376	698000	0.002462	-0.008532	0.002818	0.031	-0.00508658	0.00239048	0.4138	C
FatherMetal_Lifespan+AttainedAge	3	27427225	rs1472254	0.0009451	698000	0.01571	0.006164	0.002552	0.0065	0.00611948	0.00217933	0.9542	G
FatherMetal_Lifespan+AttainedAge	3	27431898	rs13068734	0.001207	696000	0.003727	-0.01123	0.003873	0.03	-0.00714243	0.00330597	0.4676	C
FatherMetal_Lifespan+AttainedAge	3	27432995	rs2307032	0.0005277	698000	0.004856	0.007549	0.00268	0.0096	0.00606935	0.00229119	0.6788	A
FatherMetal_Lifespan+AttainedAge	3	27458914	rs923941	0.0001826	697000	0.01335	-0.007229	0.002922	0.0009	-0.00813633	0.00245018	0.7996	A
FatherMetal_Lifespan+AttainedAge	3	27490194	rs13096477	0.0002559	697000	0.02611	-0.006696	0.00301	0.00062	-0.00861832	0.00252405	0.6256	A
FatherMetal_Lifespan+AttainedAge	3	27549188	rs820429	0.001058	695000	0.02647	0.005801	0.002614	0.0043	0.00639251	0.00222556	0.881	C
FatherMetal_Lifespan+AttainedAge	3	27562613	rs2643825	1.687e-05	698000	0.0003454	-0.00976	0.002727	0.0017	-0.00722853	0.00231181	0.538	A
FatherMetal_Lifespan+AttainedAge	3	27572710	rs1845700	0.0001607	698000	0.0001084	-0.01114	0.002878	0.038	-0.00504963	0.00244764	0.1464	A
FatherMetal_Lifespan+AttainedAge	3	27839134	rs2371117	0.002028	698000	0.1407	0.003828	0.002599	0.0011	0.00774535	0.00240337	0.3597	G
FatherMetal_Lifespan+AttainedAge	3	32864541	rs4909038	0.001663	698000	1.188e-05	-0.01398	0.003192	0.51	-0.00182288	0.00274659	0.008167	G
FatherMetal_Lifespan+AttainedAge	3	32879663	rs9832642	0.0003827	698000	1.73e-06	-0.01367	0.002859	0.37	-0.00217023	0.0024457	0.005378	A
FatherMetal_Lifespan+AttainedAge	3	32890314	rs6550166	0.0012	697000	7.97e-06	-0.01392	0.003117	0.47	-0.00198098	0.00265411	0.007615	A
FatherMetal_Lifespan+AttainedAge	3	32898205	rs4909018	0.001456	698000	2.196e-05	0.01078	0.002541	0.4	0.00187787	0.00218436	0.01462	A
FatherMetal_Lifespan+AttainedAge	3	37996268	rs11919078	0.001653	698000	0.08461	-0.006496	0.003767	0.0018	-0.00991753	0.00318339	0.5112	G
FatherMetal_Lifespan+AttainedAge	3	38635072	rs9311194	0.001562	698000	0.09444	-0.005424	0.003243	0.0014	-0.00896227	0.00278242	0.4608	G
FatherMetal_Lifespan+AttainedAge	3	39340292	rs11719029	0.0007941	698000	0.05289	0.008217	0.004245	0.0012	0.011742	0.0036676	0.5603	A
FatherMetal_Lifespan+AttainedAge	3	40901652	rs9840937	0.0009033	698000	0.04916	-0.005283	0.002685	0.0016	-0.00734428	0.00231396	0.6096	G
FatherMetal_Lifespan+AttainedAge	3	41037617	rs11716816	0.001317	699000	0.0005114	-0.008862	0.002551	0.11	-0.00353452	0.00219186	0.1447	G
FatherMetal_Lifespan+AttainedAge	3	46299765	rs7652290	0.0005367	697000	0.141	0.004027	0.002736	0.00013	0.00903984	0.00235955	0.212	A
FatherMetal_Lifespan+AttainedAge	3	46336781	rs7645716	0.0004557	698000	0.159	0.004145	0.002943	7.7e-05	0.0102169	0.00256013	0.17	G
FatherMetal_Lifespan+AttainedAge	3	47168219	rs11717033	0.001612	695000	0.05733	0.01125	0.005917	0.003	0.015707	0.00531404	0.6626	A
FatherMetal_Lifespan+AttainedAge	3	48556339	rs2267846	0.002206	697000	0.08175	-0.00494	0.002838	0.0029	-0.00740501	0.00246241	0.5754	G
FatherMetal_Lifespan+AttainedAge	3	48731487	rs3172494	4.304e-05	698000	0.0002883	0.01461	0.00403	0.0055	0.00962081	0.00351815	0.3879	C
FatherMetal_Lifespan+AttainedAge	3	49162284	rs34759087	6.759e-06	698000	0.0001669	0.01458	0.003874	0.0011	0.0108588	0.00335439	0.5025	G
FatherMetal_Lifespan+AttainedAge	3	49678651	rs4283605	5.863e-07	698000	0.0001847	0.0104	0.002782	5.6e-05	0.00948917	0.00238836	0.8431	A
FatherMetal_Lifespan+AttainedAge	3	49792023	rs9872864	7.97e-05	698000	0.0004393	-0.008932	0.002541	0.0078	-0.00561954	0.00217332	0.3921	G
FatherMetal_Lifespan+AttainedAge	3	49924424	rs11713193	0.0002354	698000	0.001524	0.00806	0.002543	0.0099	0.00547147	0.00217425	0.5054	A
FatherMetal_Lifespan+AttainedAge	3	50174572	rs13100903	0.001539	697000	0.0201	-0.006259	0.002693	0.0094	-0.00581078	0.00227397	0.9432	G
FatherMetal_Lifespan+AttainedAge	3	52853401	rs3821831	0.001219	698000	0.01059	0.006687	0.002616	0.013	0.00556118	0.00224885	0.7655	G
FatherMetal_Lifespan+AttainedAge	3	52956918	rs11130331	0.0007691	698000	0.009296	-0.006878	0.002644	0.0084	-0.00592516	0.00225831	0.8128	A
FatherMetal_Lifespan+AttainedAge	3	53155158	rs9757079	0.001453	698000	0.04226	0.005514	0.002715	0.0038	0.00680093	0.00233567	0.7554	G
FatherMetal_Lifespan+AttainedAge	3	56028793	rs9809605	0.0003059	697000	0.000918	0.008716	0.00263	0.019	0.00529494	0.00226865	0.3639	A
FatherMetal_Lifespan+AttainedAge	3	56104964	rs9818750	0.001733	698000	0.007617	0.007052	0.002643	0.026	0.00496295	0.00228442	0.5979	A
FatherMetal_Lifespan+AttainedAge	3	56234932	rs991335	0.0001718	698000	0.0007482	0.008814	0.002614	0.012	0.00559569	0.00226027	0.3983	G
FatherMetal_Lifespan+AttainedAge	3	56307703	rs6763275	0.0006124	697000	0.0001611	0.009804	0.002598	0.1	0.00358167	0.00222922	0.1007	G
FatherMetal_Lifespan+AttainedAge	3	56350395	rs6780890	0.001872	698000	0.04285	-0.01228	0.006063	0.0053	-0.0145339	0.0051825	0.8014	A
FatherMetal_Lifespan+AttainedAge	3	56383404	rs6445782	8.951e-06	698000	0.002375	-0.0233	0.007667	0.00012	-0.0252398	0.00649478	0.858	G
FatherMetal_Lifespan+AttainedAge	3	60358100	rs3732551	0.001836	698000	0.03378	-0.00562	0.002647	0.0068	-0.00622145	0.00229552	0.8921	G
FatherMetal_Lifespan+AttainedAge	3	60372036	rs2687169	0.00068	698000	0.03037	-0.005761	0.002661	0.002	-0.00710487	0.00230355	0.7377	G
FatherMetal_Lifespan+AttainedAge	3	68610847	rs9835386	0.001619	698000	0.04318	0.005763	0.00285	0.0043	0.00700565	0.00243299	0.7692	G
FatherMetal_Lifespan+AttainedAge	3	69038217	rs4855543	7.494e-05	698000	5.723e-05	0.01023	0.002543	0.027	0.00498046	0.00217281	0.14	A
FatherMetal_Lifespan+AttainedAge	3	69087412	rs9809889	0.0003685	698000	4.2e-06	-0.01175	0.002555	0.28	-0.00250424	0.00219033	0.01079	C
FatherMetal_Lifespan+AttainedAge	3	69114005	rs2118539	0.0002136	695000	0.0001063	0.009941	0.002565	0.049	0.00442693	0.0021757	0.1266	G
FatherMetal_Lifespan+AttainedAge	3	69365528	rs1872152	0.002435	698000	0.03052	0.006733	0.003112	0.011	0.00692207	0.00268946	0.9926	G
FatherMetal_Lifespan+AttainedAge	3	70186696	rs7633462	0.0009093	697000	0.09492	-0.006994	0.004188	0.00061	-0.0121806	0.00353507	0.3819	C
FatherMetal_Lifespan+AttainedAge	3	73906871	rs973538	0.002037	698000	0.01302	-0.006722	0.002707	0.02	-0.00555718	0.00232674	0.7342	A
FatherMetal_Lifespan+AttainedAge	3	76933219	rs11127568	0.002442	697000	0.02605	0.0108	0.004854	0.013	0.0106491	0.00422506	0.9434	A
FatherMetal_Lifespan+AttainedAge	3	82469376	rs13095290	0.0008221	693000	0.02304	-0.009131	0.004017	0.0036	-0.01007	0.00335383	0.8885	G
FatherMetal_Lifespan+AttainedAge	3	94234304	rs1948183	0.001542	698000	0.06629	-0.004718	0.002569	0.0023	-0.00664436	0.00219239	0.5906	A
FatherMetal_Lifespan+AttainedAge	3	98174258	rs7614425	0.0005197	699000	0.008742	-0.01162	0.004432	0.0055	-0.0106343	0.00385571	0.8668	G
FatherMetal_Lifespan+AttainedAge	3	105370343	rs9857831	0.0006716	698000	0.05408	-0.005152	0.002675	0.00091	-0.00764136	0.00230689	0.5251	A
FatherMetal_Lifespan+AttainedAge	3	105523704	rs12632980	0.002078	698000	0.06279	0.007126	0.00383	0.0038	0.00930485	0.00318466	0.6681	A
FatherMetal_Lifespan+AttainedAge	3	105576911	rs3996189	0.002154	698000	0.08382	0.005173	0.002992	0.0027	0.00771855	0.002527	0.5603	A
FatherMetal_Lifespan+AttainedAge	3	107575074	rs9852257	0.0004986	698000	0.00504	-0.007395	0.002637	0.0087	-0.00590084	0.00226998	0.7003	C
FatherMetal_Lifespan+AttainedAge	3	107594886	rs1991783	0.001781	697000	0.02487	-0.005957	0.002655	0.0091	-0.00585549	0.00227539	0.9939	A
FatherMetal_Lifespan+AttainedAge	3	112860780	rs2613964	0.002339	698000	0.001626	0.008389	0.002662	0.1	0.00383475	0.00228971	0.2275	G
FatherMetal_Lifespan+AttainedAge	3	115424974	rs824354	0.001985	699000	0.001793	-0.008082	0.002588	0.081	-0.00382174	0.00221194	0.2596	A
FatherMetal_Lifespan+AttainedAge	3	115437175	rs2918208	0.001874	698000	0.006816	-0.006994	0.002585	0.031	-0.00474849	0.00221184	0.5525	G
FatherMetal_Lifespan+AttainedAge	3	126573995	rs11714878	0.001799	698000	0.1803	0.004909	0.003664	0.00058	0.0109756	0.00320952	0.2652	A
FatherMetal_Lifespan+AttainedAge	3	130084939	rs16826828	0.0006215	698000	0.0008557	-0.01629	0.004887	0.041	-0.00823133	0.00413862	0.2727	A
FatherMetal_Lifespan+AttainedAge	3	134843286	rs2140766	0.001443	698000	0.003519	0.007655	0.002623	0.038	0.00471712	0.00224792	0.4293	A
FatherMetal_Lifespan+AttainedAge	3	135213840	rs11915808	0.0003012	698000	0.0059	0.008865	0.00322	0.0041	0.00777972	0.00278189	0.8392	G
FatherMetal_Lifespan+AttainedAge	3	135889651	rs13065565	0.001772	696000	0.02256	0.01019	0.004469	0.01	0.00967613	0.0038037	0.9549	A
FatherMetal_Lifespan+AttainedAge	3	135914476	rs9845457	5.177e-05	693000	0.02107	0.006034	0.002616	8.5e-05	0.00866962	0.00221672	0.4719	A
FatherMetal_Lifespan+AttainedAge	3	135917197	rs35087366	0.001151	698000	0.05818	0.007471	0.003944	0.0018	0.0104492	0.00337618	0.5881	G
FatherMetal_Lifespan+AttainedAge	3	135932359	rs687339	0.0004039	698000	0.03003	0.00655	0.003019	0.00098	0.00853708	0.00259554	0.6495	A
FatherMetal_Lifespan+AttainedAge	3	135933264	rs1279831	0.002052	698000	0.2424	-0.003005	0.00257	0.0004	-0.00785038	0.00219258	0.1967	A
FatherMetal_Lifespan+AttainedAge	3	135953476	rs661739	4.361e-05	697000	0.002412	0.007759	0.002557	0.0009	0.0073343	0.0021744	0.8938	A
FatherMetal_Lifespan+AttainedAge	3	136064547	rs695983	0.0008016	698000	0.01985	0.006504	0.002792	0.0041	0.00684838	0.0024044	0.9275	A
FatherMetal_Lifespan+AttainedAge	3	136067655	rs696517	0.0003963	697000	0.0222	0.007241	0.003166	0.0014	0.00858981	0.00270347	0.7568	G
FatherMetal_Lifespan+AttainedAge	3	136069472	rs667920	0.0002152	696000	0.01261	0.007527	0.003017	0.0012	0.0081996	0.00257307	0.8514	A
FatherMetal_Lifespan+AttainedAge	3	136097576	rs655836	0.002243	698000	0.2119	-0.00321	0.002572	0.00061	-0.00755654	0.00219436	0.2422	A
FatherMetal_Lifespan+AttainedAge	3	136111917	rs1145106	0.0004202	698000	0.03685	0.00596	0.002855	0.00079	0.00814992	0.00245053	0.5856	A
FatherMetal_Lifespan+AttainedAge	3	136208788	rs9883916	0.001321	698000	0.06015	0.0057	0.003032	0.0021	0.00797216	0.00260376	0.6001	A
FatherMetal_Lifespan+AttainedAge	3	136255169	rs833752	0.0002803	698000	0.03017	0.006279	0.002897	0.00058	0.0084524	0.00247836	0.5886	G
FatherMetal_Lifespan+AttainedAge	3	136346206	rs10935186	0.0009581	698000	0.1539	-0.003701	0.002595	0.00028	-0.00811976	0.00221617	0.242	A
FatherMetal_Lifespan+AttainedAge	3	136356464	rs9845762	0.0001974	698000	0.009328	0.007255	0.002791	0.0015	0.00748604	0.00239447	0.9332	A
FatherMetal_Lifespan+AttainedAge	3	136425600	rs13072691	0.001797	698000	0.1387	0.005784	0.003906	0.00093	0.0109319	0.00335305	0.3473	A
FatherMetal_Lifespan+AttainedAge	3	136539689	rs9682783	0.0005251	694000	0.04899	0.006108	0.003103	0.00074	0.00880963	0.00265576	0.5299	G
FatherMetal_Lifespan+AttainedAge	3	136671761	rs7648198	3.794e-05	697000	0.002971	0.007597	0.002557	0.00061	0.00757662	0.00220162	0.9788	A
FatherMetal_Lifespan+AttainedAge	3	136677581	rs12054220	1.028e-05	698000	0.001197	0.008254	0.002548	0.0003	0.00817367	0.00223976	0.9221	A
FatherMetal_Lifespan+AttainedAge	3	136752551	rs754694	0.0001336	698000	0.002681	0.007683	0.002559	0.0032	0.00657842	0.00218808	0.742	A
FatherMetal_Lifespan+AttainedAge	3	136755982	rs1470142	2.598e-05	698000	0.001366	0.008251	0.002577	0.00083	0.00747935	0.00221053	0.8157	A
FatherMetal_Lifespan+AttainedAge	3	136761075	rs9845921	0.0003717	697000	0.002054	-0.007838	0.002543	0.013	-0.00552558	0.00218088	0.5069	C
FatherMetal_Lifespan+AttainedAge	3	136795393	rs9819250	0.0002448	698000	0.003078	0.007764	0.002623	0.0058	0.00624776	0.00224277	0.6801	C
FatherMetal_Lifespan+AttainedAge	3	136835237	rs9855204	0.0003854	698000	0.000876	0.00897	0.002695	0.025	0.00531926	0.00232083	0.3295	A
FatherMetal_Lifespan+AttainedAge	3	137481510	rs11717337	0.0002708	698000	0.1146	-0.005828	0.003694	6.3e-05	-0.0125006	0.00316591	0.1992	G
FatherMetal_Lifespan+AttainedAge	3	141457998	rs1980190	0.002498	698000	0.02898	0.006421	0.00294	0.012	0.00650555	0.00253034	0.983	A
FatherMetal_Lifespan+AttainedAge	3	141589505	rs6440043	0.0001379	698000	0.02268	0.005799	0.002545	0.00031	0.00779171	0.00217549	0.573	A
FatherMetal_Lifespan+AttainedAge	3	142331360	rs6440096	5.807e-05	698000	0.007339	-0.009229	0.003442	0.00039	-0.0103762	0.0029312	0.804	A
FatherMetal_Lifespan+AttainedAge	3	142405348	rs11714087	0.000451	698000	0.002255	-0.01177	0.003852	0.015	-0.00796494	0.00326149	0.5011	A
FatherMetal_Lifespan+AttainedAge	3	142411287	rs9823492	0.001889	697000	0.001309	-0.01055	0.003284	0.092	-0.00476752	0.00282097	0.2184	A
FatherMetal_Lifespan+AttainedAge	3	142503605	rs7621642	2.491e-05	698000	0.0004837	-0.01087	0.003116	0.002	-0.00813862	0.00264387	0.559	G
FatherMetal_Lifespan+AttainedAge	3	142524858	rs7610200	0.000571	697000	0.00539	-0.009063	0.003257	0.0096	-0.00711026	0.00274916	0.6928	G
FatherMetal_Lifespan+AttainedAge	3	142541687	rs9841007	8.639e-05	698000	0.002523	-0.008946	0.002962	0.002	-0.00771942	0.00253366	0.7963	A
FatherMetal_Lifespan+AttainedAge	3	144806160	rs7632966	0.002386	697000	0.0005847	-0.01919	0.005581	0.17	-0.00658615	0.00475987	0.1161	A
FatherMetal_Lifespan+AttainedAge	3	146371033	rs4681329	0.001278	695000	0.1384	-0.003889	0.002624	0.00055	-0.00766965	0.00222973	0.3088	G
FatherMetal_Lifespan+AttainedAge	3	146394094	rs10935638	0.0008364	698000	0.02404	-0.006124	0.002714	0.0035	-0.00673503	0.00232268	0.8645	G
FatherMetal_Lifespan+AttainedAge	3	146429761	rs2174783	0.0002615	698000	0.04102	-0.005414	0.00265	0.00034	-0.00802912	0.00227112	0.4772	A
FatherMetal_Lifespan+AttainedAge	3	146504254	rs9834616	0.001571	684000	0.04393	0.00521	0.002586	0.0041	0.00622129	0.00218908	0.7853	G
FatherMetal_Lifespan+AttainedAge	3	146562424	rs2013690	0.001605	697000	0.01405	0.006284	0.002558	0.014	0.00532113	0.00219037	0.806	A
FatherMetal_Lifespan+AttainedAge	3	146570867	rs1978683	0.001837	697000	0.01068	0.006544	0.002564	0.021	0.0050427	0.00220254	0.6887	A
FatherMetal_Lifespan+AttainedAge	3	146837929	rs9814423	0.000385	697000	0.01347	-0.006299	0.002549	0.0024	-0.00657181	0.00217618	0.93	G
FatherMetal_Lifespan+AttainedAge	3	146920104	rs6780114	0.0008104	698000	0.02575	0.005842	0.00262	0.0031	0.00661286	0.00224478	0.8338	G
FatherMetal_Lifespan+AttainedAge	3	149532826	rs9875202	0.002493	697000	0.5395	-0.001732	0.002823	7.3e-05	-0.00973962	0.00243933	0.05376	G
FatherMetal_Lifespan+AttainedAge	3	150052807	rs16862610	0.001012	698000	0.0003987	-0.01528	0.004316	0.099	-0.00611619	0.00372348	0.1402	A
FatherMetal_Lifespan+AttainedAge	3	150115046	rs7620193	0.001489	696000	0.006422	-0.009457	0.00347	0.025	-0.00656316	0.00297141	0.5734	A
FatherMetal_Lifespan+AttainedAge	3	150173434	rs6767155	0.0008156	698000	0.001169	-0.01217	0.003747	0.044	-0.00638957	0.00322932	0.291	A
FatherMetal_Lifespan+AttainedAge	3	150237962	rs9865803	0.002149	698000	0.03229	-0.007514	0.00351	0.0088	-0.00789744	0.00305908	0.9421	G
FatherMetal_Lifespan+AttainedAge	3	153712602	rs883228	0.0003419	698000	0.003482	0.0076	0.002601	0.0077	0.00594315	0.00223165	0.6582	A
FatherMetal_Lifespan+AttainedAge	3	153761914	rs13080778	0.0009786	698000	0.00726	0.006978	0.002599	0.014	0.00547585	0.0022299	0.6886	G
FatherMetal_Lifespan+AttainedAge	3	153779868	rs17817774	0.0008923	698000	0.01781	0.008513	0.003592	0.0053	0.00845096	0.00300982	0.9895	A
FatherMetal_Lifespan+AttainedAge	3	153914902	rs386893	0.0008689	698000	0.03448	0.005403	0.002555	0.0024	0.00656796	0.00218704	0.7364	G
FatherMetal_Lifespan+AttainedAge	3	153927792	rs399118	0.0006892	688000	0.02083	0.006223	0.002693	0.0032	0.00663556	0.00227778	0.904	A
FatherMetal_Lifespan+AttainedAge	3	153930808	rs2122365	0.002243	698000	0.06098	0.006979	0.003725	0.0044	0.00885433	0.00308722	0.6946	C
FatherMetal_Lifespan+AttainedAge	3	156836517	rs2086667	0.0002738	698000	0.0005508	-0.01063	0.003078	0.024	-0.0061679	0.00268593	0.2919	G
FatherMetal_Lifespan+AttainedAge	3	156852205	rs12487629	0.0001617	698000	0.0009538	-0.009036	0.002735	0.0094	-0.00620971	0.0023867	0.4551	A
FatherMetal_Lifespan+AttainedAge	3	156861460	rs4680340	3.998e-05	698000	0.001179	-0.009371	0.002889	0.0016	-0.00790326	0.00249647	0.7075	A
FatherMetal_Lifespan+AttainedAge	3	156862145	rs6809394	6.563e-06	698000	0.000253	-0.009695	0.002649	0.00075	-0.00770816	0.00228386	0.5931	G
FatherMetal_Lifespan+AttainedAge	3	156919138	rs16827308	0.0001088	698000	0.001848	-0.008588	0.002758	0.0035	-0.00697047	0.00238168	0.6722	C
FatherMetal_Lifespan+AttainedAge	3	156967195	rs4680348	4.497e-05	698000	0.000962	-0.008664	0.002624	0.0022	-0.00691707	0.00226201	0.6374	A
FatherMetal_Lifespan+AttainedAge	3	157081324	rs11918974	0.001128	697000	0.003711	-0.008449	0.002912	0.028	-0.00555163	0.00251493	0.4774	A
FatherMetal_Lifespan+AttainedAge	3	157088982	rs9883103	0.000706	698000	0.001767	-0.008216	0.002627	0.029	-0.00498382	0.00228135	0.3842	G
FatherMetal_Lifespan+AttainedAge	3	157263695	rs749422	0.001836	698000	0.02453	-0.005824	0.00259	0.0096	-0.00579272	0.00221707	0.9831	G
FatherMetal_Lifespan+AttainedAge	3	161394052	rs4635724	0.001796	698000	0.1565	0.003606	0.002545	0.00075	0.00735683	0.0021834	0.3074	A
FatherMetal_Lifespan+AttainedAge	4	410015	rs6838825	0.001474	697000	0.00234	0.02049	0.006733	0.051	0.0112477	0.00581302	0.3399	G
FatherMetal_Lifespan+AttainedAge	4	744972	rs1531583	0.001562	698000	0.004812	-0.01845	0.006545	0.033	-0.011967	0.00564833	0.4915	C
FatherMetal_Lifespan+AttainedAge	4	1507198	rs12647020	0.001572	698000	0.0305	0.005659	0.002615	0.0062	0.00615062	0.00222697	0.8997	G
FatherMetal_Lifespan+AttainedAge	4	2481490	rs11248108	0.0008648	699000	0.01139	-0.008951	0.003537	0.008	-0.00790309	0.00304154	0.8587	G
FatherMetal_Lifespan+AttainedAge	4	2502637	rs1203863	0.0007222	698000	0.01878	-0.007787	0.003314	0.0038	-0.0080472	0.00284044	0.9278	A
FatherMetal_Lifespan+AttainedAge	4	2505091	rs1203860	0.0001442	698000	0.004016	-0.00868	0.003017	0.0024	-0.00766102	0.00259632	0.8481	C
FatherMetal_Lifespan+AttainedAge	4	2698230	rs16843217	9.318e-05	698000	0.002781	-0.01897	0.006343	0.002	-0.0164915	0.00535719	0.8126	G
FatherMetal_Lifespan+AttainedAge	4	2861430	rs1263360	0.0002862	695000	0.01536	0.006213	0.002563	0.0014	0.0068558	0.00218581	0.8359	A
FatherMetal_Lifespan+AttainedAge	4	2862190	rs10026792	8.217e-05	698000	0.001513	0.008906	0.002807	0.003	0.00694851	0.00239505	0.6629	G
FatherMetal_Lifespan+AttainedAge	4	2881256	rs624833	7.592e-05	698000	0.0009401	0.009143	0.002764	0.0041	0.0066308	0.00235876	0.5568	A
FatherMetal_Lifespan+AttainedAge	4	2882007	rs1242228	0.0002403	698000	0.057	0.00484	0.002543	0.00018	0.0080367	0.00219055	0.3648	G
FatherMetal_Lifespan+AttainedAge	4	2941988	rs2032463	0.002409	698000	0.00122	0.008348	0.002581	0.12	0.00334262	0.0022137	0.1875	A
FatherMetal_Lifespan+AttainedAge	4	2950717	rs2995797	0.0003687	698000	0.002516	0.008172	0.002705	0.011	0.00573167	0.00230854	0.5595	G
FatherMetal_Lifespan+AttainedAge	4	2990375	rs2051555	0.0008837	698000	0.005381	0.007425	0.002668	0.016	0.0053758	0.00227691	0.6179	G
FatherMetal_Lifespan+AttainedAge	4	3039150	rs1801058	0.0003624	698000	0.0105	0.006597	0.002578	0.0029	0.00642882	0.00219913	0.9963	G
FatherMetal_Lifespan+AttainedAge	4	3109442	rs10015979	0.002132	698000	0.001391	-0.00837	0.002618	0.1	-0.00353727	0.00223466	0.2155	A
FatherMetal_Lifespan+AttainedAge	4	3148276	rs6855981	0.0001701	698000	0.001668	0.008259	0.002627	0.0064	0.00604937	0.00225087	0.5762	G
FatherMetal_Lifespan+AttainedAge	4	3180021	rs363096	0.0001454	698000	0.001117	-0.008392	0.002575	0.0074	-0.00577614	0.0022022	0.5039	G
FatherMetal_Lifespan+AttainedAge	4	3215835	rs362331	0.001822	698000	0.01346	0.006348	0.002569	0.017	0.00511735	0.00220141	0.7681	A
FatherMetal_Lifespan+AttainedAge	4	3227419	rs362273	6.409e-05	698000	0.003837	0.007934	0.002744	0.00091	0.00766117	0.00234056	0.9733	A
FatherMetal_Lifespan+AttainedAge	4	3252852	rs3129322	0.00136	698000	0.01666	0.006313	0.002637	0.0097	0.00578359	0.00226426	0.9023	A
FatherMetal_Lifespan+AttainedAge	4	3263776	rs3095081	0.002006	698000	0.004846	0.007399	0.002626	0.043	0.0044046	0.00223474	0.4528	G
FatherMetal_Lifespan+AttainedAge	4	3267668	rs2798224	0.0001156	698000	0.0003697	-0.009144	0.002568	0.013	-0.00523211	0.00219956	0.3203	A
FatherMetal_Lifespan+AttainedAge	4	3270488	rs2798221	0.0007418	698000	0.0009753	-0.008539	0.002589	0.045	-0.00416312	0.00222082	0.2737	G
FatherMetal_Lifespan+AttainedAge	4	3284751	rs6446731	0.0001895	698000	0.00201	-0.008639	0.002797	0.0062	-0.00633996	0.00241403	0.6063	G
FatherMetal_Lifespan+AttainedAge	4	3298800	rs2051559	0.001793	698000	0.0001522	-0.01414	0.003734	0.24	-0.00357444	0.00321705	0.0538	A
FatherMetal_Lifespan+AttainedAge	4	3339038	rs7668784	6.43e-05	696000	0.0001331	-0.01157	0.003029	0.014	-0.00614805	0.00260594	0.2321	C
FatherMetal_Lifespan+AttainedAge	4	3346617	rs2749781	0.0001742	698000	0.004051	0.007451	0.002592	0.003	0.00649197	0.00221343	0.817	G
FatherMetal_Lifespan+AttainedAge	4	3369099	rs16844212	0.000256	698000	0.0004957	-0.01007	0.002892	0.024	-0.00535523	0.00249141	0.2827	G
FatherMetal_Lifespan+AttainedAge	4	3375722	rs6855619	5.315e-05	698000	0.0003728	-0.009768	0.002745	0.0057	-0.00628782	0.00234969	0.4098	G
FatherMetal_Lifespan+AttainedAge	4	5216885	rs11734549	0.001477	698000	3.214e-05	-0.01186	0.002852	0.36	-0.00236685	0.00247622	0.01939	G
FatherMetal_Lifespan+AttainedAge	4	13643437	rs16888892	0.002082	698000	0.0006048	-0.01417	0.004132	0.15	-0.00504525	0.00348417	0.128	G
FatherMetal_Lifespan+AttainedAge	4	17402150	rs10516312	0.001089	698000	0.006243	0.008614	0.00315	0.018	0.00638875	0.00271504	0.6242	G
FatherMetal_Lifespan+AttainedAge	4	19038807	rs207342	0.001852	698000	0.6099	0.001514	0.002968	2.7e-05	0.0105475	0.00253864	0.03235	G
FatherMetal_Lifespan+AttainedAge	4	20251117	rs614158	0.001926	698000	0.003264	-0.008183	0.002782	0.054	-0.00445903	0.00239544	0.3703	G
FatherMetal_Lifespan+AttainedAge	4	20262768	rs1323067	0.001794	698000	0.05133	-0.005149	0.002642	0.004	-0.00637651	0.00226276	0.7192	G
FatherMetal_Lifespan+AttainedAge	4	21735319	rs7697475	0.0006464	698000	0.004933	0.008058	0.002866	0.012	0.00615198	0.00247273	0.6479	A
FatherMetal_Lifespan+AttainedAge	4	21820620	rs10034770	9.093e-05	698000	0.005362	0.007296	0.00262	0.001	0.00730702	0.00224264	0.9806	C
FatherMetal_Lifespan+AttainedAge	4	21842795	rs957196	0.001007	698000	0.021	0.005976	0.002589	0.0052	0.00611627	0.0022108	0.9533	G
FatherMetal_Lifespan+AttainedAge	4	23366950	rs1876758	0.001619	698000	0.07437	-0.03179	0.01781	0.0021	-0.0562337	0.0184939	0.5548	G
FatherMetal_Lifespan+AttainedAge	4	25400468	rs10032586	0.001388	697000	0.3064	-0.005975	0.005842	0.00012	-0.0196738	0.00517804	0.1158	A
FatherMetal_Lifespan+AttainedAge	4	29203881	rs16881492	0.001915	698000	0.1058	-0.006511	0.004026	0.0016	-0.0111851	0.00349094	0.4517	A
FatherMetal_Lifespan+AttainedAge	4	29311144	rs1821685	0.001161	698000	0.259	-0.003	0.002658	0.00013	-0.00868555	0.00227234	0.1362	G
FatherMetal_Lifespan+AttainedAge	4	31016990	rs7696101	0.002328	698000	0.2007	-0.003695	0.002888	0.00072	-0.00822608	0.00248151	0.262	G
FatherMetal_Lifespan+AttainedAge	4	38367538	rs1487624	6.245e-05	698000	0.0006956	0.008631	0.002545	0.0042	0.0062446	0.00218533	0.5156	G
FatherMetal_Lifespan+AttainedAge	4	38374153	rs11732737	2.506e-05	698000	0.005695	0.007034	0.002544	0.00017	0.00831227	0.00220525	0.7508	G
FatherMetal_Lifespan+AttainedAge	4	38379565	rs12646716	4.146e-05	697000	0.0006752	-0.008898	0.002618	0.0027	-0.00672464	0.00223135	0.5626	A
FatherMetal_Lifespan+AttainedAge	4	38380708	rs7668402	0.0008508	698000	0.01881	-0.006537	0.002783	0.0047	-0.00674114	0.00237145	0.9597	G
FatherMetal_Lifespan+AttainedAge	4	38387075	rs2291433	0.001486	698000	0.09924	-0.004202	0.002549	0.0012	-0.00710061	0.00218056	0.4344	C
FatherMetal_Lifespan+AttainedAge	4	41063203	rs1472869	0.001635	698000	0.07512	-0.005189	0.002915	0.0021	-0.00764795	0.00248941	0.5527	G
FatherMetal_Lifespan+AttainedAge	4	46055478	rs993677	0.002298	698000	0.009485	-0.009843	0.003795	0.03	-0.00717708	0.00325144	0.6094	A
FatherMetal_Lifespan+AttainedAge	4	48467710	rs10024547	0.001083	698000	0.3285	-0.002971	0.003041	6.4e-05	-0.0102584	0.00258659	0.08954	G
FatherMetal_Lifespan+AttainedAge	4	48494546	rs9993088	1.321e-05	698000	0.06986	-0.005149	0.00284	1.2e-06	-0.011533	0.00238847	0.1036	C
FatherMetal_Lifespan+AttainedAge	4	48495615	rs7694862	2.316e-05	698000	0.1469	-0.003993	0.002753	5.6e-07	-0.0115892	0.00232271	0.04912	G
FatherMetal_Lifespan+AttainedAge	4	48498679	rs10029732	0.001905	698000	0.8843	-0.0003699	0.002543	6.1e-06	-0.00980435	0.00217606	0.00971	A
FatherMetal_Lifespan+AttainedAge	4	48851937	rs3761729	0.0006188	690000	0.8888	-0.0003613	0.002583	6.5e-07	-0.0108181	0.00217404	0.004586	G
FatherMetal_Lifespan+AttainedAge	4	48991540	rs936135	0.000661	698000	0.3259	-0.002705	0.002754	2.7e-05	-0.009682	0.00231581	0.07005	A
FatherMetal_Lifespan+AttainedAge	4	49061141	rs7655341	1.656e-05	697000	0.09523	-0.004858	0.002911	9e-07	-0.0119748	0.00244018	0.07883	A
FatherMetal_Lifespan+AttainedAge	4	49091782	rs7674086	0.0001486	697000	0.3039	-0.0029	0.002821	2.2e-06	-0.0112253	0.00237657	0.03617	A
FatherMetal_Lifespan+AttainedAge	4	52745959	rs10012938	0.0002461	693000	0.2233	-0.003794	0.003115	1.3e-05	-0.0112861	0.00258581	0.08362	G
FatherMetal_Lifespan+AttainedAge	4	52860156	rs1519588	7.987e-05	698000	0.2323	-0.00336	0.002813	1.5e-06	-0.0114412	0.00238077	0.04231	G
FatherMetal_Lifespan+AttainedAge	4	52923205	rs784943	2.339e-05	698000	0.0605	-0.005445	0.002901	4.1e-06	-0.0112713	0.00245294	0.151	A
FatherMetal_Lifespan+AttainedAge	4	53795651	rs301126	0.001503	698000	0.0009977	-0.01178	0.003578	0.087	-0.00507899	0.00296365	0.2059	A
FatherMetal_Lifespan+AttainedAge	4	61231636	rs17081849	0.002335	698000	0.09097	0.008499	0.005028	0.0027	0.0135288	0.0044436	0.5414	A
FatherMetal_Lifespan+AttainedAge	4	62637158	rs2345049	0.001428	699000	0.0676	0.004677	0.002559	0.002	0.00679004	0.0022023	0.5691	G
FatherMetal_Lifespan+AttainedAge	4	62665721	rs4493573	0.00131	698000	0.06934	0.004662	0.002567	0.0017	0.00684857	0.00220031	0.5447	G
FatherMetal_Lifespan+AttainedAge	4	67741837	rs17799404	0.0003051	698000	0.01876	0.005964	0.002537	0.0012	0.00719346	0.00218905	0.7683	A
FatherMetal_Lifespan+AttainedAge	4	67763820	rs1481245	0.0001413	698000	0.01618	-0.006164	0.002563	0.0005	-0.00780346	0.0022058	0.6883	A
FatherMetal_Lifespan+AttainedAge	4	67802992	rs923994	0.0004768	698000	0.03821	-0.006344	0.003061	0.0009	-0.00889077	0.00264504	0.592	G
FatherMetal_Lifespan+AttainedAge	4	67807854	rs11947612	2.456e-06	698000	0.0004686	-0.009212	0.002633	0.00013	-0.00891353	0.0022786	0.8794	A
FatherMetal_Lifespan+AttainedAge	4	67813017	rs2164300	1.978e-05	698000	0.001044	-0.008323	0.002539	0.00077	-0.00747277	0.00218495	0.7841	A
FatherMetal_Lifespan+AttainedAge	4	67872428	rs987811	8.952e-05	698000	0.001991	-0.01334	0.004314	0.0026	-0.0115302	0.00377575	0.7238	A
FatherMetal_Lifespan+AttainedAge	4	67899235	rs12506221	2.449e-05	697000	0.0005016	-0.008914	0.002562	0.0019	-0.00698002	0.00220719	0.5682	C
FatherMetal_Lifespan+AttainedAge	4	67939089	rs1425664	0.0004472	696000	0.004982	-0.007318	0.002606	0.0077	-0.00599711	0.00222229	0.7108	A
FatherMetal_Lifespan+AttainedAge	4	68007509	rs11131679	9.85e-05	698000	0.002836	-0.01003	0.003361	0.0021	-0.00923827	0.00292645	0.8084	A
FatherMetal_Lifespan+AttainedAge	4	68019294	rs933830	0.0004686	697000	0.005642	-0.008268	0.002987	0.0073	-0.00723165	0.00258117	0.7434	A
FatherMetal_Lifespan+AttainedAge	4	68024153	rs730934	0.0006211	696000	0.0008774	-0.008493	0.002553	0.04	-0.0046037	0.00218175	0.2742	A
FatherMetal_Lifespan+AttainedAge	4	68038559	rs7669686	0.00146	698000	0.006277	-0.007148	0.002616	0.025	-0.00505308	0.00224935	0.5738	G
FatherMetal_Lifespan+AttainedAge	4	68039482	rs28534578	0.0002167	698000	0.01108	-0.009272	0.00365	0.0014	-0.0105079	0.00321143	0.8905	A
FatherMetal_Lifespan+AttainedAge	4	76489345	rs2306175	0.001911	698000	0.007636	0.008019	0.003006	0.029	0.00548106	0.00254612	0.5812	G
FatherMetal_Lifespan+AttainedAge	4	80793114	rs11735728	0.00193	698000	0.2306	-0.003451	0.002879	0.0004	-0.00888777	0.00248751	0.2038	A
FatherMetal_Lifespan+AttainedAge	4	80906131	rs4444771	0.001575	697000	0.8412	-0.0005812	0.002901	5.3e-06	-0.0113692	0.0024736	0.01038	A
FatherMetal_Lifespan+AttainedAge	4	81158221	rs17004846	1.011e-05	698000	0.0001146	-0.01023	0.002651	0.0023	-0.00696739	0.0022659	0.3875	A
FatherMetal_Lifespan+AttainedAge	4	81927206	rs4458448	0.001753	698000	0.2054	-0.005138	0.004058	0.00043	-0.0125827	0.00356139	0.2247	G
FatherMetal_Lifespan+AttainedAge	4	81947080	rs1353386	0.000133	698000	0.1559	-0.004975	0.003505	1e-05	-0.0136095	0.00305116	0.1008	C
FatherMetal_Lifespan+AttainedAge	4	85260621	rs882109	0.000206	697000	0.001091	-0.01336	0.004092	0.011	-0.00880563	0.00354182	0.448	A
FatherMetal_Lifespan+AttainedAge	4	86482468	rs964837	0.001905	698000	0.00831	-0.007155	0.002711	0.027	-0.00521081	0.002322	0.6062	G
FatherMetal_Lifespan+AttainedAge	4	88765516	rs13127257	0.0001587	698000	0.0155	0.007718	0.003188	0.00062	0.00930942	0.002742	0.7233	A
FatherMetal_Lifespan+AttainedAge	4	88774073	rs1471399	0.001427	698000	0.02193	0.006163	0.00269	0.0078	0.00603871	0.00229967	0.9934	G
FatherMetal_Lifespan+AttainedAge	4	88788036	rs1463091	0.001172	698000	0.01857	0.006063	0.002576	0.0072	0.00589878	0.00221218	0.9711	A
FatherMetal_Lifespan+AttainedAge	4	88859131	rs11723364	4.652e-05	698000	0.008855	0.008091	0.003091	0.00023	0.00977259	0.00267192	0.7082	C
FatherMetal_Lifespan+AttainedAge	4	88949175	rs2467052	0.001382	697000	0.05734	-0.004878	0.002567	0.0024	-0.00666226	0.00219377	0.6302	C
FatherMetal_Lifespan+AttainedAge	4	88973006	rs2728104	0.002406	698000	0.02213	-0.009307	0.004067	0.015	-0.00835611	0.00345573	0.8873	A
FatherMetal_Lifespan+AttainedAge	4	88987916	rs4336187	0.0001562	697000	0.001475	-0.01155	0.003632	0.0064	-0.00850861	0.00315632	0.5556	A
FatherMetal_Lifespan+AttainedAge	4	89015857	rs2231164	0.001066	698000	0.0229	-0.00845	0.003714	0.0051	-0.0090287	0.00321539	0.9313	A
FatherMetal_Lifespan+AttainedAge	4	89441779	rs2717533	0.00126	698000	0.027	0.009714	0.004393	0.0053	0.0101978	0.00366516	0.9025	G
FatherMetal_Lifespan+AttainedAge	4	98206435	rs11097557	0.001712	698000	0.01655	0.006795	0.002835	0.013	0.00618032	0.00245995	0.8519	A
FatherMetal_Lifespan+AttainedAge	4	99463989	rs1919211	0.000796	698000	0.002604	-0.008126	0.002699	0.025	-0.00511356	0.00231541	0.4497	A
FatherMetal_Lifespan+AttainedAge	4	99918661	rs10035037	0.001808	698000	0.004588	-0.007376	0.002602	0.04	-0.00459294	0.00223783	0.4561	C
FatherMetal_Lifespan+AttainedAge	4	99988659	rs1230154	0.001202	684000	0.08795	-0.004992	0.002925	0.0011	-0.00794307	0.00241392	0.4733	A
FatherMetal_Lifespan+AttainedAge	4	99989259	rs1230155	0.001433	698000	0.02544	-0.006032	0.002699	0.0067	-0.00630925	0.00232022	0.9507	A
FatherMetal_Lifespan+AttainedAge	4	100054827	rs6532798	0.0004145	698000	0.01321	-0.006817	0.002751	0.0027	-0.00715126	0.00236607	0.9502	A
FatherMetal_Lifespan+AttainedAge	4	100055862	rs4148887	0.001759	697000	0.4455	0.002897	0.003797	6.8e-05	0.01323	0.00329917	0.06659	A
FatherMetal_Lifespan+AttainedAge	4	100058884	rs6532800	0.001807	698000	0.02996	-0.01686	0.007765	0.0076	-0.0177666	0.00672379	0.9351	G
FatherMetal_Lifespan+AttainedAge	4	100065509	rs1800759	0.0005673	698000	0.02378	-0.00588	0.002601	0.0021	-0.00698539	0.00223997	0.7946	C
FatherMetal_Lifespan+AttainedAge	4	100066084	rs3762894	0.00247	698000	0.3612	0.003148	0.003448	0.00022	0.0111726	0.00297431	0.1183	A
FatherMetal_Lifespan+AttainedAge	4	100257432	rs3114046	0.002028	697000	0.01292	0.01227	0.004937	0.02	0.0100256	0.00423645	0.7303	G
FatherMetal_Lifespan+AttainedAge	4	100263584	rs904096	0.001257	694000	0.04748	-0.005191	0.002619	0.0027	-0.00663405	0.00220117	0.6914	A
FatherMetal_Lifespan+AttainedAge	4	100304545	rs1372680	0.0006032	698000	0.009346	-0.01081	0.004158	0.0062	-0.00967815	0.00353695	0.8608	C
FatherMetal_Lifespan+AttainedAge	4	100305393	rs10516440	5.622e-05	698000	0.02526	-0.008644	0.003863	7.2e-05	-0.013002	0.00328127	0.4192	A
FatherMetal_Lifespan+AttainedAge	4	100444684	rs13126513	0.002055	698000	0.0469	-0.005067	0.00255	0.0054	-0.00595338	0.00218149	0.7831	G
FatherMetal_Lifespan+AttainedAge	4	100532637	rs745075	0.0007707	698000	0.1145	0.006078	0.003852	0.00034	0.0118512	0.00334526	0.3008	A
FatherMetal_Lifespan+AttainedAge	4	101945139	rs6826912	0.0006913	698000	0.0533	-0.01139	0.005895	0.00097	-0.0173751	0.00528547	0.5354	A
FatherMetal_Lifespan+AttainedAge	4	101996812	rs17030739	0.0001888	698000	0.02151	-0.008417	0.003662	0.00052	-0.0109453	0.0031685	0.641	G
FatherMetal_Lifespan+AttainedAge	4	102021290	rs17030753	0.002443	698000	0.2092	-0.005036	0.00401	0.00072	-0.0117588	0.00350068	0.2552	A
FatherMetal_Lifespan+AttainedAge	4	103478703	rs13117745	0.001822	698000	0.07224	0.006312	0.003511	0.0026	0.00908882	0.00303061	0.587	G
FatherMetal_Lifespan+AttainedAge	4	105061306	rs13108980	0.001624	698000	0.1248	0.003969	0.002586	0.00095	0.00741738	0.00221196	0.3691	G
FatherMetal_Lifespan+AttainedAge	4	105238884	rs11097857	0.002148	698000	0.09915	0.004295	0.002605	0.0021	0.00694983	0.00223405	0.494	G
FatherMetal_Lifespan+AttainedAge	4	105239875	rs17268078	6.202e-05	698000	0.02235	0.005821	0.002548	0.0001	0.00857907	0.00217464	0.4681	G
FatherMetal_Lifespan+AttainedAge	4	105890017	rs1490586	0.001704	698000	0.2084	-0.003702	0.002943	0.0004	-0.00917254	0.00258049	0.2189	C
FatherMetal_Lifespan+AttainedAge	4	105890515	rs2291507	0.001057	698000	0.03902	-0.00647	0.003135	0.0027	-0.00828766	0.00275124	0.725	G
FatherMetal_Lifespan+AttainedAge	4	105897524	rs7688673	0.001595	698000	0.003674	0.0102	0.00351	0.041	0.00611244	0.00301451	0.4241	G
FatherMetal_Lifespan+AttainedAge	4	105925099	rs1873361	0.0003045	698000	0.00016	0.01056	0.002796	0.055	0.00457703	0.00240888	0.1398	A
FatherMetal_Lifespan+AttainedAge	4	105936370	rs13151168	0.0006874	698000	0.001401	0.01076	0.003368	0.033	0.00599445	0.00288261	0.343	A
FatherMetal_Lifespan+AttainedAge	4	105945776	rs1490589	0.0004402	698000	0.0001686	0.01021	0.002713	0.074	0.00407918	0.00231303	0.1219	G
FatherMetal_Lifespan+AttainedAge	4	105986597	rs195149	0.0001806	698000	7.087e-05	0.01011	0.002545	0.053	0.00425614	0.00218924	0.1086	G
FatherMetal_Lifespan+AttainedAge	4	106034478	rs4698931	0.001314	698000	0.01079	0.006498	0.002549	0.014	0.00541535	0.00217752	0.7579	G
FatherMetal_Lifespan+AttainedAge	4	106052258	rs7654667	0.001919	698000	0.006501	-0.01034	0.003799	0.033	-0.00708608	0.00326553	0.5357	G
FatherMetal_Lifespan+AttainedAge	4	108838908	rs4428357	0.002396	698000	0.1556	-0.01096	0.007719	0.0012	-0.0206027	0.00651058	0.3473	A
FatherMetal_Lifespan+AttainedAge	4	113370913	rs231259	0.001497	698000	0.07358	-0.005447	0.003044	0.0019	-0.00794693	0.00258102	0.5451	A
FatherMetal_Lifespan+AttainedAge	4	113406671	rs17044746	0.002424	698000	0.01961	-0.005938	0.002544	0.017	-0.00518004	0.00217236	0.841	A
FatherMetal_Lifespan+AttainedAge	4	121183954	rs1355112	0.0007171	698000	0.05415	-0.004965	0.002578	0.001	-0.00732185	0.00221545	0.535	A
FatherMetal_Lifespan+AttainedAge	4	124437413	rs17007028	0.002135	698000	0.01468	-0.01031	0.004227	0.019	-0.00831847	0.00363267	0.7644	G
FatherMetal_Lifespan+AttainedAge	4	124608621	rs2589845	0.000998	698000	0.003112	0.009093	0.003075	0.028	0.00580272	0.00261246	0.4567	G
FatherMetal_Lifespan+AttainedAge	4	124623291	rs12500929	0.002422	699000	0.002154	0.009096	0.002965	0.088	0.00425697	0.00252561	0.2658	A
FatherMetal_Lifespan+AttainedAge	4	137454023	rs4315856	0.0004019	696000	0.0038	-0.007672	0.002651	0.0086	-0.00609321	0.00228357	0.652	G
FatherMetal_Lifespan+AttainedAge	4	140517700	rs706333	0.001787	698000	0.2518	-0.002933	0.00256	0.00029	-0.00796221	0.00221799	0.1741	G
FatherMetal_Lifespan+AttainedAge	4	148486299	rs17613180	0.001346	698000	0.2642	-0.0029	0.002597	0.00016	-0.00839843	0.00223639	0.1419	G
FatherMetal_Lifespan+AttainedAge	4	149447366	rs875758	0.001174	697000	0.01337	0.006321	0.002555	0.01	0.00564585	0.00218128	0.8517	G
FatherMetal_Lifespan+AttainedAge	4	149507299	rs13118340	0.001376	697000	0.03153	0.005788	0.002691	0.005	0.00644373	0.00228032	0.8615	A
FatherMetal_Lifespan+AttainedAge	4	156399607	rs7442312	0.001165	698000	1.498e-05	-0.01104	0.002549	0.39	-0.00199625	0.00218157	0.01276	A
FatherMetal_Lifespan+AttainedAge	4	156417909	rs6837085	0.0007302	698000	7.458e-06	0.0114	0.002544	0.36	0.00207299	0.00217975	0.01041	A
FatherMetal_Lifespan+AttainedAge	4	156675369	rs6838946	0.000286	698000	2.731e-05	-0.0144	0.003433	0.12	-0.00473055	0.0029524	0.04718	G
FatherMetal_Lifespan+AttainedAge	4	157642163	rs1469245	0.002167	698000	0.07638	0.00475	0.00268	0.0031	0.00688113	0.00230279	0.5972	G
FatherMetal_Lifespan+AttainedAge	4	157694651	rs4691377	6.71e-05	698000	0.02262	0.008261	0.003624	0.00011	0.0120362	0.00310425	0.4733	G
FatherMetal_Lifespan+AttainedAge	4	157715062	rs17035257	0.0005539	696000	0.05463	0.006683	0.003477	0.00068	0.0100501	0.00295426	0.4967	A
FatherMetal_Lifespan+AttainedAge	4	158064484	rs3775721	0.00194	698000	0.1689	0.003771	0.002741	0.00074	0.00785853	0.00233729	0.2935	A
FatherMetal_Lifespan+AttainedAge	4	159185633	rs1879658	0.001159	698000	0.2356	-0.007905	0.006665	0.00016	-0.0225524	0.00599776	0.1553	G
FatherMetal_Lifespan+AttainedAge	5	3128216	rs314011	0.001889	698000	0.08181	0.02329	0.01338	0.0023	0.0393078	0.0128992	0.5453	G
FatherMetal_Lifespan+AttainedAge	5	3209668	rs1215667	0.001071	698000	0.07177	0.005017	0.002786	0.0012	0.00784744	0.00240913	0.4989	G
FatherMetal_Lifespan+AttainedAge	5	4053766	rs1201368	0.00248	696000	0.0009332	0.008452	0.002554	0.14	0.00319939	0.00217545	0.1545	G
FatherMetal_Lifespan+AttainedAge	5	5153911	rs16874878	0.0022	697000	0.004894	0.009424	0.003349	0.047	0.00576167	0.00285597	0.4395	G
FatherMetal_Lifespan+AttainedAge	5	6680115	rs274657	0.001366	650000	0.1366	0.006824	0.004585	0.00076	0.0122517	0.00362103	0.4038	A
FatherMetal_Lifespan+AttainedAge	5	9598383	rs6897403	0.0007239	694000	0.02723	-0.009316	0.004219	0.0025	-0.0107483	0.00357394	0.7995	A
FatherMetal_Lifespan+AttainedAge	5	11333739	rs32139	0.001064	698000	0.00647	-0.006956	0.002555	0.017	-0.00522984	0.00220443	0.6379	A
FatherMetal_Lifespan+AttainedAge	5	12468013	rs32248	0.00225	698000	0.0235	-0.005821	0.00257	0.013	-0.0055044	0.00220267	0.9247	C
FatherMetal_Lifespan+AttainedAge	5	12532357	rs32358	0.0009024	694000	0.05181	0.004997	0.002569	0.0015	0.00696546	0.00218728	0.5981	A
FatherMetal_Lifespan+AttainedAge	5	12597678	rs12187460	0.002263	696000	0.01909	-0.006077	0.002593	0.016	-0.0054318	0.00221157	0.8421	A
FatherMetal_Lifespan+AttainedAge	5	12599348	rs7449177	0.0007693	698000	0.02727	-0.005645	0.002557	0.0027	-0.00665467	0.0021921	0.8015	A
FatherMetal_Lifespan+AttainedAge	5	12642449	rs7733480	0.0003731	697000	0.007206	0.006949	0.002586	0.0044	0.00627748	0.00221901	0.8625	A
FatherMetal_Lifespan+AttainedAge	5	32243327	rs7734652	0.001843	698000	0.2221	0.003112	0.002549	0.0004	0.00781072	0.00218837	0.2092	G
FatherMetal_Lifespan+AttainedAge	5	32781196	rs751432	0.0007392	697000	0.0008113	-0.01033	0.003085	0.05	-0.00508156	0.00261286	0.2463	A
FatherMetal_Lifespan+AttainedAge	5	32788184	rs1147225	0.0002906	698000	0.004279	-0.007339	0.002569	0.0053	-0.00615987	0.00219614	0.7463	G
FatherMetal_Lifespan+AttainedAge	5	32789852	rs1173756	0.000102	698000	0.003685	0.007404	0.002549	0.0017	0.00687389	0.00217586	0.8821	G
FatherMetal_Lifespan+AttainedAge	5	32810791	rs10521001	0.0007867	698000	0.001515	-0.009569	0.003017	0.036	-0.00532703	0.00255746	0.3408	G
FatherMetal_Lifespan+AttainedAge	5	32831670	rs13154066	0.0002749	698000	0.01558	0.00626	0.002588	0.0013	0.00717714	0.00221619	0.8146	G
FatherMetal_Lifespan+AttainedAge	5	33370654	rs268711	0.002397	698000	0.0004136	-0.01297	0.003673	0.2	-0.0040236	0.0031609	0.09175	G
FatherMetal_Lifespan+AttainedAge	5	33494870	rs2331238	0.002034	697000	0.009095	0.006939	0.00266	0.027	0.00528188	0.00236916	0.6191	A
FatherMetal_Lifespan+AttainedAge	5	33558544	rs194381	0.0009622	698000	2.946e-05	0.01078	0.002579	0.28	0.00244567	0.00220578	0.02422	A
FatherMetal_Lifespan+AttainedAge	5	33565137	rs4146150	0.001195	698000	0.004474	-0.007278	0.00256	0.026	-0.00493358	0.00219986	0.517	A
FatherMetal_Lifespan+AttainedAge	5	43191033	rs7730004	5.323e-05	698000	0.04728	0.005393	0.002718	2.4e-05	0.00996395	0.0023271	0.2564	A
FatherMetal_Lifespan+AttainedAge	5	51963919	rs7715220	0.002192	698000	0.04107	-0.005968	0.002921	0.0069	-0.00674731	0.00250247	0.8504	C
FatherMetal_Lifespan+AttainedAge	5	55861359	rs13173241	0.0021	697000	0.07579	-0.005626	0.003168	0.003	-0.00800091	0.00268516	0.5965	G
FatherMetal_Lifespan+AttainedAge	5	55868097	rs13179413	0.001913	685000	0.05597	-0.005624	0.002943	0.004	-0.00704996	0.00245128	0.7264	G
FatherMetal_Lifespan+AttainedAge	5	56286209	rs4309923	0.0004787	698000	0.1327	0.003898	0.002593	0.00012	0.00843345	0.00221204	0.2138	G
FatherMetal_Lifespan+AttainedAge	5	57079334	rs17746790	0.001637	698000	0.003134	-0.01101	0.003728	0.047	-0.00645888	0.00325253	0.3857	G
FatherMetal_Lifespan+AttainedAge	5	57180012	rs35310736	0.001713	698000	0.07637	0.006707	0.003785	0.0022	0.00993365	0.00325471	0.5556	G
FatherMetal_Lifespan+AttainedAge	5	57913379	rs2279980	0.001176	698000	0.5968	0.001691	0.003195	1.2e-05	0.0121405	0.00276672	0.02548	A
FatherMetal_Lifespan+AttainedAge	5	61199286	rs1445880	0.00211	693000	0.04712	0.005625	0.002833	0.0056	0.00667995	0.00241412	0.7979	A
FatherMetal_Lifespan+AttainedAge	5	61242239	rs6449570	0.0003315	698000	0.04584	-0.00533	0.002669	0.00041	-0.00805065	0.00226933	0.4756	C
FatherMetal_Lifespan+AttainedAge	5	62604244	rs346435	0.0008979	698000	0.169	-0.003534	0.002569	0.00021	-0.00824775	0.00219561	0.212	A
FatherMetal_Lifespan+AttainedAge	5	62701346	rs7444397	0.0001529	698000	0.07067	0.004627	0.00256	6.2e-05	0.00887181	0.00219602	0.26	G
FatherMetal_Lifespan+AttainedAge	5	62702322	rs4605741	0.0003589	697000	0.09979	-0.004219	0.002563	0.00013	-0.00845973	0.00218931	0.2591	A
FatherMetal_Lifespan+AttainedAge	5	62739123	rs12522826	0.0002944	698000	0.02092	-0.006311	0.002733	0.001	-0.00760674	0.00232211	0.7236	C
FatherMetal_Lifespan+AttainedAge	5	62820508	rs669245	0.001793	698000	0.01095	-0.006568	0.002582	0.02	-0.00515284	0.00220508	0.7024	G
FatherMetal_Lifespan+AttainedAge	5	62842815	rs653244	0.0008642	698000	0.05174	0.005509	0.002832	0.0014	0.00782588	0.00243021	0.5833	A
FatherMetal_Lifespan+AttainedAge	5	62855619	rs16891970	0.0002661	698000	0.06283	0.008933	0.004801	0.00018	0.0156613	0.00411067	0.35	C
FatherMetal_Lifespan+AttainedAge	5	62867025	rs722851	0.002264	698000	0.4048	0.003323	0.003989	0.00014	0.013283	0.00341626	0.09206	G
FatherMetal_Lifespan+AttainedAge	5	62886869	rs11959809	0.00119	698000	0.0261	-0.006095	0.00274	0.0051	-0.00652587	0.00233345	0.9031	A
FatherMetal_Lifespan+AttainedAge	5	66050568	rs258275	0.0009719	698000	0.06909	0.007201	0.003961	0.0011	0.0110818	0.00343098	0.4975	A
FatherMetal_Lifespan+AttainedAge	5	66089535	rs6887024	0.00154	698000	0.04712	-0.005233	0.002636	0.0036	-0.00648674	0.00226155	0.7238	G
FatherMetal_Lifespan+AttainedAge	5	66129815	rs9918275	0.001569	698000	0.06354	-0.004963	0.002675	0.0025	-0.00680566	0.0022854	0.6106	A
FatherMetal_Lifespan+AttainedAge	5	82058500	rs2113027	0.0007178	697000	0.001558	0.01117	0.003529	0.032	0.00642757	0.00302874	0.3557	G
FatherMetal_Lifespan+AttainedAge	5	82120504	rs16899961	0.002393	698000	0.0001339	0.01398	0.00366	0.31	0.00317214	0.0032161	0.04096	G
FatherMetal_Lifespan+AttainedAge	5	88001798	rs2161228	0.002165	698000	0.1067	-0.006457	0.004003	0.0019	-0.0112323	0.00362309	0.4674	G
FatherMetal_Lifespan+AttainedAge	5	91635387	rs7445553	0.002478	698000	0.05546	0.01658	0.008659	0.0057	0.020831	0.00745204	0.7532	G
FatherMetal_Lifespan+AttainedAge	5	92388210	rs1845840	0.00155	694000	0.01728	0.006385	0.002682	0.011	0.0058925	0.00226744	0.8802	A
FatherMetal_Lifespan+AttainedAge	5	94202167	rs27003	0.0004091	698000	0.0002621	0.0101	0.002767	0.055	0.0045503	0.00236972	0.1645	G
FatherMetal_Lifespan+AttainedAge	5	94222598	rs39988	0.002149	696000	0.007917	-0.007468	0.002812	0.032	-0.00515949	0.0024162	0.5665	A
FatherMetal_Lifespan+AttainedAge	5	97555290	rs9314227	0.0006081	697000	0.004523	0.009279	0.003268	0.012	0.00720477	0.00283496	0.6313	A
FatherMetal_Lifespan+AttainedAge	5	98967037	rs3850902	0.001758	695000	0.01001	0.006605	0.002565	0.021	0.00516163	0.00218778	0.672	A
FatherMetal_Lifespan+AttainedAge	5	102921968	rs6874368	0.002433	698000	0.1443	0.003838	0.002628	0.0014	0.00726387	0.00225058	0.3759	A
FatherMetal_Lifespan+AttainedAge	5	102926108	rs11242497	0.001167	698000	0.0462	0.0055	0.002759	0.0025	0.00708311	0.00234149	0.6787	G
FatherMetal_Lifespan+AttainedAge	5	108855067	rs11747777	0.001843	698000	0.1109	0.006248	0.003919	0.0014	0.0108947	0.00341103	0.4281	G
FatherMetal_Lifespan+AttainedAge	5	109023410	rs845734	0.0005243	698000	0.001788	0.008508	0.002724	0.021	0.00534947	0.00234637	0.4271	C
FatherMetal_Lifespan+AttainedAge	5	109112145	rs4569915	0.0007085	698000	0.005086	0.007575	0.002704	0.013	0.00571678	0.00232989	0.6402	A
FatherMetal_Lifespan+AttainedAge	5	109143602	rs2301016	0.002235	698000	0.09705	0.004784	0.002883	0.0023	0.00764864	0.00250684	0.5086	G
FatherMetal_Lifespan+AttainedAge	5	111454041	rs6876779	0.001478	698000	0.08173	0.00566	0.003251	0.0016	0.00896007	0.00285423	0.5038	G
FatherMetal_Lifespan+AttainedAge	5	119372015	rs13186435	0.002354	698000	0.04884	-0.005057	0.002567	0.0062	-0.00597875	0.00220149	0.7944	A
FatherMetal_Lifespan+AttainedAge	5	121214164	rs13182775	0.0008857	696000	0.1021	-0.008152	0.004986	0.00052	-0.0151905	0.00436315	0.3559	A
FatherMetal_Lifespan+AttainedAge	5	121302074	rs2399731	0.0007722	698000	0.0302	-0.01324	0.006108	0.0024	-0.0158063	0.00516846	0.7637	G
FatherMetal_Lifespan+AttainedAge	5	121314168	rs2914610	0.001525	698000	0.001422	-0.01047	0.003283	0.072	-0.00500958	0.00280423	0.2529	G
FatherMetal_Lifespan+AttainedAge	5	121402597	rs10053942	0.001829	698000	0.01352	-0.008108	0.003283	0.017	-0.00667303	0.00280685	0.7687	G
FatherMetal_Lifespan+AttainedAge	5	123744036	rs12518621	0.00133	698000	0.006452	0.00794	0.002915	0.022	0.00570344	0.00249301	0.5976	C
FatherMetal_Lifespan+AttainedAge	5	123778418	rs594434	0.001781	698000	9.967e-05	0.01087	0.002794	0.28	0.0026182	0.00242676	0.03985	G
FatherMetal_Lifespan+AttainedAge	5	123782602	rs1199746	0.001263	698000	0.0005734	0.009866	0.002865	0.1	0.00407858	0.00250188	0.1586	A
FatherMetal_Lifespan+AttainedAge	5	128400356	rs42563	0.001208	696000	0.002672	-0.008213	0.002735	0.038	-0.00477978	0.00233953	0.3927	G
FatherMetal_Lifespan+AttainedAge	5	131540884	rs156025	0.0006746	698000	0.04209	-0.006311	0.003105	0.0013	-0.00865168	0.0026698	0.6173	G
FatherMetal_Lifespan+AttainedAge	5	131541833	rs75189	0.001209	698000	0.001728	-0.008285	0.002644	0.051	-0.00452794	0.00227443	0.3114	G
FatherMetal_Lifespan+AttainedAge	5	131717050	rs17622208	0.001228	698000	0.05205	0.004952	0.002549	0.0023	0.00668418	0.0021745	0.6427	G
FatherMetal_Lifespan+AttainedAge	5	131797578	rs2522051	0.001127	698000	0.002727	-0.007637	0.002548	0.035	-0.00464644	0.00218371	0.4091	A
FatherMetal_Lifespan+AttainedAge	5	131801158	rs10077785	0.00139	698000	0.02262	-0.006906	0.003029	0.0073	-0.00695228	0.00255815	0.9892	G
FatherMetal_Lifespan+AttainedAge	5	131808869	rs2548993	0.0007272	698000	0.0264	-0.006363	0.002866	0.0026	-0.00739933	0.00243593	0.8036	A
FatherMetal_Lifespan+AttainedAge	5	131820997	rs17622656	0.002454	698000	0.1036	0.004282	0.002631	0.0024	0.00678574	0.00222829	0.4995	G
FatherMetal_Lifespan+AttainedAge	5	148846557	rs386763	0.0008887	697000	0.003847	-0.007426	0.002569	0.021	-0.00504654	0.00220245	0.5251	C
FatherMetal_Lifespan+AttainedAge	5	148892095	rs1947582	0.002443	698000	0.004711	0.007196	0.002546	0.054	0.00410758	0.00217752	0.4154	G
FatherMetal_Lifespan+AttainedAge	5	151888663	rs7725174	0.002145	698000	0.06912	-0.006378	0.003509	0.0035	-0.00873879	0.00300647	0.6353	C
FatherMetal_Lifespan+AttainedAge	5	153734582	rs27152	0.001879	698000	0.0001107	-0.01034	0.002674	0.28	-0.00242016	0.00232967	0.0416	A
FatherMetal_Lifespan+AttainedAge	5	156567422	rs17054271	0.0004845	698000	0.006484	-0.03879	0.01425	0.0067	-0.034035	0.0125152	0.7827	G
FatherMetal_Lifespan+AttainedAge	5	156625279	rs31223	0.0006427	698000	0.3389	0.002493	0.002607	2.3e-05	0.00954647	0.00225986	0.06405	A
FatherMetal_Lifespan+AttainedAge	5	156809050	rs889034	0.001126	698000	0.03161	-0.005993	0.002788	0.0038	-0.00683643	0.00236773	0.8185	A
FatherMetal_Lifespan+AttainedAge	5	156849722	rs1833736	0.0009044	695000	0.03875	-0.005326	0.002577	0.0022	-0.00659133	0.00219703	0.7051	A
FatherMetal_Lifespan+AttainedAge	5	156891353	rs4704742	5.003e-05	698000	0.004486	0.007231	0.002544	0.00056	0.00741146	0.00217942	0.9359	A
FatherMetal_Lifespan+AttainedAge	5	156901615	rs11749762	0.0008491	698000	0.05079	0.009964	0.005101	0.0014	0.0141339	0.00444077	0.587	A
FatherMetal_Lifespan+AttainedAge	5	156917340	rs10067096	0.0001775	698000	0.001558	0.009988	0.003157	0.0071	0.00715763	0.00271668	0.553	A
FatherMetal_Lifespan+AttainedAge	5	157317932	rs11738052	0.0003038	695000	0.007911	0.01203	0.004529	0.0031	0.011338	0.00388585	0.9261	A
FatherMetal_Lifespan+AttainedAge	5	157478630	rs1957562	0.002252	698000	0.04705	-0.005686	0.002863	0.0061	-0.00667589	0.00245144	0.801	G
FatherMetal_Lifespan+AttainedAge	5	157521341	rs1744345	0.0002775	698000	0.1327	-0.004278	0.002845	4.9e-05	-0.0100465	0.00246113	0.1708	G
FatherMetal_Lifespan+AttainedAge	5	157525853	rs7716011	0.001351	697000	0.09588	-0.004882	0.002932	0.0011	-0.00818247	0.0025021	0.4346	A
FatherMetal_Lifespan+AttainedAge	5	158393842	rs12109219	0.0003132	698000	0.03877	0.005869	0.00284	0.00048	0.00845189	0.00241781	0.5209	A
FatherMetal_Lifespan+AttainedAge	5	162374256	rs1993557	0.001727	698000	1.901e-05	-0.01099	0.002571	0.46	-0.00165436	0.00220788	0.01152	A
FatherMetal_Lifespan+AttainedAge	5	165151524	rs263894	0.001795	698000	0.002933	-0.007569	0.002544	0.054	-0.00425832	0.00218917	0.359	G
FatherMetal_Lifespan+AttainedAge	5	166761857	rs4868794	0.002491	648000	0.1818	0.008532	0.00639	0.0012	0.0165212	0.00512602	0.3856	A
FatherMetal_Lifespan+AttainedAge	5	167001332	rs7734360	0.001481	699000	0.01801	-0.006123	0.002588	0.01	-0.00574987	0.00221911	0.9133	G
FatherMetal_Lifespan+AttainedAge	5	167836641	rs1004940	0.001285	698000	0.03316	0.005426	0.002547	0.0043	0.00634043	0.00220228	0.8258	A
FatherMetal_Lifespan+AttainedAge	6	2039027	rs9503076	0.001912	698000	0.01347	0.006833	0.002765	0.018	0.00564268	0.00236278	0.7587	A
FatherMetal_Lifespan+AttainedAge	6	3384053	rs9405636	0.002431	698000	0.009136	0.0094	0.003606	0.033	0.00660176	0.00308191	0.5891	G
FatherMetal_Lifespan+AttainedAge	6	3468224	rs7775474	0.001356	698000	0.01221	-0.006369	0.002542	0.013	-0.00544574	0.00217764	0.7938	G
FatherMetal_Lifespan+AttainedAge	6	4721046	rs7767658	0.001127	698000	0.05477	0.008507	0.004429	0.0019	0.0115009	0.00372829	0.6079	G
FatherMetal_Lifespan+AttainedAge	6	6752059	rs1294438	0.0008222	697000	0.02245	-0.006119	0.002681	0.0037	-0.00675971	0.00230224	0.8897	G
FatherMetal_Lifespan+AttainedAge	6	6997161	rs6921610	0.001884	698000	0.009454	-0.006616	0.002549	0.024	-0.00478681	0.00218106	0.6472	A
FatherMetal_Lifespan+AttainedAge	6	7041700	rs13207230	0.001701	698000	0.02144	-0.005854	0.002545	0.01	-0.00558374	0.00219847	0.9477	A
FatherMetal_Lifespan+AttainedAge	6	7586308	rs12250	0.001198	698000	0.003877	-0.008728	0.003022	0.029	-0.00557799	0.00257909	0.4802	G
FatherMetal_Lifespan+AttainedAge	6	12828434	rs17679286	0.002489	697000	0.02161	0.0117	0.005091	0.016	0.010252	0.00423205	0.8686	A
FatherMetal_Lifespan+AttainedAge	6	12864134	rs9472752	0.001544	698000	0.007534	0.006851	0.002564	0.023	0.00489831	0.00220326	0.616	A
FatherMetal_Lifespan+AttainedAge	6	12874309	rs1571997	0.0006449	698000	0.001622	0.007997	0.002537	0.028	0.00468903	0.00217109	0.3793	A
FatherMetal_Lifespan+AttainedAge	6	12927845	rs4714990	0.0001573	698000	0.0005286	0.009075	0.002618	0.014	0.00544131	0.0022522	0.3461	A
FatherMetal_Lifespan+AttainedAge	6	12934687	rs7739181	0.001817	698000	0.002471	0.008139	0.002689	0.061	0.0042742	0.0023125	0.3243	G
FatherMetal_Lifespan+AttainedAge	6	12962995	rs13211739	0.0007808	698000	0.005324	-0.008321	0.002986	0.014	-0.00631302	0.0025706	0.6366	A
FatherMetal_Lifespan+AttainedAge	6	18688972	rs9371088	0.0003127	689000	0.008739	0.008262	0.003151	0.0029	0.0079871	0.00270261	0.9391	A
FatherMetal_Lifespan+AttainedAge	6	19688331	rs9366310	0.001078	695000	0.003135	-0.01013	0.003428	0.03	-0.00639526	0.0029083	0.4426	A
FatherMetal_Lifespan+AttainedAge	6	19808270	rs760793	0.001127	698000	0.01483	0.008583	0.003523	0.0086	0.00796837	0.00304736	0.8985	A
FatherMetal_Lifespan+AttainedAge	6	19924318	rs1931802	0.0001043	650000	0.0008495	0.01012	0.003034	0.0055	0.00675957	0.00242622	0.4083	A
FatherMetal_Lifespan+AttainedAge	6	21815916	rs4712634	4.953e-05	697000	0.002113	0.008082	0.002629	0.0012	0.0072669	0.00224785	0.834	A
FatherMetal_Lifespan+AttainedAge	6	21911129	rs10946483	0.001762	698000	0.07614	-0.007438	0.004194	0.0023	-0.0114649	0.00375428	0.5608	A
FatherMetal_Lifespan+AttainedAge	6	21911616	rs7745461	0.00165	698000	0.1227	-0.006214	0.004025	0.001	-0.0117659	0.0035848	0.3761	G
FatherMetal_Lifespan+AttainedAge	6	21911852	rs6456457	0.001283	698000	0.1325	-0.004412	0.002933	0.00059	-0.00881394	0.002558	0.3179	G
FatherMetal_Lifespan+AttainedAge	6	22454221	rs9466363	0.0003729	698000	0.04983	0.006762	0.003447	0.00043	0.0101352	0.00289193	0.4638	A
FatherMetal_Lifespan+AttainedAge	6	22491695	rs2504818	0.001458	697000	0.1425	0.005468	0.003728	0.00064	0.0106934	0.00315128	0.3135	A
FatherMetal_Lifespan+AttainedAge	6	22517187	rs9460753	0.001959	699000	0.1291	0.005588	0.003682	0.0012	0.0101511	0.00313344	0.3829	C
FatherMetal_Lifespan+AttainedAge	6	22518463	rs6904957	0.0005788	698000	0.04793	0.005841	0.002953	0.00087	0.00829574	0.00251606	0.5441	A
FatherMetal_Lifespan+AttainedAge	6	22606773	rs6909574	0.0006922	698000	0.01627	-0.006341	0.002639	0.0042	-0.00646303	0.00225419	0.9723	A
FatherMetal_Lifespan+AttainedAge	6	22612757	rs13217022	0.0006314	698000	0.07127	-0.005018	0.002782	0.00055	-0.00827324	0.00238041	0.4232	A
FatherMetal_Lifespan+AttainedAge	6	24347883	rs793674	0.001647	697000	0.01349	-0.007043	0.002851	0.015	-0.00597335	0.00245337	0.7868	A
FatherMetal_Lifespan+AttainedAge	6	26159356	rs2183947	0.001323	698000	0.008741	0.007865	0.003	0.017	0.00611978	0.002597	0.6897	G
FatherMetal_Lifespan+AttainedAge	6	26175852	rs9379831	0.0008654	698000	0.001201	0.008869	0.002738	0.046	0.00455689	0.00235287	0.2894	C
FatherMetal_Lifespan+AttainedAge	6	26189615	rs806977	4.669e-06	698000	0.001198	0.008405	0.002595	0.00011	0.00834174	0.00217659	0.958	A
FatherMetal_Lifespan+AttainedAge	6	26239404	rs9358913	0.0008895	698000	0.04427	0.00576	0.002864	0.0018	0.00773437	0.00247689	0.6456	A
FatherMetal_Lifespan+AttainedAge	6	26271713	rs9393690	2.069e-05	698000	0.02205	-0.006019	0.002629	2e-05	-0.00918455	0.00217319	0.3439	T
FatherMetal_Lifespan+AttainedAge	6	26303319	rs9357004	4.111e-06	698000	0.001363	-0.008398	0.002622	8.1e-05	-0.00847459	0.0021725	0.9038	G
FatherMetal_Lifespan+AttainedAge	6	26306282	rs9366648	0.0001212	698000	0.06431	0.005027	0.002717	5.1e-05	0.0092877	0.00229977	0.2616	A
FatherMetal_Lifespan+AttainedAge	6	26338056	rs4412193	0.0003622	698000	0.05659	0.005095	0.002672	0.00034	0.00805525	0.00226387	0.4205	A
FatherMetal_Lifespan+AttainedAge	6	26338434	rs2893842	0.0001253	695000	0.03993	0.005762	0.002805	0.00012	0.00902872	0.0023527	0.3958	A
FatherMetal_Lifespan+AttainedAge	6	26465384	rs12202419	0.001254	698000	0.008712	0.01123	0.004281	0.016	0.00848441	0.00356443	0.6986	A
FatherMetal_Lifespan+AttainedAge	6	26662626	rs12201890	0.002468	696000	0.009656	0.01114	0.004305	0.032	0.00756451	0.00356804	0.5992	A
FatherMetal_Lifespan+AttainedAge	6	26988417	rs6920115	0.002428	698000	0.001964	0.01376	0.004446	0.093	0.00616023	0.00371865	0.251	A
FatherMetal_Lifespan+AttainedAge	6	29346329	rs9257805	0.001748	697000	0.0112	-0.01466	0.005779	0.019	-0.00740226	0.003156	0.7123	A
FatherMetal_Lifespan+AttainedAge	6	29477414	rs1233480	0.001144	698000	0.04387	-0.01236	0.006134	0.0026	-0.00967105	0.00320232	0.6949	G
FatherMetal_Lifespan+AttainedAge	6	29477821	rs1233478	0.0008356	698000	0.005849	-0.01119	0.00406	0.014	-0.00665304	0.00272684	0.6525	C
FatherMetal_Lifespan+AttainedAge	6	29516242	rs3094576	0.0006306	698000	0.002345	0.01198	0.003937	0.021	0.00732965	0.00320644	0.4603	C
FatherMetal_Lifespan+AttainedAge	6	29742108	rs1362068	0.0003675	697000	0.0002325	-0.01283	0.003486	0.053	-0.00436934	0.00226584	0.1598	A
FatherMetal_Lifespan+AttainedAge	6	29764472	rs1633005	0.0002236	698000	0.001853	-0.01504	0.004831	0.008	-0.0070489	0.00267944	0.5599	G
FatherMetal_Lifespan+AttainedAge	6	29768344	rs1611185	0.002171	698000	0.001569	0.01067	0.003375	0.095	0.00365048	0.00220488	0.2298	A
FatherMetal_Lifespan+AttainedAge	6	29771066	rs1610657	0.0003918	695000	0.0002385	-0.01285	0.003496	0.055	-0.00433526	0.00226634	0.1568	A
FatherMetal_Lifespan+AttainedAge	6	29773509	rs1632983	0.0004021	698000	0.0002238	-0.01328	0.003599	0.059	-0.0043514	0.0023116	0.1509	G
FatherMetal_Lifespan+AttainedAge	6	29778987	rs1610699	0.000173	697000	6.756e-05	-0.01435	0.003602	0.052	-0.00441486	0.00229943	0.1071	A
FatherMetal_Lifespan+AttainedAge	6	29785538	rs2735028	0.0003845	698000	0.0006594	-0.01211	0.003555	0.03	-0.00486192	0.00226689	0.2835	G
FatherMetal_Lifespan+AttainedAge	6	29788606	rs1610675	0.0009259	696000	0.00291	-0.01088	0.003654	0.027	-0.00509945	0.00232242	0.45	G
FatherMetal_Lifespan+AttainedAge	6	29814778	rs1611750	0.00234	696000	0.002747	-0.01198	0.004	0.073	-0.00447953	0.00250544	0.3094	A
FatherMetal_Lifespan+AttainedAge	6	29823164	rs2517855	0.0005004	698000	0.01835	-0.0121	0.005132	0.0024	-0.00829061	0.00274273	0.8662	G
FatherMetal_Lifespan+AttainedAge	6	29833779	rs2734974	1.524e-05	696000	0.000204	-0.01618	0.004357	0.0023	-0.00772242	0.00253836	0.4407	A
FatherMetal_Lifespan+AttainedAge	6	29988642	rs3129012	0.0005988	698000	0.05172	-0.009894	0.005086	0.00082	-0.00904782	0.0027099	0.5226	G
FatherMetal_Lifespan+AttainedAge	6	30066031	rs916570	0.0005191	698000	0.006767	-0.01023	0.003776	0.007	-0.00650409	0.00240206	0.7835	A
FatherMetal_Lifespan+AttainedAge	6	30069795	rs1108052	0.000326	698000	0.01587	-0.009849	0.004083	0.0016	-0.00781177	0.0024707	0.8393	A
FatherMetal_Lifespan+AttainedAge	6	30071279	rs1116222	0.0001065	698000	0.002399	-0.01217	0.004009	0.0027	-0.00725402	0.00241068	0.747	A
FatherMetal_Lifespan+AttainedAge	6	30092935	rs1419674	0.002292	698000	0.02833	0.01844	0.008408	0.011	0.0142066	0.00555851	0.9924	C
FatherMetal_Lifespan+AttainedAge	6	30296253	rs3094064	0.00177	698000	0.0682	-0.01201	0.006588	0.0027	-0.00943595	0.00316783	0.6044	G
FatherMetal_Lifespan+AttainedAge	6	30726939	rs3095340	0.001566	698000	0.00768	-0.01241	0.004656	0.023	-0.00626857	0.00281619	0.6182	A
FatherMetal_Lifespan+AttainedAge	6	30907335	rs3131921	0.001937	698000	0.1069	-0.008715	0.005405	0.0016	-0.00902483	0.00290317	0.449	A
FatherMetal_Lifespan+AttainedAge	6	30914843	rs3130782	0.0002532	698000	0.002205	-0.01413	0.004616	0.008	-0.00749434	0.0028824	0.5851	G
FatherMetal_Lifespan+AttainedAge	6	30931844	rs3131934	9.388e-05	698000	0.003532	-0.01473	0.005048	0.0016	-0.00892061	0.00288317	0.8832	A
FatherMetal_Lifespan+AttainedAge	6	30932068	rs3131783	3.53e-05	696000	0.001157	-0.01589	0.004892	0.0014	-0.00886558	0.0028268	0.7176	G
FatherMetal_Lifespan+AttainedAge	6	30933975	rs2532919	0.00117	697000	0.0413	0.007925	0.003884	0.0029	0.00944527	0.00313971	0.7256	A
FatherMetal_Lifespan+AttainedAge	6	31008598	rs2517549	0.002443	698000	0.3402	-0.002972	0.003116	0.00025	-0.00821029	0.0022514	0.1299	C
FatherMetal_Lifespan+AttainedAge	6	31014305	rs9262582	0.0007565	698000	0.02445	-0.01195	0.005312	0.003	-0.011016	0.00368611	0.839	C
FatherMetal_Lifespan+AttainedAge	6	31080471	rs1265052	0.001366	698000	0.1126	0.004654	0.002933	0.00086	0.00729553	0.00217069	0.3788	G
FatherMetal_Lifespan+AttainedAge	6	31082987	rs3094220	0.0006306	698000	0.1739	-0.005488	0.004036	0.00011	-0.00938909	0.00243419	0.1756	A
FatherMetal_Lifespan+AttainedAge	6	31172151	rs3132510	0.001019	698000	0.05578	-0.01334	0.006976	0.0016	-0.00985389	0.00315913	0.5828	A
FatherMetal_Lifespan+AttainedAge	6	31265539	rs3905495	0.002445	698000	0.0108	0.007856	0.003082	0.029	0.00509705	0.00233377	0.6375	G
FatherMetal_Lifespan+AttainedAge	6	31269173	rs9366778	0.0001929	698000	0.001133	0.009832	0.00302	0.01	0.00583473	0.00226316	0.4679	G
FatherMetal_Lifespan+AttainedAge	6	31335647	rs2844571	0.0003476	697000	0.0466	-0.006809	0.003422	0.00043	-0.00803007	0.00229049	0.4783	A
FatherMetal_Lifespan+AttainedAge	6	31345229	rs2844545	6.399e-05	696000	0.03391	-0.006932	0.003268	5.6e-05	-0.00906042	0.00225666	0.3594	G
FatherMetal_Lifespan+AttainedAge	6	31346445	rs2523627	0.001394	697000	0.2525	0.003473	0.003035	0.00019	0.00832636	0.00222943	0.1554	A
FatherMetal_Lifespan+AttainedAge	6	31346937	rs9501587	0.00211	697000	0.2788	0.004059	0.003747	0.00031	0.00988426	0.00275655	0.1646	G
FatherMetal_Lifespan+AttainedAge	6	31347057	rs9266638	7.077e-05	698000	0.004829	0.008847	0.003139	0.00081	0.00799539	0.00240246	0.9713	G
FatherMetal_Lifespan+AttainedAge	6	31348077	rs9266669	3.027e-05	695000	0.01986	-0.01199	0.005148	4.2e-05	-0.0117689	0.00290416	0.4192	G
FatherMetal_Lifespan+AttainedAge	6	31348580	rs9266689	0.001016	698000	0.01381	0.007728	0.003139	0.0081	0.00597212	0.00225459	0.8935	G
FatherMetal_Lifespan+AttainedAge	6	31379115	rs1131896	0.00191	697000	0.005738	0.009006	0.00326	0.036	0.00544134	0.00257868	0.5021	G
FatherMetal_Lifespan+AttainedAge	6	31417191	rs3128982	3.065e-08	698000	0.0005041	-0.01147	0.003296	3.7e-07	-0.0115651	0.00227666	0.5423	A
FatherMetal_Lifespan+AttainedAge	6	31420500	rs3131622	3.777e-05	698000	0.01173	-0.007367	0.002923	0.00012	-0.00841346	0.0021815	0.5909	A
FatherMetal_Lifespan+AttainedAge	6	31425499	rs3131621	8.862e-09	697000	0.0007715	-0.01061	0.003155	3.6e-08	-0.0123669	0.00224504	0.3502	A
FatherMetal_Lifespan+AttainedAge	6	31506210	rs3093974	3.918e-05	698000	0.0003393	-0.01177	0.003283	0.0044	-0.0064128	0.00226396	0.4287	G
FatherMetal_Lifespan+AttainedAge	6	31614102	rs2242656	0.00115	695000	0.002778	0.01134	0.003791	0.035	0.00569746	0.00271877	0.4062	A
FatherMetal_Lifespan+AttainedAge	6	31618761	rs3130050	0.001607	698000	0.002465	0.01496	0.00494	0.054	0.00584661	0.00303027	0.3397	A
FatherMetal_Lifespan+AttainedAge	6	31628733	rs805262	6.691e-05	698000	0.002641	-0.008339	0.002774	0.0014	-0.00688172	0.00217552	0.8523	G
FatherMetal_Lifespan+AttainedAge	6	31717692	rs3117572	0.0004459	698000	0.001236	0.01379	0.004269	0.023	0.00621526	0.00275323	0.3744	G
FatherMetal_Lifespan+AttainedAge	6	31726688	rs707939	0.0009522	698000	0.001442	-0.009594	0.003011	0.045	-0.0046585	0.00232173	0.3083	C
FatherMetal_Lifespan+AttainedAge	6	31733466	rs3101017	0.0008926	697000	0.01814	-0.0165	0.006984	0.0052	-0.00881764	0.00319593	0.9849	A
FatherMetal_Lifespan+AttainedAge	6	31778272	rs2227956	0.0006847	698000	0.00234	0.01298	0.004265	0.023	0.00618605	0.00275405	0.448	A
FatherMetal_Lifespan+AttainedAge	6	31812038	rs9267576	0.001596	698000	0.003213	0.01483	0.005033	0.045	0.00609119	0.00306375	0.3945	C
FatherMetal_Lifespan+AttainedAge	6	31840625	rs614549	0.001035	696000	0.002028	-0.009073	0.00294	0.039	-0.00469254	0.00229358	0.358	A
FatherMetal_Lifespan+AttainedAge	6	31864547	rs7887	0.0006975	692000	0.001273	-0.009948	0.003087	0.035	-0.00479226	0.00232322	0.3177	C
FatherMetal_Lifespan+AttainedAge	6	31888367	rs3130683	0.0002061	696000	0.0002169	0.01805	0.00488	0.032	0.00652407	0.00306049	0.1942	A
FatherMetal_Lifespan+AttainedAge	6	31894626	rs3020644	0.001063	698000	0.002129	-0.00921	0.002998	0.039	-0.00459283	0.00226239	0.3662	A
FatherMetal_Lifespan+AttainedAge	6	31946614	rs6941112	0.0004917	698000	0.0003559	-0.01115	0.003123	0.055	-0.00450738	0.00239416	0.1819	G
FatherMetal_Lifespan+AttainedAge	6	32050544	rs3130287	0.0006783	698000	0.0001313	0.01773	0.004636	0.12	0.00469131	0.00303503	0.08391	A
FatherMetal_Lifespan+AttainedAge	6	32105001	rs4713505	0.001605	698000	0.0002525	-0.01146	0.003132	0.18	-0.00323973	0.00246409	0.08186	C
FatherMetal_Lifespan+AttainedAge	6	32112626	rs3130279	0.002096	698000	0.001354	0.01465	0.00457	0.1	0.00490071	0.0030311	0.2137	G
FatherMetal_Lifespan+AttainedAge	6	32113980	rs4713506	0.001256	698000	0.0006777	-0.01076	0.003165	0.091	-0.00413979	0.00249359	0.1763	G
FatherMetal_Lifespan+AttainedAge	6	32278635	rs9268199	0.0001866	698000	0.0008444	0.0128	0.003836	0.012	0.00703685	0.0028258	0.4112	A
FatherMetal_Lifespan+AttainedAge	6	32338986	rs2073044	0.0009008	698000	0.03074	-0.006594	0.003052	0.0029	-0.00734221	0.00247364	0.7857	G
FatherMetal_Lifespan+AttainedAge	6	32339897	rs2050188	0.000893	697000	0.2201	0.003613	0.002946	0.00012	0.00897302	0.00233923	0.152	A
FatherMetal_Lifespan+AttainedAge	6	32354428	rs4424066	0.0004152	698000	0.01096	-0.007289	0.002865	0.0033	-0.00646366	0.00218246	0.9851	A
FatherMetal_Lifespan+AttainedAge	6	32367795	rs2294878	0.0002839	698000	0.01159	-0.007194	0.00285	0.0019	-0.00677208	0.00217587	0.9239	C
FatherMetal_Lifespan+AttainedAge	6	32376348	rs3763312	0.00136	693000	0.008418	-0.008634	0.003277	0.018	-0.0061753	0.00261183	0.6643	G
FatherMetal_Lifespan+AttainedAge	6	32400088	rs984778	0.0003341	698000	0.000529	0.01035	0.002986	0.03	0.00505537	0.00230007	0.2652	A
FatherMetal_Lifespan+AttainedAge	6	32405026	rs2395175	0.000344	696000	0.02803	-0.008051	0.003665	0.00086	-0.00941791	0.00284132	0.6532	G
FatherMetal_Lifespan+AttainedAge	6	32561334	rs35265698	0.001195	695000	0.01235	-0.009022	0.003606	0.011	-0.00699511	0.00276865	0.8164	C
FatherMetal_Lifespan+AttainedAge	6	32748590	rs34043227	0.001271	697000	0.0112	-0.0166	0.006545	0.013	-0.0110181	0.00452442	0.7754	G
FatherMetal_Lifespan+AttainedAge	6	32909533	rs35029304	0.0004017	698000	0.005421	-0.01927	0.00693	0.0063	-0.0131266	0.00489849	0.7605	A
FatherMetal_Lifespan+AttainedAge	6	32965085	rs3128948	0.001239	698000	0.005841	-0.009023	0.003273	0.022	-0.00580825	0.00258205	0.5822	G
FatherMetal_Lifespan+AttainedAge	6	32972903	rs35776718	0.001516	698000	0.007751	-0.01038	0.003899	0.022	-0.00694335	0.00304277	0.6273	G
FatherMetal_Lifespan+AttainedAge	6	32978178	rs6911639	0.001063	698000	0.01445	-0.007967	0.003257	0.0082	-0.00693698	0.00262608	0.9007	A
FatherMetal_Lifespan+AttainedAge	6	32985199	rs1367731	0.001564	698000	0.01752	-0.008567	0.003606	0.011	-0.00720821	0.00284593	0.8909	G
FatherMetal_Lifespan+AttainedAge	6	33232055	rs213202	0.0003677	698000	0.003845	0.007851	0.002716	0.0077	0.00603229	0.00227181	0.6745	G
FatherMetal_Lifespan+AttainedAge	6	33246518	rs3445	0.001357	698000	0.0007435	-0.01202	0.003564	0.093	-0.00490512	0.00300572	0.1802	G
FatherMetal_Lifespan+AttainedAge	6	33282338	rs1061801	1.815e-06	684000	3.195e-06	-0.01574	0.003379	0.0041	-0.00780922	0.0027678	0.1143	G
FatherMetal_Lifespan+AttainedAge	6	33312308	rs3130014	0.0002775	698000	0.007071	0.007459	0.002769	0.0031	0.00685164	0.00232713	0.9117	A
FatherMetal_Lifespan+AttainedAge	6	33320613	rs211474	0.0002943	650000	0.004167	0.008824	0.00308	0.0051	0.00662168	0.00236648	0.6352	G
FatherMetal_Lifespan+AttainedAge	6	33554147	rs419261	0.0003948	698000	0.0007658	-0.00878	0.002609	0.028	-0.00479423	0.00220856	0.3044	G
FatherMetal_Lifespan+AttainedAge	6	33648997	rs4713656	0.0001445	698000	0.001672	-0.00859	0.002733	0.0053	-0.00638135	0.00230274	0.6018	A
FatherMetal_Lifespan+AttainedAge	6	33661091	rs3818528	0.0001882	698000	0.002199	-0.008261	0.002698	0.0057	-0.0062133	0.00225018	0.6306	A
FatherMetal_Lifespan+AttainedAge	6	33668618	rs597386	8.2e-05	697000	0.001933	-0.009785	0.003156	0.0024	-0.00820009	0.00269373	0.7261	A
FatherMetal_Lifespan+AttainedAge	6	33702869	rs622917	0.0007473	698000	0.002374	-0.007796	0.002565	0.025	-0.00487561	0.00218934	0.4386	G
FatherMetal_Lifespan+AttainedAge	6	33703089	rs623813	0.0009546	650000	0.006953	-0.01045	0.003871	0.013	-0.00761125	0.00303756	0.5929	G
FatherMetal_Lifespan+AttainedAge	6	33703230	rs545787	1.357e-05	698000	0.0003533	-0.009689	0.002712	0.0013	-0.00729454	0.00225538	0.5702	G
FatherMetal_Lifespan+AttainedAge	6	33710038	rs568901	0.0002616	698000	0.008796	-0.007644	0.002918	0.0023	-0.00752302	0.00245892	0.9957	A
FatherMetal_Lifespan+AttainedAge	6	33774948	rs10947439	0.002447	698000	0.1094	-0.004351	0.002718	0.0022	-0.0071673	0.00231861	0.4779	A
FatherMetal_Lifespan+AttainedAge	6	33794258	rs9469599	0.0001693	698000	0.006533	-0.01198	0.004406	0.0018	-0.0120265	0.00380095	0.9745	C
FatherMetal_Lifespan+AttainedAge	6	34715341	rs9462007	0.0009969	698000	0.0827	-0.006068	0.003497	0.00087	-0.0102198	0.00307167	0.4384	G
FatherMetal_Lifespan+AttainedAge	6	34728253	rs9462014	0.002257	694000	0.08021	-0.005918	0.003383	0.0031	-0.00869979	0.00294513	0.5936	A
FatherMetal_Lifespan+AttainedAge	6	36009495	rs12199654	0.002258	694000	0.01901	-0.01256	0.005357	0.016	-0.0112795	0.00460101	0.838	A
FatherMetal_Lifespan+AttainedAge	6	36362441	rs12663882	0.00225	695000	0.3231	-0.002983	0.003019	0.00025	-0.00939211	0.00256042	0.1379	A
FatherMetal_Lifespan+AttainedAge	6	36629444	rs10807170	0.0006127	698000	0.01039	0.006822	0.002662	0.0057	0.00646615	0.00229535	0.8935	A
FatherMetal_Lifespan+AttainedAge	6	36645696	rs2395655	0.0009073	698000	0.0271	0.005746	0.0026	0.0034	0.00660577	0.00224105	0.8352	A
FatherMetal_Lifespan+AttainedAge	6	36646788	rs3176320	0.0004814	697000	0.0148	0.006542	0.002684	0.0029	0.00698134	0.00232347	0.9385	A
FatherMetal_Lifespan+AttainedAge	6	37324857	rs2269058	0.0001167	698000	0.02108	0.005862	0.002541	0.00027	0.00786126	0.00217521	0.5726	A
FatherMetal_Lifespan+AttainedAge	6	37348920	rs2284923	0.0001868	698000	0.02157	-0.00584	0.002542	0.00051	-0.007511	0.00217925	0.6368	G
FatherMetal_Lifespan+AttainedAge	6	37349033	rs2284922	8.861e-05	698000	0.005197	-0.007479	0.002676	0.001	-0.00758418	0.00232133	0.9861	G
FatherMetal_Lifespan+AttainedAge	6	37358022	rs195432	0.000445	698000	0.04917	0.005212	0.002649	0.00057	0.00788367	0.0023046	0.4941	C
FatherMetal_Lifespan+AttainedAge	6	37368049	rs195436	0.000226	698000	0.06559	-0.00515	0.002797	0.00013	-0.00922985	0.0024122	0.3187	A
FatherMetal_Lifespan+AttainedAge	6	37415125	rs9380673	2.333e-06	698000	0.0006041	-0.008766	0.002556	9.4e-05	-0.00844469	0.00217701	0.9522	G
FatherMetal_Lifespan+AttainedAge	6	37431757	rs2776906	0.0002417	698000	0.01059	-0.007086	0.002772	0.0017	-0.00726801	0.00235383	0.9259	G
FatherMetal_Lifespan+AttainedAge	6	37459576	rs11752757	0.0009557	698000	0.01024	-0.01272	0.004955	0.01	-0.0112637	0.0043776	0.8031	G
FatherMetal_Lifespan+AttainedAge	6	37466079	rs931649	0.001538	697000	0.04	-0.006099	0.002969	0.0044	-0.00702274	0.00250618	0.7911	G
FatherMetal_Lifespan+AttainedAge	6	37477262	rs2797793	5.578e-05	698000	0.01045	-0.006691	0.002613	0.00024	-0.00813147	0.00222344	0.6837	G
FatherMetal_Lifespan+AttainedAge	6	37483808	rs1757188	7.161e-08	698000	9.536e-05	-0.009955	0.002551	8e-06	-0.00970241	0.00217999	0.959	G
FatherMetal_Lifespan+AttainedAge	6	37485728	rs1757181	1.278e-05	698000	0.0007634	-0.008988	0.00267	0.00061	-0.00771989	0.0022759	0.7663	A
FatherMetal_Lifespan+AttainedAge	6	37688151	rs6458014	0.0003503	689000	0.002781	0.007814	0.002612	0.0094	0.00576927	0.00221876	0.5775	G
FatherMetal_Lifespan+AttainedAge	6	38287910	rs4714146	0.002491	698000	0.2819	-0.004746	0.00441	0.0004	-0.0130523	0.00371846	0.1747	G
FatherMetal_Lifespan+AttainedAge	6	38373601	rs10484928	0.002083	698000	0.002356	-0.03933	0.01293	0.072	-0.0200414	0.0112619	0.2986	A
FatherMetal_Lifespan+AttainedAge	6	38483167	rs16890768	0.001941	698000	0.0001593	-0.02122	0.005621	0.25	-0.00566974	0.00476285	0.05298	A
FatherMetal_Lifespan+AttainedAge	6	38545942	rs2748168	0.00137	693000	8.591e-05	-0.01043	0.002657	0.24	-0.00273387	0.00224965	0.04156	G
FatherMetal_Lifespan+AttainedAge	6	38562964	rs16890840	0.002454	697000	0.002972	-0.01584	0.005332	0.073	-0.00813771	0.00448656	0.3181	A
FatherMetal_Lifespan+AttainedAge	6	38654488	rs3778443	0.0008691	698000	0.0004139	-0.01841	0.005212	0.085	-0.00778921	0.00443109	0.1544	G
FatherMetal_Lifespan+AttainedAge	6	38679676	rs1616723	0.0003689	696000	8.942e-05	-0.01854	0.004731	0.086	-0.00695804	0.00400326	0.08859	A
FatherMetal_Lifespan+AttainedAge	6	39150098	rs1428373	0.0002391	697000	3.235e-06	-0.01204	0.002587	0.23	-0.00282743	0.00221956	0.01181	G
FatherMetal_Lifespan+AttainedAge	6	39156108	rs2815095	0.0002495	698000	4.148e-05	-0.01179	0.002876	0.09	-0.00438391	0.00246883	0.06669	G
FatherMetal_Lifespan+AttainedAge	6	39158339	rs4714222	0.001032	698000	0.0002343	-0.009373	0.002548	0.13	-0.00347545	0.00218982	0.09864	G
FatherMetal_Lifespan+AttainedAge	6	39164121	rs751933	0.001706	698000	0.0006729	-0.008646	0.002543	0.12	-0.00354627	0.00218223	0.1517	G
FatherMetal_Lifespan+AttainedAge	6	39166496	rs12207689	0.001585	699000	0.0005932	0.01026	0.002987	0.12	0.00419247	0.00255179	0.1452	A
FatherMetal_Lifespan+AttainedAge	6	43193877	rs7832	0.0002783	698000	0.007335	0.01135	0.004231	0.003	0.0104913	0.00353117	0.9243	G
FatherMetal_Lifespan+AttainedAge	6	43352898	rs6919440	0.001852	698000	0.02557	-0.005718	0.002561	0.0093	-0.00561543	0.00219188	0.998	A
FatherMetal_Lifespan+AttainedAge	6	43352980	rs1214759	0.00012	698000	0.005105	-0.007566	0.002702	0.0015	-0.00735411	0.00232824	0.9564	G
FatherMetal_Lifespan+AttainedAge	6	46054285	rs2185108	0.0002875	698000	0.00405	-0.01613	0.00561	0.0055	-0.0134407	0.00482648	0.7318	G
FatherMetal_Lifespan+AttainedAge	6	46946284	rs11758018	0.0007598	698000	0.002433	-0.01051	0.003468	0.025	-0.00664869	0.00295872	0.4416	G
FatherMetal_Lifespan+AttainedAge	6	49801612	rs10498779	0.001848	698000	0.0409	-0.007331	0.003586	0.0055	-0.00820797	0.00299811	0.8167	G
FatherMetal_Lifespan+AttainedAge	6	49870164	rs12207683	0.002227	697000	0.4014	-0.002878	0.00343	0.00014	-0.0108942	0.00289133	0.09334	A
FatherMetal_Lifespan+AttainedAge	6	50829511	rs4715209	0.001926	698000	0.09498	0.005948	0.003562	0.0019	0.00960415	0.00310278	0.4917	A
FatherMetal_Lifespan+AttainedAge	6	50947295	rs4082052	0.0007533	698000	0.03152	-0.00577	0.002683	0.0022	-0.00699572	0.00228465	0.7425	A
FatherMetal_Lifespan+AttainedAge	6	50953315	rs579544	0.0002405	698000	0.06942	0.006909	0.003805	0.00013	0.0126523	0.00329794	0.31	A
FatherMetal_Lifespan+AttainedAge	6	53960803	rs1407239	0.0003789	697000	0.002335	-0.007965	0.002617	0.012	-0.00564913	0.00227559	0.5341	A
FatherMetal_Lifespan+AttainedAge	6	53999025	rs816379	0.0001947	698000	0.003177	-0.007781	0.002638	0.0043	-0.00645528	0.00225287	0.7277	A
FatherMetal_Lifespan+AttainedAge	6	67185712	rs9345837	0.001652	698000	0.09135	-0.004871	0.002885	0.0016	-0.00780767	0.00246816	0.481	A
FatherMetal_Lifespan+AttainedAge	6	67968844	rs6903890	0.001746	695000	0.2114	-0.004053	0.003243	0.00041	-0.00996072	0.00278541	0.2204	G
FatherMetal_Lifespan+AttainedAge	6	72882414	rs2496495	0.0001898	698000	0.02297	-0.006004	0.00264	0.00048	-0.00780286	0.00224676	0.6185	A
FatherMetal_Lifespan+AttainedAge	6	72902964	rs1830338	0.0009986	698000	0.378	-0.002691	0.003053	3.8e-05	-0.0106214	0.0025818	0.06648	A
FatherMetal_Lifespan+AttainedAge	6	72908238	rs1819062	0.0001806	694000	0.02895	-0.005893	0.002698	0.00033	-0.00810502	0.00227706	0.5441	A
FatherMetal_Lifespan+AttainedAge	6	72941467	rs1971561	0.0006057	698000	0.03982	0.005743	0.002794	0.0012	0.00759924	0.00239241	0.6185	G
FatherMetal_Lifespan+AttainedAge	6	72998372	rs988096	0.001365	698000	0.1486	-0.003791	0.002624	0.00053	-0.00763772	0.00224312	0.2902	A
FatherMetal_Lifespan+AttainedAge	6	73029875	rs9442769	0.0004505	698000	0.2538	0.002978	0.00261	2.6e-05	0.00936572	0.00223992	0.08772	C
FatherMetal_Lifespan+AttainedAge	6	78401868	rs12203229	0.0001961	698000	0.0009089	-0.008457	0.002549	0.012	-0.0055458	0.00218605	0.4195	G
FatherMetal_Lifespan+AttainedAge	6	79316230	rs10806133	0.0002092	696000	0.07258	0.004608	0.002566	9.8e-05	0.00844865	0.00219127	0.2876	A
FatherMetal_Lifespan+AttainedAge	6	79318288	rs1995650	4.122e-06	696000	0.0005495	-0.008916	0.00258	0.00021	-0.00810837	0.00219979	0.8407	G
FatherMetal_Lifespan+AttainedAge	6	79341891	rs236855	1.373e-05	690000	0.002742	-0.007961	0.002658	0.00018	-0.00836084	0.00224938	0.9061	A
FatherMetal_Lifespan+AttainedAge	6	79345146	rs512778	0.0008143	698000	0.01082	0.006683	0.002622	0.0078	0.00600664	0.00224659	0.8523	A
FatherMetal_Lifespan+AttainedAge	6	79369333	rs12210702	4.408e-06	698000	0.002821	-0.008053	0.002696	3.8e-05	-0.00951986	0.00232276	0.7082	A
FatherMetal_Lifespan+AttainedAge	6	79379460	rs1954659	0.001645	698000	0.2788	0.002954	0.002728	0.0002	0.00865482	0.00234077	0.1445	C
FatherMetal_Lifespan+AttainedAge	6	79396968	rs9352611	2.134e-06	698000	0.005684	-0.007251	0.002622	5.4e-06	-0.0101787	0.00225279	0.4319	A
FatherMetal_Lifespan+AttainedAge	6	79455282	rs9343798	1.145e-06	698000	0.007619	-0.00692	0.002593	1.4e-06	-0.0106193	0.00222205	0.3097	A
FatherMetal_Lifespan+AttainedAge	6	79461603	rs9350774	4.255e-05	698000	0.02658	-0.005668	0.002556	4.4e-05	-0.00884181	0.00218897	0.3735	A
FatherMetal_Lifespan+AttainedAge	6	79572678	rs9352668	0.0006507	698000	0.006152	0.007099	0.002591	0.01	0.00563987	0.00222105	0.7127	G
FatherMetal_Lifespan+AttainedAge	6	79595097	rs6908105	0.0001519	697000	0.008376	0.007016	0.002661	0.0012	0.00733264	0.00227389	0.9273	A
FatherMetal_Lifespan+AttainedAge	6	79657391	rs1984195	0.0001551	698000	0.005867	-0.007005	0.002543	0.0018	-0.00673296	0.00217695	0.9559	G
FatherMetal_Lifespan+AttainedAge	6	79674929	rs10943608	9.408e-06	698000	0.01018	-0.006711	0.002612	2e-05	-0.00946438	0.00224033	0.4518	A
FatherMetal_Lifespan+AttainedAge	6	79675701	rs9350797	0.001433	694000	0.009682	0.007286	0.002817	0.017	0.00555334	0.00234822	0.6992	A
FatherMetal_Lifespan+AttainedAge	6	79745107	rs10943613	0.002017	697000	0.0176	0.006064	0.002554	0.015	0.00524011	0.00217952	0.8388	A
FatherMetal_Lifespan+AttainedAge	6	79822314	rs1415310	7.174e-05	698000	0.01043	-0.006635	0.002591	0.00034	-0.00793182	0.00223437	0.724	G
FatherMetal_Lifespan+AttainedAge	6	79835010	rs6454096	0.0002152	698000	0.1275	0.003897	0.002557	3.5e-05	0.008981	0.00218242	0.1614	G
FatherMetal_Lifespan+AttainedAge	6	79855431	rs6904674	9.224e-06	698000	0.04039	-0.005232	0.002552	2e-06	-0.0103217	0.00218675	0.1604	A
FatherMetal_Lifespan+AttainedAge	6	79859877	rs9352701	0.001892	698000	0.01415	0.006841	0.002788	0.017	0.00569747	0.00239005	0.7777	A
FatherMetal_Lifespan+AttainedAge	6	79861169	rs9294130	0.0003044	696000	0.04021	0.00552	0.002691	0.00044	0.00811476	0.00230796	0.5097	G
FatherMetal_Lifespan+AttainedAge	6	80750290	rs608962	0.0001916	693000	0.04083	-0.005248	0.002566	0.00022	-0.00827893	0.0022015	0.4469	A
FatherMetal_Lifespan+AttainedAge	6	80775330	rs3812152	0.001689	694000	0.02122	-0.00599	0.0026	0.01	-0.00586485	0.00222109	0.9375	G
FatherMetal_Lifespan+AttainedAge	6	82531367	rs194606	7.648e-05	698000	0.002045	-0.009255	0.003001	0.0021	-0.00787392	0.00257464	0.7557	A
FatherMetal_Lifespan+AttainedAge	6	82555016	rs3812145	2.288e-05	698000	0.001519	-0.009191	0.002898	0.00064	-0.00840649	0.002473	0.8641	G
FatherMetal_Lifespan+AttainedAge	6	82569146	rs12214571	0.001787	698000	0.001879	0.00821	0.002641	0.071	0.00399464	0.00226134	0.2783	G
FatherMetal_Lifespan+AttainedAge	6	82571236	rs9443939	0.0001151	698000	0.005189	-0.007372	0.002638	0.0014	-0.00720683	0.00225862	0.9685	A
FatherMetal_Lifespan+AttainedAge	6	82587813	rs9361865	0.001172	698000	0.003585	-0.007459	0.002561	0.03	-0.00477923	0.00219172	0.4646	G
FatherMetal_Lifespan+AttainedAge	6	82611058	rs9361875	0.000464	698000	0.06691	0.004665	0.002546	0.00038	0.00782841	0.00218169	0.4005	G
FatherMetal_Lifespan+AttainedAge	6	82638452	rs1573031	0.0002008	698000	0.007642	-0.01639	0.006144	0.0019	-0.0163738	0.00519915	0.9963	G
FatherMetal_Lifespan+AttainedAge	6	82739863	rs945855	0.0002742	698000	0.008603	-0.006822	0.002597	0.0025	-0.0068122	0.00222572	0.9787	C
FatherMetal_Lifespan+AttainedAge	6	88843377	rs9353525	0.001445	697000	0.004653	0.01109	0.003919	0.031	0.00716881	0.00332426	0.494	G
FatherMetal_Lifespan+AttainedAge	6	90075359	rs1062108	0.002321	698000	0.000844	0.008659	0.002594	0.14	0.00317241	0.00222561	0.1506	G
FatherMetal_Lifespan+AttainedAge	6	90739827	rs9362711	0.001141	698000	0.01317	-0.008753	0.003531	0.0098	-0.00809761	0.00315223	0.8541	G
FatherMetal_Lifespan+AttainedAge	6	90776990	rs6932747	0.001173	697000	0.0002929	0.01342	0.003707	0.13	0.00515536	0.00341865	0.1067	G
FatherMetal_Lifespan+AttainedAge	6	93179624	rs10944594	0.002035	696000	0.03056	0.01149	0.005315	0.0087	0.0122011	0.00464825	0.9565	A
FatherMetal_Lifespan+AttainedAge	6	95080580	rs9354114	0.001446	692000	0.01321	-0.007699	0.003107	0.013	-0.00654967	0.00267678	0.7969	A
FatherMetal_Lifespan+AttainedAge	6	97094092	rs1413524	0.001795	698000	0.0459	0.008876	0.004446	0.0046	0.0124672	0.004382	0.7643	C
FatherMetal_Lifespan+AttainedAge	6	97967913	rs7775139	0.001189	698000	0.0136	0.006415	0.0026	0.01	0.00567081	0.0022201	0.8567	G
FatherMetal_Lifespan+AttainedAge	6	98328774	rs9401295	0.0007315	698000	0.08609	-0.004447	0.002591	0.00051	-0.00773658	0.00221593	0.3827	A
FatherMetal_Lifespan+AttainedAge	6	98332567	rs10484867	3.886e-05	696000	0.1199	0.003984	0.002561	2.3e-06	0.0103924	0.00217935	0.08543	G
FatherMetal_Lifespan+AttainedAge	6	98337903	rs6928545	0.000307	698000	0.0324	-0.005857	0.002737	0.0006	-0.00804083	0.00234196	0.5792	A
FatherMetal_Lifespan+AttainedAge	6	98344031	rs9372625	0.0002181	698000	0.3167	0.002629	0.002626	3.9e-06	0.0104934	0.00224316	0.04072	G
FatherMetal_Lifespan+AttainedAge	6	98395421	rs9372650	9.285e-05	696000	0.3061	0.002631	0.002571	9.2e-07	0.0108871	0.00219402	0.02796	A
FatherMetal_Lifespan+AttainedAge	6	98435125	rs10872224	0.0006806	697000	0.6243	0.001276	0.002606	3.5e-06	0.010413	0.00222347	0.01583	A
FatherMetal_Lifespan+AttainedAge	6	98517272	rs12214442	0.00153	696000	0.1332	-0.003873	0.002579	0.00078	-0.00739996	0.00219639	0.3425	G
FatherMetal_Lifespan+AttainedAge	6	98547488	rs9490542	0.002027	698000	0.09662	-0.004316	0.002598	0.002	-0.00706473	0.00227726	0.4936	G
FatherMetal_Lifespan+AttainedAge	6	100743929	rs9376845	0.002413	698000	0.1567	-0.008358	0.005901	0.0012	-0.0165011	0.00508266	0.3463	C
FatherMetal_Lifespan+AttainedAge	6	100769678	rs10046239	0.001302	698000	0.02116	-0.01013	0.004396	0.0072	-0.0102204	0.00379309	0.9989	A
FatherMetal_Lifespan+AttainedAge	6	103496197	rs2399886	0.002016	698000	0.004305	0.007255	0.002541	0.047	0.00427827	0.0021834	0.4245	G
FatherMetal_Lifespan+AttainedAge	6	103684742	rs6919280	0.0003233	698000	0.003858	0.007617	0.002636	0.0066	0.00617387	0.00226089	0.6972	G
FatherMetal_Lifespan+AttainedAge	6	103774790	rs12207319	0.0003523	698000	0.004327	0.00781	0.002737	0.0066	0.00647181	0.00235866	0.7159	G
FatherMetal_Lifespan+AttainedAge	6	103793130	rs11156266	0.0005369	696000	0.00288	0.008097	0.002717	0.015	0.00563824	0.00232569	0.5313	A
FatherMetal_Lifespan+AttainedAge	6	103795379	rs12198596	0.001667	696000	0.007547	0.007677	0.002873	0.025	0.00557203	0.00246431	0.5995	G
FatherMetal_Lifespan+AttainedAge	6	103827338	rs12196235	0.0003342	692000	0.001925	0.00894	0.002882	0.012	0.00632321	0.00248337	0.499	A
FatherMetal_Lifespan+AttainedAge	6	104214242	rs9373729	0.001149	698000	0.007732	0.006966	0.002615	0.016	0.00561604	0.002338	0.6777	A
FatherMetal_Lifespan+AttainedAge	6	104365392	rs9322781	0.001574	698000	0.01105	0.01058	0.004163	0.017	0.00839995	0.00354394	0.7308	A
FatherMetal_Lifespan+AttainedAge	6	107399357	rs9384641	0.001321	695000	0.07667	0.004547	0.002569	0.0015	0.00709257	0.00218194	0.5149	A
FatherMetal_Lifespan+AttainedAge	6	107419041	rs7762756	0.0005286	697000	0.02497	0.005847	0.002608	0.0018	0.00720066	0.00227064	0.7658	G
FatherMetal_Lifespan+AttainedAge	6	108885623	rs1536057	0.000472	698000	0.03693	0.00594	0.002847	0.00093	0.00799873	0.00242343	0.6034	G
FatherMetal_Lifespan+AttainedAge	6	108941393	rs17598747	0.001659	697000	0.02433	0.009563	0.004246	0.0085	0.00964417	0.00362064	0.999	A
FatherMetal_Lifespan+AttainedAge	6	108984067	rs12196996	0.001723	698000	0.01981	0.01037	0.004451	0.011	0.00978036	0.00378572	0.9167	A
FatherMetal_Lifespan+AttainedAge	6	109279105	rs12195848	0.001765	698000	0.4381	0.002974	0.003835	7.1e-05	0.0130734	0.00332247	0.06831	A
FatherMetal_Lifespan+AttainedAge	6	109295040	rs3734651	0.001729	696000	0.4937	0.00247	0.003609	4.9e-05	0.0123884	0.00309992	0.05345	A
FatherMetal_Lifespan+AttainedAge	6	113554511	rs9481326	0.0003666	698000	0.008635	-0.008536	0.00325	0.0036	-0.00809655	0.00278356	0.9279	A
FatherMetal_Lifespan+AttainedAge	6	113555945	rs9320434	0.001877	698000	0.007438	-0.007102	0.002653	0.029	-0.0048881	0.00227038	0.5769	A
FatherMetal_Lifespan+AttainedAge	6	113560960	rs17074931	0.001737	698000	0.0002571	-0.01299	0.003553	0.19	-0.00411534	0.00304118	0.0793	A
FatherMetal_Lifespan+AttainedAge	6	113923883	rs9400643	0.0005142	698000	0.03338	-0.006116	0.002875	0.0012	-0.00799347	0.00245084	0.653	G
FatherMetal_Lifespan+AttainedAge	6	117708971	rs9489143	0.0007735	698000	0.0005879	-0.01693	0.004924	0.063	-0.00793506	0.00419422	0.2006	G
FatherMetal_Lifespan+AttainedAge	6	119528316	rs909715	0.002144	698000	0.2347	-0.005429	0.004568	0.00046	-0.0139016	0.00399436	0.209	G
FatherMetal_Lifespan+AttainedAge	6	124284365	rs1267993	0.001513	698000	0.0001983	-0.01014	0.002725	0.19	-0.00309079	0.00234247	0.07163	G
FatherMetal_Lifespan+AttainedAge	6	130374102	rs9388768	0.002419	698000	0.1021	0.004429	0.002709	0.0024	0.00707593	0.00231472	0.5025	A
FatherMetal_Lifespan+AttainedAge	6	131422545	rs6915839	0.0003804	698000	0.03083	-0.00561	0.002598	0.00087	-0.00738686	0.00224069	0.6303	G
FatherMetal_Lifespan+AttainedAge	6	134178405	rs9375987	0.0006486	696000	0.1487	-0.003827	0.002651	0.00016	-0.00851568	0.00224442	0.2164	A
FatherMetal_Lifespan+AttainedAge	6	134205092	rs969282	4.061e-05	698000	0.06623	-0.004695	0.002556	8.4e-06	-0.00975835	0.00218612	0.1695	A
FatherMetal_Lifespan+AttainedAge	6	138909661	rs6923972	0.001047	698000	0.002158	0.008327	0.002714	0.038	0.00487571	0.00233705	0.3704	C
FatherMetal_Lifespan+AttainedAge	6	138914474	rs4445072	0.002397	698000	0.0083	0.007574	0.002869	0.035	0.00518487	0.00247196	0.5635	G
FatherMetal_Lifespan+AttainedAge	6	143308879	rs9321880	0.001905	697000	0.01063	-0.00655	0.002564	0.022	-0.00501696	0.00219202	0.6797	G
FatherMetal_Lifespan+AttainedAge	6	143480743	rs6908441	0.0001564	698000	0.001327	0.008749	0.002725	0.007	0.00631234	0.00232713	0.5329	C
FatherMetal_Lifespan+AttainedAge	6	151999091	rs1293940	0.001605	698000	0.007962	0.006747	0.002542	0.023	0.00495055	0.00217781	0.6252	G
FatherMetal_Lifespan+AttainedAge	6	152714446	rs20585	0.0009659	698000	0.03235	-0.005622	0.002627	0.003	-0.00665595	0.00226139	0.7794	C
FatherMetal_Lifespan+AttainedAge	6	152718491	rs550685	0.0005097	697000	0.04041	-0.005297	0.002585	0.00092	-0.00732708	0.00222472	0.5857	G
FatherMetal_Lifespan+AttainedAge	6	152755628	rs215006	0.001274	698000	0.05793	-0.005781	0.003048	0.0021	-0.00806679	0.00263688	0.6084	G
FatherMetal_Lifespan+AttainedAge	6	152766186	rs214993	0.0003682	698000	0.04268	-0.005213	0.002572	0.00053	-0.00768132	0.00221456	0.5133	G
FatherMetal_Lifespan+AttainedAge	6	152766766	rs214992	1.66e-05	698000	0.01362	-0.007449	0.003019	3e-05	-0.0109139	0.00261448	0.4425	A
FatherMetal_Lifespan+AttainedAge	6	152857887	rs2496124	0.0003786	698000	0.06822	-0.005616	0.00308	0.00027	-0.00972132	0.00267488	0.3682	C
FatherMetal_Lifespan+AttainedAge	6	152923465	rs860173	0.001501	698000	0.01519	0.007206	0.002968	0.012	0.00642944	0.00258404	0.8491	C
FatherMetal_Lifespan+AttainedAge	6	152942015	rs6940651	0.00209	698000	0.2803	-0.003858	0.003574	0.0003	-0.0115697	0.00319187	0.162	G
FatherMetal_Lifespan+AttainedAge	6	152963826	rs1830642	0.001051	699000	0.01184	0.007302	0.002901	0.0098	0.00639224	0.00251283	0.8339	G
FatherMetal_Lifespan+AttainedAge	6	152974550	rs2258974	2.789e-05	698000	0.0003164	0.01199	0.003328	0.0032	0.00850906	0.00290683	0.4563	G
FatherMetal_Lifespan+AttainedAge	6	152985508	rs2758767	0.001154	698000	0.1402	-0.004141	0.002807	0.00045	-0.00846821	0.00242838	0.2881	G
FatherMetal_Lifespan+AttainedAge	6	153258346	rs6923712	0.001596	698000	0.08489	0.005341	0.0031	0.0017	0.00832069	0.00266722	0.5041	G
FatherMetal_Lifespan+AttainedAge	6	153333328	rs650018	0.002023	698000	0.05252	-0.004933	0.002544	0.0046	-0.00616499	0.00217367	0.735	A
FatherMetal_Lifespan+AttainedAge	6	160255243	rs9457733	0.001777	696000	0.006551	-0.007931	0.002917	0.03	-0.00537198	0.00247166	0.5477	C
FatherMetal_Lifespan+AttainedAge	6	160443390	rs9456496	0.0009444	698000	0.00691	-0.01085	0.004018	0.014	-0.00842639	0.00336336	0.6791	A
FatherMetal_Lifespan+AttainedAge	6	160465054	rs687088	0.002207	698000	0.004791	0.00773	0.00274	0.048	0.00481445	0.00236449	0.4352	G
FatherMetal_Lifespan+AttainedAge	6	160496817	rs2297361	5.655e-11	697000	6.599e-08	-0.05583	0.01034	1.4e-06	-0.0419811	0.00861787	0.3765	A
FatherMetal_Lifespan+AttainedAge	6	160503656	rs9457827	7.146e-12	698000	2.089e-08	-0.02982	0.005321	3.6e-07	-0.0429948	0.00837737	0.3893	G
FatherMetal_Lifespan+AttainedAge	6	160539046	rs4709399	0.0006331	686000	0.0004271	-0.01026	0.002911	0.06	-0.00456231	0.00247117	0.1745	G
FatherMetal_Lifespan+AttainedAge	6	160541348	rs9457840	1.257e-10	698000	2.824e-06	-0.04841	0.01034	1.1e-07	-0.0466437	0.00869281	0.9233	A
FatherMetal_Lifespan+AttainedAge	6	160551093	rs4646272	3.811e-10	698000	8.802e-08	-0.02819	0.005269	9.2e-06	-0.0202351	0.00456671	0.2832	A
FatherMetal_Lifespan+AttainedAge	6	160570172	rs9295124	0.0003897	697000	0.0218	0.005961	0.002598	0.0014	0.00702518	0.00222843	0.7616	A
FatherMetal_Lifespan+AttainedAge	6	160640494	rs10755577	0.0006042	698000	0.08733	-0.006589	0.003854	0.00037	-0.0113705	0.00322643	0.3525	G
FatherMetal_Lifespan+AttainedAge	6	160682218	rs3127572	4.276e-05	698000	0.00413	-0.01095	0.003818	0.0005	-0.0109761	0.00317074	0.9365	A
FatherMetal_Lifespan+AttainedAge	6	160689558	rs7757336	0.0001506	698000	0.01002	-0.009106	0.003536	0.00097	-0.00981644	0.00297982	0.8615	A
FatherMetal_Lifespan+AttainedAge	6	160751123	im:160751123	5.56e-19	699000	2.01e-12	-0.06592	0.009371	8.3e-12	-0.0540619	0.00783403	0.4154	C
FatherMetal_Lifespan+AttainedAge	6	160759553	im:160759553	5.713e-19	699000	1.692e-12	-0.06583	0.009327	1e-11	-0.0537461	0.00782568	0.397	C
FatherMetal_Lifespan+AttainedAge	6	160760078	rs316174	0.0001841	698000	0.03874	-0.005266	0.002548	0.00022	-0.00800395	0.00217709	0.4463	G
FatherMetal_Lifespan+AttainedAge	6	160771192	rs3120137	3.073e-07	698000	0.0008321	-0.01193	0.00357	4.6e-06	-0.0134014	0.0029509	0.6845	G
FatherMetal_Lifespan+AttainedAge	6	160774928	rs512077	0.0001533	698000	0.0645	-0.006581	0.00356	7.3e-05	-0.012304	0.00307608	0.2822	G
FatherMetal_Lifespan+AttainedAge	6	160776325	rs675162	1.232e-05	698000	0.003425	0.007442	0.002543	0.00012	0.00835365	0.00218007	0.7979	A
FatherMetal_Lifespan+AttainedAge	6	160786342	rs437865	0.001671	697000	0.1176	0.004741	0.003029	0.0011	0.00853582	0.00261181	0.395	A
FatherMetal_Lifespan+AttainedAge	6	160816409	im:160816409	4.731e-19	699000	1.854e-12	-0.06527	0.009265	7.4e-12	-0.0545974	0.00789106	0.4165	T
FatherMetal_Lifespan+AttainedAge	6	160838361	rs3106166	1.081e-05	698000	0.003598	-0.007438	0.002555	9.5e-05	-0.00856365	0.00219935	0.7647	A
FatherMetal_Lifespan+AttainedAge	6	160848167	rs2665357	9.152e-05	698000	0.003033	0.007532	0.002541	0.0018	0.00676412	0.00217664	0.8414	C
FatherMetal_Lifespan+AttainedAge	6	160848743	rs9457925	1.625e-18	698000	4.142e-12	-0.06608	0.009531	1.5e-11	-0.0546584	0.00803269	0.4254	G
FatherMetal_Lifespan+AttainedAge	6	160876290	rs2504926	0.00143	698000	0.01722	0.00616	0.002586	0.01	0.00559373	0.00221941	0.9029	A
FatherMetal_Lifespan+AttainedAge	6	160882029	rs2063347	1.127e-07	697000	0.0004007	-0.009329	0.002636	2.9e-06	-0.0102982	0.0022261	0.7475	G
FatherMetal_Lifespan+AttainedAge	6	160906086	rs3123629	0.0003268	698000	0.02424	-0.006291	0.002792	0.00096	-0.00780946	0.00236864	0.6895	G
FatherMetal_Lifespan+AttainedAge	6	160914460	rs9346818	0.0001661	698000	0.0213	0.005975	0.002595	0.00044	0.0078907	0.00222009	0.6237	G
FatherMetal_Lifespan+AttainedAge	6	160961137	im:160961137	2.284e-19	699000	2.889e-12	-0.06914	0.009901	2.1e-12	-0.0573999	0.00810215	0.5068	T
FatherMetal_Lifespan+AttainedAge	6	160963230	rs11751605	5.599e-07	698000	0.004836	-0.009962	0.003535	9.8e-07	-0.0140773	0.00289826	0.3409	A
FatherMetal_Lifespan+AttainedAge	6	160980330	rs6415084	0.001373	698000	0.005469	-0.00707	0.002545	0.026	-0.00486799	0.00217442	0.5465	G
FatherMetal_Lifespan+AttainedAge	6	160981736	rs9365171	0.0005963	698000	0.01168	0.006693	0.002654	0.0049	0.00651045	0.00228429	0.9391	C
FatherMetal_Lifespan+AttainedAge	6	161013013	im:161013013	1.129e-24	699000	1.844e-13	-0.08049	0.01094	1.1e-17	-0.0767766	0.00894062	0.99	T
FatherMetal_Lifespan+AttainedAge	6	161029728	rs13202636	4.899e-06	698000	0.05116	0.005886	0.003018	4.5e-07	0.0131818	0.00259323	0.1	A
FatherMetal_Lifespan+AttainedAge	6	161069941	rs10945682	7.821e-06	698000	0.012	0.006613	0.002632	1.2e-05	0.00996203	0.00225405	0.3904	G
FatherMetal_Lifespan+AttainedAge	6	161082695	rs1367211	0.002397	698000	0.03682	0.005867	0.00281	0.0088	0.00641739	0.00242491	0.9132	G
FatherMetal_Lifespan+AttainedAge	6	161108536	rs6935921	1.558e-07	698000	0.0003902	0.009861	0.00278	4.6e-06	0.0109312	0.00237836	0.7932	A
FatherMetal_Lifespan+AttainedAge	6	161115245	rs7772437	4.743e-05	692000	0.0002459	-0.009433	0.002573	0.0067	-0.00594746	0.00218127	0.3418	A
FatherMetal_Lifespan+AttainedAge	6	161121958	rs4252050	7.918e-06	693000	0.002797	0.009802	0.003279	8.5e-05	0.0107901	0.00274846	0.8087	A
FatherMetal_Lifespan+AttainedAge	6	161385757	rs7760467	0.001	698000	0.03562	-0.006256	0.002977	0.0028	-0.00764165	0.00254083	0.7495	A
FatherMetal_Lifespan+AttainedAge	6	161386772	rs2099938	0.001371	698000	0.1179	-0.005621	0.003595	0.0008	-0.0105782	0.00311468	0.3637	G
FatherMetal_Lifespan+AttainedAge	6	161521039	rs12528950	0.0006712	698000	0.05535	-0.006333	0.003305	0.00088	-0.00939126	0.00281042	0.5174	A
FatherMetal_Lifespan+AttainedAge	6	161555903	rs3822853	0.002142	698000	0.2004	-0.005369	0.004193	0.00063	-0.0124896	0.00361583	0.2533	G
FatherMetal_Lifespan+AttainedAge	6	161557662	rs3734462	0.0009342	698000	0.08754	-0.005524	0.003233	0.00072	-0.00932393	0.00273763	0.4093	G
FatherMetal_Lifespan+AttainedAge	6	161614799	rs11756131	9.643e-05	698000	0.002394	-0.008376	0.002759	0.0024	-0.00722594	0.00236198	0.7633	G
FatherMetal_Lifespan+AttainedAge	6	161626204	rs9458150	0.002043	698000	0.008765	-0.007297	0.002784	0.028	-0.00535298	0.00238277	0.609	G
FatherMetal_Lifespan+AttainedAge	6	161628111	rs9456641	0.0004538	698000	0.002483	-0.009239	0.003054	0.014	-0.00642756	0.00258525	0.5225	A
FatherMetal_Lifespan+AttainedAge	6	161641480	rs9458157	0.0006814	698000	0.006931	-0.009086	0.003365	0.0095	-0.00755917	0.00286172	0.7411	A
FatherMetal_Lifespan+AttainedAge	6	161646714	rs3798936	3.794e-05	698000	0.02188	-0.01439	0.006276	5e-05	-0.0224896	0.00544451	0.4122	G
FatherMetal_Lifespan+AttainedAge	6	162914986	rs9346917	0.001861	698000	0.06503	0.005007	0.002714	0.0031	0.00684304	0.00232629	0.6334	G
FatherMetal_Lifespan+AttainedAge	6	164007423	rs4709724	0.001734	698000	0.07725	0.004519	0.002557	0.0022	0.00699623	0.00230246	0.5521	G
FatherMetal_Lifespan+AttainedAge	6	164816435	rs12333136	0.001278	698000	0.003732	0.007701	0.002656	0.032	0.0046693	0.00227205	0.4613	A
FatherMetal_Lifespan+AttainedAge	6	170578900	rs7747788	0.001698	698000	0.01515	-0.01076	0.004429	0.014	-0.00927865	0.00380594	0.8232	G
FatherMetal_Lifespan+AttainedAge	7	96163	rs12718079	0.0001762	698000	0.0008756	0.009283	0.00279	0.011	0.00604669	0.00238193	0.4262	G
FatherMetal_Lifespan+AttainedAge	7	149765	rs3814455	0.001733	694000	0.03636	-0.006504	0.003108	0.0058	-0.00737052	0.00267989	0.8594	A
FatherMetal_Lifespan+AttainedAge	7	1039457	rs12701348	0.001185	695000	0.05798	0.005993	0.003161	0.0019	0.00822212	0.0026605	0.6014	G
FatherMetal_Lifespan+AttainedAge	7	1096766	rs1881124	0.0004003	698000	0.03819	0.007026	0.00339	0.0007	0.00967966	0.00287543	0.5638	A
FatherMetal_Lifespan+AttainedAge	7	1141129	rs13242034	0.0001877	698000	0.001874	0.01033	0.003321	0.0065	0.00761348	0.00281429	0.59	G
FatherMetal_Lifespan+AttainedAge	7	1172969	rs13222294	0.0009145	698000	0.009879	0.00826	0.003201	0.0098	0.00701247	0.00273434	0.7996	G
FatherMetal_Lifespan+AttainedAge	7	1583288	rs892523	0.0005034	698000	0.000469	0.008983	0.002568	0.048	0.00437504	0.00219604	0.2112	G
FatherMetal_Lifespan+AttainedAge	7	1813198	rs13245980	0.001669	698000	0.01742	0.007302	0.003071	0.012	0.00655842	0.0026542	0.8764	A
FatherMetal_Lifespan+AttainedAge	7	1821278	rs1881858	0.0007624	698000	0.008743	0.007839	0.00299	0.0088	0.00670094	0.00258582	0.7941	C
FatherMetal_Lifespan+AttainedAge	7	1825304	rs10950371	0.002156	698000	0.02877	0.006454	0.002951	0.01	0.00649729	0.00255971	0.9881	A
FatherMetal_Lifespan+AttainedAge	7	1829899	rs7789703	0.0001327	698000	0.004834	0.008684	0.003082	0.0018	0.00825647	0.00266811	0.9193	A
FatherMetal_Lifespan+AttainedAge	7	1892309	rs11764337	3.49e-05	698000	0.005444	0.00887	0.003191	0.00028	0.0102031	0.0028092	0.8165	G
FatherMetal_Lifespan+AttainedAge	7	1914679	rs4719331	0.0003902	697000	0.005809	0.00889	0.003223	0.0057	0.00796463	0.00286244	0.7846	A
FatherMetal_Lifespan+AttainedAge	7	1962163	rs10268609	0.0003026	698000	0.00248	0.01009	0.003336	0.0089	0.00770339	0.00294506	0.5871	A
FatherMetal_Lifespan+AttainedAge	7	2032803	rs11764590	6.141e-06	693000	0.000568	0.01109	0.003217	0.00033	0.0100348	0.00280048	0.7837	G
FatherMetal_Lifespan+AttainedAge	7	2110346	rs3823624	8.704e-05	698000	0.007229	0.008652	0.003221	0.00068	0.00961385	0.00283419	0.8755	A
FatherMetal_Lifespan+AttainedAge	7	2256802	rs1637732	0.002218	698000	0.06879	0.01917	0.01053	0.0037	0.0296469	0.0101768	0.6447	A
FatherMetal_Lifespan+AttainedAge	7	3147020	rs6943837	0.001683	698000	0.00167	0.00838	0.002666	0.072	0.0040922	0.00226779	0.2669	G
FatherMetal_Lifespan+AttainedAge	7	3531146	rs2141819	0.001149	698000	0.002595	0.00836	0.002775	0.037	0.00499101	0.00239909	0.3961	G
FatherMetal_Lifespan+AttainedAge	7	3547206	rs1522505	5.433e-05	698000	0.0006921	0.01016	0.002996	0.0036	0.00752905	0.00258422	0.5322	A
FatherMetal_Lifespan+AttainedAge	7	3676463	rs10263338	0.0002026	698000	0.01094	0.007346	0.002887	0.0013	0.00796462	0.00248915	0.8835	G
FatherMetal_Lifespan+AttainedAge	7	3713194	rs13223746	0.0004071	697000	0.005708	0.007745	0.002802	0.0061	0.00661299	0.00242118	0.7724	C
FatherMetal_Lifespan+AttainedAge	7	3718051	rs7790719	0.0005133	699000	0.01503	0.006995	0.002877	0.0031	0.00742775	0.00249041	0.9426	G
FatherMetal_Lifespan+AttainedAge	7	5578489	rs7781531	0.001955	698000	0.1358	0.01056	0.007076	0.0011	0.0202873	0.00625939	0.3655	G
FatherMetal_Lifespan+AttainedAge	7	6557135	rs10447683	0.001621	698000	0.009002	-0.006632	0.002539	0.021	-0.00504632	0.00217425	0.6603	C
FatherMetal_Lifespan+AttainedAge	7	6617945	rs7793367	0.0005609	683000	8.016e-05	-0.011	0.002789	0.12	-0.0036544	0.00234661	0.06376	G
FatherMetal_Lifespan+AttainedAge	7	6625847	rs7794450	0.001097	698000	0.001104	-0.008444	0.002588	0.061	-0.00419531	0.00221982	0.2508	A
FatherMetal_Lifespan+AttainedAge	7	6746738	rs9639027	0.001179	698000	0.002159	-0.00846	0.002758	0.043	-0.00484212	0.00237323	0.3553	A
FatherMetal_Lifespan+AttainedAge	7	7368604	rs2077279	0.002493	693000	0.116	0.00576	0.003664	0.0021	0.00969884	0.00316094	0.4684	C
FatherMetal_Lifespan+AttainedAge	7	11118333	rs6971841	0.001032	694000	0.02627	0.009602	0.004321	0.0042	0.0107415	0.00376375	0.8814	A
FatherMetal_Lifespan+AttainedAge	7	12175556	rs6955418	0.001974	698000	0.0001001	0.009897	0.002544	0.3	0.00219891	0.00217617	0.0374	G
FatherMetal_Lifespan+AttainedAge	7	12190364	rs4721050	0.0005817	698000	0.0009477	-0.008449	0.002556	0.036	-0.00452726	0.00219307	0.2958	C
FatherMetal_Lifespan+AttainedAge	7	12227023	rs17149891	0.0002824	695000	0.05328	-0.005841	0.003022	0.00026	-0.00943905	0.00259121	0.4128	A
FatherMetal_Lifespan+AttainedAge	7	12265988	rs6966915	7.73e-05	698000	0.0004276	-0.009064	0.002573	0.0077	-0.00583296	0.00220312	0.3908	G
FatherMetal_Lifespan+AttainedAge	7	12277081	rs10488192	9.641e-05	698000	0.02764	-0.007009	0.003182	0.00014	-0.0104175	0.00272978	0.4634	G
FatherMetal_Lifespan+AttainedAge	7	18975189	rs2240419	0.0003424	698000	0.001514	0.009285	0.002927	0.015	0.00611351	0.00252933	0.4508	G
FatherMetal_Lifespan+AttainedAge	7	18977653	rs1034805	0.00142	698000	0.01197	-0.006767	0.002693	0.014	-0.00573815	0.00231629	0.7778	G
FatherMetal_Lifespan+AttainedAge	7	19036775	rs2023938	0.0004997	696000	0.2635	-0.004763	0.004259	2.9e-05	-0.0153576	0.00363993	0.08867	A
FatherMetal_Lifespan+AttainedAge	7	19040331	rs7792656	0.002003	698000	0.6313	-0.001956	0.004075	2.8e-05	-0.0148428	0.00353572	0.0312	A
FatherMetal_Lifespan+AttainedAge	7	21178262	rs12538434	0.0005639	696000	0.004519	-0.009415	0.003316	0.011	-0.00728324	0.00288063	0.6434	G
FatherMetal_Lifespan+AttainedAge	7	21496496	rs6461566	0.0008983	696000	0.2222	-0.003235	0.00265	0.00012	-0.00871451	0.00225724	0.1521	A
FatherMetal_Lifespan+AttainedAge	7	22082155	rs1636327	0.001188	697000	0.02393	-0.007248	0.00321	0.0056	-0.0075405	0.00275164	0.9377	A
FatherMetal_Lifespan+AttainedAge	7	24549526	rs11976703	0.00117	698000	0.01204	0.01388	0.005527	0.011	0.0125605	0.00495236	0.8175	C
FatherMetal_Lifespan+AttainedAge	7	24713291	rs12700541	0.002228	696000	0.002324	0.0103	0.003383	0.077	0.00497368	0.00292012	0.2861	G
FatherMetal_Lifespan+AttainedAge	7	26517555	rs2214548	0.0005885	698000	0.1319	0.004198	0.002786	0.00017	0.00912703	0.00242046	0.2342	A
FatherMetal_Lifespan+AttainedAge	7	26526960	rs12666574	0.0007059	697000	0.0534	0.005194	0.002689	0.001	0.00769702	0.00232968	0.54	A
FatherMetal_Lifespan+AttainedAge	7	26540727	rs6461948	0.001024	650000	0.021	0.006754	0.002926	0.0053	0.00661942	0.00234718	0.9342	A
FatherMetal_Lifespan+AttainedAge	7	26565535	rs6980196	0.002346	698000	0.06883	0.004736	0.002603	0.004	0.00650055	0.00223867	0.6535	G
FatherMetal_Lifespan+AttainedAge	7	26633643	rs17286978	0.00242	698000	0.004909	0.008476	0.003013	0.052	0.00506704	0.00261682	0.4264	A
FatherMetal_Lifespan+AttainedAge	7	27939039	rs198	0.001475	698000	0.4711	0.002659	0.00369	4.1e-05	0.0129788	0.00315083	0.05276	A
FatherMetal_Lifespan+AttainedAge	7	28715056	rs16874653	0.001596	698000	0.0004356	0.009592	0.002727	0.14	0.00345725	0.00233809	0.1183	A
FatherMetal_Lifespan+AttainedAge	7	31393552	rs6949499	0.002422	698000	0.007078	0.007485	0.002779	0.04	0.00496617	0.00240891	0.518	G
FatherMetal_Lifespan+AttainedAge	7	32866723	rs2392147	0.000558	695000	0.0703	-0.004706	0.0026	0.00047	-0.00769092	0.00220926	0.415	A
FatherMetal_Lifespan+AttainedAge	7	36729951	rs6462691	0.002189	698000	0.02988	0.005548	0.002555	0.0098	0.005669	0.00219586	0.9767	A
FatherMetal_Lifespan+AttainedAge	7	39622353	rs17687978	0.0009685	698000	0.003669	-0.01194	0.004108	0.024	-0.00806664	0.00360165	0.5012	A
FatherMetal_Lifespan+AttainedAge	7	40963295	rs29888	0.001138	698000	0.1224	-0.008308	0.005378	0.00056	-0.0158237	0.00458837	0.3274	A
FatherMetal_Lifespan+AttainedAge	7	54787317	rs11768499	0.001525	698000	0.03678	0.006468	0.003098	0.0048	0.00758304	0.00267759	0.82	A
FatherMetal_Lifespan+AttainedAge	7	54862831	rs6968982	0.001133	699000	0.1379	0.004684	0.003157	0.00045	0.00960164	0.00274038	0.2906	A
FatherMetal_Lifespan+AttainedAge	7	54873006	rs2293589	0.002191	698000	0.1619	0.003627	0.002593	0.00097	0.00732379	0.00222453	0.3218	G
FatherMetal_Lifespan+AttainedAge	7	69329347	rs1014416	0.002392	698000	0.03828	-0.005347	0.002581	0.0084	-0.0057703	0.00222032	0.8966	G
FatherMetal_Lifespan+AttainedAge	7	75309746	rs10247961	0.0003504	698000	0.002099	0.01125	0.003657	0.012	0.00787952	0.00311867	0.5227	G
FatherMetal_Lifespan+AttainedAge	7	75601169	rs6953065	0.0004823	698000	3.061e-05	0.01093	0.002622	0.17	0.00297767	0.00224183	0.03804	G
FatherMetal_Lifespan+AttainedAge	7	75601867	rs17148944	0.0009961	698000	3.901e-06	0.01947	0.004217	0.51	0.00234882	0.00358559	0.004978	G
FatherMetal_Lifespan+AttainedAge	7	75611149	rs10954732	0.003354	698000	6.969e-08	0.01459	0.002706	0.55	-0.00148271	0.00231504	4.269e-05	A
FatherMetal_Lifespan+AttainedAge	7	75612803	im:75612803	0.00018	699000	1.277e-08	0.01608	0.002826	0.73	0.000686329	0.00241605	0.0001856	C
FatherMetal_Lifespan+AttainedAge	7	75616105	rs17685	0.000405	698000	5.414e-08	0.01545	0.002842	0.79	0.000516104	0.00242585	0.0003055	G
FatherMetal_Lifespan+AttainedAge	7	75619650	rs7788926	0.000733	698000	3.79e-07	0.02175	0.004282	0.72	0.00126525	0.00362347	0.0009399	A
FatherMetal_Lifespan+AttainedAge	7	75622281	im:75622281	0.0005463	699000	1.384e-08	0.01635	0.00288	0.94	-0.000325468	0.00246158	6.946e-05	C
FatherMetal_Lifespan+AttainedAge	7	75636240	rs6978677	0.001229	698000	8.031e-08	0.01546	0.002882	0.9	-0.000449922	0.00245968	0.000148	G
FatherMetal_Lifespan+AttainedAge	7	75763624	im:75763624	0.003414	699000	2.638e-09	0.01627	0.002733	0.26	-0.00267327	0.00233464	1.627e-06	G
FatherMetal_Lifespan+AttainedAge	7	75807401	im:75807401	0.001472	699000	1.464e-08	0.01563	0.002759	0.63	-0.00123227	0.00236993	2.52e-05	C
FatherMetal_Lifespan+AttainedAge	7	75810473	im:75810473	0.001279	699000	9.971e-09	0.01581	0.002759	0.63	-0.00124693	0.00237036	2.059e-05	A
FatherMetal_Lifespan+AttainedAge	7	75810542	im:75810542	0.001396	699000	1.266e-08	0.01569	0.002758	0.63	-0.00123916	0.00237036	2.335e-05	A
FatherMetal_Lifespan+AttainedAge	7	75811297	im:75811297	0.001335	699000	1.121e-08	0.01576	0.002759	0.63	-0.00125707	0.00237042	2.19e-05	T
FatherMetal_Lifespan+AttainedAge	7	75812358	im:75812358	0.001359	699000	1.285e-08	0.01569	0.002759	0.64	-0.00122859	0.00237043	2.442e-05	T
FatherMetal_Lifespan+AttainedAge	7	80583482	rs7783868	9.998e-05	695000	0.01509	0.00628	0.002584	0.00034	0.00781638	0.00220727	0.6643	A
FatherMetal_Lifespan+AttainedAge	7	80590518	rs853057	0.001325	698000	0.148	0.003681	0.002545	0.00051	0.00750348	0.00219385	0.2885	G
FatherMetal_Lifespan+AttainedAge	7	81273756	rs4464906	0.0002711	697000	0.02045	-0.007658	0.003304	0.00092	-0.00939391	0.00287019	0.721	A
FatherMetal_Lifespan+AttainedAge	7	81400939	rs3735520	0.002361	698000	0.1124	-0.004065	0.00256	0.002	-0.00674231	0.00220396	0.462	G
FatherMetal_Lifespan+AttainedAge	7	81407080	rs1558001	0.00143	699000	0.01208	0.006468	0.002577	0.014	0.00536507	0.0022168	0.7799	G
FatherMetal_Lifespan+AttainedAge	7	81409040	rs10277195	0.00242	690000	0.1171	-0.004056	0.002588	0.002	-0.00674509	0.00219062	0.4664	C
FatherMetal_Lifespan+AttainedAge	7	81466742	rs17155560	2.306e-05	698000	0.0006617	0.00893	0.002623	0.0014	0.00703244	0.00224399	0.6431	G
FatherMetal_Lifespan+AttainedAge	7	81492276	rs11769657	0.0004373	698000	0.01239	-0.006371	0.002547	0.0031	-0.00643582	0.00218924	0.981	G
FatherMetal_Lifespan+AttainedAge	7	88760360	rs12704439	0.0006609	698000	0.05766	0.005307	0.002796	0.00081	0.00804362	0.002397	0.5004	G
FatherMetal_Lifespan+AttainedAge	7	89397701	rs10272254	0.001767	698000	0.3879	-0.002216	0.002566	0.0001	-0.00862611	0.00220299	0.08679	A
FatherMetal_Lifespan+AttainedAge	7	89432925	rs6465211	0.001378	698000	0.09747	0.004225	0.002549	0.0011	0.00719514	0.00217927	0.4296	A
FatherMetal_Lifespan+AttainedAge	7	89482839	rs2188677	0.001434	698000	0.0761	-0.004713	0.002657	0.0017	-0.0072652	0.00228749	0.5259	A
FatherMetal_Lifespan+AttainedAge	7	89534606	rs7781928	0.0007776	693000	0.0227	-0.006239	0.002738	0.0034	-0.00690176	0.00233675	0.8832	G
FatherMetal_Lifespan+AttainedAge	7	89572966	rs1990395	0.00214	699000	0.006796	-0.006918	0.002556	0.036	-0.00461668	0.00220487	0.5287	A
FatherMetal_Lifespan+AttainedAge	7	89582420	rs6465220	0.001361	698000	0.02293	-0.006566	0.002887	0.007	-0.00648048	0.00245243	0.9799	A
FatherMetal_Lifespan+AttainedAge	7	89611841	rs6959993	0.0004464	698000	0.0007919	-0.009178	0.002735	0.031	-0.00495269	0.00233289	0.2963	G
FatherMetal_Lifespan+AttainedAge	7	94534886	rs1527680	0.001395	698000	0.1473	-0.005466	0.003772	0.00056	-0.0112266	0.00321775	0.2966	A
FatherMetal_Lifespan+AttainedAge	7	94574220	rs10499917	0.000991	699000	0.07708	0.004526	0.00256	0.00096	0.00741993	0.00220142	0.4613	A
FatherMetal_Lifespan+AttainedAge	7	94606271	rs6950265	0.001206	698000	0.01253	0.006839	0.002739	0.011	0.00602837	0.00234626	0.8261	C
FatherMetal_Lifespan+AttainedAge	7	96656572	rs3757493	0.00137	698000	0.001223	0.008301	0.002567	0.071	0.00380929	0.00219794	0.2423	C
FatherMetal_Lifespan+AttainedAge	7	96694302	rs11768581	0.0007237	698000	0.01402	0.006538	0.002661	0.0052	0.00621353	0.0022861	0.9659	G
FatherMetal_Lifespan+AttainedAge	7	97372593	rs10247565	0.001971	694000	0.05508	-0.004898	0.002554	0.0042	-0.0062078	0.00217583	0.7186	C
FatherMetal_Lifespan+AttainedAge	7	98974588	rs6955490	0.001513	698000	0.2678	0.00465	0.004196	0.00019	0.0133244	0.00358192	0.1474	G
FatherMetal_Lifespan+AttainedAge	7	98991944	rs10243678	0.001663	698000	0.1842	0.005136	0.003867	0.00049	0.0115003	0.00329386	0.2504	G
FatherMetal_Lifespan+AttainedAge	7	99032399	rs11973173	0.001717	698000	0.5984	0.002348	0.004458	2.5e-05	0.0158587	0.00377083	0.03251	A
FatherMetal_Lifespan+AttainedAge	7	99054289	rs1043466	7.034e-05	698000	0.1204	0.005515	0.003551	6.1e-06	0.0136557	0.00301041	0.1078	A
FatherMetal_Lifespan+AttainedAge	7	99419226	rs667660	0.0006475	697000	0.002978	0.01486	0.005002	0.018	0.0104632	0.00442386	0.5107	A
FatherMetal_Lifespan+AttainedAge	7	99605588	rs11771331	0.0004318	697000	0.002311	-0.00829	0.002721	0.014	-0.00571343	0.00231018	0.5122	A
FatherMetal_Lifespan+AttainedAge	7	99656927	rs12705070	0.0005062	697000	0.0003479	-0.01014	0.002835	0.057	-0.00464858	0.00240507	0.1767	A
FatherMetal_Lifespan+AttainedAge	7	99703958	rs2293479	0.002239	695000	0.0006712	-0.009532	0.002803	0.15	-0.00351916	0.00239237	0.1308	A
FatherMetal_Lifespan+AttainedAge	7	99736059	rs11771139	0.001127	698000	0.001646	-0.00899	0.002856	0.049	-0.00478628	0.00240865	0.3112	G
FatherMetal_Lifespan+AttainedAge	7	106792332	rs11767623	0.0007815	698000	0.001633	0.01003	0.003184	0.034	0.00565335	0.00269444	0.3556	A
FatherMetal_Lifespan+AttainedAge	7	106792554	rs12705406	0.0006335	698000	0.01339	0.009133	0.003693	0.0046	0.0087384	0.00309024	0.9747	G
FatherMetal_Lifespan+AttainedAge	7	107196723	rs763386	0.0006368	698000	0.003686	0.009754	0.003359	0.015	0.00677727	0.002824	0.5704	A
FatherMetal_Lifespan+AttainedAge	7	107210383	rs11977187	0.002	698000	0.263	-0.003091	0.002761	0.00032	-0.00849254	0.00238498	0.1732	A
FatherMetal_Lifespan+AttainedAge	7	110511038	rs799624	0.002362	698000	0.0001089	-0.009829	0.00254	0.33	-0.00222183	0.00217697	0.03543	G
FatherMetal_Lifespan+AttainedAge	7	110559571	rs259006	0.000158	698000	1.889e-06	-0.01228	0.002577	0.21	-0.00284263	0.00221284	0.01046	C
FatherMetal_Lifespan+AttainedAge	7	110602792	rs7795011	0.0001679	698000	5.686e-06	-0.01189	0.00262	0.15	-0.0032682	0.00225417	0.022	A
FatherMetal_Lifespan+AttainedAge	7	110613685	rs758953	0.0004788	698000	8.075e-06	-0.01203	0.002695	0.27	-0.00263975	0.00232336	0.01473	G
FatherMetal_Lifespan+AttainedAge	7	111228448	rs2528691	0.001217	698000	0.0009382	-0.008409	0.002542	0.074	-0.00392814	0.00217612	0.2179	G
FatherMetal_Lifespan+AttainedAge	7	112978243	rs1524450	0.001333	698000	0.041	0.005238	0.002563	0.0035	0.00638155	0.00219285	0.75	A
FatherMetal_Lifespan+AttainedAge	7	113315926	rs10244620	0.0009957	698000	0.004831	0.00724	0.002569	0.02	0.00520069	0.00220031	0.5678	G
FatherMetal_Lifespan+AttainedAge	7	116928371	rs4727847	9.88e-05	695000	0.004617	0.007251	0.00256	0.0013	0.00704778	0.00218082	0.9504	A
FatherMetal_Lifespan+AttainedAge	7	116943135	rs6947329	0.001582	698000	0.2061	0.003285	0.002598	0.00036	0.00800173	0.00224013	0.2137	G
FatherMetal_Lifespan+AttainedAge	7	117599514	rs916784	8.247e-05	694000	0.004764	-0.007312	0.002591	0.001	-0.00725204	0.00221916	0.9886	A
FatherMetal_Lifespan+AttainedAge	7	117621877	rs7777391	0.0003487	698000	0.03932	0.005418	0.002629	0.00055	0.00773149	0.00224362	0.5323	G
FatherMetal_Lifespan+AttainedAge	7	117631978	rs1859032	0.0002966	698000	0.1131	0.00421	0.002657	7.5e-05	0.00895806	0.00226481	0.2097	A
FatherMetal_Lifespan+AttainedAge	7	121130887	rs10240090	0.0001726	689000	0.04591	0.005244	0.002627	0.00016	0.00859591	0.00226604	0.4065	G
FatherMetal_Lifespan+AttainedAge	7	127931324	rs2122628	0.002188	697000	0.04752	-0.02465	0.01244	0.0058	-0.0305291	0.0110562	0.7931	A
FatherMetal_Lifespan+AttainedAge	7	127939461	rs7778230	0.002293	698000	0.06032	-0.02458	0.01308	0.0046	-0.0321891	0.0113101	0.7027	G
FatherMetal_Lifespan+AttainedAge	7	129637694	rs4731641	0.002283	698000	0.001312	-0.008185	0.002547	0.11	-0.0034418	0.00218058	0.2014	A
FatherMetal_Lifespan+AttainedAge	7	129657882	rs2242487	0.0006061	698000	8.995e-05	-0.01019	0.002603	0.13	-0.00327793	0.0022283	0.06954	G
FatherMetal_Lifespan+AttainedAge	7	129664312	rs1464890	6.27e-05	698000	6.983e-07	-0.01271	0.002562	0.16	-0.00304238	0.00219031	0.009208	G
FatherMetal_Lifespan+AttainedAge	7	129698762	rs13245505	0.0007235	697000	0.000123	-0.01051	0.002737	0.13	-0.00358309	0.00236595	0.07762	A
FatherMetal_Lifespan+AttainedAge	7	130823696	rs4731756	3.072e-05	698000	7.274e-05	-0.01014	0.002555	0.01	-0.00559135	0.00219012	0.2228	G
FatherMetal_Lifespan+AttainedAge	7	130824877	rs2398758	0.0007224	697000	0.003039	0.007627	0.002573	0.02	0.00506683	0.00220464	0.4989	A
FatherMetal_Lifespan+AttainedAge	7	130839735	rs4731759	0.001902	697000	0.01521	0.006265	0.002581	0.016	0.00536667	0.00221336	0.7993	G
FatherMetal_Lifespan+AttainedAge	7	130854175	rs12530892	0.0007345	698000	0.0006447	-0.008786	0.002575	0.057	-0.00427204	0.00220902	0.2167	G
FatherMetal_Lifespan+AttainedAge	7	130897018	rs10954306	0.001811	698000	0.0002775	-0.01067	0.002936	0.19	-0.00323567	0.00251215	0.0816	G
FatherMetal_Lifespan+AttainedAge	7	130903368	rs10240502	7.136e-05	698000	0.0002964	0.009271	0.002562	0.0092	0.00567316	0.00219876	0.3369	A
FatherMetal_Lifespan+AttainedAge	7	131812922	rs281899	0.0008057	698000	0.0614	-0.007341	0.003925	0.00099	-0.0110556	0.00336853	0.5091	G
FatherMetal_Lifespan+AttainedAge	7	134125384	rs969309	0.002388	698000	0.001203	0.01018	0.003144	0.12	0.00422984	0.00266397	0.1866	A
FatherMetal_Lifespan+AttainedAge	7	136913223	rs10256915	0.002025	698000	0.000906	0.008879	0.002676	0.12	0.0036173	0.00229931	0.1688	A
FatherMetal_Lifespan+AttainedAge	7	138977206	rs10954644	0.001186	696000	0.001714	-0.02194	0.006997	0.05	-0.0119265	0.006135	0.3103	G
FatherMetal_Lifespan+AttainedAge	7	145416393	rs850533	0.001802	697000	0.03537	-0.005439	0.002585	0.0063	-0.00617748	0.00224035	0.8725	A
FatherMetal_Lifespan+AttainedAge	7	150703242	rs2853795	0.0007857	698000	0.01123	0.008584	0.003386	0.0072	0.00765429	0.00290246	0.8723	A
FatherMetal_Lifespan+AttainedAge	7	150704843	rs891511	0.002041	694000	0.03204	0.005822	0.002716	0.0083	0.0060583	0.00235436	0.9436	G
FatherMetal_Lifespan+AttainedAge	7	150709571	rs7830	0.0007652	697000	0.0241	0.006063	0.002688	0.0031	0.00680989	0.00234045	0.8487	C
FatherMetal_Lifespan+AttainedAge	7	152735972	rs7798882	0.002303	698000	0.1314	0.004955	0.003284	0.0015	0.00892232	0.00283599	0.4007	G
FatherMetal_Lifespan+AttainedAge	8	1700398	rs7005592	0.002313	698000	0.2372	0.003912	0.003309	0.00051	0.00985524	0.00285642	0.213	G
FatherMetal_Lifespan+AttainedAge	8	1717036	rs11136424	0.002412	698000	0.5793	0.00159	0.002868	5.4e-05	0.00986445	0.00246531	0.04404	A
FatherMetal_Lifespan+AttainedAge	8	1718389	rs6993706	0.0008657	698000	0.2399	0.003846	0.003273	9.3e-05	0.0110181	0.00282477	0.1317	G
FatherMetal_Lifespan+AttainedAge	8	1732756	rs7827285	0.0003602	697000	0.08605	0.005895	0.003434	0.00017	0.0111531	0.00298077	0.2982	A
FatherMetal_Lifespan+AttainedAge	8	1807756	rs7007884	0.0004989	698000	0.0594	-0.005219	0.002768	0.00051	-0.00829206	0.00236232	0.4487	A
FatherMetal_Lifespan+AttainedAge	8	1843091	rs997378	0.0004882	698000	0.3299	0.002569	0.002636	1.5e-05	0.00975765	0.00225244	0.0579	A
FatherMetal_Lifespan+AttainedAge	8	2532368	rs12675592	0.001797	698000	0.005253	-0.007115	0.002549	0.036	-0.00453109	0.00219809	0.4903	A
FatherMetal_Lifespan+AttainedAge	8	3182062	rs149756	0.0009596	694000	0.01025	0.007829	0.003049	0.01	0.0065947	0.00260345	0.7938	A
FatherMetal_Lifespan+AttainedAge	8	3527105	rs1481704	0.001446	698000	0.01226	0.008102	0.003235	0.014	0.00666625	0.00275924	0.7821	G
FatherMetal_Lifespan+AttainedAge	8	3672437	rs1383945	0.001908	698000	0.2283	-0.003171	0.002632	0.0004	-0.00805358	0.00225897	0.2051	C
FatherMetal_Lifespan+AttainedAge	8	5125606	rs10866981	0.001602	697000	0.001866	0.007931	0.00255	0.064	0.00405505	0.00219053	0.2898	C
FatherMetal_Lifespan+AttainedAge	8	5396199	rs2527748	0.001692	698000	0.0002165	-0.01043	0.00282	0.2	-0.00295838	0.00239475	0.07146	C
FatherMetal_Lifespan+AttainedAge	8	5924556	rs4875219	0.002436	698000	0.03716	0.006716	0.003223	0.0089	0.00716876	0.0027497	0.9128	G
FatherMetal_Lifespan+AttainedAge	8	8155475	rs2945891	0.0009158	698000	0.002612	-0.007682	0.002552	0.029	-0.00487103	0.0021957	0.4302	G
FatherMetal_Lifespan+AttainedAge	8	8186167	rs2979208	0.0003112	698000	0.004006	-0.009402	0.003267	0.0061	-0.00795202	0.00285817	0.7147	A
FatherMetal_Lifespan+AttainedAge	8	8188544	rs2979213	0.002186	698000	0.03553	-0.00759	0.003611	0.0081	-0.00850679	0.0031526	0.9076	G
FatherMetal_Lifespan+AttainedAge	8	8310923	rs876954	0.001733	698000	0.01827	-0.006013	0.002548	0.012	-0.00561142	0.00218366	0.8856	G
FatherMetal_Lifespan+AttainedAge	8	8313010	rs2976871	0.001545	698000	0.01979	-0.006207	0.002664	0.0096	-0.00601079	0.00228791	0.9385	C
FatherMetal_Lifespan+AttainedAge	8	8344127	rs2979202	0.001661	698000	0.0147	-0.006293	0.00258	0.014	-0.00550428	0.00221041	0.8158	A
FatherMetal_Lifespan+AttainedAge	8	8374836	rs12546760	0.0006363	698000	0.001766	0.007969	0.002548	0.026	0.00493522	0.00218423	0.3977	A
FatherMetal_Lifespan+AttainedAge	8	8448429	rs13280653	0.0005173	698000	0.01019	0.007766	0.003022	0.0047	0.0073023	0.00257972	0.919	C
FatherMetal_Lifespan+AttainedAge	8	8475558	rs13265046	0.0008746	698000	0.004281	0.009295	0.003254	0.019	0.00649589	0.00275958	0.5562	A
FatherMetal_Lifespan+AttainedAge	8	8487486	rs17682402	0.000841	698000	0.01018	0.007487	0.002914	0.0086	0.00663714	0.00248023	0.825	A
FatherMetal_Lifespan+AttainedAge	8	8543324	rs7011229	0.000291	698000	0.06823	0.004643	0.002546	0.00018	0.00828764	0.00218643	0.3365	A
FatherMetal_Lifespan+AttainedAge	8	8550255	rs11249878	0.001404	697000	0.1227	-0.004257	0.002758	0.00078	-0.00801798	0.00236725	0.3558	A
FatherMetal_Lifespan+AttainedAge	8	8559832	rs9644774	0.000703	695000	0.04414	0.005316	0.002641	0.0013	0.00724666	0.00223009	0.6121	G
FatherMetal_Lifespan+AttainedAge	8	8603182	rs4841026	0.0007387	698000	0.03203	0.005488	0.002559	0.0021	0.00687508	0.00219518	0.7335	G
FatherMetal_Lifespan+AttainedAge	8	8605632	rs4841029	0.0003551	650000	0.03041	0.006108	0.002822	0.00088	0.00750817	0.00221259	0.7445	G
FatherMetal_Lifespan+AttainedAge	8	8613387	rs635594	0.0007382	698000	0.0888	-0.004441	0.00261	0.00049	-0.00789912	0.00224924	0.3725	A
FatherMetal_Lifespan+AttainedAge	8	8641145	rs2428	0.001916	698000	0.08057	-0.00445	0.002547	0.0024	-0.00675068	0.00218585	0.5538	G
FatherMetal_Lifespan+AttainedAge	8	8673601	rs13259216	0.001887	698000	0.04944	-0.005009	0.00255	0.0045	-0.00631062	0.00218402	0.7451	A
FatherMetal_Lifespan+AttainedAge	8	8730488	rs332040	0.002345	698000	0.2215	-0.003119	0.002552	0.0006	-0.00762938	0.00219381	0.2336	G
FatherMetal_Lifespan+AttainedAge	8	8747537	rs399123	0.001631	698000	0.1457	-0.0037	0.002543	0.00073	-0.00748088	0.00220833	0.3179	A
FatherMetal_Lifespan+AttainedAge	8	8808695	rs11785268	0.002367	698000	0.1249	-0.004049	0.002639	0.0017	-0.0071957	0.00226082	0.4233	A
FatherMetal_Lifespan+AttainedAge	8	8890041	rs1045527	0.002121	698000	0.01646	0.006127	0.002555	0.017	0.00532496	0.00218089	0.8061	A
FatherMetal_Lifespan+AttainedAge	8	8911308	rs3989373	0.002425	698000	0.04109	0.005245	0.002568	0.0079	0.00594342	0.00219995	0.8715	C
FatherMetal_Lifespan+AttainedAge	8	8930740	rs10087078	0.0009391	698000	0.2562	0.004006	0.003529	9.2e-05	0.0121516	0.00310601	0.1245	A
FatherMetal_Lifespan+AttainedAge	8	8966972	rs2979248	0.001437	698000	0.005304	0.00718	0.002575	0.028	0.00493993	0.00223398	0.5308	A
FatherMetal_Lifespan+AttainedAge	8	9021026	rs330943	0.000931	698000	0.01393	-0.006659	0.002708	0.0072	-0.00640688	0.00237724	0.9143	G
FatherMetal_Lifespan+AttainedAge	8	9026639	rs378974	9.768e-05	697000	0.003957	-0.007879	0.002734	0.0015	-0.00762372	0.00238771	0.9088	G
FatherMetal_Lifespan+AttainedAge	8	9029413	rs435581	0.001467	698000	0.02164	0.005848	0.002546	0.0082	0.00586402	0.00217911	0.9822	G
FatherMetal_Lifespan+AttainedAge	8	9042454	rs11249905	0.001098	698000	0.001045	-0.008641	0.002636	0.063	-0.00421878	0.00225831	0.2424	A
FatherMetal_Lifespan+AttainedAge	8	9157884	rs330075	0.002312	698000	0.01254	-0.006548	0.002623	0.024	-0.00510269	0.00225433	0.697	A
FatherMetal_Lifespan+AttainedAge	8	9161873	rs330069	0.001338	698000	0.02632	-0.005749	0.002588	0.0059	-0.00614414	0.00222237	0.9235	G
FatherMetal_Lifespan+AttainedAge	8	9165380	rs405001	0.002368	698000	0.1127	0.004035	0.002544	0.002	0.00684871	0.00219552	0.4613	C
FatherMetal_Lifespan+AttainedAge	8	9276163	rs17730481	0.001327	698000	0.005476	-0.007564	0.002723	0.025	-0.00538892	0.00234395	0.5526	G
FatherMetal_Lifespan+AttainedAge	8	9288937	rs17663167	0.002176	698000	0.0244	-0.007706	0.003424	0.012	-0.00750467	0.00293616	0.9458	G
FatherMetal_Lifespan+AttainedAge	8	9328926	rs7007562	0.001968	698000	0.01981	-0.006291	0.0027	0.013	-0.00579564	0.00232027	0.8887	A
FatherMetal_Lifespan+AttainedAge	8	9370559	rs10100760	0.001102	698000	0.2577	0.002922	0.002582	0.00012	0.00853044	0.00222008	0.1336	G
FatherMetal_Lifespan+AttainedAge	8	9555092	rs4841196	0.002229	697000	0.04857	-0.005395	0.002735	0.0058	-0.00642472	0.00233738	0.7889	G
FatherMetal_Lifespan+AttainedAge	8	9818065	rs591346	0.001301	698000	0.02396	-0.005737	0.002541	0.0063	-0.00605387	0.00217373	0.9542	A
FatherMetal_Lifespan+AttainedAge	8	10069485	rs10903321	0.0004418	698000	0.004336	0.007438	0.002607	0.0086	0.00602481	0.00225496	0.6767	C
FatherMetal_Lifespan+AttainedAge	8	10073962	rs4240634	0.000613	698000	0.001501	-0.008522	0.002685	0.028	-0.00517246	0.00230566	0.3706	C
FatherMetal_Lifespan+AttainedAge	8	10086946	rs4240635	0.000553	698000	0.01085	-0.006819	0.002677	0.0048	-0.00663743	0.00230756	0.9276	G
FatherMetal_Lifespan+AttainedAge	8	10149567	rs10903323	0.0002768	698000	0.0007924	-0.01312	0.003909	0.019	-0.00803399	0.00341482	0.3503	A
FatherMetal_Lifespan+AttainedAge	8	10153600	rs11249982	0.0009668	698000	0.001071	-0.01234	0.003773	0.055	-0.00630996	0.00328538	0.2595	A
FatherMetal_Lifespan+AttainedAge	8	10238922	rs11249995	0.0008328	698000	0.002266	-0.007968	0.00261	0.029	-0.00495635	0.0022358	0.4129	A
FatherMetal_Lifespan+AttainedAge	8	10243101	rs6601450	0.001712	698000	0.002253	-0.007804	0.002555	0.061	-0.00415904	0.00219285	0.3153	C
FatherMetal_Lifespan+AttainedAge	8	10286511	rs10429305	0.001201	698000	0.008849	0.007889	0.003014	0.015	0.00625368	0.00260185	0.7118	G
FatherMetal_Lifespan+AttainedAge	8	10295378	rs11996714	0.001578	698000	0.04636	-0.008186	0.004109	0.0038	-0.0106422	0.00363835	0.7349	G
FatherMetal_Lifespan+AttainedAge	8	10315460	rs10102613	0.001763	698000	0.01477	-0.01678	0.006884	0.015	-0.0149134	0.00606831	0.8066	A
FatherMetal_Lifespan+AttainedAge	8	10503525	rs7386213	0.0006875	695000	0.001763	-0.008123	0.002597	0.028	-0.00500586	0.00222902	0.3834	A
FatherMetal_Lifespan+AttainedAge	8	10519285	rs7814795	0.0003358	698000	0.0002166	-0.009464	0.002559	0.051	-0.00433376	0.0021959	0.1602	A
FatherMetal_Lifespan+AttainedAge	8	10579072	rs12544976	2.111e-05	698000	0.007711	-0.006774	0.002542	9.2e-05	-0.00849235	0.0021819	0.6335	A
FatherMetal_Lifespan+AttainedAge	8	10579392	rs4503064	0.0006296	697000	0.002662	-0.007854	0.002614	0.019	-0.00522381	0.00224765	0.4876	G
FatherMetal_Lifespan+AttainedAge	8	10584212	rs10100209	6.186e-06	698000	0.001182	-0.008427	0.002598	0.00016	-0.00855901	0.00224993	0.9935	A
FatherMetal_Lifespan+AttainedAge	8	10595878	rs2409674	4.976e-06	697000	0.0009663	-0.008449	0.00256	0.00015	-0.00838162	0.00219473	0.9677	A
FatherMetal_Lifespan+AttainedAge	8	10605234	rs6601518	8.678e-05	698000	0.01177	0.006461	0.002565	0.00038	0.00780109	0.00220419	0.7147	G
FatherMetal_Lifespan+AttainedAge	8	10621981	rs733396	7.633e-05	698000	0.01468	0.006217	0.002548	0.00024	0.0079466	0.00218438	0.6239	G
FatherMetal_Lifespan+AttainedAge	8	10622812	rs12750	0.0002929	695000	0.01932	0.007158	0.00306	0.0011	0.00831317	0.00256239	0.7585	G
FatherMetal_Lifespan+AttainedAge	8	10626333	rs17774023	0.0001033	698000	0.001393	0.008856	0.002771	0.0042	0.00685654	0.00234719	0.6065	A
FatherMetal_Lifespan+AttainedAge	8	10628947	rs6601521	1.535e-05	698000	0.0002826	-0.009291	0.002559	0.0018	-0.00686277	0.0021977	0.5072	G
FatherMetal_Lifespan+AttainedAge	8	10632684	rs6993841	1.514e-06	698000	1.777e-05	-0.01116	0.002601	0.0012	-0.00719981	0.00223298	0.2921	A
FatherMetal_Lifespan+AttainedAge	8	10647823	rs11250076	1.369e-06	698000	0.0001421	-0.009764	0.002567	0.0002	-0.00825282	0.00220294	0.6689	G
FatherMetal_Lifespan+AttainedAge	8	10666993	rs7002282	4.138e-06	698000	0.0001335	-0.009906	0.002593	0.00076	-0.00755469	0.00223047	0.5174	G
FatherMetal_Lifespan+AttainedAge	8	10718061	rs17777835	0.0002574	698000	0.01031	0.006939	0.002705	0.0019	0.0072404	0.00231084	0.9468	G
FatherMetal_Lifespan+AttainedAge	8	10722058	rs2409676	0.0001621	698000	0.007855	-0.006807	0.002561	0.0014	-0.00710425	0.00220194	0.9564	G
FatherMetal_Lifespan+AttainedAge	8	10726464	rs7840344	3.808e-06	698000	0.0002909	-0.009478	0.002616	0.00035	-0.00813247	0.00225701	0.6984	C
FatherMetal_Lifespan+AttainedAge	8	10729177	rs10095927	6.191e-05	698000	0.02547	0.005694	0.002549	8.2e-05	0.00857486	0.0021884	0.4286	C
FatherMetal_Lifespan+AttainedAge	8	10730558	rs17721866	5.534e-05	693000	0.01502	0.007817	0.003214	0.00015	0.0101722	0.00268176	0.583	A
FatherMetal_Lifespan+AttainedAge	8	10732050	rs2163379	2.213e-06	698000	0.0004118	-0.009236	0.002615	0.00013	-0.0087348	0.00226709	0.8611	C
FatherMetal_Lifespan+AttainedAge	8	10732905	rs1864585	0.0008672	698000	0.006707	0.008021	0.002959	0.013	0.00627632	0.00248501	0.6859	G
FatherMetal_Lifespan+AttainedAge	8	10739903	rs17722117	0.0003085	698000	0.03293	0.008075	0.003786	0.00059	0.0109204	0.00317944	0.5732	G
FatherMetal_Lifespan+AttainedAge	8	10751709	rs1529598	0.0001802	698000	0.007441	0.007311	0.002732	0.0017	0.00737211	0.00232466	0.9925	G
FatherMetal_Lifespan+AttainedAge	8	10761585	rs6985109	0.0001479	698000	0.00659	-0.00692	0.002547	0.0015	-0.00699141	0.0021817	0.9974	A
FatherMetal_Lifespan+AttainedAge	8	10767748	rs4240671	0.0002679	698000	0.007234	0.006842	0.002547	0.0029	0.00656792	0.0021757	0.9266	G
FatherMetal_Lifespan+AttainedAge	8	10781688	rs4841458	0.0002749	698000	0.02207	0.006327	0.002764	0.00085	0.00789661	0.00234698	0.6929	G
FatherMetal_Lifespan+AttainedAge	8	10788875	rs11783247	0.0009895	697000	0.005086	-0.007175	0.002561	0.019	-0.00519154	0.00218673	0.5802	A
FatherMetal_Lifespan+AttainedAge	8	10804843	rs7000276	0.0008138	697000	0.02272	0.005947	0.002611	0.0036	0.00657805	0.00224025	0.8824	G
FatherMetal_Lifespan+AttainedAge	8	10819854	rs4841465	0.0001525	698000	0.00518	-0.007121	0.002547	0.002	-0.00678907	0.00217894	0.9184	A
FatherMetal_Lifespan+AttainedAge	8	10836436	rs6996943	0.002027	698000	0.02431	-0.005736	0.002547	0.011	-0.00567336	0.00219903	0.9587	G
FatherMetal_Lifespan+AttainedAge	8	10942742	rs13248264	0.000764	696000	0.004054	0.008188	0.002849	0.017	0.00571737	0.00239998	0.5622	G
FatherMetal_Lifespan+AttainedAge	8	10965442	rs7832722	0.000171	698000	0.00153	0.00823	0.002597	0.0069	0.00603069	0.00221065	0.5534	G
FatherMetal_Lifespan+AttainedAge	8	10998445	rs7845493	0.001677	699000	0.0496	0.008391	0.004274	0.0038	0.0103611	0.0035858	0.7196	A
FatherMetal_Lifespan+AttainedAge	8	11002093	rs6986002	0.0009645	698000	0.02769	0.005622	0.002553	0.0036	0.00631657	0.00217693	0.8385	G
FatherMetal_Lifespan+AttainedAge	8	11012977	rs2409718	0.001453	698000	0.008722	-0.006683	0.002548	0.019	-0.00519691	0.00218218	0.6713	A
FatherMetal_Lifespan+AttainedAge	8	11037034	rs11250119	0.0006132	698000	0.001428	0.008152	0.002556	0.029	0.00485469	0.00218293	0.3613	G
FatherMetal_Lifespan+AttainedAge	8	11072549	rs2409744	0.001763	698000	0.02711	0.009512	0.004304	0.0082	0.00942585	0.00358616	0.9701	G
FatherMetal_Lifespan+AttainedAge	8	11073578	rs6601569	0.0007065	698000	0.008652	-0.006707	0.002555	0.0081	-0.00587918	0.0021947	0.805	A
FatherMetal_Lifespan+AttainedAge	8	11076635	rs2409745	0.001744	698000	0.0119	-0.006416	0.002551	0.018	-0.00527278	0.00218414	0.7351	C
FatherMetal_Lifespan+AttainedAge	8	11094751	rs6601573	0.001509	698000	0.0001225	-0.0099	0.002577	0.23	-0.00274377	0.00221066	0.05121	G
FatherMetal_Lifespan+AttainedAge	8	11096054	rs11774569	0.0002433	699000	0.0006059	0.009056	0.002641	0.02	0.00523225	0.00225023	0.3201	A
FatherMetal_Lifespan+AttainedAge	8	11097804	rs6601575	0.00181	698000	0.0006364	-0.008723	0.002554	0.13	-0.00342242	0.00219715	0.1422	A
FatherMetal_Lifespan+AttainedAge	8	11101723	rs2572432	0.0004723	698000	0.0009575	0.008791	0.002662	0.029	0.0050954	0.00228617	0.3213	A
FatherMetal_Lifespan+AttainedAge	8	11110503	rs2082775	2.023e-05	698000	0.0008111	0.01083	0.003235	0.001	0.00914341	0.00277646	0.7132	C
FatherMetal_Lifespan+AttainedAge	8	11113828	rs2736374	8.252e-05	698000	0.0009956	0.008547	0.002596	0.0043	0.00640531	0.00222186	0.5585	A
FatherMetal_Lifespan+AttainedAge	8	11116661	rs17728678	0.0007911	698000	0.007176	0.008032	0.002988	0.011	0.00653061	0.00255323	0.724	A
FatherMetal_Lifespan+AttainedAge	8	11118983	rs10503418	0.001953	697000	0.004635	-0.007319	0.002585	0.043	-0.00458976	0.00221319	0.4447	A
FatherMetal_Lifespan+AttainedAge	8	11135974	rs7004362	0.001624	698000	0.004052	-0.007405	0.002576	0.039	-0.00464498	0.00221038	0.4438	A
FatherMetal_Lifespan+AttainedAge	8	11157371	rs2736387	0.0001465	698000	0.003241	0.007526	0.002556	0.003	0.00649274	0.00218259	0.7808	C
FatherMetal_Lifespan+AttainedAge	8	11258378	rs4841526	0.001975	696000	0.05309	-0.005042	0.002607	0.0044	-0.0063458	0.0022241	0.7296	A
FatherMetal_Lifespan+AttainedAge	8	11278146	rs11250135	0.000851	697000	0.06052	-0.00486	0.00259	0.0011	-0.00726425	0.00222697	0.5259	C
FatherMetal_Lifespan+AttainedAge	8	11281273	rs2409764	0.0001096	699000	0.0006523	0.00874	0.002564	0.0082	0.00585722	0.00221313	0.4285	A
FatherMetal_Lifespan+AttainedAge	8	11286146	rs7844834	0.0001491	698000	0.0001174	0.01055	0.00274	0.034	0.00497103	0.00233148	0.1584	C
FatherMetal_Lifespan+AttainedAge	8	11289685	rs12115021	0.002064	698000	0.000223	0.01218	0.0033	0.23	0.00341091	0.00279739	0.06497	A
FatherMetal_Lifespan+AttainedAge	8	11295925	rs3021517	0.001072	698000	0.0002968	0.01135	0.003136	0.12	0.00415202	0.00264234	0.1127	A
FatherMetal_Lifespan+AttainedAge	8	11359557	rs2409781	0.0004181	692000	0.008701	-0.007707	0.002937	0.0042	-0.0072398	0.00251367	0.8909	A
FatherMetal_Lifespan+AttainedAge	8	11394233	rs17153419	0.0006978	696000	0.003088	-0.008284	0.0028	0.019	-0.00577676	0.00241253	0.5076	A
FatherMetal_Lifespan+AttainedAge	8	11425077	rs4841562	0.001458	698000	0.01462	-0.00638	0.002613	0.012	-0.00577505	0.00224636	0.8414	G
FatherMetal_Lifespan+AttainedAge	8	11433909	rs2898290	0.0007401	698000	0.004202	-0.007289	0.002546	0.016	-0.00537877	0.00218519	0.5803	G
FatherMetal_Lifespan+AttainedAge	8	11434929	rs2127128	0.0002425	693000	0.0005876	-0.009384	0.00273	0.02	-0.00555608	0.00233664	0.3096	A
FatherMetal_Lifespan+AttainedAge	8	11439225	rs12677326	0.0006703	698000	0.00293	-0.008229	0.002766	0.019	-0.00568152	0.0023838	0.5037	G
FatherMetal_Lifespan+AttainedAge	8	11444516	rs10097870	0.001537	698000	0.006126	-0.006984	0.002548	0.027	-0.00494712	0.00218823	0.558	G
FatherMetal_Lifespan+AttainedAge	8	11448529	rs1478892	0.0004715	698000	0.001756	-0.008305	0.002654	0.019	-0.00549036	0.00228758	0.4384	C
FatherMetal_Lifespan+AttainedAge	8	11463015	rs17807624	0.0002978	698000	0.001236	-0.008676	0.002686	0.015	-0.00575701	0.00231103	0.4273	G
FatherMetal_Lifespan+AttainedAge	8	11595969	rs2898295	0.001457	698000	0.009317	0.006625	0.002548	0.018	0.00531675	0.00217724	0.691	G
FatherMetal_Lifespan+AttainedAge	8	11828200	rs4841659	0.001866	698000	0.008457	-0.006701	0.002545	0.026	-0.00499072	0.00218288	0.6152	G
FatherMetal_Lifespan+AttainedAge	8	11843758	rs4841662	0.0004018	698000	0.002302	-0.007747	0.002542	0.013	-0.0055939	0.0021884	0.5241	G
FatherMetal_Lifespan+AttainedAge	8	11851998	rs12542040	5.08e-05	698000	0.004099	0.007342	0.002558	0.00063	0.00754807	0.00218657	0.9671	G
FatherMetal_Lifespan+AttainedAge	8	11853596	rs11250186	0.002013	698000	0.001687	0.008066	0.002568	0.085	0.00387972	0.00219742	0.2487	G
FatherMetal_Lifespan+AttainedAge	8	11857317	rs6601649	0.002002	697000	0.001846	0.007982	0.002563	0.08	0.00397096	0.00219891	0.2624	A
FatherMetal_Lifespan+AttainedAge	8	13282821	rs370730	0.001608	698000	0.02634	0.005666	0.002551	0.0075	0.00578005	0.00217998	0.9609	G
FatherMetal_Lifespan+AttainedAge	8	15024850	rs2410233	0.0004867	698000	0.01031	0.007968	0.003106	0.0043	0.00751932	0.00267718	0.9329	C
FatherMetal_Lifespan+AttainedAge	8	15037929	rs17609949	0.00106	698000	0.002593	0.009175	0.003046	0.034	0.00541467	0.00262063	0.407	A
FatherMetal_Lifespan+AttainedAge	8	15057078	rs17656261	0.0006508	698000	0.000642	0.01012	0.002964	0.051	0.00488782	0.00255524	0.2276	G
FatherMetal_Lifespan+AttainedAge	8	17728689	rs2276473	0.001439	698000	0.001958	0.009257	0.002989	0.056	0.00486036	0.00257246	0.3117	C
FatherMetal_Lifespan+AttainedAge	8	17851248	rs429633	0.002242	692000	0.002074	0.008243	0.002677	0.082	0.00399161	0.00228722	0.264	A
FatherMetal_Lifespan+AttainedAge	8	17948298	rs17126209	0.001275	698000	0.0001884	0.01524	0.004081	0.17	0.00488814	0.00351622	0.07617	A
FatherMetal_Lifespan+AttainedAge	8	19746876	rs17482310	0.001355	698000	0.04723	0.006634	0.003343	0.003	0.00842251	0.0028577	0.6981	C
FatherMetal_Lifespan+AttainedAge	8	19776981	rs4466415	3.272e-05	698000	0.002108	0.0111	0.003609	0.00072	0.0105503	0.00315463	0.9023	A
FatherMetal_Lifespan+AttainedAge	8	19786891	rs7816032	0.0001547	698000	0.01302	0.007421	0.002989	0.00074	0.00853384	0.00255756	0.7769	G
FatherMetal_Lifespan+AttainedAge	8	19799641	rs1534649	9.824e-05	698000	0.003737	0.007415	0.002557	0.0016	0.00687909	0.00219924	0.891	C
FatherMetal_Lifespan+AttainedAge	8	19810787	rs343	0.0004166	697000	0.01168	0.0117	0.004641	0.0031	0.0117635	0.00398277	0.9959	C
FatherMetal_Lifespan+AttainedAge	8	19811417	rs253	0.0003546	698000	0.008763	0.006694	0.002554	0.0034	0.00647885	0.0022206	0.9391	G
FatherMetal_Lifespan+AttainedAge	8	19811967	rs256	4.08e-05	698000	0.0199	0.008486	0.003645	6.4e-05	0.0124869	0.00314574	0.4464	G
FatherMetal_Lifespan+AttainedAge	8	19818436	rs316	0.0005815	698000	0.00473	0.01094	0.003874	0.011	0.00828581	0.00331266	0.6544	C
FatherMetal_Lifespan+AttainedAge	8	19819536	rs327	1.053e-08	698000	2.017e-05	0.01213	0.002846	3.6e-06	0.0112489	0.00243714	0.839	A
FatherMetal_Lifespan+AttainedAge	8	19823617	rs11570892	0.000625	699000	0.001722	0.01099	0.003505	0.026	0.006553	0.00298815	0.3955	A
FatherMetal_Lifespan+AttainedAge	8	19824667	rs15285	8.455e-10	696000	2.439e-05	0.01188	0.002814	1.2e-07	0.0126518	0.00240996	0.8337	G
FatherMetal_Lifespan+AttainedAge	8	19856539	rs4523270	1.487e-07	697000	0.0003922	0.009933	0.002802	4.3e-06	0.0109298	0.00239245	0.7875	A
FatherMetal_Lifespan+AttainedAge	8	19875100	rs2410630	5.016e-07	698000	8.922e-05	0.01004	0.002563	9.3e-05	0.00854228	0.00219238	0.6933	G
FatherMetal_Lifespan+AttainedAge	8	19878154	rs1534650	0.0003243	698000	0.02156	-0.006515	0.002835	0.0011	-0.00786475	0.0024193	0.7292	G
FatherMetal_Lifespan+AttainedAge	8	19889125	rs2178296	3.157e-05	698000	0.00814	0.006763	0.002556	0.00015	0.00827852	0.00218821	0.676	C
FatherMetal_Lifespan+AttainedAge	8	19899046	rs4244457	6.777e-05	698000	0.02286	-0.006187	0.002719	0.00011	-0.00905188	0.00231949	0.472	A
FatherMetal_Lifespan+AttainedAge	8	19907912	rs11991231	2.032e-06	698000	0.005279	0.01152	0.004131	5.6e-06	0.0160858	0.0035578	0.4449	A
FatherMetal_Lifespan+AttainedAge	8	19941448	rs6989064	0.0001478	698000	0.02186	-0.005856	0.002554	0.00036	-0.00785559	0.00218374	0.5961	A
FatherMetal_Lifespan+AttainedAge	8	19943308	rs13276972	0.0007448	698000	0.08956	-0.004427	0.002608	0.00049	-0.00787182	0.00224216	0.3711	G
FatherMetal_Lifespan+AttainedAge	8	20532503	rs11990986	0.002483	698000	0.1308	0.00409	0.002707	0.0017	0.00729862	0.00231511	0.4143	G
FatherMetal_Lifespan+AttainedAge	8	21199381	rs2125649	0.001777	698000	0.06668	0.007238	0.003947	0.0028	0.0101316	0.00338272	0.6137	A
FatherMetal_Lifespan+AttainedAge	8	21766101	rs17581764	0.001066	698000	8.781e-06	0.01699	0.003821	0.43	0.00237944	0.003258	0.008995	G
FatherMetal_Lifespan+AttainedAge	8	21773384	rs11783414	0.001536	698000	0.00151	-0.008063	0.002541	0.07	-0.00384165	0.00217676	0.2614	A
FatherMetal_Lifespan+AttainedAge	8	21833965	rs2306641	0.0003795	698000	2.326e-06	0.01212	0.002567	0.34	0.00203138	0.00219394	0.006794	G
FatherMetal_Lifespan+AttainedAge	8	23397393	rs4872144	0.002243	698000	0.01202	-0.007432	0.002959	0.024	-0.00569856	0.00254438	0.6881	A
FatherMetal_Lifespan+AttainedAge	8	25522134	rs17801625	0.00239	698000	0.01251	0.008213	0.003288	0.025	0.00622525	0.00280514	0.6895	A
FatherMetal_Lifespan+AttainedAge	8	26405024	rs13279683	0.001247	698000	0.02061	0.00593	0.002562	0.007	0.0058425	0.00218717	0.998	G
FatherMetal_Lifespan+AttainedAge	8	26665587	rs7816340	0.0004969	697000	0.05318	0.00784	0.004055	0.0006	0.0118524	0.00352435	0.4866	A
FatherMetal_Lifespan+AttainedAge	8	27120575	rs1867887	0.002251	697000	0.01779	0.009869	0.004164	0.017	0.00864428	0.00362307	0.8204	A
FatherMetal_Lifespan+AttainedAge	8	27156502	rs2292979	3.12e-05	698000	0.001284	0.01524	0.004734	0.0011	0.0133087	0.00409732	0.77	A
FatherMetal_Lifespan+AttainedAge	8	27319905	rs11778371	2.24e-06	698000	0.0004934	0.01863	0.005345	0.00011	0.0182681	0.00468369	0.9062	G
FatherMetal_Lifespan+AttainedAge	8	27334969	rs2741339	0.000222	698000	0.004569	0.008174	0.002882	0.0036	0.00728594	0.00249304	0.8136	A
FatherMetal_Lifespan+AttainedAge	8	27336978	rs2565059	1.955e-06	698000	0.0002252	0.0118	0.003199	0.0002	0.0102651	0.00274658	0.7281	G
FatherMetal_Lifespan+AttainedAge	8	27337380	rs2565055	5.746e-05	650000	0.001868	0.01013	0.003257	0.0015	0.00826521	0.00259006	0.6611	C
FatherMetal_Lifespan+AttainedAge	8	27337791	rs2741335	0.0001942	697000	0.009745	0.007531	0.002914	0.0014	0.00807542	0.00252794	0.9175	A
FatherMetal_Lifespan+AttainedAge	8	27344719	rs11780471	3.239e-08	697000	1.759e-05	0.02224	0.005181	1.6e-05	0.0193807	0.00447518	0.6758	G
FatherMetal_Lifespan+AttainedAge	8	27405576	rs2640727	0.0001247	698000	0.00383	0.007519	0.0026	0.0021	0.00694156	0.00227246	0.8595	A
FatherMetal_Lifespan+AttainedAge	8	27405809	rs2640726	0.0001417	698000	0.00183	0.008205	0.002633	0.0048	0.0063237	0.00226337	0.6279	G
FatherMetal_Lifespan+AttainedAge	8	27417422	rs1873933	5.664e-05	698000	0.003969	0.007339	0.002548	0.00075	0.00730196	0.00218573	0.9973	A
FatherMetal_Lifespan+AttainedAge	8	27418747	rs11780592	8.26e-07	698000	0.0002324	0.0122	0.003315	6.8e-05	0.011266	0.00282583	0.8529	A
FatherMetal_Lifespan+AttainedAge	8	27420782	rs2741348	0.0001376	698000	0.02026	0.005991	0.002581	0.00036	0.00785677	0.00222122	0.6097	C
FatherMetal_Lifespan+AttainedAge	8	27429228	rs1316801	2.797e-05	698000	0.06925	0.004691	0.002582	4.2e-06	0.0101988	0.00222168	0.1405	G
FatherMetal_Lifespan+AttainedAge	8	27441010	rs7828131	1.945e-05	698000	0.02596	0.005813	0.002611	1.4e-05	0.00975995	0.00224919	0.2995	A
FatherMetal_Lifespan+AttainedAge	8	27442064	rs7844965	5.791e-10	698000	9.057e-06	0.01335	0.003008	2.2e-07	0.0134606	0.00258847	0.9983	G
FatherMetal_Lifespan+AttainedAge	8	27448729	rs7012010	2.097e-05	698000	0.001454	0.008976	0.002819	0.0006	0.00826819	0.00241588	0.8666	A
FatherMetal_Lifespan+AttainedAge	8	27450073	rs17057438	8.515e-05	698000	0.002476	0.008306	0.002745	0.002	0.00723616	0.00235524	0.7929	G
FatherMetal_Lifespan+AttainedAge	8	27455442	rs3087554	0.001977	691000	0.05763	-0.006558	0.003454	0.004	-0.00849097	0.00291553	0.7076	A
FatherMetal_Lifespan+AttainedAge	8	29223864	rs10108738	0.0004352	650000	0.01219	0.01011	0.004035	0.0031	0.00963995	0.00322437	0.8983	A
FatherMetal_Lifespan+AttainedAge	8	29228241	rs10097270	4.325e-05	696000	0.0001424	0.01185	0.003116	0.009	0.00718809	0.00270679	0.2749	G
FatherMetal_Lifespan+AttainedAge	8	29250546	rs601962	0.002355	698000	0.006789	0.00753	0.002781	0.04	0.00512634	0.0024152	0.5117	G
FatherMetal_Lifespan+AttainedAge	8	30820305	rs17647942	0.001122	698000	0.0001484	0.01132	0.002984	0.17	0.00349929	0.00259546	0.06944	G
FatherMetal_Lifespan+AttainedAge	8	30854033	rs2725371	0.0008417	698000	0.0116	-0.006946	0.002752	0.0076	-0.00620274	0.00237438	0.8702	G
FatherMetal_Lifespan+AttainedAge	8	30856464	rs1362910	0.001401	698000	0.002176	-0.007886	0.002573	0.051	-0.00425381	0.00220982	0.3343	G
FatherMetal_Lifespan+AttainedAge	8	30900890	rs4733220	0.0009713	698000	0.005705	-0.007143	0.002584	0.017	-0.00519921	0.00221861	0.6184	G
FatherMetal_Lifespan+AttainedAge	8	31959943	rs1542517	0.0006435	697000	0.01211	-0.01384	0.005516	0.0052	-0.0131584	0.00470226	0.9342	G
FatherMetal_Lifespan+AttainedAge	8	32121424	rs16879067	0.002473	698000	0.05455	-0.006104	0.003175	0.0058	-0.00752301	0.00272217	0.7591	G
FatherMetal_Lifespan+AttainedAge	8	36628405	rs17305805	0.0007079	698000	0.0729	0.00611	0.003407	0.00063	0.0101085	0.00293501	0.4308	C
FatherMetal_Lifespan+AttainedAge	8	39628986	rs202006	0.0007827	695000	0.02878	-0.008091	0.003701	0.0026	-0.00953715	0.00317631	0.7912	A
FatherMetal_Lifespan+AttainedAge	8	39727430	rs6988758	0.0004059	698000	0.0001887	0.01492	0.003997	0.065	0.00619109	0.00342798	0.1354	A
FatherMetal_Lifespan+AttainedAge	8	42548239	rs1530847	6.075e-05	697000	0.007734	0.009136	0.00343	0.00039	0.0103008	0.00290869	0.797	A
FatherMetal_Lifespan+AttainedAge	8	42552908	rs1530848	0.002479	698000	0.02299	0.006868	0.003021	0.015	0.00630483	0.00259871	0.8946	A
FatherMetal_Lifespan+AttainedAge	8	42604791	rs6982753	0.001621	698000	0.08609	0.005486	0.003196	0.0017	0.00871935	0.00274778	0.5	A
FatherMetal_Lifespan+AttainedAge	8	54115304	rs1425898	0.001635	698000	0.02561	-0.00593	0.002657	0.0079	-0.0065632	0.00248771	0.9752	G
FatherMetal_Lifespan+AttainedAge	8	58394712	rs1451151	0.0008009	698000	0.01167	-0.006688	0.002652	0.0071	-0.00604685	0.0022708	0.8804	A
FatherMetal_Lifespan+AttainedAge	8	59803719	rs7845800	7.842e-05	698000	0.004706	-0.007315	0.002588	0.00095	-0.00722084	0.00221501	0.9963	A
FatherMetal_Lifespan+AttainedAge	8	59813809	rs13252116	0.0002825	696000	0.3047	0.006028	0.005872	7.1e-06	0.0238051	0.00525007	0.05118	G
FatherMetal_Lifespan+AttainedAge	8	59840108	rs7815098	6.246e-05	698000	0.05721	0.009309	0.004895	2.2e-05	0.0185301	0.00433958	0.2289	G
FatherMetal_Lifespan+AttainedAge	8	59867483	rs1448547	0.0001443	698000	0.006826	-0.007306	0.002701	0.0014	-0.0071632	0.00229296	0.9819	G
FatherMetal_Lifespan+AttainedAge	8	59872177	rs1947178	0.001901	698000	0.145	0.004439	0.003045	0.00094	0.00866713	0.00262123	0.3396	G
FatherMetal_Lifespan+AttainedAge	8	59873636	rs1463140	0.0004294	698000	0.009474	0.006657	0.002566	0.004	0.00629105	0.00220024	0.9295	G
FatherMetal_Lifespan+AttainedAge	8	59887499	rs10108787	0.0007274	698000	0.1088	0.005549	0.00346	0.00034	0.0109052	0.0030437	0.3096	C
FatherMetal_Lifespan+AttainedAge	8	61330269	rs13438846	8.988e-05	699000	5.694e-05	0.0134	0.003329	0.032	0.00594845	0.00281861	0.1296	G
FatherMetal_Lifespan+AttainedAge	8	62840483	rs7008487	0.001781	698000	0.04809	0.005037	0.002548	0.0043	0.00615324	0.00220043	0.7455	A
FatherMetal_Lifespan+AttainedAge	8	66556187	rs10504389	0.002097	698000	1.973e-05	0.01514	0.003546	0.51	0.00214284	0.00305692	0.01026	G
FatherMetal_Lifespan+AttainedAge	8	69693543	rs2953950	0.0006699	698000	0.002563	-0.007932	0.00263	0.021	-0.0052329	0.00226216	0.4719	C
FatherMetal_Lifespan+AttainedAge	8	70001951	rs2472130	0.001055	697000	0.02808	-0.006	0.002732	0.004	-0.00663403	0.00232016	0.8545	G
FatherMetal_Lifespan+AttainedAge	8	73582738	rs2246456	0.001802	698000	0.1416	-0.004189	0.00285	0.0009	-0.0082038	0.00248453	0.3402	C
FatherMetal_Lifespan+AttainedAge	8	74052613	rs10504547	0.00154	697000	0.03932	0.007857	0.003813	0.0045	0.00932415	0.00330318	0.7981	A
FatherMetal_Lifespan+AttainedAge	8	74143490	rs2605879	0.001316	698000	0.6344	0.00153	0.003217	1.2e-05	0.0122515	0.00281511	0.02322	G
FatherMetal_Lifespan+AttainedAge	8	78124431	rs17380635	0.001125	698000	0.1525	0.00619	0.004326	0.00037	0.0131666	0.00369765	0.261	C
FatherMetal_Lifespan+AttainedAge	8	78192352	rs4298474	0.0001923	698000	0.1343	0.005664	0.003782	2.6e-05	0.0138878	0.00329061	0.1444	G
FatherMetal_Lifespan+AttainedAge	8	78245535	rs12674542	0.001983	698000	0.119	0.00554	0.003554	0.0014	0.00975165	0.00305649	0.4143	G
FatherMetal_Lifespan+AttainedAge	8	87562330	rs7823951	0.0002915	650000	0.02556	-0.009537	0.004271	0.00083	-0.0112065	0.00328256	0.7747	A
FatherMetal_Lifespan+AttainedAge	8	95107477	rs2513764	0.0006688	697000	0.0002382	0.02425	0.0066	0.089	0.00994297	0.00584529	0.1234	A
FatherMetal_Lifespan+AttainedAge	8	97366701	rs6997395	0.001057	698000	0.004657	-0.007781	0.00275	0.022	-0.00531854	0.00234636	0.548	A
FatherMetal_Lifespan+AttainedAge	8	97402724	rs750500	0.0004626	698000	0.00925	-0.006976	0.00268	0.0045	-0.00645654	0.00228297	0.9073	G
FatherMetal_Lifespan+AttainedAge	8	103054644	rs1893533	0.0002021	698000	0.000767	-0.008703	0.002587	0.014	-0.00543799	0.00220675	0.3827	A
FatherMetal_Lifespan+AttainedAge	8	107323253	rs1587737	0.0008846	698000	0.0007785	0.01647	0.004902	0.061	0.00781926	0.00419144	0.2239	G
FatherMetal_Lifespan+AttainedAge	8	116405191	rs231173	0.001845	698000	0.03902	0.005484	0.002657	0.0058	0.00625721	0.00231134	0.8347	G
FatherMetal_Lifespan+AttainedAge	8	123615949	rs7846496	0.0006702	698000	0.01105	-0.01087	0.004278	0.006	-0.00982167	0.00362371	0.8973	G
FatherMetal_Lifespan+AttainedAge	8	126470817	rs4518686	0.0001616	698000	0.003957	-0.007476	0.002594	0.0028	-0.00669148	0.00222323	0.8247	A
FatherMetal_Lifespan+AttainedAge	8	126473441	rs10956248	0.001645	698000	0.02434	-0.006036	0.002681	0.0084	-0.0061698	0.00230085	0.9958	G
FatherMetal_Lifespan+AttainedAge	8	126479362	rs6982502	9.112e-05	697000	0.001733	-0.007978	0.002547	0.003	-0.00652322	0.00217693	0.6803	A
FatherMetal_Lifespan+AttainedAge	8	126481694	rs2980876	0.0009714	698000	0.04331	-0.005531	0.002737	0.0021	-0.00715818	0.00234043	0.6705	A
FatherMetal_Lifespan+AttainedAge	8	126495818	rs10808546	1.404e-05	698000	0.0001231	0.009841	0.002563	0.0031	0.00648625	0.00219404	0.3643	G
FatherMetal_Lifespan+AttainedAge	8	126516988	rs4512391	0.002185	698000	0.2575	-0.003019	0.002666	0.00039	-0.0081579	0.00229397	0.1862	A
FatherMetal_Lifespan+AttainedAge	8	128991152	rs13270017	0.001489	695000	0.05866	0.007319	0.003871	0.0026	0.00973577	0.00323355	0.639	C
FatherMetal_Lifespan+AttainedAge	8	132862920	rs6999964	0.002083	698000	0.0006051	-0.011	0.003206	0.15	-0.0040558	0.00277275	0.128	G
FatherMetal_Lifespan+AttainedAge	8	132899760	rs16904543	0.002151	697000	0.003659	-0.01119	0.00385	0.056	-0.0062421	0.0033351	0.3779	G
FatherMetal_Lifespan+AttainedAge	8	133487525	rs2167171	0.002197	698000	0.0001829	0.01715	0.004583	0.26	0.00425791	0.00395758	0.05427	A
FatherMetal_Lifespan+AttainedAge	8	133536338	rs13266648	0.002321	699000	0.002932	0.007845	0.002637	0.07	0.00394813	0.00225555	0.3246	G
FatherMetal_Lifespan+AttainedAge	8	133563781	rs10956670	0.0009571	698000	0.004567	0.00741	0.002613	0.02	0.00510109	0.0022303	0.5594	A
FatherMetal_Lifespan+AttainedAge	8	133775851	rs2472230	0.002204	698000	0.01233	0.006421	0.002566	0.023	0.00493651	0.0021916	0.6998	A
FatherMetal_Lifespan+AttainedAge	8	135398029	rs3923951	0.002202	699000	0.03291	-0.006145	0.002881	0.0089	-0.00642953	0.00251304	0.9396	G
FatherMetal_Lifespan+AttainedAge	8	140564192	rs969124	6.459e-05	698000	9.101e-06	0.01198	0.002699	0.06	0.00434754	0.00233238	0.05019	G
FatherMetal_Lifespan+AttainedAge	8	140578820	rs16910949	0.0009588	698000	7.416e-05	0.01422	0.00359	0.2	0.00391773	0.00303408	0.0471	A
FatherMetal_Lifespan+AttainedAge	8	140587030	rs11775044	0.0005347	698000	2.783e-05	0.01339	0.003196	0.19	0.00362912	0.00278734	0.03351	C
FatherMetal_Lifespan+AttainedAge	9	362209	rs4741833	0.001907	698000	0.01903	-0.006178	0.002635	0.013	-0.00564634	0.00226741	0.8811	G
FatherMetal_Lifespan+AttainedAge	9	7372732	rs1926361	0.0008898	698000	0.002501	0.01121	0.003707	0.029	0.00690098	0.003167	0.4246	A
FatherMetal_Lifespan+AttainedAge	9	10178870	rs10958936	0.001675	698000	0.003947	-0.008318	0.002886	0.041	-0.00498665	0.00248199	0.4322	G
FatherMetal_Lifespan+AttainedAge	9	12765117	rs10119113	0.001336	698000	0.01431	-0.007992	0.003263	0.011	-0.007188	0.00282385	0.8512	C
FatherMetal_Lifespan+AttainedAge	9	14078878	rs16931322	0.0006946	697000	0.01017	-0.0122	0.004748	0.0068	-0.0113844	0.00422157	0.8604	G
FatherMetal_Lifespan+AttainedAge	9	14670949	rs10961649	0.001497	698000	0.0527	-0.005259	0.002715	0.003	-0.00695199	0.00233207	0.6757	G
FatherMetal_Lifespan+AttainedAge	9	15516375	rs7857933	0.001118	698000	2.398e-05	0.02159	0.005112	0.33	0.00423113	0.00444365	0.0188	G
FatherMetal_Lifespan+AttainedAge	9	15533394	rs2457637	9.478e-05	697000	0.0006758	0.008659	0.002547	0.0068	0.0058244	0.00218819	0.4525	A
FatherMetal_Lifespan+AttainedAge	9	15591372	rs4741510	1.397e-05	696000	4.034e-05	0.01064	0.002592	0.0066	0.00592971	0.00221105	0.2143	T
FatherMetal_Lifespan+AttainedAge	9	15746302	rs7467207	3.141e-05	698000	1.816e-05	-0.01091	0.002544	0.023	-0.00484907	0.00217825	0.1048	G
FatherMetal_Lifespan+AttainedAge	9	15760988	rs6474967	0.0001036	698000	0.0002805	-0.009241	0.002544	0.014	-0.00528243	0.0021797	0.2896	C
FatherMetal_Lifespan+AttainedAge	9	15765856	rs1592099	1.655e-05	698000	0.000133	0.009727	0.002546	0.0035	0.00632376	0.00218398	0.361	A
FatherMetal_Lifespan+AttainedAge	9	15823667	rs7019205	2.566e-05	698000	1.536e-05	-0.011	0.002544	0.021	-0.00492762	0.00217893	0.1037	A
FatherMetal_Lifespan+AttainedAge	9	15830506	rs4741545	2.546e-06	698000	1.427e-05	0.01103	0.002543	0.0024	0.00652288	0.00217806	0.228	A
FatherMetal_Lifespan+AttainedAge	9	15895539	rs1169478	0.00114	698000	0.000331	-0.009216	0.002567	0.12	-0.00335515	0.0021913	0.1174	A
FatherMetal_Lifespan+AttainedAge	9	15900348	rs1891210	0.0002723	697000	0.0002566	-0.009352	0.002558	0.038	-0.00439695	0.00218942	0.192	A
FatherMetal_Lifespan+AttainedAge	9	15942765	rs2987070	0.0001385	698000	0.0003266	-0.009192	0.002558	0.017	-0.00517699	0.00218995	0.2834	A
FatherMetal_Lifespan+AttainedAge	9	15959700	rs4741552	5.534e-05	698000	0.002075	0.008125	0.002639	0.0014	0.00714362	0.00226008	0.8133	G
FatherMetal_Lifespan+AttainedAge	9	15975069	rs10756730	3.904e-06	686000	2.351e-05	0.01107	0.002617	0.0025	0.00659667	0.00220638	0.2379	A
FatherMetal_Lifespan+AttainedAge	9	16003441	rs3008731	0.0001508	698000	0.004642	0.00721	0.002547	0.0022	0.00665632	0.00218688	0.8857	G
FatherMetal_Lifespan+AttainedAge	9	16012046	rs2987081	0.0009631	697000	0.0009671	-0.008504	0.002577	0.058	-0.00408397	0.00219395	0.2441	A
FatherMetal_Lifespan+AttainedAge	9	16042193	rs1410454	4.773e-05	698000	0.0003802	0.009082	0.002556	0.005	0.00606399	0.00219506	0.4264	C
FatherMetal_Lifespan+AttainedAge	9	16051490	rs10733307	5.652e-05	698000	0.0002511	0.009334	0.00255	0.0081	0.00572287	0.00219908	0.3347	G
FatherMetal_Lifespan+AttainedAge	9	16266732	rs7857514	0.001812	698000	0.0274	0.009347	0.004237	0.0084	0.00974185	0.00368945	0.9712	G
FatherMetal_Lifespan+AttainedAge	9	16342065	rs11794667	0.000942	698000	0.04522	0.005465	0.002729	0.0019	0.00746383	0.00238048	0.6486	A
FatherMetal_Lifespan+AttainedAge	9	16364351	rs7019169	0.00198	698000	0.09133	0.004455	0.002638	0.0021	0.00707157	0.00225945	0.5111	C
FatherMetal_Lifespan+AttainedAge	9	16476144	rs7046884	0.0006967	698000	0.01843	-0.01123	0.004764	0.0037	-0.011795	0.00407286	0.9274	G
FatherMetal_Lifespan+AttainedAge	9	16507737	rs7849139	0.00217	698000	0.003932	-0.01756	0.006091	0.054	-0.0101693	0.00533901	0.3932	C
FatherMetal_Lifespan+AttainedAge	9	16529554	rs10962474	0.002221	698000	0.003749	-0.01587	0.005475	0.057	-0.0088973	0.00482775	0.3789	G
FatherMetal_Lifespan+AttainedAge	9	16719445	rs10962549	0.0005717	698000	0.02307	-0.007717	0.003396	0.0022	-0.00896828	0.00292426	0.8074	G
FatherMetal_Lifespan+AttainedAge	9	16786071	rs10810627	0.001379	698000	0.1429	-0.005343	0.003647	0.00058	-0.0109086	0.00319158	0.3042	A
FatherMetal_Lifespan+AttainedAge	9	16929803	rs10810681	0.0006066	698000	0.001646	-0.00812	0.00258	0.026	-0.00485594	0.00221661	0.3904	G
FatherMetal_Lifespan+AttainedAge	9	16931342	rs10962718	0.000208	698000	0.0003594	-0.009471	0.002654	0.024	-0.00512775	0.00229579	0.2575	G
FatherMetal_Lifespan+AttainedAge	9	16936283	rs7035981	0.0006117	698000	3.142e-05	-0.01264	0.003037	0.2	-0.00337631	0.00266961	0.03367	G
FatherMetal_Lifespan+AttainedAge	9	16950860	rs10962763	0.0005131	693000	0.003939	0.007418	0.002573	0.011	0.00550604	0.00218835	0.6147	A
FatherMetal_Lifespan+AttainedAge	9	18038013	rs1360235	0.001515	698000	0.04336	0.005127	0.002538	0.0039	0.00618577	0.00218391	0.7532	A
FatherMetal_Lifespan+AttainedAge	9	19065295	rs7467618	0.001205	698000	0.005948	-0.007151	0.0026	0.021	-0.00518669	0.00222929	0.5921	A
FatherMetal_Lifespan+AttainedAge	9	19086979	rs2171957	0.0005426	698000	0.005717	-0.008908	0.003223	0.0086	-0.00723797	0.00275003	0.7228	G
FatherMetal_Lifespan+AttainedAge	9	19370108	rs10114375	0.001627	698000	0.6019	-0.002268	0.004348	2.2e-05	-0.0161838	0.00381683	0.03084	C
FatherMetal_Lifespan+AttainedAge	9	21855038	rs3802393	0.002286	696000	0.08495	-0.006512	0.00378	0.0029	-0.0095137	0.00326259	0.5684	G
FatherMetal_Lifespan+AttainedAge	9	21961866	rs7041637	4.355e-06	697000	0.001748	-0.008882	0.002838	6.6e-05	-0.00973989	0.00246424	0.8439	C
FatherMetal_Lifespan+AttainedAge	9	21966221	rs3731257	8.54e-06	698000	0.005658	-0.008058	0.002912	3.9e-05	-0.010266	0.00251856	0.5989	G
FatherMetal_Lifespan+AttainedAge	9	21974218	rs3731239	0.0001134	698000	0.001951	0.008179	0.00264	0.0035	0.00653769	0.00225838	0.6798	A
FatherMetal_Lifespan+AttainedAge	9	22003223	rs3217992	4.439e-12	698000	1.369e-08	-0.01493	0.00263	3e-07	-0.0114592	0.00225798	0.3723	G
FatherMetal_Lifespan+AttainedAge	9	22012051	rs13298881	1.818e-06	697000	6.522e-05	-0.0164	0.004108	0.00054	-0.0122807	0.00356792	0.4735	A
FatherMetal_Lifespan+AttainedAge	9	22012422	rs545226	1.075e-07	692000	4.262e-05	-0.01071	0.002617	2.9e-05	-0.00924895	0.00222373	0.7022	A
FatherMetal_Lifespan+AttainedAge	9	22028801	rs7049105	3.678e-09	697000	8.566e-07	-0.01257	0.002554	1.8e-05	-0.00919347	0.00217808	0.3829	A
FatherMetal_Lifespan+AttainedAge	9	22053591	rs11790231	2.264e-05	698000	5.945e-05	-0.01649	0.004106	0.0084	-0.00948386	0.00363769	0.2233	G
FatherMetal_Lifespan+AttainedAge	9	22056499	rs10120688	9.669e-10	698000	4.581e-08	-0.01391	0.002544	4e-05	-0.00884289	0.00217842	0.1764	G
FatherMetal_Lifespan+AttainedAge	9	22072638	rs9632885	5.305e-22	698000	3.539e-14	-0.01933	0.002551	9.8e-14	-0.0161623	0.00218194	0.4032	G
FatherMetal_Lifespan+AttainedAge	9	22072719	rs10757270	3.567e-16	698000	1.013e-10	-0.0166	0.002568	4.4e-10	-0.0137026	0.00220846	0.4354	A
FatherMetal_Lifespan+AttainedAge	9	22077543	rs1412832	4.23e-09	695000	1.028e-06	0.01357	0.002776	1.8e-05	0.0100233	0.00236319	0.3925	A
FatherMetal_Lifespan+AttainedAge	9	22082375	rs1547705	4.985e-06	698000	0.0002504	-0.01416	0.003867	0.00055	-0.0118413	0.00343513	0.6274	A
FatherMetal_Lifespan+AttainedAge	9	22098574	im:22098574	1.416e-27	699000	5.878e-15	-0.01983	0.00254	1e-19	-0.0196973	0.00217338	0.9923	A
FatherMetal_Lifespan+AttainedAge	9	22098619	im:22098619	1.833e-27	699000	5.815e-15	-0.01983	0.00254	1.4e-19	-0.0196289	0.00217362	0.9741	A
FatherMetal_Lifespan+AttainedAge	9	22099568	im:22099568	1.636e-28	699000	2.746e-15	0.02009	0.002542	1.5e-20	0.0201252	0.00217415	0.9638	A
FatherMetal_Lifespan+AttainedAge	9	22100176	im:22100176	1.573e-28	699000	2.992e-15	0.02006	0.002542	1.3e-20	0.0201736	0.00217409	0.9507	C
FatherMetal_Lifespan+AttainedAge	9	22102165	im:22102165	3.886e-27	699000	6.477e-15	-0.0198	0.00254	3.2e-19	-0.0194402	0.00217506	0.9387	C
FatherMetal_Lifespan+AttainedAge	9	22103813	rs1333042	6.169e-28	698000	6.999e-15	0.01979	0.002542	2.9e-20	0.0199812	0.00217416	0.933	G
FatherMetal_Lifespan+AttainedAge	9	22114495	rs10738609	3.131e-09	698000	3.948e-12	0.01764	0.002542	0.014	0.0311161	0.0128612	0.0008056	G
FatherMetal_Lifespan+AttainedAge	9	26196672	rs2152969	0.001418	698000	0.00545	0.007327	0.002637	0.027	0.00484788	0.00225148	0.5399	G
FatherMetal_Lifespan+AttainedAge	9	26636413	rs7851334	0.0024	698000	0.1221	0.004538	0.002935	0.0018	0.00801687	0.00254472	0.4337	G
FatherMetal_Lifespan+AttainedAge	9	27619290	rs7041638	0.0005455	698000	0.002958	0.01286	0.004327	0.015	0.00878502	0.00368262	0.5378	A
FatherMetal_Lifespan+AttainedAge	9	27627785	rs10968018	0.0005657	697000	0.004094	0.01235	0.004301	0.012	0.00894434	0.00363921	0.6159	A
FatherMetal_Lifespan+AttainedAge	9	28470551	rs1888814	0.0004755	698000	0.1624	-0.003918	0.002804	7.9e-05	-0.00950835	0.00241271	0.1686	G
FatherMetal_Lifespan+AttainedAge	9	28607069	rs10968668	0.001343	697000	0.03711	-0.00881	0.004226	0.004	-0.0100646	0.00350547	0.7941	A
FatherMetal_Lifespan+AttainedAge	9	28616672	rs10812853	0.002472	698000	0.07023	-0.00739	0.004082	0.0042	-0.0098048	0.00343791	0.6562	A
FatherMetal_Lifespan+AttainedAge	9	28697679	rs723979	0.001085	696000	0.02112	-0.007097	0.003078	0.0057	-0.00716322	0.00261179	0.9698	A
FatherMetal_Lifespan+AttainedAge	9	31174646	rs10758031	0.001707	698000	0.04673	-0.005883	0.002958	0.0042	-0.00718857	0.0024842	0.7482	C
FatherMetal_Lifespan+AttainedAge	9	37036247	rs2282079	0.0003884	650000	4.343e-05	0.02877	0.007037	0.098	0.00941592	0.00562105	0.04529	G
FatherMetal_Lifespan+AttainedAge	9	37210264	rs6476618	5.409e-05	698000	0.0002625	0.02687	0.007361	0.0075	0.0174325	0.00658497	0.3467	A
FatherMetal_Lifespan+AttainedAge	9	37433556	rs309453	0.002243	697000	0.08982	0.004602	0.002713	0.0026	0.00694762	0.00233132	0.542	A
FatherMetal_Lifespan+AttainedAge	9	71344802	rs4745228	0.001807	686000	0.02558	0.007693	0.003446	0.009	0.0077837	0.00303805	0.9783	C
FatherMetal_Lifespan+AttainedAge	9	76795159	rs10746938	0.0004515	698000	0.01514	0.006946	0.00286	0.0026	0.00744601	0.00246093	0.9163	A
FatherMetal_Lifespan+AttainedAge	9	76881401	rs670010	0.000268	697000	0.01421	0.0073	0.002977	0.0014	0.00831021	0.00256165	0.8452	A
FatherMetal_Lifespan+AttainedAge	9	76891412	rs2604271	8.686e-05	697000	0.003416	0.009802	0.003348	0.0015	0.00910118	0.00285179	0.8824	A
FatherMetal_Lifespan+AttainedAge	9	77164006	rs4745340	0.002375	698000	0.0005835	0.008781	0.002553	0.17	0.00305386	0.00218243	0.1164	A
FatherMetal_Lifespan+AttainedAge	9	84373209	rs11139400	0.001361	698000	0.005981	-0.007423	0.0027	0.024	-0.00533082	0.00232373	0.5724	C
FatherMetal_Lifespan+AttainedAge	9	91189922	rs4263860	0.001367	698000	0.0208	-0.01351	0.005844	0.0078	-0.0135002	0.00506564	0.983	C
FatherMetal_Lifespan+AttainedAge	9	93667010	rs291765	0.002352	698000	0.0008654	0.01055	0.003167	0.14	0.00402871	0.00276194	0.1522	A
FatherMetal_Lifespan+AttainedAge	9	93692988	rs10123208	0.002342	698000	0.00429	0.01275	0.004463	0.055	0.00738404	0.00381826	0.4	C
FatherMetal_Lifespan+AttainedAge	9	93716229	rs10991719	0.00121	698000	0.0033	0.01658	0.005641	0.033	0.010214	0.00482511	0.4415	A
FatherMetal_Lifespan+AttainedAge	9	94642450	rs4744110	0.0006448	690000	7.753e-05	0.01204	0.003046	0.14	0.00385786	0.00256367	0.05919	A
FatherMetal_Lifespan+AttainedAge	9	94646958	rs10761133	0.001308	698000	0.0003061	0.01019	0.002824	0.14	0.00365316	0.00240701	0.1041	A
FatherMetal_Lifespan+AttainedAge	9	94687927	rs10992161	0.002039	698000	0.002965	0.009071	0.003053	0.061	0.00489453	0.00258948	0.3438	A
FatherMetal_Lifespan+AttainedAge	9	94697108	rs7038397	0.001135	698000	0.008198	0.007484	0.002831	0.015	0.00591309	0.00241771	0.6978	C
FatherMetal_Lifespan+AttainedAge	9	94728959	rs10761137	0.0005967	698000	0.0002382	0.01081	0.002942	0.081	0.00437293	0.00250237	0.1308	G
FatherMetal_Lifespan+AttainedAge	9	95917252	rs10821077	0.002022	698000	0.02224	0.008334	0.003645	0.012	0.00795336	0.00319062	0.9264	C
FatherMetal_Lifespan+AttainedAge	9	96192620	rs2249747	0.001263	698000	0.029	0.00836	0.003829	0.0049	0.00948258	0.00333565	0.8744	G
FatherMetal_Lifespan+AttainedAge	9	96242455	rs4744244	0.0002295	698000	0.04004	0.009415	0.004585	0.00029	0.0146393	0.00400595	0.4653	G
FatherMetal_Lifespan+AttainedAge	9	96353119	rs2150752	0.001712	698000	0.008701	0.008978	0.003422	0.023	0.00678359	0.00296192	0.6392	A
FatherMetal_Lifespan+AttainedAge	9	96379505	rs9409478	4.457e-05	696000	0.007426	0.01208	0.004512	0.00027	0.0144082	0.00392464	0.7632	G
FatherMetal_Lifespan+AttainedAge	9	98326767	rs7875436	0.001838	698000	0.07289	-0.004847	0.002702	0.0026	-0.00702259	0.00233398	0.5849	A
FatherMetal_Lifespan+AttainedAge	9	101172694	rs1537959	0.0002235	697000	0.01648	0.006254	0.002608	0.00092	0.00749335	0.00222732	0.7622	A
FatherMetal_Lifespan+AttainedAge	9	101334556	rs1167769	0.002321	699000	0.01325	-0.006321	0.002552	0.023	-0.00508803	0.00218958	0.7144	A
FatherMetal_Lifespan+AttainedAge	9	102374475	rs4743361	0.002209	698000	0.004656	0.008605	0.003041	0.049	0.00506099	0.00263454	0.4282	G
FatherMetal_Lifespan+AttainedAge	9	106854958	rs1411103	0.001043	697000	0.2788	0.003821	0.003528	9.1e-05	0.0116984	0.00297272	0.116	A
FatherMetal_Lifespan+AttainedAge	9	107588328	rs3824477	0.0006514	698000	0.06721	0.01321	0.007217	0.00063	0.0226796	0.00653016	0.4459	G
FatherMetal_Lifespan+AttainedAge	9	109987079	rs2808374	0.002138	688000	0.01054	-0.007567	0.002959	0.025	-0.00562121	0.00248049	0.6407	A
FatherMetal_Lifespan+AttainedAge	9	110497951	rs10759255	0.001079	697000	0.0009857	-0.008902	0.002702	0.064	-0.00439481	0.00232137	0.2356	G
FatherMetal_Lifespan+AttainedAge	9	110501437	rs1851741	0.0008385	698000	0.001104	-0.008322	0.002551	0.047	-0.00440674	0.00221471	0.2796	G
FatherMetal_Lifespan+AttainedAge	9	110505424	rs10979032	0.001455	698000	0.01598	0.006205	0.002576	0.011	0.00565494	0.00219031	0.8736	A
FatherMetal_Lifespan+AttainedAge	9	110514284	rs10979037	0.001318	697000	0.0128	0.006447	0.00259	0.012	0.00563846	0.00221044	0.8128	G
FatherMetal_Lifespan+AttainedAge	9	110531496	rs10759257	0.001568	698000	0.006613	-0.007276	0.002679	0.026	-0.00519842	0.00230352	0.5755	G
FatherMetal_Lifespan+AttainedAge	9	113162304	rs1887457	0.002124	695000	0.1687	0.004205	0.003055	0.00087	0.00861979	0.00259966	0.3098	C
FatherMetal_Lifespan+AttainedAge	9	119771893	rs1537528	0.002315	698000	0.01969	0.007655	0.003282	0.016	0.00681156	0.00281438	0.8524	G
FatherMetal_Lifespan+AttainedAge	9	120368736	rs10983712	0.001358	698000	0.004083	0.007651	0.002664	0.032	0.00487525	0.00229604	0.4735	A
FatherMetal_Lifespan+AttainedAge	9	120678965	rs7043830	0.00241	698000	0.05301	-0.005026	0.002598	0.0058	-0.00616844	0.00221865	0.7662	A
FatherMetal_Lifespan+AttainedAge	9	124929161	rs7466389	0.002102	698000	0.01528	-0.01883	0.007762	0.018	-0.017153	0.00724299	0.7827	G
FatherMetal_Lifespan+AttainedAge	9	125153352	rs7874531	0.000339	698000	0.008533	-0.05362	0.02039	0.0033	-0.0717208	0.0242809	0.9373	G
FatherMetal_Lifespan+AttainedAge	9	125155685	rs10306188	0.0006977	698000	0.02789	-0.04111	0.01869	0.0023	-0.071182	0.023205	0.7747	A
FatherMetal_Lifespan+AttainedAge	9	126262932	rs2772208	0.002118	698000	0.1984	0.003534	0.002748	0.00063	0.00805573	0.00237042	0.2546	A
FatherMetal_Lifespan+AttainedAge	9	126722647	rs10760302	0.000739	698000	0.0009323	0.009516	0.002875	0.046	0.00491382	0.00245348	0.2668	A
FatherMetal_Lifespan+AttainedAge	9	126959073	rs2767777	0.00208	698000	0.008988	-0.008124	0.00311	0.028	-0.0058671	0.00270891	0.6127	A
FatherMetal_Lifespan+AttainedAge	9	128928087	rs10987177	0.001756	697000	0.03081	-0.005634	0.002609	0.0071	-0.00625379	0.00227655	0.9204	C
FatherMetal_Lifespan+AttainedAge	9	130349014	rs2417053	0.0001347	693000	0.0008475	0.01044	0.003128	0.0083	0.00671731	0.00262344	0.4464	G
FatherMetal_Lifespan+AttainedAge	9	130607518	rs11789185	0.001156	697000	0.008385	-0.0118	0.004476	0.015	-0.00975925	0.00398853	0.6991	C
FatherMetal_Lifespan+AttainedAge	9	134813428	rs4579576	0.00209	697000	0.02317	-0.007628	0.003359	0.012	-0.00716209	0.00286251	0.9316	G
FatherMetal_Lifespan+AttainedAge	9	134881443	rs7025089	0.0008281	698000	0.006914	-0.007347	0.00272	0.012	-0.00582377	0.00233179	0.7043	A
FatherMetal_Lifespan+AttainedAge	9	134912614	rs7467576	0.001774	698000	0.01734	-0.008633	0.003628	0.013	-0.0076281	0.00308518	0.8623	G
FatherMetal_Lifespan+AttainedAge	9	134944428	rs7851262	0.001472	698000	0.02337	-0.006203	0.002736	0.0076	-0.00626707	0.00234427	0.9887	C
FatherMetal_Lifespan+AttainedAge	9	136459543	rs3025316	0.001552	698000	0.03753	-0.0084	0.004038	0.0048	-0.00960373	0.0034138	0.815	A
FatherMetal_Lifespan+AttainedAge	9	137032165	rs28586903	0.002426	699000	0.04735	-0.02189	0.01104	0.0067	-0.0255747	0.00936949	0.813	A
FatherMetal_Lifespan+AttainedAge	9	139389184	rs6563	0.001963	694000	0.2184	-0.003169	0.002575	0.00047	-0.00765435	0.00219306	0.2249	A
FatherMetal_Lifespan+AttainedAge	10	2219930	rs12781711	0.001074	698000	0.1666	0.003702	0.002676	0.00029	0.00841068	0.00228767	0.2325	A
FatherMetal_Lifespan+AttainedAge	10	4135785	rs4881282	0.0002004	699000	0.0006879	0.009956	0.002933	0.015	0.00617307	0.00254115	0.3643	G
FatherMetal_Lifespan+AttainedAge	10	4140086	rs6601810	0.0001205	685000	0.001073	0.01531	0.004681	0.006	0.011258	0.00413221	0.4987	G
FatherMetal_Lifespan+AttainedAge	10	4163987	rs10904194	0.001555	698000	0.004782	0.01069	0.003789	0.033	0.00703609	0.00332657	0.4906	G
FatherMetal_Lifespan+AttainedAge	10	4164550	rs10904195	0.002048	698000	0.005167	0.007511	0.002686	0.042	0.00469359	0.00230223	0.4652	A
[truncated: 3,177 more rows]
